# Supplementary material for: Carta desde Caracas: lecturas dirigidas
Source: HighWire-hosted journal article supplement (doi:10.1101/gr.214221.116), 2009-01-01

Supplemental Fig. S1: Comparison of RNA-seq and RT-qPCR results for selected genes at 120 minutes after social challenge.

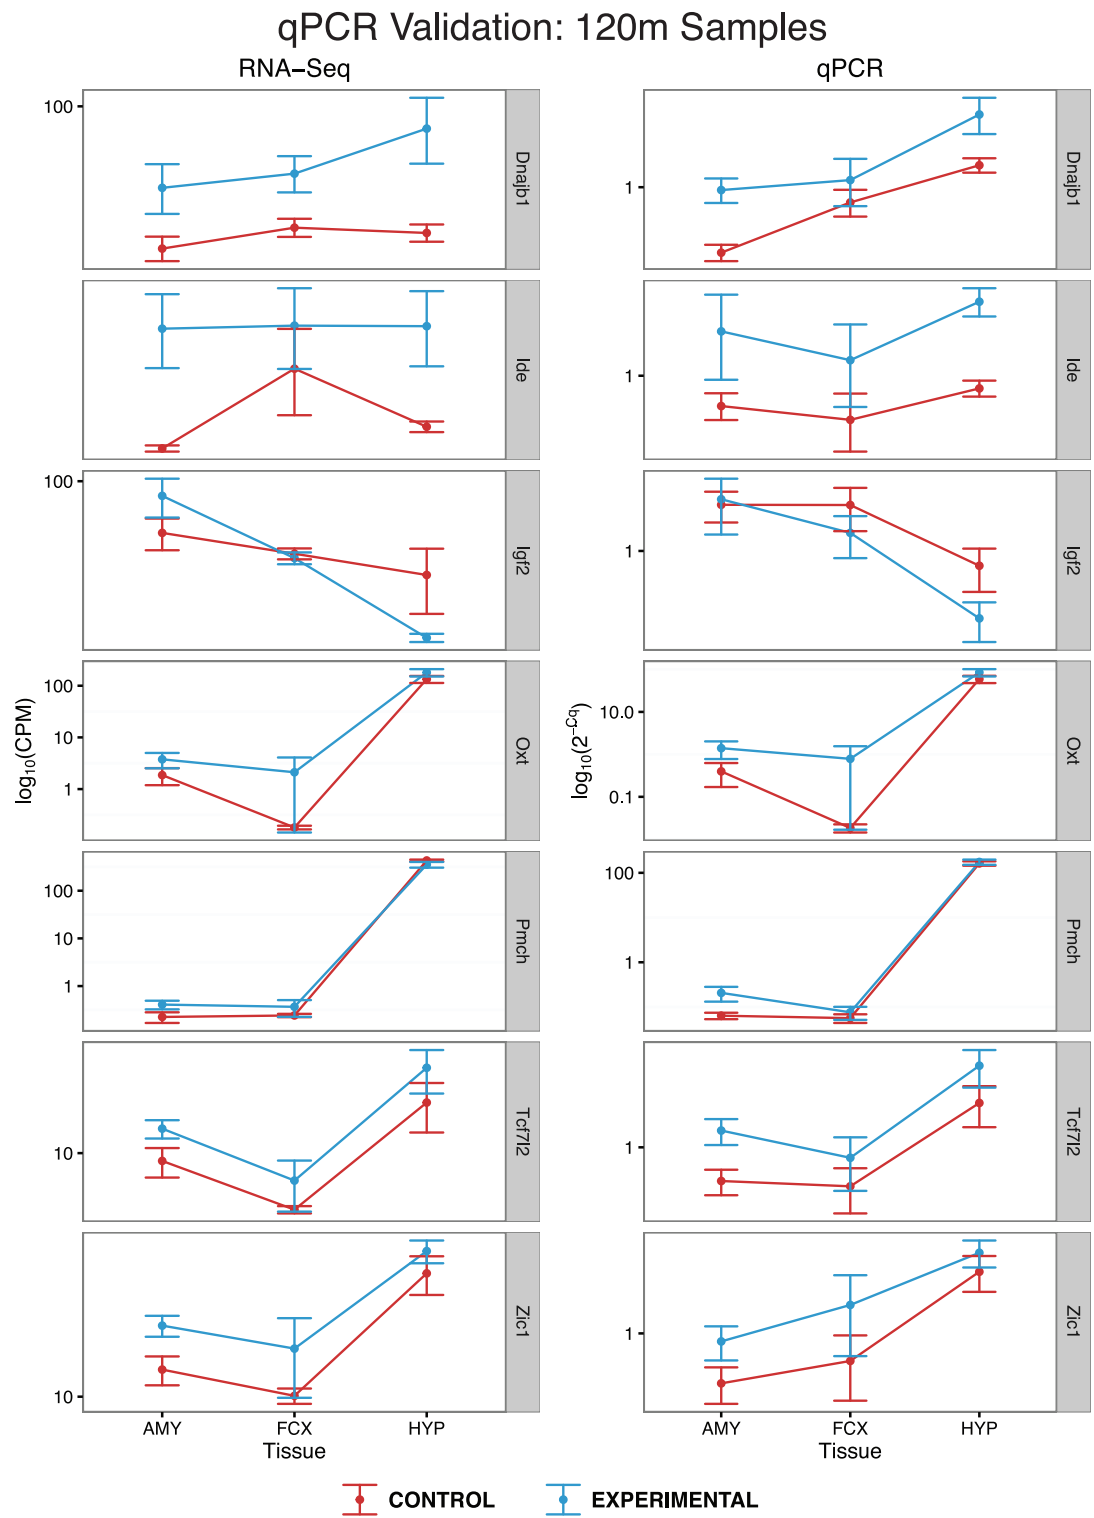

Supplement: Supplemental_Fig_S1.pdf [file Supplemental_Fig_S1.pdf]
