# Supplementary material for: Carta desde Caracas: lecturas dirigidas
Source: HighWire-hosted journal article supplement (doi:10.1101/gr.214221.116), 2009-01-01

Supplemental Fig. S2: Dissection schematic showing: A) Sectioning of mouse brain into slices containing tissues of interest. B) Extraction of each individual region used in this experiment from the slices.

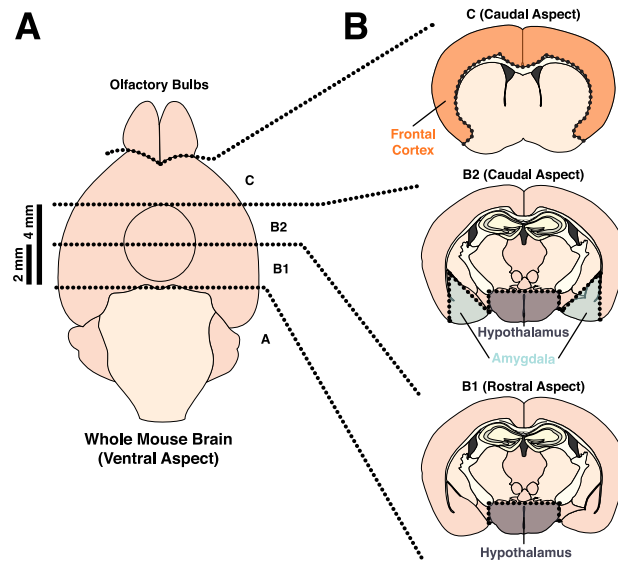

Supplement: Supplemental_Fig_S2.pdf [file Supplemental_Fig_S2.pdf]
