# Supplementary material for: Carta desde Caracas: lecturas dirigidas
Source: HighWire-hosted journal article supplement (doi:10.1101/gr.214221.116), 2009-01-01
Supplement: Supplemental_Table_S8.xlsx [file Supplemental_Table_S8.xlsx]

## Sheet: dictionary
Supplemental Table S8: Cell type population-specific enrichment analysis results.
tab key			column key
tab	description		column	description
AMY	Amygdala PSEA results		mgi_symbol	official MGI mouse gene symbol
FCX	Frontal cortex PSEA results		mgi_description	official MGI mouse gene name
HYP	Hypothalamus PSEA results		chromosome_name	NCBIM37 chromosome name
			start_position	NCBIM37 gene start position on chromosome
			end_position	NCBIM37 gene end posiiton on chromosome
			strand	NCBIM37 strand
			band	NCBIM37 band
			ensembl_gene_id	Ensembl gene ID from NCBIM37
			duplicate	does biomaRt query return more than one value for this Ensembl gene ID?
			model_summary	summary of all models with a BIC within at least 2 of the best model.
			n_models	total number of models in the results
			polymodel	do the results reflect a polymodel instead of a single model?
			polymodel_z_scores	Z scores for the polymodel
			REG_astrocyte_reference	p-value for the relationship between the gene and the astrocyte signature from REG.
			REG_neuron_reference	p-value for the relationship between the gene and the neuron signature from REG.
			REG_oligodendrocyte_reference	p-value for the relationship between the gene and the oligodendrocyte signature from REG.
			REG_microgliAMY_reference	p-value for the relationship between the gene and the microglia signature from REG.
			REG_endothelial_reference	p-value for the relationship between the gene and the endothelial cell signature from REG.

## Sheet: AMY
mgi_symbol	mgi_description	chromosome_name	start_position	end_position	strand	band	ensembl_gene_id	duplicate	model_summary	n_models	polymodel	polymodel_z_scores	AMY_astrocyte_reference	AMY_neuron_reference	AMY_oligodendrocyte_reference	AMY_microgliAMY_reference	AMY_endothelial_reference
Gnai3	guanine nucleotide binding protein (G protein), alpha inhibiting 3	3	107910198	107949064	-1	F2.3	ENSMUSG00000000001	FALSE	(ENSMUSG00000000001 ~ A_microglia_reference + A_neuron_reference) BIC = -77.74;(ENSMUSG00000000001 ~ A_astrocyte_reference + A_microglia_reference + A_neuron_reference) BIC = -76.5	2	TRUE	A_microglia_reference = 3.0217;A_neuron_reference = 2.7964;A_astrocyte_reference = 1.33	0.183522	0.00516826	NA	0.00251392	NA
Cdc45	cell division cycle 45 homolog (S. cerevisiae)	16	18780540	18812080	-1	A3	ENSMUSG00000000028	FALSE	(ENSMUSG00000000028 ~ A_endothelial_reference + A_neuron_reference) BIC = 1.78;(ENSMUSG00000000028 ~ A_endothelial_reference + A_oligodendrocyte_reference) BIC = 2.96	2	TRUE	A_endothelial_reference = 2.3261;A_neuron_reference = 2.7362;A_oligodendrocyte_reference = 2.5004	NA	0.00621453	0.0124068	NA	0.0200153
H19	H19 fetal liver mRNA	7	149761434	149764048	-1	F5	ENSMUSG00000000031	FALSE	(ENSMUSG00000000031 ~ A_oligodendrocyte_reference) BIC = 93.63;(ENSMUSG00000000031 ~ A_microglia_reference + A_oligodendrocyte_reference) BIC = 94.1;(ENSMUSG00000000031 ~ A_microglia_reference) BIC = 95.26;(ENSMUSG00000000031 ~ A_astrocyte_reference + A_oligodendrocyte_reference) BIC = 95.35	4	TRUE	A_oligodendrocyte_reference = 2.3062;A_microglia_reference = 1.8121;A_astrocyte_reference = 1.1926	0.233039	NA	0.0210984	0.0699633	NA
Scml2	sex comb on midleg-like 2 (Drosophila)	X	157555125	157696145	1	F4	ENSMUSG00000000037	FALSE	(ENSMUSG00000000037 ~ A_microglia_reference + A_oligodendrocyte_reference) BIC = -2.75;(ENSMUSG00000000037 ~ 1) BIC = -1.19;(ENSMUSG00000000037 ~ A_microglia_reference + A_neuron_reference) BIC = -1.04	3	TRUE	A_microglia_reference = 2.5566;A_oligodendrocyte_reference = 2.2199;A_neuron_reference = 1.8137	NA	0.0697244	0.0264276	0.0105698	NA
Narf	nuclear prelamin A recognition factor	11	121098567	121117170	1	E2	ENSMUSG00000000056	FALSE	(ENSMUSG00000000056 ~ 1) BIC = -55.71	1	FALSE	NA	NA	NA	NA	NA	NA
Cav2	caveolin 2	6	17231185	17239115	1	A2	ENSMUSG00000000058	FALSE	(ENSMUSG00000000058 ~ A_astrocyte_reference + A_microglia_reference + A_neuron_reference) BIC = -43.23;(ENSMUSG00000000058 ~ A_astrocyte_reference + A_microglia_reference + A_oligodendrocyte_reference) BIC = -41.43	2	TRUE	A_astrocyte_reference = 3.2722;A_microglia_reference = 3.2816;A_neuron_reference = 2.6366;A_oligodendrocyte_reference = 2.273	0.00106706	0.00837438	0.0230276	0.00103233	NA
Klf6	Kruppel-like factor 6	13	5860735	5869639	1	A1	ENSMUSG00000000078	FALSE	(ENSMUSG00000000078 ~ A_microglia_reference + A_neuron_reference) BIC = -59.08;(ENSMUSG00000000078 ~ A_endothelial_reference + A_neuron_reference) BIC = -58.61;(ENSMUSG00000000078 ~ A_neuron_reference) BIC = -58.47;(ENSMUSG00000000078 ~ A_endothelial_reference + A_microglia_reference + A_neuron_reference) BIC = -57.79	4	TRUE	A_microglia_reference = 1.703;A_neuron_reference = 4.148;A_endothelial_reference = 1.5447	NA	3.354e-05	NA	0.0885728	0.122416
Scmh1	sex comb on midleg homolog 1	4	120077886	120202804	1	D2.2	ENSMUSG00000000085	FALSE	(ENSMUSG00000000085 ~ A_endothelial_reference) BIC = -65.66;(ENSMUSG00000000085 ~ 1) BIC = -65.1;(ENSMUSG00000000085 ~ A_neuron_reference + A_oligodendrocyte_reference) BIC = -64.81;(ENSMUSG00000000085 ~ A_microglia_reference + A_neuron_reference) BIC = -64.35;(ENSMUSG00000000085 ~ A_endothelial_reference + A_neuron_reference) BIC = -64.27;(ENSMUSG00000000085 ~ A_microglia_reference + A_neuron_re…	6	TRUE	A_endothelial_reference = 1.9019;A_neuron_reference = 1.6978;A_oligodendrocyte_reference = 1.8126;A_microglia_reference = 1.6661	NA	0.0895501	0.069887	0.0956842	0.0571839
Cox5a	cytochrome c oxidase, subunit Va	9	57369039	57380231	1	B	ENSMUSG00000000088	FALSE	(ENSMUSG00000000088 ~ A_endothelial_reference + A_neuron_reference) BIC = -42.32;(ENSMUSG00000000088 ~ A_endothelial_reference + A_neuron_reference + A_oligodendrocyte_reference) BIC = -41.06;(ENSMUSG00000000088 ~ A_neuron_reference + A_oligodendrocyte_reference) BIC = -40.82	3	TRUE	A_endothelial_reference = 2.1134;A_neuron_reference = 3.7292;A_oligodendrocyte_reference = 1.5878	NA	0.0001921	0.112341	NA	0.0345707
Tbx2	T-box 2	11	85646053	85655450	1	C	ENSMUSG00000000093	FALSE	(ENSMUSG00000000093 ~ A_endothelial_reference) BIC = 16.36;(ENSMUSG00000000093 ~ A_endothelial_reference + A_neuron_reference) BIC = 16.81;(ENSMUSG00000000093 ~ A_endothelial_reference + A_oligodendrocyte_reference) BIC = 17.16;(ENSMUSG00000000093 ~ A_endothelial_reference + A_microglia_reference + A_neuron_reference) BIC = 17.42;(ENSMUSG00000000093 ~ A_astrocyte_reference + A_endothelial_referen…	7	TRUE	A_endothelial_reference = 2.2337;A_neuron_reference = 1.7694;A_oligodendrocyte_reference = 1.5984;A_microglia_reference = 1.578;A_astrocyte_reference = 1.3981	0.162072	0.0768283	0.109949	0.114572	0.0255015
Ngfr	nerve growth factor receptor (TNFR superfamily, member 16)	11	95430132	95449049	-1	D	ENSMUSG00000000120	FALSE	(ENSMUSG00000000120 ~ A_neuron_reference + A_oligodendrocyte_reference) BIC = 51.51	1	FALSE	NA	NA	1.19945e-13	0.00643859	NA	NA
Wnt3	wingless-related MMTV integration site 3	11	103635464	103679271	1	E1	ENSMUSG00000000125	FALSE	(ENSMUSG00000000125 ~ A_neuron_reference + A_oligodendrocyte_reference) BIC = 17.15;(ENSMUSG00000000125 ~ A_oligodendrocyte_reference) BIC = 17.95;(ENSMUSG00000000125 ~ A_neuron_reference) BIC = 18.39	3	TRUE	A_neuron_reference = 2.1151;A_oligodendrocyte_reference = 2.2956	NA	0.034418	0.0216972	NA	NA
Wnt9a	wingless-type MMTV integration site 9A	11	59120430	59147054	1	B1.3	ENSMUSG00000000126	FALSE	(ENSMUSG00000000126 ~ A_neuron_reference) BIC = 28.15;(ENSMUSG00000000126 ~ A_endothelial_reference + A_neuron_reference) BIC = 28.68;(ENSMUSG00000000126 ~ A_endothelial_reference + A_neuron_reference + A_oligodendrocyte_reference) BIC = 29.98	3	TRUE	A_neuron_reference = 6.3693;A_endothelial_reference = 1.6674;A_oligodendrocyte_reference = 1.3099	NA	0	0.190222	NA	0.095437
Fer	fer (fms/fps related) protein kinase	17	64213364	64488843	1	E1.1	ENSMUSG00000000127	FALSE	(ENSMUSG00000000127 ~ 1) BIC = -46.34;(ENSMUSG00000000127 ~ A_endothelial_reference) BIC = -45.58	2	TRUE	A_endothelial_reference = 1.5383	NA	NA	NA	NA	0.123968
Xpo6	exportin 6	7	133245229	133344015	-1	F3	ENSMUSG00000000131	FALSE	(ENSMUSG00000000131 ~ A_microglia_reference + A_oligodendrocyte_reference) BIC = -87.57;(ENSMUSG00000000131 ~ 1) BIC = -86.01	2	TRUE	A_microglia_reference = 2.3831;A_oligodendrocyte_reference = 2.5621	NA	NA	0.010405	0.0171675	NA
Tfe3	transcription factor E3	X	7339686	7352328	1	A1.1	ENSMUSG00000000134	FALSE	(ENSMUSG00000000134 ~ A_astrocyte_reference + A_endothelial_reference + A_microglia_reference + A_neuron_reference) BIC = -76.21;(ENSMUSG00000000134 ~ A_endothelial_reference + A_microglia_reference) BIC = -76.04;(ENSMUSG00000000134 ~ A_endothelial_reference + A_microglia_reference + A_oligodendrocyte_reference) BIC = -75.03;(ENSMUSG00000000134 ~ A_endothelial_reference + A_microglia_reference + …	4	TRUE	A_astrocyte_reference = 1.9516;A_endothelial_reference = 2.9458;A_microglia_reference = 2.901;A_neuron_reference = 1.7391;A_oligodendrocyte_reference = 1.4015	0.050986	0.0820107	0.161076	0.00371927	0.00322103
Axin2	axin2	11	108781663	108812097	1	E1	ENSMUSG00000000142	FALSE	(ENSMUSG00000000142 ~ A_astrocyte_reference) BIC = -35.98;(ENSMUSG00000000142 ~ A_neuron_reference) BIC = -35.64;(ENSMUSG00000000142 ~ A_microglia_reference) BIC = -35.07	3	TRUE	A_astrocyte_reference = 2.2616;A_neuron_reference = 2.1828;A_microglia_reference = 2.0481	0.0237214	0.029052	NA	0.0405534	NA
Baat1	BRCA1-associated ATM activator 1	5	141180965	141195333	1	G2	ENSMUSG00000000148	FALSE	(ENSMUSG00000000148 ~ A_microglia_reference) BIC = -64.51;(ENSMUSG00000000148 ~ A_microglia_reference + A_oligodendrocyte_reference) BIC = -63.7;(ENSMUSG00000000148 ~ A_endothelial_reference + A_microglia_reference) BIC = -62.97;(ENSMUSG00000000148 ~ A_astrocyte_reference + A_microglia_reference) BIC = -62.57	4	TRUE	A_microglia_reference = 3.5007;A_oligodendrocyte_reference = 1.4901;A_endothelial_reference = 1.2552;A_astrocyte_reference = 1.1087	0.267576	NA	0.136209	0.00046398	0.209402
Gna12	guanine nucleotide binding protein, alpha 12	5	141234362	141306385	-1	G2	ENSMUSG00000000149	FALSE	(ENSMUSG00000000149 ~ A_endothelial_reference + A_microglia_reference + A_neuron_reference) BIC = -50.09;(ENSMUSG00000000149 ~ A_astrocyte_reference + A_endothelial_reference + A_neuron_reference) BIC = -49.12;(ENSMUSG00000000149 ~ A_microglia_reference + A_neuron_reference) BIC = -48.94;(ENSMUSG00000000149 ~ A_astrocyte_reference + A_endothelial_reference + A_microglia_reference + A_neuron_refer…	5	TRUE	A_endothelial_reference = 1.9666;A_microglia_reference = 2.0001;A_neuron_reference = 4.1802;A_astrocyte_reference = 1.7002	0.0890876	2.913e-05	NA	0.0454882	0.0492329
Pih1d2	PIH1 domain containing 2	9	50425426	50433105	1	A5.3	ENSMUSG00000000167	FALSE	(ENSMUSG00000000167 ~ A_endothelial_reference + A_neuron_reference) BIC = -11.4;(ENSMUSG00000000167 ~ A_endothelial_reference + A_microglia_reference + A_neuron_reference) BIC = -9.81	2	TRUE	A_endothelial_reference = 3.1392;A_neuron_reference = 5.0649;A_microglia_reference = 1.2158	NA	4.1e-07	NA	0.224058	0.00169393
Dlat	dihydrolipoamide S-acetyltransferase (E2 component of pyruvate dehydrogenase complex)	9	50442738	50467885	-1	A5.3	ENSMUSG00000000168	FALSE	(ENSMUSG00000000168 ~ A_neuron_reference) BIC = -98.62	1	FALSE	NA	NA	4.08062e-07	NA	NA	NA
Sdhd	succinate dehydrogenase complex, subunit D, integral membrane protein	9	50404443	50411954	-1	A5.3	ENSMUSG00000000171	FALSE	(ENSMUSG00000000171 ~ A_neuron_reference + A_oligodendrocyte_reference) BIC = -62.72;(ENSMUSG00000000171 ~ A_endothelial_reference + A_neuron_reference + A_oligodendrocyte_reference) BIC = -62.2;(ENSMUSG00000000171 ~ A_endothelial_reference + A_microglia_reference + A_neuron_reference + A_oligodendrocyte_reference) BIC = -61.31	3	TRUE	A_neuron_reference = 5.0453;A_oligodendrocyte_reference = 2.7501;A_endothelial_reference = 1.6362;A_microglia_reference = 1.4083	NA	4.5e-07	0.00595746	0.159034	0.101796
Ccnd2	cyclin D2	6	127075797	127101066	-1	F3	ENSMUSG00000000184	FALSE	(ENSMUSG00000000184 ~ A_neuron_reference) BIC = -7.64	1	FALSE	NA	NA	3.12159e-07	NA	NA	NA
Gpr107	G protein-coupled receptor 107	2	31007836	31075068	1	B	ENSMUSG00000000194	FALSE	(ENSMUSG00000000194 ~ 1) BIC = -103.82	1	FALSE	NA	NA	NA	NA	NA	NA
Nalcn	sodium leak channel, non-selective	14	123675863	124026366	-1	E5	ENSMUSG00000000197	FALSE	(ENSMUSG00000000197 ~ A_endothelial_reference + A_oligodendrocyte_reference) BIC = -66.74;(ENSMUSG00000000197 ~ A_endothelial_reference + A_microglia_reference + A_oligodendrocyte_reference) BIC = -64.75	2	TRUE	A_endothelial_reference = 3.4666;A_oligodendrocyte_reference = 2.6641;A_microglia_reference = 1.0659	NA	NA	0.00771867	0.286491	0.00052703
Btbd17	BTB (POZ) domain containing 17	11	114652531	114657259	-1	E2	ENSMUSG00000000202	FALSE	(ENSMUSG00000000202 ~ A_astrocyte_reference + A_endothelial_reference) BIC = -28.31;(ENSMUSG00000000202 ~ A_astrocyte_reference + A_endothelial_reference + A_oligodendrocyte_reference) BIC = -26.66	2	TRUE	A_astrocyte_reference = 2.6437;A_endothelial_reference = 3.0462;A_oligodendrocyte_reference = 1.1916	0.0082012	NA	0.233419	NA	0.00231764
Th	tyrosine hydroxylase	7	150078657	150117033	-1	F5	ENSMUSG00000000214	FALSE	(ENSMUSG00000000214 ~ A_microglia_reference + A_neuron_reference) BIC = 27.73;(ENSMUSG00000000214 ~ A_astrocyte_reference + A_microglia_reference + A_neuron_reference) BIC = 29.61	2	TRUE	A_microglia_reference = 2.7977;A_neuron_reference = 7.9419;A_astrocyte_reference = 1.1109	0.266603	0	NA	0.00514664	NA
Drp2	dystrophin related protein 2	X	130939090	130991112	1	E3	ENSMUSG00000000223	FALSE	(ENSMUSG00000000223 ~ A_neuron_reference) BIC = -47.81;(ENSMUSG00000000223 ~ A_microglia_reference + A_neuron_reference) BIC = -46.61;(ENSMUSG00000000223 ~ A_astrocyte_reference + A_neuron_reference) BIC = -46.48;(ENSMUSG00000000223 ~ A_astrocyte_reference) BIC = -46.2	4	TRUE	A_neuron_reference = 2.6695;A_microglia_reference = 1.3701;A_astrocyte_reference = 1.7751	0.0758836	0.00759617	NA	0.170664	NA
Lhx2	LIM homeobox protein 2	2	38194801	38225253	1	B	ENSMUSG00000000247	FALSE	(ENSMUSG00000000247 ~ A_microglia_reference + A_neuron_reference + A_oligodendrocyte_reference) BIC = -15.02;(ENSMUSG00000000247 ~ A_endothelial_reference + A_microglia_reference + A_neuron_reference + A_oligodendrocyte_reference) BIC = -14.27	2	TRUE	A_microglia_reference = 2.8115;A_neuron_reference = 5.0589;A_oligodendrocyte_reference = 2.852;A_endothelial_reference = 1.4465	NA	4.2e-07	0.00434385	0.00493118	0.148033
Gmpr	guanosine monophosphate reductase	13	45602813	45641751	1	A5	ENSMUSG00000000253	FALSE	(ENSMUSG00000000253 ~ A_endothelial_reference + A_neuron_reference) BIC = -30.2	1	FALSE	NA	NA	6.82681e-06	NA	NA	0.0216573
Glra1	glycine receptor, alpha 1 subunit	11	55327740	55421700	-1	B1.3	ENSMUSG00000000263	FALSE	(ENSMUSG00000000263 ~ A_endothelial_reference) BIC = 52.71;(ENSMUSG00000000263 ~ A_endothelial_reference + A_microglia_reference) BIC = 53.17;(ENSMUSG00000000263 ~ A_astrocyte_reference + A_endothelial_reference + A_microglia_reference) BIC = 54.37;(ENSMUSG00000000263 ~ A_endothelial_reference + A_microglia_reference + A_oligodendrocyte_reference) BIC = 54.65	4	TRUE	A_endothelial_reference = 2.7163;A_microglia_reference = 1.6683;A_astrocyte_reference = 1.3421;A_oligodendrocyte_reference = 1.2508	0.179574	NA	0.210995	0.0952634	0.00660252
Mid2	midline 2	X	137199138	137302254	1	F1	ENSMUSG00000000266	FALSE	(ENSMUSG00000000266 ~ A_astrocyte_reference + A_endothelial_reference + A_microglia_reference + A_neuron_reference + A_oligodendrocyte_reference) BIC = -78.92;(ENSMUSG00000000266 ~ A_astrocyte_reference + A_microglia_reference + A_neuron_reference + A_oligodendrocyte_reference) BIC = -78.47	2	TRUE	A_astrocyte_reference = 2.2498;A_endothelial_reference = 1.7223;A_microglia_reference = 3.2752;A_neuron_reference = 3.3657;A_oligodendrocyte_reference = 4.3026	0.024459	0.00076348	1.688e-05	0.0010559	0.0850223
Trim25	tripartite motif-containing 25	11	88860690	88881607	1	C	ENSMUSG00000000275	FALSE	(ENSMUSG00000000275 ~ A_endothelial_reference + A_microglia_reference + A_oligodendrocyte_reference) BIC = -37.94;(ENSMUSG00000000275 ~ A_endothelial_reference + A_microglia_reference + A_neuron_reference) BIC = -37.38;(ENSMUSG00000000275 ~ A_endothelial_reference + A_microglia_reference + A_neuron_reference + A_oligodendrocyte_reference) BIC = -36.62;(ENSMUSG00000000275 ~ A_astrocyte_reference +…	4	TRUE	A_endothelial_reference = 2.8419;A_microglia_reference = 2.2748;A_oligodendrocyte_reference = 2.3292;A_neuron_reference = 1.9299;A_astrocyte_reference = 1.9737	0.0484138	0.0536202	0.0198495	0.0229151	0.00448407
Dgke	diacylglycerol kinase, epsilon	11	88896493	88928164	-1	C	ENSMUSG00000000276	FALSE	(ENSMUSG00000000276 ~ A_endothelial_reference + A_neuron_reference) BIC = -71.62;(ENSMUSG00000000276 ~ A_astrocyte_reference + A_endothelial_reference + A_neuron_reference) BIC = -70.27	2	TRUE	A_endothelial_reference = 2.7395;A_neuron_reference = 3.667;A_astrocyte_reference = 1.291	0.196698	0.00024542	NA	NA	0.00615244
Scpep1	serine carboxypeptidase 1	11	88785334	88816779	-1	C	ENSMUSG00000000278	FALSE	(ENSMUSG00000000278 ~ A_oligodendrocyte_reference) BIC = -47.61;(ENSMUSG00000000278 ~ 1) BIC = -46.56;(ENSMUSG00000000278 ~ A_neuron_reference) BIC = -46.3;(ENSMUSG00000000278 ~ A_endothelial_reference + A_oligodendrocyte_reference) BIC = -45.94	4	TRUE	A_oligodendrocyte_reference = 2.082;A_neuron_reference = 1.6813;A_endothelial_reference = 1.2069	NA	0.0926972	0.0373462	NA	0.227487
Mnt	max binding protein	11	74644422	74659227	1	B5	ENSMUSG00000000282	FALSE	(ENSMUSG00000000282 ~ A_microglia_reference + A_neuron_reference) BIC = -29.86;(ENSMUSG00000000282 ~ A_astrocyte_reference + A_oligodendrocyte_reference) BIC = -29.26;(ENSMUSG00000000282 ~ A_astrocyte_reference + A_neuron_reference) BIC = -27.98;(ENSMUSG00000000282 ~ A_microglia_reference + A_neuron_reference + A_oligodendrocyte_reference) BIC = -27.95	4	TRUE	A_microglia_reference = 2.2235;A_neuron_reference = 2.7199;A_astrocyte_reference = 2.3775;A_oligodendrocyte_reference = 1.7585	0.0174318	0.00653032	0.0786618	0.0261833	NA
Itgb2	integrin beta 2	10	76992997	77028453	1	C1	ENSMUSG00000000290	FALSE	(ENSMUSG00000000290 ~ A_neuron_reference) BIC = -25.82;(ENSMUSG00000000290 ~ A_astrocyte_reference) BIC = -24.46	2	TRUE	A_neuron_reference = 3.4749;A_astrocyte_reference = 3.2243	0.0012626	0.000511022	NA	NA	NA
Hddc2	HD domain containing 2	10	31033188	31048010	1	A4	ENSMUSG00000000295	FALSE	(ENSMUSG00000000295 ~ 1) BIC = -26.74;(ENSMUSG00000000295 ~ A_oligodendrocyte_reference) BIC = -25.58;(ENSMUSG00000000295 ~ A_neuron_reference + A_oligodendrocyte_reference) BIC = -24.78	3	TRUE	A_oligodendrocyte_reference = 1.3975;A_neuron_reference = 1.4928	NA	0.135486	0.162265	NA	NA
Tpd52l1	tumor protein D52-like 1	10	31052186	31165727	-1	A4	ENSMUSG00000000296	FALSE	(ENSMUSG00000000296 ~ A_astrocyte_reference + A_endothelial_reference + A_oligodendrocyte_reference) BIC = -4.53;(ENSMUSG00000000296 ~ A_astrocyte_reference + A_oligodendrocyte_reference) BIC = -3.49	2	TRUE	A_astrocyte_reference = 2.1679;A_endothelial_reference = 1.9424;A_oligodendrocyte_reference = 3.2805	0.0301665	NA	0.00103618	NA	0.0520935
Pemt	phosphatidylethanolamine N-methyltransferase	11	59784116	59859991	-1	B1.3	ENSMUSG00000000301	FALSE	(ENSMUSG00000000301 ~ A_microglia_reference) BIC = 0.31;(ENSMUSG00000000301 ~ 1) BIC = 0.38;(ENSMUSG00000000301 ~ A_astrocyte_reference + A_microglia_reference) BIC = 2	3	TRUE	A_microglia_reference = 1.6979;A_astrocyte_reference = 1.2025	0.229187	NA	NA	0.0895219	NA
Cdh1	cadherin 1	8	109127251	109194146	1	D3	ENSMUSG00000000303	FALSE	(ENSMUSG00000000303 ~ A_microglia_reference) BIC = 65.04;(ENSMUSG00000000303 ~ A_endothelial_reference + A_microglia_reference) BIC = 65.21;(ENSMUSG00000000303 ~ A_microglia_reference + A_neuron_reference) BIC = 66.35	3	TRUE	A_microglia_reference = 4.2172;A_endothelial_reference = 1.676;A_neuron_reference = 1.336	NA	0.181553	NA	2.474e-05	0.0937479
Cdh4	cadherin 4	2	179177136	179634078	1	H4	ENSMUSG00000000305	FALSE	(ENSMUSG00000000305 ~ A_neuron_reference) BIC = -25.99	1	FALSE	NA	NA	0.0001497	NA	NA	NA
Ckmt1	creatine kinase, mitochondrial 1, ubiquitous	2	121183450	121189473	1	E5	ENSMUSG00000000308	FALSE	(ENSMUSG00000000308 ~ A_microglia_reference + A_neuron_reference) BIC = -49.61;(ENSMUSG00000000308 ~ A_endothelial_reference + A_microglia_reference + A_neuron_reference) BIC = -47.85;(ENSMUSG00000000308 ~ A_neuron_reference) BIC = -47.72	3	TRUE	A_microglia_reference = 2.0337;A_neuron_reference = 3.7424;A_endothelial_reference = 1.1555	NA	0.00018227	NA	0.0419825	0.247869
Bcl6b	B cell CLL/lymphoma 6, member B	11	70037630	70043300	-1	B3	ENSMUSG00000000317	FALSE	(ENSMUSG00000000317 ~ A_endothelial_reference) BIC = -188.88	1	FALSE	NA	NA	NA	NA	NA	5.19398e-52
Arvcf	armadillo repeat gene deleted in velo-cardio-facial syndrome	16	18348275	18407169	1	A3	ENSMUSG00000000325	FALSE	(ENSMUSG00000000325 ~ A_neuron_reference) BIC = -42.85;(ENSMUSG00000000325 ~ A_astrocyte_reference) BIC = -42.24;(ENSMUSG00000000325 ~ A_astrocyte_reference + A_neuron_reference) BIC = -41.09	3	TRUE	A_neuron_reference = 2.2819;A_astrocyte_reference = 1.9369	0.0527547	0.0224968	NA	NA	NA
Comt	catechol-O-methyltransferase	16	18406979	18426945	-1	A3	ENSMUSG00000000326	FALSE	(ENSMUSG00000000326 ~ A_astrocyte_reference + A_endothelial_reference) BIC = -35.77;(ENSMUSG00000000326 ~ A_endothelial_reference + A_neuron_reference) BIC = -34.08	2	TRUE	A_astrocyte_reference = 2.6917;A_endothelial_reference = 2.1147;A_neuron_reference = 2.345	0.0071095	0.0190273	NA	NA	0.0344522
Rtcd1	RNA terminal phosphate cyclase domain 1	3	116191881	116211126	-1	G1	ENSMUSG00000000339	FALSE	(ENSMUSG00000000339 ~ 1) BIC = -62.24	1	FALSE	NA	NA	NA	NA	NA	NA
Dbt	dihydrolipoamide branched chain transacylase E2	3	116215988	116252894	1	G1	ENSMUSG00000000340	FALSE	(ENSMUSG00000000340 ~ A_microglia_reference + A_oligodendrocyte_reference) BIC = -47.09;(ENSMUSG00000000340 ~ A_microglia_reference) BIC = -47.07;(ENSMUSG00000000340 ~ A_endothelial_reference + A_microglia_reference) BIC = -46.1;(ENSMUSG00000000340 ~ A_endothelial_reference + A_microglia_reference + A_oligodendrocyte_reference) BIC = -45.66	4	TRUE	A_microglia_reference = 2.7384;A_oligodendrocyte_reference = 1.668;A_endothelial_reference = 1.3579	NA	NA	0.095308	0.0061733	0.174487
Dazap2	DAZ associated protein 2	15	100446069	100451184	1	F1	ENSMUSG00000000346	FALSE	(ENSMUSG00000000346 ~ A_endothelial_reference + A_microglia_reference) BIC = -74.35	1	FALSE	NA	NA	NA	NA	5.06978e-05	0.0312197
Mcts1	malignant T cell amplified sequence 1	X	35953755	35966699	1	A3.3	ENSMUSG00000000355	FALSE	(ENSMUSG00000000355 ~ 1) BIC = -63.72	1	FALSE	NA	NA	NA	NA	NA	NA
Trappc10	trafficking protein particle complex 10	10	77649470	77707387	-1	C1	ENSMUSG00000000374	FALSE	(ENSMUSG00000000374 ~ 1) BIC = -97.22;(ENSMUSG00000000374 ~ A_neuron_reference + A_oligodendrocyte_reference) BIC = -96.64;(ENSMUSG00000000374 ~ A_endothelial_reference) BIC = -96.28;(ENSMUSG00000000374 ~ A_astrocyte_reference + A_neuron_reference + A_oligodendrocyte_reference) BIC = -96.2	4	TRUE	A_neuron_reference = 2.2809;A_oligodendrocyte_reference = 2.1749;A_endothelial_reference = 1.4776;A_astrocyte_reference = 1.5685	0.116774	0.0225558	0.029638	NA	0.139504
Ccm2	cerebral cavernous malformation 2 homolog (human)	11	6446890	6496747	1	A1	ENSMUSG00000000378	FALSE	(ENSMUSG00000000378 ~ A_astrocyte_reference + A_endothelial_reference + A_neuron_reference) BIC = -8.18;(ENSMUSG00000000378 ~ A_endothelial_reference + A_microglia_reference + A_neuron_reference) BIC = -7;(ENSMUSG00000000378 ~ A_endothelial_reference + A_neuron_reference) BIC = -6.95	3	TRUE	A_astrocyte_reference = 1.9867;A_endothelial_reference = 2.2804;A_neuron_reference = 3.2616;A_microglia_reference = 1.6975	0.0469548	0.00110789	NA	0.0896051	0.022583
Tbrg4	transforming growth factor beta regulated gene 4	11	6515601	6526070	-1	A1	ENSMUSG00000000384	FALSE	(ENSMUSG00000000384 ~ A_microglia_reference + A_neuron_reference) BIC = -59.4;(ENSMUSG00000000384 ~ A_endothelial_reference + A_microglia_reference + A_neuron_reference) BIC = -59.23;(ENSMUSG00000000384 ~ A_microglia_reference + A_neuron_reference + A_oligodendrocyte_reference) BIC = -57.55	3	TRUE	A_microglia_reference = 2.9002;A_neuron_reference = 3.0556;A_endothelial_reference = 1.6409;A_oligodendrocyte_reference = 1.1213	NA	0.0022462	0.262162	0.0037288	0.100828
Fap	fibroblast activation protein	2	62339000	62412132	-1	C1.3	ENSMUSG00000000392	FALSE	(ENSMUSG00000000392 ~ A_oligodendrocyte_reference) BIC = 57.13;(ENSMUSG00000000392 ~ A_microglia_reference + A_oligodendrocyte_reference) BIC = 58.86	2	TRUE	A_oligodendrocyte_reference = 2.7786;A_microglia_reference = 1.1897	NA	NA	0.00545982	0.234156	NA
Ndufa9	NADH dehydrogenase (ubiquinone) 1 alpha subcomplex, 9	6	126771881	126799162	-1	F3	ENSMUSG00000000399	FALSE	(ENSMUSG00000000399 ~ A_endothelial_reference + A_neuron_reference) BIC = -65.09;(ENSMUSG00000000399 ~ A_neuron_reference + A_oligodendrocyte_reference) BIC = -64.23;(ENSMUSG00000000399 ~ A_endothelial_reference + A_microglia_reference + A_neuron_reference) BIC = -64.15;(ENSMUSG00000000399 ~ A_endothelial_reference + A_microglia_reference + A_neuron_reference + A_oligodendrocyte_reference) BIC = …	6	TRUE	A_endothelial_reference = 1.9602;A_neuron_reference = 2.7019;A_oligodendrocyte_reference = 1.5707;A_microglia_reference = 1.5582	NA	0.00689414	0.116245	0.119191	0.0499666
Egfl6	EGF-like-domain, multiple 6	X	162960939	163023652	-1	F5	ENSMUSG00000000402	FALSE	(ENSMUSG00000000402 ~ 1) BIC = -8.23;(ENSMUSG00000000402 ~ A_endothelial_reference) BIC = -6.55	2	TRUE	A_endothelial_reference = 1.2303	NA	NA	NA	NA	0.218588
Lck	lymphocyte protein tyrosine kinase	4	129225588	129250885	-1	D2.2	ENSMUSG00000000409	FALSE	(ENSMUSG00000000409 ~ A_oligodendrocyte_reference) BIC = -0.99;(ENSMUSG00000000409 ~ A_endothelial_reference + A_oligodendrocyte_reference) BIC = -0.8;(ENSMUSG00000000409 ~ A_endothelial_reference + A_neuron_reference + A_oligodendrocyte_reference) BIC = -0.39;(ENSMUSG00000000409 ~ A_endothelial_reference + A_microglia_reference + A_neuron_reference + A_oligodendrocyte_reference) BIC = 0.64	4	TRUE	A_oligodendrocyte_reference = 2.2674;A_endothelial_reference = 1.8975;A_neuron_reference = 1.6671;A_microglia_reference = 1.3652	NA	0.095504	0.0233669	0.172178	0.0577574
Cttnbp2	cortactin binding protein 2	6	18316478	18465338	-1	A2	ENSMUSG00000000416	FALSE	(ENSMUSG00000000416 ~ 1) BIC = -28.82;(ENSMUSG00000000416 ~ A_neuron_reference) BIC = -27.51	2	TRUE	A_neuron_reference = 1.361	NA	0.173521	NA	NA	NA
Galnt1	UDP-N-acetyl-alpha-D-galactosamine:polypeptide N-acetylgalactosaminyltransferase 1	18	24363845	24445319	1	A2	ENSMUSG00000000420	FALSE	(ENSMUSG00000000420 ~ A_microglia_reference + A_neuron_reference + A_oligodendrocyte_reference) BIC = -75.35;(ENSMUSG00000000420 ~ A_neuron_reference + A_oligodendrocyte_reference) BIC = -75.08;(ENSMUSG00000000420 ~ A_astrocyte_reference + A_neuron_reference + A_oligodendrocyte_reference) BIC = -74.19;(ENSMUSG00000000420 ~ A_microglia_reference + A_neuron_reference) BIC = -73.77;(ENSMUSG000000004…	5	TRUE	A_microglia_reference = 1.8568;A_neuron_reference = 2.485;A_oligodendrocyte_reference = 2.3189;A_astrocyte_reference = 1.7413	0.0816267	0.012955	0.0204013	0.0633458	NA
Mkrn2	makorin, ring finger protein, 2	6	115551949	115568688	1	E3	ENSMUSG00000000439	FALSE	(ENSMUSG00000000439 ~ A_neuron_reference) BIC = -65.99;(ENSMUSG00000000439 ~ A_astrocyte_reference) BIC = -64.76	2	TRUE	A_neuron_reference = 2.5363;A_astrocyte_reference = 2.2666	0.0234171	0.0112019	NA	NA	NA
Pparg	peroxisome proliferator activated receptor gamma	6	115311239	115440419	1	E3	ENSMUSG00000000440	FALSE	(ENSMUSG00000000440 ~ A_neuron_reference) BIC = 28.5	1	FALSE	NA	NA	0.00176508	NA	NA	NA
Raf1	v-raf-leukemia viral oncogene 1	6	115568085	115626653	-1	E3	ENSMUSG00000000441	FALSE	(ENSMUSG00000000441 ~ A_endothelial_reference + A_neuron_reference) BIC = -76.35;(ENSMUSG00000000441 ~ A_endothelial_reference + A_microglia_reference + A_neuron_reference + A_oligodendrocyte_reference) BIC = -76.07;(ENSMUSG00000000441 ~ A_endothelial_reference + A_neuron_reference + A_oligodendrocyte_reference) BIC = -75.96;(ENSMUSG00000000441 ~ A_endothelial_reference + A_microglia_reference + …	4	TRUE	A_endothelial_reference = 2.6779;A_neuron_reference = 2.6955;A_microglia_reference = 1.4993;A_oligodendrocyte_reference = 1.7375	NA	0.00702907	0.0823047	0.133785	0.00740875
Pdgfb	platelet derived growth factor, B polypeptide	15	79826330	79845238	-1	E1	ENSMUSG00000000489	FALSE	(ENSMUSG00000000489 ~ A_astrocyte_reference + A_neuron_reference + A_oligodendrocyte_reference) BIC = -2.34;(ENSMUSG00000000489 ~ A_neuron_reference + A_oligodendrocyte_reference) BIC = -2.12;(ENSMUSG00000000489 ~ A_endothelial_reference + A_neuron_reference) BIC = -1.73;(ENSMUSG00000000489 ~ A_astrocyte_reference + A_oligodendrocyte_reference) BIC = -1.47;(ENSMUSG00000000489 ~ A_endothelial_refe…	8	TRUE	A_astrocyte_reference = 1.753;A_neuron_reference = 2.4839;A_oligodendrocyte_reference = 1.9839;A_endothelial_reference = 1.5748	0.0795961	0.0129961	0.0472703	NA	0.115304
Acvrl1	activin A receptor, type II-like 1	15	100958953	100975767	1	F2	ENSMUSG00000000530	FALSE	(ENSMUSG00000000530 ~ A_endothelial_reference) BIC = 9.07;(ENSMUSG00000000530 ~ A_endothelial_reference + A_neuron_reference) BIC = 9.98	2	TRUE	A_endothelial_reference = 4.9413;A_neuron_reference = 1.4603	NA	0.144204	NA	NA	7.8e-07
Grasp	GRP1 (general receptor for phosphoinositides 1)-associated scaffold protein	15	101054638	101063186	1	F2	ENSMUSG00000000531	FALSE	(ENSMUSG00000000531 ~ A_neuron_reference) BIC = 12.15;(ENSMUSG00000000531 ~ A_oligodendrocyte_reference) BIC = 13.78	2	TRUE	A_neuron_reference = 3.1782;A_oligodendrocyte_reference = 2.867	NA	0.00148209	0.00414358	NA	NA
Acvr1b	activin A receptor, type 1B	15	101004556	101043032	1	F2	ENSMUSG00000000532	FALSE	(ENSMUSG00000000532 ~ A_neuron_reference) BIC = -52.08;(ENSMUSG00000000532 ~ A_endothelial_reference + A_neuron_reference) BIC = -50.67	2	TRUE	A_neuron_reference = 2.9355;A_endothelial_reference = 1.3012	NA	0.00333036	NA	NA	0.19319
Tom1l2	target of myb1-like 2 (chicken)	11	60040216	60166407	-1	B2	ENSMUSG00000000538	FALSE	(ENSMUSG00000000538 ~ 1) BIC = -81.49	1	FALSE	NA	NA	NA	NA	NA	NA
Zfp385a	zinc finger protein 385A	15	103144319	103170517	-1	F3	ENSMUSG00000000552	FALSE	(ENSMUSG00000000552 ~ A_endothelial_reference + A_neuron_reference) BIC = -29.8;(ENSMUSG00000000552 ~ A_endothelial_reference + A_neuron_reference + A_oligodendrocyte_reference) BIC = -29.72	2	TRUE	A_endothelial_reference = 3.2077;A_neuron_reference = 5.1661;A_oligodendrocyte_reference = 1.6644	NA	2.4e-07	0.0960282	NA	0.0013379
Itga5	integrin alpha 5 (fibronectin receptor alpha)	15	103174720	103197194	-1	F3	ENSMUSG00000000555	FALSE	(ENSMUSG00000000555 ~ A_endothelial_reference + A_microglia_reference + A_neuron_reference + A_oligodendrocyte_reference) BIC = 50.18;(ENSMUSG00000000555 ~ A_endothelial_reference + A_microglia_reference + A_oligodendrocyte_reference) BIC = 50.59;(ENSMUSG00000000555 ~ A_endothelial_reference + A_microglia_reference + A_neuron_reference) BIC = 50.74;(ENSMUSG00000000555 ~ A_astrocyte_reference + A_…	5	TRUE	A_endothelial_reference = 3.8554;A_microglia_reference = 2.2033;A_neuron_reference = 2.1049;A_oligodendrocyte_reference = 2.3165;A_astrocyte_reference = 2.2474	0.0246149	0.0352976	0.0205335	0.0275722	0.00011555
Gabra2	gamma-aminobutyric acid (GABA) A receptor, subunit alpha 2	5	71352296	71487088	-1	C3.1	ENSMUSG00000000560	FALSE	(ENSMUSG00000000560 ~ A_endothelial_reference + A_neuron_reference) BIC = -19.55;(ENSMUSG00000000560 ~ A_endothelial_reference + A_microglia_reference + A_neuron_reference) BIC = -17.6	2	TRUE	A_endothelial_reference = 3.8736;A_neuron_reference = 5.9712;A_microglia_reference = 1.0838	NA	0	NA	0.278446	0.00010724
Wdr77	WD repeat domain 77	3	105762287	105787518	1	F2.2	ENSMUSG00000000561	FALSE	(ENSMUSG00000000561 ~ A_endothelial_reference + A_oligodendrocyte_reference) BIC = -71.99;(ENSMUSG00000000561 ~ A_endothelial_reference + A_microglia_reference + A_oligodendrocyte_reference) BIC = -71.91;(ENSMUSG00000000561 ~ A_endothelial_reference + A_microglia_reference + A_neuron_reference) BIC = -70.4;(ENSMUSG00000000561 ~ A_astrocyte_reference + A_endothelial_reference + A_oligodendrocyte_r…	5	TRUE	A_endothelial_reference = 3.1246;A_oligodendrocyte_reference = 2.8927;A_microglia_reference = 1.6749;A_neuron_reference = 2.7179;A_astrocyte_reference = 1.1969	0.231335	0.0065707	0.00381955	0.0939507	0.00178057
Adora3	adenosine A3 receptor	3	105673776	105711846	1	F2.2	ENSMUSG00000000562	FALSE	(ENSMUSG00000000562 ~ 1) BIC = 28.94;(ENSMUSG00000000562 ~ A_endothelial_reference) BIC = 29.69;(ENSMUSG00000000562 ~ A_neuron_reference) BIC = 29.83;(ENSMUSG00000000562 ~ A_microglia_reference + A_neuron_reference) BIC = 30.24;(ENSMUSG00000000562 ~ A_endothelial_reference + A_neuron_reference) BIC = 30.46	5	TRUE	A_endothelial_reference = 1.5392;A_neuron_reference = 1.5836;A_microglia_reference = 1.6068	NA	0.113292	NA	0.108106	0.123763
Atp5f1	ATP synthase, H+ transporting, mitochondrial F0 complex, subunit B1	3	105745616	105763017	-1	F2.2	ENSMUSG00000000563	FALSE	(ENSMUSG00000000563 ~ A_endothelial_reference + A_neuron_reference) BIC = -60.53;(ENSMUSG00000000563 ~ A_endothelial_reference + A_microglia_reference + A_neuron_reference) BIC = -58.94;(ENSMUSG00000000563 ~ A_neuron_reference) BIC = -58.88	3	TRUE	A_endothelial_reference = 2.1855;A_neuron_reference = 5.8146;A_microglia_reference = 1.2127	NA	1e-08	NA	0.225263	0.0288553
Sox9	SRY-box containing gene 9	11	112643538	112649074	1	E2	ENSMUSG00000000567	FALSE	(ENSMUSG00000000567 ~ A_astrocyte_reference + A_endothelial_reference) BIC = -10.6;(ENSMUSG00000000567 ~ A_astrocyte_reference) BIC = -9.77;(ENSMUSG00000000567 ~ A_endothelial_reference + A_oligodendrocyte_reference) BIC = -9.52;(ENSMUSG00000000567 ~ A_oligodendrocyte_reference) BIC = -9.46;(ENSMUSG00000000567 ~ A_endothelial_reference + A_neuron_reference) BIC = -8.91	5	TRUE	A_astrocyte_reference = 2.3321;A_endothelial_reference = 1.917;A_oligodendrocyte_reference = 2.1754;A_neuron_reference = 1.8793	0.0196971	0.0602041	0.0295991	NA	0.0552359
Hnrnpd	heterogeneous nuclear ribonucleoprotein D	5	100387445	100407957	-1	E4	ENSMUSG00000000568	FALSE	(ENSMUSG00000000568 ~ A_astrocyte_reference + A_endothelial_reference + A_neuron_reference) BIC = -63.23;(ENSMUSG00000000568 ~ A_astrocyte_reference + A_oligodendrocyte_reference) BIC = -62.62;(ENSMUSG00000000568 ~ A_microglia_reference + A_oligodendrocyte_reference) BIC = -62.59;(ENSMUSG00000000568 ~ A_astrocyte_reference + A_neuron_reference) BIC = -61.95;(ENSMUSG00000000568 ~ 1) BIC = -61.63;(…	6	TRUE	A_astrocyte_reference = 2.1583;A_endothelial_reference = 2;A_neuron_reference = 2.8134;A_oligodendrocyte_reference = 2.1809;A_microglia_reference = 1.9897	0.0309077	0.00490162	0.029192	0.046625	0.0454998
Dynlt1c	dynein light chain Tctex-type 1C	17	6646959	6655064	-1	A1	ENSMUSG00000000579	FALSE	(ENSMUSG00000000579 ~ A_microglia_reference) BIC = -18.97	1	FALSE	NA	NA	NA	NA	0.00151913	NA
C1d	C1D nuclear receptor co-repressor	11	17157582	17169179	1	A2	ENSMUSG00000000581	FALSE	(ENSMUSG00000000581 ~ 1) BIC = -48.04;(ENSMUSG00000000581 ~ A_endothelial_reference) BIC = -46.52;(ENSMUSG00000000581 ~ A_microglia_reference) BIC = -46.14	3	TRUE	A_endothelial_reference = 1.2854;A_microglia_reference = 1.1451	NA	NA	NA	0.252166	0.198638
Gm2a	GM2 ganglioside activator protein	11	54911617	54926531	1	B1.3	ENSMUSG00000000594	FALSE	(ENSMUSG00000000594 ~ A_microglia_reference) BIC = -77.26	1	FALSE	NA	NA	NA	NA	3.47521e-05	NA
Krit1	KRIT1, ankyrin repeat containing	5	3803165	3847487	1	A1	ENSMUSG00000000600	FALSE	(ENSMUSG00000000600 ~ A_oligodendrocyte_reference) BIC = -50.06;(ENSMUSG00000000600 ~ 1) BIC = -48.95;(ENSMUSG00000000600 ~ A_endothelial_reference) BIC = -48.41;(ENSMUSG00000000600 ~ A_endothelial_reference + A_oligodendrocyte_reference) BIC = -48.4;(ENSMUSG00000000600 ~ A_astrocyte_reference) BIC = -48.21;(ENSMUSG00000000600 ~ A_microglia_reference) BIC = -48.16	6	TRUE	A_oligodendrocyte_reference = 1.9243;A_endothelial_reference = 1.3817;A_astrocyte_reference = 1.5449;A_microglia_reference = 1.5291	0.122381	NA	0.0543123	0.126228	0.167062
Clcn4-2	chloride channel 4-2	7	7235027	7252222	-1	A1	ENSMUSG00000000605	FALSE	(ENSMUSG00000000605 ~ 1) BIC = -104.91;(ENSMUSG00000000605 ~ A_microglia_reference) BIC = -104.8;(ENSMUSG00000000605 ~ A_oligodendrocyte_reference) BIC = -104.32	3	TRUE	A_microglia_reference = 1.7241;A_oligodendrocyte_reference = 1.5878	NA	NA	0.112324	0.0846914	NA
Sema4f	sema domain, immunoglobulin domain (Ig), TM domain, and short cytoplasmic domain	6	82861879	82889763	-1	C3	ENSMUSG00000000627	FALSE	(ENSMUSG00000000627 ~ A_neuron_reference) BIC = -41.82;(ENSMUSG00000000627 ~ A_microglia_reference + A_neuron_reference) BIC = -41.64	2	TRUE	A_neuron_reference = 3.7409;A_microglia_reference = 1.6696	NA	0.00018335	NA	0.0949945	NA
Hk2	hexokinase 2	6	82675019	82724448	-1	C3	ENSMUSG00000000628	FALSE	(ENSMUSG00000000628 ~ A_endothelial_reference + A_neuron_reference) BIC = -33.76;(ENSMUSG00000000628 ~ A_endothelial_reference + A_microglia_reference) BIC = -32.18;(ENSMUSG00000000628 ~ A_endothelial_reference + A_oligodendrocyte_reference) BIC = -31.97;(ENSMUSG00000000628 ~ A_endothelial_reference) BIC = -31.92	4	TRUE	A_endothelial_reference = 2.6525;A_neuron_reference = 2.1693;A_microglia_reference = 1.7884;A_oligodendrocyte_reference = 1.7342	NA	0.030063	0.0828794	0.0737061	0.00799089
Myo18a	myosin XVIIIA	11	77576748	77679482	1	B5	ENSMUSG00000000631	FALSE	(ENSMUSG00000000631 ~ A_oligodendrocyte_reference) BIC = -77.76	1	FALSE	NA	NA	NA	0.0170051	NA	NA
Sez6	seizure related gene 6	11	77744302	77792550	1	B5	ENSMUSG00000000632	FALSE	(ENSMUSG00000000632 ~ A_endothelial_reference + A_neuron_reference) BIC = -1.46;(ENSMUSG00000000632 ~ A_endothelial_reference + A_oligodendrocyte_reference) BIC = -0.99;(ENSMUSG00000000632 ~ A_astrocyte_reference + A_endothelial_reference + A_oligodendrocyte_reference) BIC = -0.94;(ENSMUSG00000000632 ~ A_astrocyte_reference + A_endothelial_reference) BIC = -0.27;(ENSMUSG00000000632 ~ A_astrocyte_…	6	TRUE	A_endothelial_reference = 2.81;A_neuron_reference = 2.0333;A_oligodendrocyte_reference = 1.8828;A_astrocyte_reference = 1.6891	0.0912062	0.0420221	0.0597265	NA	0.00495407
Cd52	CD52 antigen	4	133638363	133650997	-1	D3	ENSMUSG00000000682	FALSE	(ENSMUSG00000000682 ~ A_endothelial_reference + A_neuron_reference) BIC = 26.85;(ENSMUSG00000000682 ~ A_neuron_reference) BIC = 27.75	2	TRUE	A_endothelial_reference = 1.9483;A_neuron_reference = 3.1799	NA	0.00147343	NA	NA	0.0513837
Abhd15	abhydrolase domain containing 15	11	77328623	77352109	1	B5	ENSMUSG00000000686	FALSE	(ENSMUSG00000000686 ~ 1) BIC = 17.04;(ENSMUSG00000000686 ~ A_endothelial_reference) BIC = 17.56	2	TRUE	A_endothelial_reference = 1.6088	NA	NA	NA	NA	0.107663
Loxl3	lysyl oxidase-like 3	6	82984167	83002556	1	C3	ENSMUSG00000000693	FALSE	(ENSMUSG00000000693 ~ A_oligodendrocyte_reference) BIC = -40.11	1	FALSE	NA	NA	NA	0.00177087	NA	NA
Kat2b	K(lysine) acetyltransferase 2B	17	53706186	53812045	1	C	ENSMUSG00000000708	FALSE	(ENSMUSG00000000708 ~ A_endothelial_reference + A_neuron_reference + A_oligodendrocyte_reference) BIC = -48.11;(ENSMUSG00000000708 ~ A_endothelial_reference + A_microglia_reference + A_neuron_reference + A_oligodendrocyte_reference) BIC = -47.13	2	TRUE	A_endothelial_reference = 2.918;A_neuron_reference = 3.7987;A_oligodendrocyte_reference = 3.9729;A_microglia_reference = 1.3796	NA	0.00014544	7.099e-05	0.167697	0.00352317
Rab5b	RAB5B, member RAS oncogene family	10	128114249	128133324	-1	D3	ENSMUSG00000000711	FALSE	(ENSMUSG00000000711 ~ A_astrocyte_reference) BIC = -102.54;(ENSMUSG00000000711 ~ A_neuron_reference) BIC = -101.67	2	TRUE	A_astrocyte_reference = 2.7483;A_neuron_reference = 2.5704	0.00599054	0.0101573	NA	NA	NA
Icosl	icos ligand	10	77532105	77546000	1	C1	ENSMUSG00000000732	FALSE	(ENSMUSG00000000732 ~ A_neuron_reference) BIC = -16.82;(ENSMUSG00000000732 ~ A_microglia_reference + A_neuron_reference) BIC = -15.32	2	TRUE	A_neuron_reference = 3.1548;A_microglia_reference = 1.2705	NA	0.00160581	NA	0.203913	NA
Spg7	spastic paraplegia 7 homolog (human)	8	125586842	125621660	1	E1	ENSMUSG00000000738	FALSE	(ENSMUSG00000000738 ~ A_astrocyte_reference) BIC = -62.61;(ENSMUSG00000000738 ~ 1) BIC = -62.54;(ENSMUSG00000000738 ~ A_endothelial_reference) BIC = -60.88;(ENSMUSG00000000738 ~ A_microglia_reference) BIC = -60.75	4	TRUE	A_astrocyte_reference = 1.7716;A_endothelial_reference = 1.2372;A_microglia_reference = 1.1884	0.0764573	NA	NA	0.23467	0.216026
Rpl13	ribosomal protein L13	8	125626250	125629144	1	E1	ENSMUSG00000000740	FALSE	(ENSMUSG00000000740 ~ A_endothelial_reference + A_neuron_reference + A_oligodendrocyte_reference) BIC = -45.35;(ENSMUSG00000000740 ~ A_neuron_reference + A_oligodendrocyte_reference) BIC = -44.78;(ENSMUSG00000000740 ~ A_endothelial_reference + A_microglia_reference + A_neuron_reference + A_oligodendrocyte_reference) BIC = -43.58	3	TRUE	A_endothelial_reference = 1.8768;A_neuron_reference = 3.6718;A_oligodendrocyte_reference = 3.7805;A_microglia_reference = 1.1269	NA	0.00024082	0.00015652	0.259776	0.0605497
Chmp1a	charged multivesicular body protein 1A	8	125728164	125736663	-1	E1	ENSMUSG00000000743	FALSE	(ENSMUSG00000000743 ~ A_microglia_reference + A_oligodendrocyte_reference) BIC = -70.07;(ENSMUSG00000000743 ~ A_astrocyte_reference + A_microglia_reference + A_oligodendrocyte_reference) BIC = -69.18;(ENSMUSG00000000743 ~ A_microglia_reference + A_neuron_reference + A_oligodendrocyte_reference) BIC = -68.17	3	TRUE	A_microglia_reference = 2.5732;A_oligodendrocyte_reference = 4.9097;A_astrocyte_reference = 1.4364;A_neuron_reference = 1.1013	0.15089	0.270778	9.1e-07	0.0100771	NA
Rpa1	replication protein A1	11	75111668	75161826	-1	B5	ENSMUSG00000000751	FALSE	(ENSMUSG00000000751 ~ A_microglia_reference + A_neuron_reference) BIC = -64.9;(ENSMUSG00000000751 ~ A_microglia_reference + A_neuron_reference + A_oligodendrocyte_reference) BIC = -63.54	2	TRUE	A_microglia_reference = 2.5643;A_neuron_reference = 2.6307;A_oligodendrocyte_reference = 1.2908	NA	0.00852017	0.196787	0.0103395	NA
Serpinf1	serine (or cysteine) peptidase inhibitor, clade F, member 1	11	75223271	75236203	-1	B5	ENSMUSG00000000753	FALSE	(ENSMUSG00000000753 ~ A_endothelial_reference + A_microglia_reference + A_oligodendrocyte_reference) BIC = -11.75	1	FALSE	NA	NA	NA	0.00495315	7.2292e-09	0.858842
Tubgcp3	tubulin, gamma complex associated protein 3	8	12614277	12672248	-1	A1.1	ENSMUSG00000000759	FALSE	(ENSMUSG00000000759 ~ A_microglia_reference) BIC = -69.09	1	FALSE	NA	NA	NA	NA	0.00298614	NA
Oprm1	opioid receptor, mu 1	10	3308332	3588035	-1	A1	ENSMUSG00000000766	FALSE	(ENSMUSG00000000766 ~ A_endothelial_reference) BIC = 30.38;(ENSMUSG00000000766 ~ A_endothelial_reference + A_microglia_reference + A_oligodendrocyte_reference) BIC = 31.14;(ENSMUSG00000000766 ~ A_endothelial_reference + A_oligodendrocyte_reference) BIC = 31.87	3	TRUE	A_endothelial_reference = 3.5628;A_microglia_reference = 1.8686;A_oligodendrocyte_reference = 1.5998	NA	NA	0.109651	0.061682	0.00036694
Polr3d	polymerase (RNA) III (DNA directed) polypeptide D	14	70838555	70843278	-1	D2	ENSMUSG00000000776	FALSE	(ENSMUSG00000000776 ~ A_endothelial_reference) BIC = -75.8;(ENSMUSG00000000776 ~ 1) BIC = -75.51;(ENSMUSG00000000776 ~ A_microglia_reference) BIC = -74.33	3	TRUE	A_endothelial_reference = 1.8313;A_microglia_reference = 1.4026	NA	NA	NA	0.160735	0.0670595
Tcf7	transcription factor 7, T cell specific	11	52065873	52096681	-1	B1.3	ENSMUSG00000000782	FALSE	(ENSMUSG00000000782 ~ A_endothelial_reference + A_neuron_reference + A_oligodendrocyte_reference) BIC = 39.31;(ENSMUSG00000000782 ~ A_endothelial_reference + A_neuron_reference) BIC = 41.05	2	TRUE	A_endothelial_reference = 3.023;A_neuron_reference = 2.4917;A_oligodendrocyte_reference = 2.1007	NA	0.0127132	0.0356709	NA	0.002503
Ddx3x	DEAD/H (Asp-Glu-Ala-Asp/His) box polypeptide 3, X-linked	X	12858096	12871178	1	A1.1	ENSMUSG00000000787	FALSE	(ENSMUSG00000000787 ~ A_oligodendrocyte_reference) BIC = -66.99;(ENSMUSG00000000787 ~ A_neuron_reference) BIC = -66.07;(ENSMUSG00000000787 ~ A_endothelial_reference + A_neuron_reference) BIC = -65.87;(ENSMUSG00000000787 ~ A_microglia_reference + A_oligodendrocyte_reference) BIC = -65.76;(ENSMUSG00000000787 ~ A_neuron_reference + A_oligodendrocyte_reference) BIC = -65.53;(ENSMUSG00000000787 ~ A_mi…	6	TRUE	A_oligodendrocyte_reference = 2.4828;A_neuron_reference = 2.3132;A_endothelial_reference = 1.6655;A_microglia_reference = 1.4407	NA	0.0207111	0.0130355	0.149677	0.0958074
Il12rb1	interleukin 12 receptor, beta 1	8	73332348	73345323	1	B3.3	ENSMUSG00000000791	FALSE	(ENSMUSG00000000791 ~ A_oligodendrocyte_reference) BIC = 56.99;(ENSMUSG00000000791 ~ A_microglia_reference + A_neuron_reference + A_oligodendrocyte_reference) BIC = 57.4;(ENSMUSG00000000791 ~ A_microglia_reference + A_oligodendrocyte_reference) BIC = 57.75;(ENSMUSG00000000791 ~ A_neuron_reference + A_oligodendrocyte_reference) BIC = 58.03;(ENSMUSG00000000791 ~ A_neuron_reference) BIC = 58.35;(ENS…	6	TRUE	A_oligodendrocyte_reference = 2.6648;A_microglia_reference = 1.6866;A_neuron_reference = 1.8027;A_astrocyte_reference = 1.3752	0.169075	0.0714296	0.00770417	0.0916831	NA
Slc5a5	solute carrier family 5 (sodium iodide symporter), member 5	8	73406788	73416656	-1	B3.3	ENSMUSG00000000792	FALSE	(ENSMUSG00000000792 ~ 1) BIC = -20.39	1	FALSE	NA	NA	NA	NA	NA	NA
Kcnn3	potassium intermediate/small conductance calcium-activated channel, subfamily N, member 3	3	89324086	89471683	1	F1	ENSMUSG00000000794	FALSE	(ENSMUSG00000000794 ~ A_endothelial_reference) BIC = 5.35	1	FALSE	NA	NA	NA	NA	NA	0.00680907
Usp32	ubiquitin specific peptidase 32	11	84797944	84953663	-1	C	ENSMUSG00000000804	FALSE	(ENSMUSG00000000804 ~ A_endothelial_reference) BIC = -60.04;(ENSMUSG00000000804 ~ A_endothelial_reference + A_oligodendrocyte_reference) BIC = -58.47	2	TRUE	A_endothelial_reference = 3.4404;A_oligodendrocyte_reference = 1.2462	NA	NA	0.212709	NA	0.00058093
Car4	carbonic anhydrase 4	11	84771288	84779546	1	C	ENSMUSG00000000805	FALSE	(ENSMUSG00000000805 ~ A_astrocyte_reference + A_microglia_reference + A_neuron_reference + A_oligodendrocyte_reference) BIC = -2.25;(ENSMUSG00000000805 ~ A_astrocyte_reference + A_neuron_reference + A_oligodendrocyte_reference) BIC = -1.81	2	TRUE	A_astrocyte_reference = 2.7869;A_microglia_reference = 1.7598;A_neuron_reference = 2.306;A_oligodendrocyte_reference = 2.4372	0.00532119	0.0211081	0.0147995	0.0784392	NA
Txnrd3	thioredoxin reductase 3	6	89593982	89625523	1	D1	ENSMUSG00000000811	FALSE	(ENSMUSG00000000811 ~ A_neuron_reference) BIC = -11.59;(ENSMUSG00000000811 ~ A_oligodendrocyte_reference) BIC = -11.43;(ENSMUSG00000000811 ~ A_microglia_reference) BIC = -11.3;(ENSMUSG00000000811 ~ A_microglia_reference + A_neuron_reference) BIC = -11.07;(ENSMUSG00000000811 ~ A_astrocyte_reference) BIC = -10.7;(ENSMUSG00000000811 ~ A_microglia_reference + A_oligodendrocyte_reference) BIC = -10.64…	7	TRUE	A_neuron_reference = 2.0772;A_oligodendrocyte_reference = 1.8649;A_microglia_reference = 1.7959;A_astrocyte_reference = 1.7796	0.0751369	0.0377802	0.0621919	0.0725145	NA
Znf512b	zinc finger protein 512B	2	181316808	181327508	-1	H4	ENSMUSG00000000823	FALSE	(ENSMUSG00000000823 ~ A_microglia_reference) BIC = -35.7;(ENSMUSG00000000823 ~ A_endothelial_reference + A_microglia_reference) BIC = -34	2	TRUE	A_microglia_reference = 3.6673;A_endothelial_reference = 1.1985	NA	NA	NA	0.00024516	0.230726
Dnajc5	DnaJ (Hsp40) homolog, subfamily C, member 5	2	181255190	181289838	1	H4	ENSMUSG00000000826	FALSE	(ENSMUSG00000000826 ~ A_endothelial_reference + A_oligodendrocyte_reference) BIC = -119.45	1	FALSE	NA	NA	NA	0.00117104	NA	0.000137674
Tpd52l2	tumor protein D52-like 2	2	181231847	181252671	1	H4	ENSMUSG00000000827	FALSE	(ENSMUSG00000000827 ~ A_endothelial_reference + A_neuron_reference) BIC = -71.47;(ENSMUSG00000000827 ~ A_neuron_reference + A_oligodendrocyte_reference) BIC = -70.43;(ENSMUSG00000000827 ~ A_endothelial_reference + A_microglia_reference + A_neuron_reference) BIC = -69.96;(ENSMUSG00000000827 ~ A_neuron_reference) BIC = -69.93;(ENSMUSG00000000827 ~ A_endothelial_reference + A_neuron_reference + A_ol…	6	TRUE	A_endothelial_reference = 2.0078;A_neuron_reference = 2.0205;A_oligodendrocyte_reference = 1.4849;A_microglia_reference = 1.5863	NA	0.043334	0.137579	0.112662	0.0446604
Fmr1	fragile X mental retardation syndrome 1 homolog	X	65931716	65971138	1	A7.1	ENSMUSG00000000838	FALSE	(ENSMUSG00000000838 ~ A_endothelial_reference + A_microglia_reference + A_neuron_reference) BIC = -59.79;(ENSMUSG00000000838 ~ A_endothelial_reference + A_neuron_reference) BIC = -59.17;(ENSMUSG00000000838 ~ A_endothelial_reference) BIC = -59.04;(ENSMUSG00000000838 ~ A_astrocyte_reference + A_endothelial_reference + A_microglia_reference) BIC = -58.88;(ENSMUSG00000000838 ~ A_microglia_reference +…	7	TRUE	A_endothelial_reference = 2.1908;A_microglia_reference = 1.9377;A_neuron_reference = 1.9063;A_astrocyte_reference = 2.3509;A_oligodendrocyte_reference = 1.4682	0.0187285	0.0566163	0.142037	0.05266	0.0284679
Bcl11a	B cell CLL/lymphoma 11A (zinc finger protein)	11	23978056	24074123	1	A3.2	ENSMUSG00000000861	FALSE	(ENSMUSG00000000861 ~ A_neuron_reference) BIC = -7.33;(ENSMUSG00000000861 ~ A_microglia_reference + A_neuron_reference) BIC = -5.34	2	TRUE	A_neuron_reference = 6.0619;A_microglia_reference = 1.0897	NA	0	NA	0.275859	NA
Pxmp4	peroxisomal membrane protein 4	2	154411494	154429444	-1	H1	ENSMUSG00000000876	FALSE	(ENSMUSG00000000876 ~ A_oligodendrocyte_reference) BIC = -44.13;(ENSMUSG00000000876 ~ A_astrocyte_reference) BIC = -42.16	2	TRUE	A_oligodendrocyte_reference = 2.9758;A_astrocyte_reference = 2.5815	0.00983835	NA	0.00292194	NA	NA
Dlg3	discs, large homolog 3 (Drosophila)	X	97963061	98013749	1	C3	ENSMUSG00000000881	FALSE	(ENSMUSG00000000881 ~ A_endothelial_reference + A_neuron_reference) BIC = -57.7	1	FALSE	NA	NA	2.27262e-07	NA	NA	0.00141611
Gnb1l	guanine nucleotide binding protein (G protein), beta polypeptide 1-like	16	18498861	18566772	1	A3	ENSMUSG00000000884	FALSE	(ENSMUSG00000000884 ~ A_oligodendrocyte_reference) BIC = -27.93;(ENSMUSG00000000884 ~ A_endothelial_reference + A_oligodendrocyte_reference) BIC = -27.49;(ENSMUSG00000000884 ~ A_astrocyte_reference + A_oligodendrocyte_reference) BIC = -27.09;(ENSMUSG00000000884 ~ A_astrocyte_reference + A_endothelial_reference + A_oligodendrocyte_reference) BIC = -26.84	4	TRUE	A_oligodendrocyte_reference = 4.1899;A_endothelial_reference = 1.6075;A_astrocyte_reference = 1.4927	0.135528	NA	2.791e-05	NA	0.107944
Mmp11	matrix metallopeptidase 11	10	75385967	75400678	-1	C1	ENSMUSG00000000901	FALSE	(ENSMUSG00000000901 ~ A_neuron_reference) BIC = -2.57	1	FALSE	NA	NA	4.78852e-07	NA	NA	NA
Smarcb1	SWI/SNF related, matrix associated, actin dependent regulator of chromatin, subfamily b, member 1	10	75359514	75384362	-1	C1	ENSMUSG00000000902	FALSE	(ENSMUSG00000000902 ~ 1) BIC = -74.45;(ENSMUSG00000000902 ~ A_neuron_reference) BIC = -73.63	2	TRUE	A_neuron_reference = 1.5203	NA	0.128447	NA	NA	NA
Hip1r	huntingtin interacting protein 1 related	5	124423637	124453220	1	F	ENSMUSG00000000915	FALSE	(ENSMUSG00000000915 ~ A_endothelial_reference + A_neuron_reference) BIC = -49.72	1	FALSE	NA	NA	6.02223e-09	NA	NA	0.010968
Nsun5	NOL1/NOP2/Sun domain family, member 5	5	135845823	135852675	1	G2	ENSMUSG00000000916	FALSE	(ENSMUSG00000000916 ~ A_endothelial_reference + A_microglia_reference) BIC = -40.43	1	FALSE	NA	NA	NA	NA	0.0102556	0.000438703
Top1mt	DNA topoisomerase 1, mitochondrial	15	75487465	75509230	-1	D3	ENSMUSG00000000934	FALSE	(ENSMUSG00000000934 ~ A_microglia_reference + A_neuron_reference) BIC = -34.43;(ENSMUSG00000000934 ~ A_endothelial_reference + A_microglia_reference + A_neuron_reference) BIC = -32.79	2	TRUE	A_microglia_reference = 2.8825;A_neuron_reference = 3.1102;A_endothelial_reference = 1.1932	NA	0.00186956	NA	0.00394498	0.232772
Snrpn	small nuclear ribonucleoprotein N	7	67127388	67285105	-1	C	ENSMUSG00000000948	FALSE	(ENSMUSG00000000948 ~ A_astrocyte_reference + A_neuron_reference + A_oligodendrocyte_reference) BIC = -50.41;(ENSMUSG00000000948 ~ A_neuron_reference + A_oligodendrocyte_reference) BIC = -48.76;(ENSMUSG00000000948 ~ A_microglia_reference + A_neuron_reference + A_oligodendrocyte_reference) BIC = -48.74	3	TRUE	A_astrocyte_reference = 2.08;A_neuron_reference = 2.922;A_oligodendrocyte_reference = 2.0874;A_microglia_reference = 1.6776	0.0375256	0.00347792	0.0368495	0.0934215	NA
Mmp14	matrix metallopeptidase 14 (membrane-inserted)	14	55050441	55060095	1	C2	ENSMUSG00000000957	FALSE	(ENSMUSG00000000957 ~ A_microglia_reference) BIC = -10.83;(ENSMUSG00000000957 ~ A_endothelial_reference + A_microglia_reference) BIC = -8.92	2	TRUE	A_microglia_reference = 3.6776;A_endothelial_reference = 1.1224	NA	NA	NA	0.00023548	0.261677
Slc7a7	solute carrier family 7 (cationic amino acid transporter, y+ system), member 7	14	54989128	55032856	-1	C2	ENSMUSG00000000958	FALSE	(ENSMUSG00000000958 ~ 1) BIC = 16.85;(ENSMUSG00000000958 ~ A_microglia_reference) BIC = 17.85;(ENSMUSG00000000958 ~ A_oligodendrocyte_reference) BIC = 17.88	3	TRUE	A_microglia_reference = 1.4618;A_oligodendrocyte_reference = 1.4549	NA	NA	0.145695	0.143794	NA
Oxa1l	oxidase assembly 1-like	14	54980525	54989353	1	C2	ENSMUSG00000000959	FALSE	(ENSMUSG00000000959 ~ A_endothelial_reference + A_neuron_reference) BIC = -74.69	1	FALSE	NA	NA	0.00150024	NA	NA	0.00955973
Heatr6	HEAT repeat containing 6	11	83567198	83597256	1	C	ENSMUSG00000000976	FALSE	(ENSMUSG00000000976 ~ A_microglia_reference + A_oligodendrocyte_reference) BIC = -39	1	FALSE	NA	NA	NA	0.00229734	0.518476	NA
Ilf2	interleukin enhancer binding factor 2	3	90280123	90292301	1	F1	ENSMUSG00000001016	FALSE	(ENSMUSG00000001016 ~ A_astrocyte_reference + A_neuron_reference + A_oligodendrocyte_reference) BIC = -81.97;(ENSMUSG00000001016 ~ A_neuron_reference + A_oligodendrocyte_reference) BIC = -81.69	2	TRUE	A_astrocyte_reference = 1.7565;A_neuron_reference = 3.0396;A_oligodendrocyte_reference = 3.7227	0.0790004	0.00236924	0.00019711	NA	NA
2500003M10Rik	RIKEN cDNA 2500003M10 gene	3	90302878	90313420	-1	F1	ENSMUSG00000001017	FALSE	(ENSMUSG00000001017 ~ A_microglia_reference) BIC = -92.57;(ENSMUSG00000001017 ~ A_microglia_reference + A_neuron_reference + A_oligodendrocyte_reference) BIC = -91.29;(ENSMUSG00000001017 ~ A_microglia_reference + A_neuron_reference) BIC = -90.58	3	TRUE	A_microglia_reference = 3.1458;A_neuron_reference = 1.4324;A_oligodendrocyte_reference = 1.8634	NA	0.152021	0.0624051	0.00165657	NA
Snapin	SNAP-associated protein	3	90291948	90294955	-1	F1	ENSMUSG00000001018	FALSE	(ENSMUSG00000001018 ~ A_neuron_reference) BIC = -58.82	1	FALSE	NA	NA	5.50037e-05	NA	NA	NA
S100a4	S100 calcium binding protein A4	3	90407692	90409967	1	F1	ENSMUSG00000001020	FALSE	(ENSMUSG00000001020 ~ 1) BIC = 24.84	1	FALSE	NA	NA	NA	NA	NA	NA
S100a5	S100 calcium binding protein A5	3	90412445	90415702	1	F1	ENSMUSG00000001023	FALSE	(ENSMUSG00000001023 ~ A_microglia_reference) BIC = 121.68;(ENSMUSG00000001023 ~ A_astrocyte_reference) BIC = 122.23;(ENSMUSG00000001023 ~ A_astrocyte_reference + A_endothelial_reference) BIC = 122.41;(ENSMUSG00000001023 ~ A_endothelial_reference + A_microglia_reference) BIC = 122.49;(ENSMUSG00000001023 ~ A_oligodendrocyte_reference) BIC = 122.62;(ENSMUSG00000001023 ~ A_endothelial_reference + A_n…	8	TRUE	A_microglia_reference = 2.018;A_astrocyte_reference = 2.1706;A_endothelial_reference = 1.6456;A_oligodendrocyte_reference = 1.6667;A_neuron_reference = 1.9769	0.0299591	0.0480571	0.0955713	0.0435906	0.099837
S100a6	S100 calcium binding protein A6 (calcyclin)	3	90416816	90418336	1	F1	ENSMUSG00000001025	FALSE	(ENSMUSG00000001025 ~ A_endothelial_reference + A_microglia_reference) BIC = 10.97;(ENSMUSG00000001025 ~ A_astrocyte_reference + A_endothelial_reference + A_microglia_reference) BIC = 12.02;(ENSMUSG00000001025 ~ A_microglia_reference) BIC = 12.56	3	TRUE	A_endothelial_reference = 2.1272;A_microglia_reference = 2.4945;A_astrocyte_reference = 1.3873	0.165346	NA	NA	0.0126135	0.0334005
Icam2	intercellular adhesion molecule 2	11	106238970	106249389	-1	E1	ENSMUSG00000001029	FALSE	(ENSMUSG00000001029 ~ A_endothelial_reference) BIC = 30.13;(ENSMUSG00000001029 ~ A_endothelial_reference + A_neuron_reference) BIC = 30.61	2	TRUE	A_endothelial_reference = 3.807;A_neuron_reference = 1.5887	NA	0.112123	NA	NA	0.00014065
Mapk7	mitogen-activated protein kinase 7	11	61302314	61307908	-1	B2	ENSMUSG00000001034	FALSE	(ENSMUSG00000001034 ~ A_endothelial_reference + A_microglia_reference + A_neuron_reference) BIC = -34.42;(ENSMUSG00000001034 ~ A_endothelial_reference + A_neuron_reference) BIC = -33.95;(ENSMUSG00000001034 ~ A_astrocyte_reference + A_endothelial_reference + A_oligodendrocyte_reference) BIC = -33.27;(ENSMUSG00000001034 ~ A_astrocyte_reference + A_endothelial_reference + A_neuron_reference) BIC = -…	5	TRUE	A_endothelial_reference = 2.472;A_microglia_reference = 1.8024;A_neuron_reference = 3.4149;A_astrocyte_reference = 1.958;A_oligodendrocyte_reference = 2.6291	0.0502299	0.00063816	0.00856024	0.0714778	0.0134349
Epn2	epsin 2	11	61330751	61393187	-1	B2	ENSMUSG00000001036	FALSE	(ENSMUSG00000001036 ~ A_neuron_reference) BIC = -105.77;(ENSMUSG00000001036 ~ A_microglia_reference + A_neuron_reference) BIC = -103.8	2	TRUE	A_neuron_reference = 6.7621;A_microglia_reference = 1.098	NA	0	NA	0.272206	NA
B9d1	B9 protein domain 1	11	61318646	61326433	1	B2	ENSMUSG00000001039	FALSE	(ENSMUSG00000001039 ~ A_astrocyte_reference + A_oligodendrocyte_reference) BIC = -48.7;(ENSMUSG00000001039 ~ A_oligodendrocyte_reference) BIC = -46.71	2	TRUE	A_astrocyte_reference = 2.2033;A_oligodendrocyte_reference = 5.0505	0.0275705	NA	4.41e-07	NA	NA
Sec24b	Sec24 related gene family, member B (S. cerevisiae)	3	129685677	129764471	-1	G3	ENSMUSG00000001052	FALSE	(ENSMUSG00000001052 ~ A_endothelial_reference + A_microglia_reference + A_oligodendrocyte_reference) BIC = -78.45	1	FALSE	NA	NA	NA	0.0102124	0.0571849	0.0204664
N4bp3	NEDD4 binding protein 3	11	51456565	51464344	-1	B1.3	ENSMUSG00000001053	FALSE	(ENSMUSG00000001053 ~ A_endothelial_reference + A_neuron_reference) BIC = -0.4;(ENSMUSG00000001053 ~ A_endothelial_reference + A_neuron_reference + A_oligodendrocyte_reference) BIC = 0.5;(ENSMUSG00000001053 ~ A_endothelial_reference + A_oligodendrocyte_reference) BIC = 0.97;(ENSMUSG00000001053 ~ A_astrocyte_reference + A_endothelial_reference + A_oligodendrocyte_reference) BIC = 1.42	4	TRUE	A_endothelial_reference = 2.8286;A_neuron_reference = 2.5936;A_oligodendrocyte_reference = 2.0135;A_astrocyte_reference = 1.5631	0.118019	0.00949653	0.0440663	NA	0.00467517
Rmnd5b	required for meiotic nuclear division 5 homolog B (S. cerevisiae)	11	51437173	51449398	-1	B1.3	ENSMUSG00000001054	FALSE	(ENSMUSG00000001054 ~ A_oligodendrocyte_reference) BIC = -65.78;(ENSMUSG00000001054 ~ A_endothelial_reference + A_oligodendrocyte_reference) BIC = -64.91	2	TRUE	A_oligodendrocyte_reference = 7.2774;A_endothelial_reference = 1.4738	NA	NA	0	NA	0.140548
Nhp2	NHP2 ribonucleoprotein homolog (yeast)	11	51433237	51437216	1	B1.3	ENSMUSG00000001056	FALSE	(ENSMUSG00000001056 ~ A_endothelial_reference + A_oligodendrocyte_reference) BIC = -32.14;(ENSMUSG00000001056 ~ A_endothelial_reference + A_microglia_reference + A_oligodendrocyte_reference) BIC = -30.52;(ENSMUSG00000001056 ~ A_oligodendrocyte_reference) BIC = -30.28	3	TRUE	A_endothelial_reference = 2.2151;A_oligodendrocyte_reference = 4.5125;A_microglia_reference = 1.2016	NA	NA	6.41e-06	0.229529	0.0267554
1300018I17Rik	RIKEN cDNA 1300018I17 gene	8	125766256	125778248	-1	E1	ENSMUSG00000001062	FALSE	(ENSMUSG00000001062 ~ A_endothelial_reference + A_microglia_reference + A_neuron_reference) BIC = -58.5;(ENSMUSG00000001062 ~ A_endothelial_reference + A_microglia_reference + A_oligodendrocyte_reference) BIC = -57.76;(ENSMUSG00000001062 ~ A_astrocyte_reference + A_endothelial_reference + A_microglia_reference) BIC = -56.68;(ENSMUSG00000001062 ~ A_astrocyte_reference + A_endothelial_reference + A…	4	TRUE	A_endothelial_reference = 3.1484;A_microglia_reference = 2.6446;A_neuron_reference = 2.5119;A_oligodendrocyte_reference = 2.0104;A_astrocyte_reference = 1.6335	0.102367	0.0120093	0.0443868	0.00817976	0.00164194
Zfp276	zinc finger protein (C2H2 type) 276	8	125778095	125793645	1	E1	ENSMUSG00000001065	FALSE	(ENSMUSG00000001065 ~ A_endothelial_reference + A_oligodendrocyte_reference) BIC = -41.74;(ENSMUSG00000001065 ~ A_neuron_reference) BIC = -41.35;(ENSMUSG00000001065 ~ A_oligodendrocyte_reference) BIC = -41.11;(ENSMUSG00000001065 ~ A_endothelial_reference + A_microglia_reference + A_oligodendrocyte_reference) BIC = -40.12;(ENSMUSG00000001065 ~ A_microglia_reference + A_oligodendrocyte_reference) B…	5	TRUE	A_endothelial_reference = 1.8331;A_oligodendrocyte_reference = 3.1655;A_neuron_reference = 3.1057;A_microglia_reference = 1.2778	NA	0.0018981	0.00154792	0.201305	0.066789
Mfsd10	major facilitator superfamily domain containing 10	5	34976291	34979861	-1	B2	ENSMUSG00000001082	FALSE	(ENSMUSG00000001082 ~ A_astrocyte_reference + A_endothelial_reference + A_microglia_reference) BIC = -38.85	1	FALSE	NA	4.62333e-07	NA	NA	0.0181652	0.00326996
Luzp1	leucine zipper protein 1	4	136025676	136110695	1	D3	ENSMUSG00000001089	FALSE	(ENSMUSG00000001089 ~ A_astrocyte_reference + A_endothelial_reference + A_oligodendrocyte_reference) BIC = -36.96;(ENSMUSG00000001089 ~ A_endothelial_reference + A_neuron_reference + A_oligodendrocyte_reference) BIC = -35.46;(ENSMUSG00000001089 ~ A_astrocyte_reference + A_endothelial_reference + A_neuron_reference + A_oligodendrocyte_reference) BIC = -35.29	3	TRUE	A_astrocyte_reference = 2.2025;A_endothelial_reference = 2.5788;A_oligodendrocyte_reference = 3.9237;A_neuron_reference = 1.5809	0.0276278	0.113904	8.72e-05	NA	0.00991459
Kctd10	potassium channel tetramerisation domain containing 10	5	114813576	114830524	-1	F	ENSMUSG00000001098	FALSE	(ENSMUSG00000001098 ~ A_microglia_reference + A_neuron_reference + A_oligodendrocyte_reference) BIC = -74.55;(ENSMUSG00000001098 ~ A_microglia_reference + A_oligodendrocyte_reference) BIC = -74.24;(ENSMUSG00000001098 ~ A_oligodendrocyte_reference) BIC = -74.05;(ENSMUSG00000001098 ~ A_neuron_reference + A_oligodendrocyte_reference) BIC = -72.76;(ENSMUSG00000001098 ~ A_astrocyte_reference + A_micro…	5	TRUE	A_microglia_reference = 1.9222;A_neuron_reference = 1.6179;A_oligodendrocyte_reference = 4.8456;A_astrocyte_reference = 1.1841	0.236356	0.105688	1.26e-06	0.0545815	NA
Poldip2	polymerase (DNA-directed), delta interacting protein 2	11	78325695	78336238	1	B5	ENSMUSG00000001100	FALSE	(ENSMUSG00000001100 ~ A_astrocyte_reference + A_neuron_reference + A_oligodendrocyte_reference) BIC = -71.34;(ENSMUSG00000001100 ~ A_endothelial_reference + A_neuron_reference + A_oligodendrocyte_reference) BIC = -71.19;(ENSMUSG00000001100 ~ A_neuron_reference + A_oligodendrocyte_reference) BIC = -70.68;(ENSMUSG00000001100 ~ A_astrocyte_reference + A_endothelial_reference + A_neuron_reference + A…	5	TRUE	A_astrocyte_reference = 1.6815;A_neuron_reference = 2.3387;A_oligodendrocyte_reference = 2.2232;A_endothelial_reference = 1.7496	0.0926589	0.0193505	0.0262027	NA	0.0801925
Sebox	SEBOX homeobox	11	78316951	78318583	1	B5	ENSMUSG00000001103	FALSE	(ENSMUSG00000001103 ~ A_neuron_reference) BIC = 48.01;(ENSMUSG00000001103 ~ A_endothelial_reference + A_neuron_reference) BIC = 48.49	2	TRUE	A_neuron_reference = 2.3348;A_endothelial_reference = 1.5886	NA	0.0195538	NA	NA	0.112141
Ift20	intraflagellar transport 20 homolog (Chlamydomonas)	11	78349863	78355239	1	B5	ENSMUSG00000001105	FALSE	(ENSMUSG00000001105 ~ A_neuron_reference + A_oligodendrocyte_reference) BIC = -39.52;(ENSMUSG00000001105 ~ A_astrocyte_reference + A_neuron_reference + A_oligodendrocyte_reference) BIC = -39.52;(ENSMUSG00000001105 ~ A_endothelial_reference + A_oligodendrocyte_reference) BIC = -39.44;(ENSMUSG00000001105 ~ A_endothelial_reference) BIC = -39.33;(ENSMUSG00000001105 ~ A_endothelial_reference + A_neuro…	8	TRUE	A_neuron_reference = 1.9051;A_oligodendrocyte_reference = 1.9383;A_astrocyte_reference = 1.4398;A_endothelial_reference = 1.7887	0.14991	0.0567684	0.0525926	NA	0.0736645
Col6a1	collagen, type VI, alpha 1	10	76171537	76188913	-1	C1	ENSMUSG00000001119	FALSE	(ENSMUSG00000001119 ~ A_endothelial_reference + A_microglia_reference) BIC = -0.24;(ENSMUSG00000001119 ~ A_endothelial_reference) BIC = 0.65;(ENSMUSG00000001119 ~ A_astrocyte_reference + A_endothelial_reference) BIC = 1.05;(ENSMUSG00000001119 ~ A_microglia_reference) BIC = 1.12;(ENSMUSG00000001119 ~ A_endothelial_reference + A_neuron_reference) BIC = 1.71	5	TRUE	A_endothelial_reference = 2.2199;A_microglia_reference = 2.0339;A_astrocyte_reference = 1.6097;A_neuron_reference = 1.414	0.107456	0.157348	NA	0.0419601	0.0264279
Pcbp3	poly(rC) binding protein 3	10	76224602	76424632	-1	C1	ENSMUSG00000001120	FALSE	(ENSMUSG00000001120 ~ A_neuron_reference) BIC = -52.06;(ENSMUSG00000001120 ~ A_microglia_reference + A_neuron_reference) BIC = -51.53;(ENSMUSG00000001120 ~ A_neuron_reference + A_oligodendrocyte_reference) BIC = -50.38;(ENSMUSG00000001120 ~ A_endothelial_reference + A_neuron_reference) BIC = -50.07	4	TRUE	A_neuron_reference = 3.6655;A_microglia_reference = 1.5725;A_oligodendrocyte_reference = 1.2079;A_endothelial_reference = 1.0915	NA	0.00024689	0.227094	0.115841	0.27504
Lgals9	lectin, galactose binding, soluble 9	11	78776476	78798448	-1	B5	ENSMUSG00000001123	FALSE	(ENSMUSG00000001123 ~ A_endothelial_reference + A_neuron_reference) BIC = -26.82;(ENSMUSG00000001123 ~ A_astrocyte_reference + A_endothelial_reference + A_neuron_reference) BIC = -25.04	2	TRUE	A_endothelial_reference = 3.5692;A_neuron_reference = 2.7129;A_astrocyte_reference = 1.1469	0.251425	0.0066693	NA	NA	0.00035801
Araf	v-raf murine sarcoma 3611 viral oncogene homolog	X	20374940	20437645	1	A1.3	ENSMUSG00000001127	FALSE	(ENSMUSG00000001127 ~ A_microglia_reference + A_neuron_reference) BIC = -48.76;(ENSMUSG00000001127 ~ A_endothelial_reference + A_microglia_reference + A_neuron_reference) BIC = -47.36	2	TRUE	A_microglia_reference = 2.382;A_neuron_reference = 3.8049;A_endothelial_reference = 1.2756	NA	0.00014183	NA	0.0172206	0.202092
Cfp	complement factor properdin	X	20502580	20508681	-1	A1.3	ENSMUSG00000001128	FALSE	(ENSMUSG00000001128 ~ 1) BIC = -16.93;(ENSMUSG00000001128 ~ A_microglia_reference) BIC = -15.73	2	TRUE	A_microglia_reference = 1.397	NA	NA	NA	0.162406	NA
Uxt	ubiquitously expressed transcript	X	20518848	20539143	-1	A1.3	ENSMUSG00000001134	FALSE	(ENSMUSG00000001134 ~ 1) BIC = -22.24;(ENSMUSG00000001134 ~ A_astrocyte_reference) BIC = -21.54;(ENSMUSG00000001134 ~ A_oligodendrocyte_reference) BIC = -20.84;(ENSMUSG00000001134 ~ A_neuron_reference) BIC = -20.69	4	TRUE	A_astrocyte_reference = 1.5546;A_oligodendrocyte_reference = 1.3311;A_neuron_reference = 1.2788	0.120048	0.200952	0.183146	NA	NA
Cnnm3	cyclin M3	1	36568712	36585082	1	B	ENSMUSG00000001138	FALSE	(ENSMUSG00000001138 ~ A_microglia_reference) BIC = -54.55	1	FALSE	NA	NA	NA	NA	0.0119714	NA
Lman2l	lectin, mannose-binding 2-like	1	36478910	36502116	-1	B	ENSMUSG00000001143	FALSE	(ENSMUSG00000001143 ~ A_astrocyte_reference + A_neuron_reference) BIC = -34.33;(ENSMUSG00000001143 ~ A_astrocyte_reference + A_endothelial_reference + A_neuron_reference) BIC = -33.53	2	TRUE	A_astrocyte_reference = 3.0407;A_neuron_reference = 4.2079;A_endothelial_reference = 1.4608	0.00236019	2.577e-05	NA	NA	0.144068
Mcm3ap	minichromosome maintenance deficient 3 (S. cerevisiae) associated protein	10	75931672	75978601	1	C1	ENSMUSG00000001150	FALSE	(ENSMUSG00000001150 ~ 1) BIC = -76.87;(ENSMUSG00000001150 ~ A_microglia_reference) BIC = -75.6	2	TRUE	A_microglia_reference = 1.3751	NA	NA	NA	0.169114	NA
Pcnt	pericentrin (kendrin)	10	75813999	75905657	-1	C1	ENSMUSG00000001151	FALSE	(ENSMUSG00000001151 ~ A_endothelial_reference) BIC = -61.37	1	FALSE	NA	NA	NA	NA	NA	0.00607568
Mxd1	MAX dimerization protein 1	6	86597038	86619153	-1	D1	ENSMUSG00000001156	FALSE	(ENSMUSG00000001156 ~ A_endothelial_reference + A_oligodendrocyte_reference) BIC = -25.66;(ENSMUSG00000001156 ~ A_neuron_reference) BIC = -25.62;(ENSMUSG00000001156 ~ A_endothelial_reference + A_neuron_reference + A_oligodendrocyte_reference) BIC = -24.3;(ENSMUSG00000001156 ~ A_astrocyte_reference + A_endothelial_reference + A_oligodendrocyte_reference) BIC = -24.22;(ENSMUSG00000001156 ~ A_neuron…	5	TRUE	A_endothelial_reference = 2.0959;A_oligodendrocyte_reference = 2.2061;A_neuron_reference = 2.0725;A_astrocyte_reference = 1.2627	0.206702	0.0382175	0.0273782	NA	0.0360899
Gmcl1	germ cell-less homolog 1 (Drosophila)	6	86641762	86683372	-1	D1	ENSMUSG00000001157	FALSE	(ENSMUSG00000001157 ~ A_oligodendrocyte_reference) BIC = -63.27;(ENSMUSG00000001157 ~ A_neuron_reference) BIC = -62.41;(ENSMUSG00000001157 ~ A_neuron_reference + A_oligodendrocyte_reference) BIC = -61.62	3	TRUE	A_oligodendrocyte_reference = 2.4381;A_neuron_reference = 1.9321	NA	0.0533515	0.0147665	NA	NA
Snrnp27	small nuclear ribonucleoprotein 27 (U4/U6.U5)	6	86625215	86634516	-1	D1	ENSMUSG00000001158	FALSE	(ENSMUSG00000001158 ~ A_endothelial_reference) BIC = -50.43;(ENSMUSG00000001158 ~ A_astrocyte_reference + A_endothelial_reference) BIC = -49.35	2	TRUE	A_endothelial_reference = 2.5706;A_astrocyte_reference = 1.4071	0.15941	NA	NA	NA	0.0101514
Oas1c	2'-5' oligoadenylate synthetase 1C	5	121250102	121262523	-1	F	ENSMUSG00000001166	FALSE	(ENSMUSG00000001166 ~ A_neuron_reference) BIC = 31.6;(ENSMUSG00000001166 ~ A_astrocyte_reference + A_neuron_reference) BIC = 32.66	2	TRUE	A_neuron_reference = 3.4906;A_astrocyte_reference = 1.4118	0.158016	0.00048195	NA	NA	NA
Ocrl	oculocerebrorenal syndrome of Lowe	X	45265564	45319045	1	A4	ENSMUSG00000001173	FALSE	(ENSMUSG00000001173 ~ A_endothelial_reference) BIC = -52.02;(ENSMUSG00000001173 ~ A_endothelial_reference + A_microglia_reference + A_oligodendrocyte_reference) BIC = -51.4;(ENSMUSG00000001173 ~ A_endothelial_reference + A_microglia_reference) BIC = -50.04	3	TRUE	A_endothelial_reference = 2.6559;A_microglia_reference = 1.5501;A_oligodendrocyte_reference = 2.0174	NA	NA	0.0436563	0.121119	0.00791051
Calm1	calmodulin 1	12	101437645	101448016	1	E	ENSMUSG00000001175	FALSE	(ENSMUSG00000001175 ~ A_oligodendrocyte_reference) BIC = -68.06;(ENSMUSG00000001175 ~ A_microglia_reference + A_oligodendrocyte_reference) BIC = -66.89	2	TRUE	A_oligodendrocyte_reference = 4.4816;A_microglia_reference = 1.3794	NA	NA	7.41e-06	0.167776	NA
Agpat3	1-acylglycerol-3-phosphate O-acyltransferase 3	10	77731923	77815234	-1	C1	ENSMUSG00000001211	FALSE	(ENSMUSG00000001211 ~ A_neuron_reference) BIC = -97.01;(ENSMUSG00000001211 ~ A_endothelial_reference + A_neuron_reference) BIC = -95.78	2	TRUE	A_neuron_reference = 8.3384;A_endothelial_reference = 1.3591	NA	0	NA	NA	0.174117
Sema6b	sema domain, transmembrane domain (TM), and cytoplasmic domain, (semaphorin) 6B	17	56262508	56279766	-1	D	ENSMUSG00000001227	FALSE	(ENSMUSG00000001227 ~ A_astrocyte_reference + A_oligodendrocyte_reference) BIC = -56.98;(ENSMUSG00000001227 ~ A_neuron_reference + A_oligodendrocyte_reference) BIC = -55.41;(ENSMUSG00000001227 ~ A_oligodendrocyte_reference) BIC = -55.36;(ENSMUSG00000001227 ~ A_microglia_reference + A_oligodendrocyte_reference) BIC = -55.36	4	TRUE	A_astrocyte_reference = 2.1169;A_oligodendrocyte_reference = 4.2395;A_neuron_reference = 1.7326;A_microglia_reference = 1.7184	0.0342642	0.0831709	2.241e-05	0.0857151	NA
Uhrf1	ubiquitin-like, containing PHD and RING finger domains, 1	17	56442744	56462909	1	D	ENSMUSG00000001228	FALSE	(ENSMUSG00000001228 ~ 1) BIC = 2.3;(ENSMUSG00000001228 ~ A_endothelial_reference) BIC = 4.01;(ENSMUSG00000001228 ~ A_neuron_reference) BIC = 4.09	3	TRUE	A_endothelial_reference = 1.2203;A_neuron_reference = 1.1899	NA	0.234077	NA	NA	0.222352
Dpp9	dipeptidylpeptidase 9	17	56326105	56358312	-1	D	ENSMUSG00000001229	FALSE	(ENSMUSG00000001229 ~ 1) BIC = -72.75;(ENSMUSG00000001229 ~ A_microglia_reference) BIC = -72;(ENSMUSG00000001229 ~ A_astrocyte_reference + A_microglia_reference) BIC = -71.47	3	TRUE	A_microglia_reference = 1.5787;A_astrocyte_reference = 1.573	0.115727	NA	NA	0.114397	NA
Ramp2	receptor (calcitonin) activity modifying protein 2	11	101107342	101120860	1	D	ENSMUSG00000001240	FALSE	(ENSMUSG00000001240 ~ A_endothelial_reference + A_neuron_reference) BIC = -16.17;(ENSMUSG00000001240 ~ A_oligodendrocyte_reference) BIC = -16.15;(ENSMUSG00000001240 ~ A_astrocyte_reference + A_oligodendrocyte_reference) BIC = -14.32;(ENSMUSG00000001240 ~ A_endothelial_reference + A_oligodendrocyte_reference) BIC = -14.31;(ENSMUSG00000001240 ~ A_neuron_reference) BIC = -14.23	5	TRUE	A_endothelial_reference = 1.7297;A_neuron_reference = 3.8007;A_oligodendrocyte_reference = 3.2292;A_astrocyte_reference = 1.1518	0.249411	0.00014429	0.00124127	NA	0.0836845
Lsr	lipolysis stimulated lipoprotein receptor	7	31742428	31768188	-1	B1	ENSMUSG00000001247	FALSE	(ENSMUSG00000001247 ~ A_endothelial_reference + A_neuron_reference) BIC = 1.44;(ENSMUSG00000001247 ~ A_endothelial_reference + A_microglia_reference) BIC = 1.72;(ENSMUSG00000001247 ~ A_endothelial_reference) BIC = 2.01;(ENSMUSG00000001247 ~ A_endothelial_reference + A_oligodendrocyte_reference) BIC = 2.88;(ENSMUSG00000001247 ~ A_astrocyte_reference + A_endothelial_reference) BIC = 3.13	5	TRUE	A_endothelial_reference = 4.7781;A_neuron_reference = 1.8659;A_microglia_reference = 1.7953;A_oligodendrocyte_reference = 1.4719;A_astrocyte_reference = 1.3954	0.162881	0.062054	0.141057	0.0726076	1.77e-06
Gramd1a	GRAM domain containing 1A	7	31915146	31936069	-1	B1	ENSMUSG00000001248	FALSE	(ENSMUSG00000001248 ~ A_endothelial_reference + A_microglia_reference) BIC = -59.88	1	FALSE	NA	NA	NA	NA	0.000485	0.00152992
Hpn	hepsin	7	31883744	31900309	-1	B1	ENSMUSG00000001249	FALSE	(ENSMUSG00000001249 ~ A_microglia_reference) BIC = 17.91;(ENSMUSG00000001249 ~ A_astrocyte_reference + A_microglia_reference) BIC = 17.97;(ENSMUSG00000001249 ~ A_microglia_reference + A_neuron_reference) BIC = 18.3;(ENSMUSG00000001249 ~ 1) BIC = 18.32;(ENSMUSG00000001249 ~ A_microglia_reference + A_oligodendrocyte_reference) BIC = 18.67;(ENSMUSG00000001249 ~ A_endothelial_reference) BIC = 18.93;(…	9	TRUE	A_microglia_reference = 1.9884;A_astrocyte_reference = 1.7087;A_neuron_reference = 1.6125;A_oligodendrocyte_reference = 1.5878;A_endothelial_reference = 1.3831	0.0874993	0.10685	0.112341	0.046762	0.16662
Gabrg1	gamma-aminobutyric acid (GABA) A receptor, subunit gamma 1	5	71142286	71233856	-1	C3.1	ENSMUSG00000001260	FALSE	(ENSMUSG00000001260 ~ A_endothelial_reference + A_microglia_reference + A_neuron_reference) BIC = -18.41;(ENSMUSG00000001260 ~ 1) BIC = -18.27;(ENSMUSG00000001260 ~ A_microglia_reference + A_neuron_reference) BIC = -18.13;(ENSMUSG00000001260 ~ A_neuron_reference) BIC = -17.62;(ENSMUSG00000001260 ~ A_microglia_reference + A_oligodendrocyte_reference) BIC = -17.39;(ENSMUSG00000001260 ~ A_oligodendr…	6	TRUE	A_endothelial_reference = 1.7576;A_microglia_reference = 1.9897;A_neuron_reference = 2.0438;A_oligodendrocyte_reference = 1.6339	NA	0.0409729	0.102286	0.0466249	0.0788157
Ckb	creatine kinase, brain	12	112907566	112910549	-1	F1	ENSMUSG00000001270	FALSE	(ENSMUSG00000001270 ~ A_endothelial_reference + A_neuron_reference) BIC = -32.02;(ENSMUSG00000001270 ~ A_astrocyte_reference + A_endothelial_reference + A_neuron_reference) BIC = -30.31	2	TRUE	A_endothelial_reference = 3.4647;A_neuron_reference = 7.278;A_astrocyte_reference = 1.1704	0.241831	0	NA	NA	0.00053084
Sp1	trans-acting transcription factor 1	15	102236574	102266835	1	F3	ENSMUSG00000001280	FALSE	(ENSMUSG00000001280 ~ A_oligodendrocyte_reference) BIC = -53.33	1	FALSE	NA	NA	NA	7.02559e-07	NA	NA
Myg1	melanocyte proliferating gene 1	15	102162140	102168570	1	F3	ENSMUSG00000001285	FALSE	(ENSMUSG00000001285 ~ A_endothelial_reference) BIC = -66.34;(ENSMUSG00000001285 ~ A_endothelial_reference + A_microglia_reference) BIC = -64.73	2	TRUE	A_endothelial_reference = 2.7115;A_microglia_reference = 1.2294	NA	NA	NA	0.21891	0.00669856
Rarg	retinoic acid receptor, gamma	15	102065369	102087948	-1	F3	ENSMUSG00000001288	FALSE	(ENSMUSG00000001288 ~ A_astrocyte_reference + A_endothelial_reference) BIC = -26.17	1	FALSE	NA	0.041425	NA	NA	NA	5.13959e-06
Pfdn5	prefoldin 5	15	102156547	102162304	1	F3	ENSMUSG00000001289	FALSE	(ENSMUSG00000001289 ~ A_endothelial_reference + A_neuron_reference + A_oligodendrocyte_reference) BIC = -40.62;(ENSMUSG00000001289 ~ A_endothelial_reference) BIC = -40.19;(ENSMUSG00000001289 ~ A_neuron_reference + A_oligodendrocyte_reference) BIC = -40	3	TRUE	A_endothelial_reference = 2.0533;A_neuron_reference = 2.6741;A_oligodendrocyte_reference = 2.3762	NA	0.00749285	0.0174935	NA	0.0400442
Efnb2	ephrin B2	8	8617434	8661239	-1	A1.1	ENSMUSG00000001300	FALSE	(ENSMUSG00000001300 ~ A_microglia_reference) BIC = -43.56;(ENSMUSG00000001300 ~ A_endothelial_reference + A_microglia_reference) BIC = -42.19	2	TRUE	A_microglia_reference = 2.5841;A_endothelial_reference = 1.3116	NA	NA	NA	0.00976288	0.189661
Rrp15	ribosomal RNA processing 15 homolog (S. cerevisiae)	1	188544857	188573237	-1	H5	ENSMUSG00000001305	FALSE	(ENSMUSG00000001305 ~ A_astrocyte_reference + A_microglia_reference) BIC = -45.71;(ENSMUSG00000001305 ~ A_astrocyte_reference + A_endothelial_reference + A_microglia_reference) BIC = -44.6	2	TRUE	A_astrocyte_reference = 2.6741;A_microglia_reference = 2.7661;A_endothelial_reference = 1.3716	0.00749282	NA	NA	0.00567331	0.170193
Rnd2	Rho family GTPase 2	11	101326313	101333167	1	D	ENSMUSG00000001313	FALSE	(ENSMUSG00000001313 ~ A_neuron_reference + A_oligodendrocyte_reference) BIC = -50.8;(ENSMUSG00000001313 ~ A_endothelial_reference + A_neuron_reference + A_oligodendrocyte_reference) BIC = -50.34	2	TRUE	A_neuron_reference = 4.22;A_oligodendrocyte_reference = 2.7543;A_endothelial_reference = 1.5618	NA	2.443e-05	0.00588164	NA	0.118341
Srr	serine racemase	11	74719861	74739450	-1	B5	ENSMUSG00000001323	FALSE	(ENSMUSG00000001323 ~ A_endothelial_reference + A_neuron_reference) BIC = -60.79;(ENSMUSG00000001323 ~ A_endothelial_reference + A_microglia_reference + A_neuron_reference) BIC = -59.3	2	TRUE	A_endothelial_reference = 2.5718;A_neuron_reference = 5.7684;A_microglia_reference = 1.2485	NA	1e-08	NA	0.211832	0.0101164
Sync	syncoilin	4	128964861	128985803	1	D2.2	ENSMUSG00000001333	FALSE	(ENSMUSG00000001333 ~ A_neuron_reference) BIC = 29.3;(ENSMUSG00000001333 ~ A_endothelial_reference + A_neuron_reference) BIC = 30.19;(ENSMUSG00000001333 ~ A_neuron_reference + A_oligodendrocyte_reference) BIC = 30.55	3	TRUE	A_neuron_reference = 4.1687;A_endothelial_reference = 1.4658;A_oligodendrocyte_reference = 1.3542	NA	3.063e-05	0.175667	NA	0.142705
Fndc5	fibronectin type III domain containing 5	4	128814243	128821837	1	D2.2	ENSMUSG00000001334	FALSE	(ENSMUSG00000001334 ~ A_neuron_reference) BIC = -2.58;(ENSMUSG00000001334 ~ A_endothelial_reference + A_neuron_reference + A_oligodendrocyte_reference) BIC = -2.35;(ENSMUSG00000001334 ~ A_endothelial_reference + A_neuron_reference) BIC = -1.17;(ENSMUSG00000001334 ~ A_neuron_reference + A_oligodendrocyte_reference) BIC = -0.85	4	TRUE	A_neuron_reference = 5.5732;A_endothelial_reference = 1.6689;A_oligodendrocyte_reference = 1.6116	NA	3e-08	0.107052	NA	0.0951369
Cnn1	calponin 1	9	21903725	21914074	1	A3	ENSMUSG00000001349	FALSE	(ENSMUSG00000001349 ~ A_endothelial_reference + A_microglia_reference + A_oligodendrocyte_reference) BIC = 87.79;(ENSMUSG00000001349 ~ A_endothelial_reference + A_microglia_reference) BIC = 89.14;(ENSMUSG00000001349 ~ A_endothelial_reference + A_microglia_reference + A_neuron_reference) BIC = 89.68	3	TRUE	A_endothelial_reference = 2.2967;A_microglia_reference = 2.9827;A_oligodendrocyte_reference = 2.0149;A_neuron_reference = 1.5373	NA	0.124219	0.0439192	0.00285726	0.0216366
Fbxo9	f-box protein 9	9	77929306	77956872	-1	E1	ENSMUSG00000001366	FALSE	(ENSMUSG00000001366 ~ A_neuron_reference) BIC = -67.34;(ENSMUSG00000001366 ~ A_neuron_reference + A_oligodendrocyte_reference) BIC = -67.21;(ENSMUSG00000001366 ~ A_astrocyte_reference + A_neuron_reference) BIC = -67.21;(ENSMUSG00000001366 ~ A_astrocyte_reference + A_neuron_reference + A_oligodendrocyte_reference) BIC = -66.63;(ENSMUSG00000001366 ~ A_microglia_reference + A_neuron_reference) BIC =…	5	TRUE	A_neuron_reference = 2.1503;A_oligodendrocyte_reference = 1.6109;A_astrocyte_reference = 1.6105;A_microglia_reference = 1.4635	0.107286	0.031534	0.107201	0.143341	NA
Ccdc132	coiled-coil domain containing 132	6	3448382	3553319	1	A1	ENSMUSG00000001376	FALSE	(ENSMUSG00000001376 ~ A_neuron_reference) BIC = -58.2;(ENSMUSG00000001376 ~ A_endothelial_reference + A_neuron_reference) BIC = -56.91;(ENSMUSG00000001376 ~ 1) BIC = -56.7	3	TRUE	A_neuron_reference = 2.1336;A_endothelial_reference = 1.3414	NA	0.0328788	NA	NA	0.179799
Apbb3	amyloid beta (A4) precursor protein-binding, family B, member 3	18	36830814	36839020	-1	B2	ENSMUSG00000001379	FALSE	(ENSMUSG00000001379 ~ A_endothelial_reference + A_microglia_reference) BIC = -59.45;(ENSMUSG00000001379 ~ A_microglia_reference) BIC = -58.89;(ENSMUSG00000001379 ~ A_microglia_reference + A_neuron_reference) BIC = -58.01;(ENSMUSG00000001379 ~ A_endothelial_reference + A_microglia_reference + A_neuron_reference) BIC = -57.89	4	TRUE	A_endothelial_reference = 1.7915;A_microglia_reference = 3.105;A_neuron_reference = 1.3381	NA	0.180864	NA	0.00190283	0.0732147
Hars	histidyl-tRNA synthetase	18	36926184	36942859	-1	B2	ENSMUSG00000001380	FALSE	(ENSMUSG00000001380 ~ A_oligodendrocyte_reference) BIC = -75.45	1	FALSE	NA	NA	NA	0.00121952	NA	NA
Zmat2	zinc finger, matrin type 2	18	36953577	36959314	1	B2	ENSMUSG00000001383	FALSE	(ENSMUSG00000001383 ~ A_astrocyte_reference + A_microglia_reference + A_oligodendrocyte_reference) BIC = -52.63;(ENSMUSG00000001383 ~ A_astrocyte_reference + A_oligodendrocyte_reference) BIC = -51.98;(ENSMUSG00000001383 ~ A_oligodendrocyte_reference) BIC = -51.95	3	TRUE	A_astrocyte_reference = 1.961;A_microglia_reference = 1.8485;A_oligodendrocyte_reference = 3.9893	0.0498848	NA	6.626e-05	0.0645302	NA
Smg5	Smg-5 homolog, nonsense mediated mRNA decay factor (C. elegans)	3	88140182	88166259	1	F1	ENSMUSG00000001415	FALSE	(ENSMUSG00000001415 ~ A_endothelial_reference + A_neuron_reference) BIC = -60.62;(ENSMUSG00000001415 ~ A_endothelial_reference + A_neuron_reference + A_oligodendrocyte_reference) BIC = -59.06	2	TRUE	A_endothelial_reference = 2.4352;A_neuron_reference = 5.4155;A_oligodendrocyte_reference = 1.2262	NA	6e-08	0.220142	NA	0.0148846
Cct3	chaperonin containing Tcp1, subunit 3 (gamma)	3	88101038	88125689	1	F1	ENSMUSG00000001416	FALSE	(ENSMUSG00000001416 ~ A_astrocyte_reference + A_neuron_reference) BIC = -79.47;(ENSMUSG00000001416 ~ A_astrocyte_reference) BIC = -78.97;(ENSMUSG00000001416 ~ A_astrocyte_reference + A_endothelial_reference) BIC = -78.86;(ENSMUSG00000001416 ~ A_astrocyte_reference + A_endothelial_reference + A_neuron_reference) BIC = -78.36	4	TRUE	A_astrocyte_reference = 2.9758;A_neuron_reference = 1.7218;A_endothelial_reference = 1.5303	0.00292221	0.0851049	NA	NA	0.12594
0610031J06Rik	RIKEN cDNA 0610031J06 gene	3	88128945	88135235	1	F1	ENSMUSG00000001418	FALSE	(ENSMUSG00000001418 ~ A_endothelial_reference) BIC = -72.9	1	FALSE	NA	NA	NA	NA	NA	0.00104294
Mef2d	myocyte enhancer factor 2D	3	87946294	87976008	1	F1	ENSMUSG00000001419	FALSE	(ENSMUSG00000001419 ~ A_microglia_reference + A_neuron_reference) BIC = -70.82;(ENSMUSG00000001419 ~ A_astrocyte_reference + A_oligodendrocyte_reference) BIC = -69.96;(ENSMUSG00000001419 ~ A_endothelial_reference + A_microglia_reference + A_neuron_reference) BIC = -69.83;(ENSMUSG00000001419 ~ A_microglia_reference + A_neuron_reference + A_oligodendrocyte_reference) BIC = -69.02;(ENSMUSG0000000141…	5	TRUE	A_microglia_reference = 2.3396;A_neuron_reference = 2.7491;A_astrocyte_reference = 2.6214;A_oligodendrocyte_reference = 1.9078;A_endothelial_reference = 1.4081	0.00875653	0.00597652	0.056411	0.0193046	0.159105
Snd1	staphylococcal nuclease and tudor domain containing 1	6	28425139	28885162	1	A3.3	ENSMUSG00000001424	FALSE	(ENSMUSG00000001424 ~ A_oligodendrocyte_reference) BIC = -71.5;(ENSMUSG00000001424 ~ A_astrocyte_reference + A_oligodendrocyte_reference) BIC = -69.84	2	TRUE	A_oligodendrocyte_reference = 2.5407;A_astrocyte_reference = 1.2152	0.224292	NA	0.0110637	NA	NA
Col18a1	collagen, type XVIII, alpha 1	10	76514923	76629293	-1	C1	ENSMUSG00000001435	FALSE	(ENSMUSG00000001435 ~ A_astrocyte_reference) BIC = 47.96;(ENSMUSG00000001435 ~ 1) BIC = 48.81;(ENSMUSG00000001435 ~ A_microglia_reference) BIC = 49.04;(ENSMUSG00000001435 ~ A_neuron_reference) BIC = 49.34;(ENSMUSG00000001435 ~ A_oligodendrocyte_reference) BIC = 49.78	5	TRUE	A_astrocyte_reference = 1.9757;A_microglia_reference = 1.6886;A_neuron_reference = 1.6025;A_oligodendrocyte_reference = 1.4712	0.0481931	0.109043	0.141231	0.0912883	NA
Slc19a1	solute carrier family 19 (folate transporter), member 1	10	76494986	76523747	1	C1	ENSMUSG00000001436	FALSE	(ENSMUSG00000001436 ~ 1) BIC = -50.16;(ENSMUSG00000001436 ~ A_oligodendrocyte_reference) BIC = -48.51;(ENSMUSG00000001436 ~ A_neuron_reference) BIC = -48.19	3	TRUE	A_oligodendrocyte_reference = 1.2414;A_neuron_reference = 1.1178	NA	0.263671	0.214447	NA	NA
Kpnb1	karyopherin (importin) beta 1	11	97021028	97049195	-1	D	ENSMUSG00000001440	FALSE	(ENSMUSG00000001440 ~ A_oligodendrocyte_reference) BIC = -107.89;(ENSMUSG00000001440 ~ A_astrocyte_reference + A_neuron_reference + A_oligodendrocyte_reference) BIC = -106.53;(ENSMUSG00000001440 ~ A_microglia_reference + A_oligodendrocyte_reference) BIC = -106.31;(ENSMUSG00000001440 ~ A_endothelial_reference + A_oligodendrocyte_reference) BIC = -106.29;(ENSMUSG00000001440 ~ A_neuron_reference + A…	5	TRUE	A_oligodendrocyte_reference = 2.813;A_astrocyte_reference = 1.7772;A_neuron_reference = 1.4804;A_microglia_reference = 1.2438;A_endothelial_reference = 1.2342	0.075535	0.138767	0.00490775	0.213578	0.217127
Npepps	aminopeptidase puromycin sensitive	11	97067156	97141952	-1	D	ENSMUSG00000001441	FALSE	(ENSMUSG00000001441 ~ A_oligodendrocyte_reference) BIC = -82.54;(ENSMUSG00000001441 ~ A_neuron_reference + A_oligodendrocyte_reference) BIC = -81.02	2	TRUE	A_oligodendrocyte_reference = 2.8048;A_neuron_reference = 1.2618	NA	0.207026	0.00503498	NA	NA
Tbx21	T-box 21	11	96959385	96976645	-1	D	ENSMUSG00000001444	FALSE	(ENSMUSG00000001444 ~ 1) BIC = 89.24;(ENSMUSG00000001444 ~ A_microglia_reference) BIC = 90.16	2	TRUE	A_microglia_reference = 1.4868	NA	NA	NA	0.137065	NA
Mrpl10	mitochondrial ribosomal protein L10	11	96902874	96910527	1	D	ENSMUSG00000001445	FALSE	(ENSMUSG00000001445 ~ A_neuron_reference + A_oligodendrocyte_reference) BIC = -71.55	1	FALSE	NA	NA	0.604145	0.00358953	NA	NA
Cyp51	cytochrome P450, family 51	5	4081145	4104746	-1	A1	ENSMUSG00000001467	FALSE	(ENSMUSG00000001467 ~ 1) BIC = -75.5	1	FALSE	NA	NA	NA	NA	NA	NA
Tcf25	transcription factor 25 (basic helix-loop-helix)	8	125897724	125928073	1	E1	ENSMUSG00000001472	FALSE	(ENSMUSG00000001472 ~ A_neuron_reference) BIC = -84.94;(ENSMUSG00000001472 ~ A_microglia_reference + A_neuron_reference) BIC = -83.68	2	TRUE	A_neuron_reference = 2.6888;A_microglia_reference = 1.3515	NA	0.0071709	NA	0.17652	NA
Tubb6	tubulin, beta 6 class V	18	67550371	67562402	1	E1	ENSMUSG00000001473	FALSE	(ENSMUSG00000001473 ~ A_microglia_reference) BIC = 41.41	1	FALSE	NA	NA	NA	NA	0.000434685	NA
Def8	differentially expressed in FDCP 8	8	125966886	125987170	1	E1	ENSMUSG00000001482	FALSE	(ENSMUSG00000001482 ~ A_astrocyte_reference + A_microglia_reference + A_oligodendrocyte_reference) BIC = -92.68;(ENSMUSG00000001482 ~ A_astrocyte_reference + A_oligodendrocyte_reference) BIC = -91.52	2	TRUE	A_astrocyte_reference = 2.9176;A_microglia_reference = 1.9694;A_oligodendrocyte_reference = 2.636	0.00352774	NA	0.00838917	0.048909	NA
Nkx2-1	NK2 homeobox 1	12	57632922	57637895	-1	C1	ENSMUSG00000001496	FALSE	(ENSMUSG00000001496 ~ A_neuron_reference) BIC = 25.73	1	FALSE	NA	NA	6.03127e-09	NA	NA	NA
Col1a1	collagen, type I, alpha 1	11	94797538	94814356	1	D	ENSMUSG00000001506	FALSE	(ENSMUSG00000001506 ~ A_microglia_reference) BIC = 39.73;(ENSMUSG00000001506 ~ A_microglia_reference + A_neuron_reference) BIC = 40.65	2	TRUE	A_microglia_reference = 2.8693;A_neuron_reference = 1.4599	NA	0.144324	NA	0.00411422	NA
Itga3	integrin alpha 3	11	94905788	94938115	-1	D	ENSMUSG00000001507	FALSE	(ENSMUSG00000001507 ~ A_microglia_reference + A_neuron_reference) BIC = -30.12;(ENSMUSG00000001507 ~ A_microglia_reference + A_neuron_reference + A_oligodendrocyte_reference) BIC = -28.99;(ENSMUSG00000001507 ~ A_neuron_reference) BIC = -28.86	3	TRUE	A_microglia_reference = 2.1228;A_neuron_reference = 3.5989;A_oligodendrocyte_reference = 1.3625	NA	0.00031953	0.173035	0.0337678	NA
Foxm1	forkhead box M1	6	128312985	128325911	1	F3	ENSMUSG00000001517	FALSE	(ENSMUSG00000001517 ~ A_neuron_reference) BIC = -3.49;(ENSMUSG00000001517 ~ 1) BIC = -2.36;(ENSMUSG00000001517 ~ A_astrocyte_reference + A_neuron_reference) BIC = -2.16;(ENSMUSG00000001517 ~ A_oligodendrocyte_reference) BIC = -2.13	4	TRUE	A_neuron_reference = 1.8517;A_astrocyte_reference = 1.3274;A_oligodendrocyte_reference = 1.6899	0.184379	0.0640704	0.0910384	NA	NA
Itfg2	integrin alpha FG-GAP repeat containing 2	6	128359462	128374949	-1	F3	ENSMUSG00000001518	FALSE	(ENSMUSG00000001518 ~ A_microglia_reference + A_neuron_reference) BIC = -49.09	1	FALSE	NA	NA	3.95142e-09	NA	0.162552	NA
Nrip2	nuclear receptor interacting protein 2	6	128349314	128358950	1	F3	ENSMUSG00000001520	FALSE	(ENSMUSG00000001520 ~ 1) BIC = -7.62	1	FALSE	NA	NA	NA	NA	NA	NA
Tulp3	tubby-like protein 3	6	128271158	128305869	-1	F3	ENSMUSG00000001521	FALSE	(ENSMUSG00000001521 ~ A_oligodendrocyte_reference) BIC = -54.59;(ENSMUSG00000001521 ~ A_astrocyte_reference) BIC = -54.08;(ENSMUSG00000001521 ~ 1) BIC = -52.84	3	TRUE	A_oligodendrocyte_reference = 2.1909;A_astrocyte_reference = 2.0701	0.0384476	NA	0.0284573	NA	NA
Gtf2h4	general transcription factor II H, polypeptide 4	17	35804675	35810684	-1	B1	ENSMUSG00000001524	FALSE	(ENSMUSG00000001524 ~ A_oligodendrocyte_reference) BIC = -49.14	1	FALSE	NA	NA	NA	9.15585e-06	NA	NA
Tubb5	tubulin, beta 5 class I	17	35970871	35975251	-1	B1	ENSMUSG00000001525	FALSE	(ENSMUSG00000001525 ~ A_oligodendrocyte_reference) BIC = -58.92	1	FALSE	NA	NA	NA	0.00034617	NA	NA
Ell2	elongation factor RNA polymerase II 2	13	75844932	75909804	1	C1	ENSMUSG00000001542	FALSE	(ENSMUSG00000001542 ~ A_neuron_reference) BIC = -41.46	1	FALSE	NA	NA	0.000147641	NA	NA	NA
Jup	junction plakoglobin	11	100230272	100259077	-1	D	ENSMUSG00000001552	FALSE	(ENSMUSG00000001552 ~ A_endothelial_reference + A_neuron_reference) BIC = -18.76;(ENSMUSG00000001552 ~ A_neuron_reference) BIC = -17.11	2	TRUE	A_endothelial_reference = 2.1275;A_neuron_reference = 5.6843	NA	1e-08	NA	NA	0.0333763
Fkbp10	FK506 binding protein 10	11	100277011	100286138	1	D	ENSMUSG00000001555	FALSE	(ENSMUSG00000001555 ~ A_oligodendrocyte_reference) BIC = -38.9;(ENSMUSG00000001555 ~ A_microglia_reference + A_oligodendrocyte_reference) BIC = -38.16;(ENSMUSG00000001555 ~ A_neuron_reference) BIC = -38.02	3	TRUE	A_oligodendrocyte_reference = 3.132;A_microglia_reference = 1.513;A_neuron_reference = 3.1169	NA	0.0018276	0.00173594	0.130271	NA
Nom1	nucleolar protein with MIF4G domain 1	5	29761204	29780046	1	B1	ENSMUSG00000001569	FALSE	(ENSMUSG00000001569 ~ A_endothelial_reference) BIC = -72.91	1	FALSE	NA	NA	NA	NA	NA	0.00149097
Ergic1	endoplasmic reticulum-golgi intermediate compartment (ERGIC) 1	17	26698434	26793876	1	A3.3	ENSMUSG00000001576	FALSE	(ENSMUSG00000001576 ~ A_oligodendrocyte_reference) BIC = -89.17;(ENSMUSG00000001576 ~ A_neuron_reference + A_oligodendrocyte_reference) BIC = -88.52;(ENSMUSG00000001576 ~ A_neuron_reference) BIC = -87.23	3	TRUE	A_oligodendrocyte_reference = 2.7166;A_neuron_reference = 1.7772	NA	0.0755361	0.00659515	NA	NA
Ifrd1	interferon-related developmental regulator 1	12	40928154	40975091	-1	B1	ENSMUSG00000001627	FALSE	(ENSMUSG00000001627 ~ 1) BIC = -55.23;(ENSMUSG00000001627 ~ A_astrocyte_reference) BIC = -54.79;(ENSMUSG00000001627 ~ A_astrocyte_reference + A_microglia_reference) BIC = -53.29	3	TRUE	A_astrocyte_reference = 1.5901;A_microglia_reference = 1.2692	0.111816	NA	NA	0.204364	NA
Stk38l	serine/threonine kinase 38 like	6	146673517	146727334	1	G3	ENSMUSG00000001630	FALSE	(ENSMUSG00000001630 ~ A_oligodendrocyte_reference) BIC = -57.19;(ENSMUSG00000001630 ~ A_endothelial_reference + A_oligodendrocyte_reference) BIC = -56.02	2	TRUE	A_oligodendrocyte_reference = 4.3679;A_endothelial_reference = 1.3793	NA	NA	1.254e-05	NA	0.167788
Brpf1	bromodomain and PHD finger containing, 1	6	113257175	113274851	1	E3	ENSMUSG00000001632	FALSE	(ENSMUSG00000001632 ~ A_astrocyte_reference + A_neuron_reference) BIC = -80.83;(ENSMUSG00000001632 ~ A_microglia_reference + A_neuron_reference) BIC = -80.37;(ENSMUSG00000001632 ~ A_neuron_reference) BIC = -80.15;(ENSMUSG00000001632 ~ A_astrocyte_reference) BIC = -79.82;(ENSMUSG00000001632 ~ A_astrocyte_reference + A_oligodendrocyte_reference) BIC = -79.34	5	TRUE	A_astrocyte_reference = 2.2503;A_neuron_reference = 2.5147;A_microglia_reference = 1.7764;A_oligodendrocyte_reference = 1.5871	0.0244321	0.011912	0.112484	0.0756615	NA
Akr1b3	aldo-keto reductase family 1, member B3 (aldose reductase)	6	34253934	34267497	-1	B1	ENSMUSG00000001642	FALSE	(ENSMUSG00000001642 ~ 1) BIC = -63.67;(ENSMUSG00000001642 ~ A_astrocyte_reference + A_oligodendrocyte_reference) BIC = -62.98	2	TRUE	A_astrocyte_reference = 2.0827;A_oligodendrocyte_reference = 2.1699	0.0372783	NA	0.0300137	NA	NA
Gstt1	glutathione S-transferase, theta 1	10	75246558	75261329	-1	C1	ENSMUSG00000001663	FALSE	(ENSMUSG00000001663 ~ A_oligodendrocyte_reference) BIC = -23.31;(ENSMUSG00000001663 ~ A_microglia_reference + A_oligodendrocyte_reference) BIC = -22.35	2	TRUE	A_oligodendrocyte_reference = 2.3859;A_microglia_reference = 1.4471	NA	NA	0.017036	0.14787	NA
Gstt3	glutathione S-transferase, theta 3	10	75236860	75244159	-1	C1	ENSMUSG00000001665	FALSE	(ENSMUSG00000001665 ~ A_endothelial_reference + A_microglia_reference + A_neuron_reference + A_oligodendrocyte_reference) BIC = 20.25;(ENSMUSG00000001665 ~ A_endothelial_reference + A_microglia_reference + A_oligodendrocyte_reference) BIC = 21.1	2	TRUE	A_endothelial_reference = 3.0671;A_microglia_reference = 2.3916;A_neuron_reference = 1.8561;A_oligodendrocyte_reference = 2.5985	NA	0.0634408	0.00936223	0.0167744	0.00216157
Ddt	D-dopachrome tautomerase	10	75233975	75236159	-1	C1	ENSMUSG00000001666	FALSE	(ENSMUSG00000001666 ~ A_endothelial_reference + A_neuron_reference) BIC = -13.31;(ENSMUSG00000001666 ~ A_neuron_reference) BIC = -13.18;(ENSMUSG00000001666 ~ A_astrocyte_reference + A_endothelial_reference) BIC = -11.62;(ENSMUSG00000001666 ~ A_neuron_reference + A_oligodendrocyte_reference) BIC = -11.48	4	TRUE	A_endothelial_reference = 1.8258;A_neuron_reference = 2.3098;A_astrocyte_reference = 2.3336;A_oligodendrocyte_reference = 1.1975	0.0196176	0.0209018	0.231109	NA	0.0678825
Ddx18	DEAD (Asp-Glu-Ala-Asp) box polypeptide 18	1	123450412	123464566	-1	E2.3	ENSMUSG00000001674	FALSE	(ENSMUSG00000001674 ~ 1) BIC = -62.47;(ENSMUSG00000001674 ~ A_astrocyte_reference) BIC = -60.63	2	TRUE	A_astrocyte_reference = 1.1704	0.241856	NA	NA	NA	NA
Ubl3	ubiquitin-like 3	5	149316207	149364365	-1	G3	ENSMUSG00000001687	FALSE	(ENSMUSG00000001687 ~ A_neuron_reference) BIC = -55.85;(ENSMUSG00000001687 ~ A_astrocyte_reference + A_endothelial_reference + A_neuron_reference) BIC = -55.38;(ENSMUSG00000001687 ~ A_endothelial_reference + A_microglia_reference + A_neuron_reference) BIC = -54.86;(ENSMUSG00000001687 ~ A_endothelial_reference + A_neuron_reference) BIC = -54.76;(ENSMUSG00000001687 ~ A_astrocyte_reference + A_neuro…	6	TRUE	A_neuron_reference = 4.9975;A_astrocyte_reference = 1.5899;A_endothelial_reference = 1.7085;A_microglia_reference = 1.445	0.111858	5.8e-07	NA	0.148455	0.0875476
Gramd3	GRAM domain containing 3	18	56559991	56663446	1	D3	ENSMUSG00000001700	FALSE	(ENSMUSG00000001700 ~ A_endothelial_reference + A_microglia_reference + A_neuron_reference) BIC = -21.62;(ENSMUSG00000001700 ~ A_endothelial_reference + A_microglia_reference + A_oligodendrocyte_reference) BIC = -20.57	2	TRUE	A_endothelial_reference = 2.9883;A_microglia_reference = 2.5663;A_neuron_reference = 2.5068;A_oligodendrocyte_reference = 2.2936	NA	0.0121814	0.0218129	0.0102791	0.00280558
Eef1e1	eukaryotic translation elongation factor 1 epsilon 1	13	38737567	38750897	-1	A3.3	ENSMUSG00000001707	FALSE	(ENSMUSG00000001707 ~ 1) BIC = -55.05;(ENSMUSG00000001707 ~ A_neuron_reference) BIC = -53.63;(ENSMUSG00000001707 ~ A_neuron_reference + A_oligodendrocyte_reference) BIC = -53.14;(ENSMUSG00000001707 ~ A_astrocyte_reference) BIC = -53.09	4	TRUE	A_neuron_reference = 1.3696;A_oligodendrocyte_reference = 1.5849;A_astrocyte_reference = 1.1229	0.261501	0.17081	0.112983	NA	NA
Akt1	thymoma viral proto-oncogene 1	12	113892032	113913095	-1	F1	ENSMUSG00000001729	FALSE	(ENSMUSG00000001729 ~ A_astrocyte_reference + A_endothelial_reference) BIC = -89.37	1	FALSE	NA	0.0748481	NA	NA	NA	0.000427298
Il16	interleukin 16	7	90791358	90894236	-1	D3	ENSMUSG00000001741	FALSE	(ENSMUSG00000001741 ~ A_neuron_reference) BIC = 38.75;(ENSMUSG00000001741 ~ A_microglia_reference + A_neuron_reference) BIC = 39.84;(ENSMUSG00000001741 ~ A_oligodendrocyte_reference) BIC = 40.56	3	TRUE	A_neuron_reference = 2.3167;A_microglia_reference = 1.4051;A_oligodendrocyte_reference = 1.8775	NA	0.0205209	0.0604493	0.159989	NA
Tcirg1	T cell, immune regulator 1, ATPase, H+ transporting, lysosomal V0 protein A3	19	3896050	3907133	-1	A	ENSMUSG00000001750	FALSE	(ENSMUSG00000001750 ~ A_endothelial_reference + A_neuron_reference) BIC = -21.49;(ENSMUSG00000001750 ~ A_endothelial_reference + A_neuron_reference + A_oligodendrocyte_reference) BIC = -20.72	2	TRUE	A_endothelial_reference = 2.7728;A_neuron_reference = 3.311;A_oligodendrocyte_reference = 1.4711	NA	0.00092962	0.141264	NA	0.0055572
Naglu	alpha-N-acetylglucosaminidase (Sanfilippo disease IIIB)	11	100931326	100938986	1	D	ENSMUSG00000001751	FALSE	(ENSMUSG00000001751 ~ A_oligodendrocyte_reference) BIC = -35.57;(ENSMUSG00000001751 ~ A_neuron_reference + A_oligodendrocyte_reference) BIC = -33.97	2	TRUE	A_oligodendrocyte_reference = 2.0765;A_neuron_reference = 1.2347	NA	0.216954	0.0378462	NA	NA
Coasy	Coenzyme A synthase	11	100943879	100947933	1	D	ENSMUSG00000001755	FALSE	(ENSMUSG00000001755 ~ A_microglia_reference) BIC = -55.1;(ENSMUSG00000001755 ~ 1) BIC = -54.31;(ENSMUSG00000001755 ~ A_astrocyte_reference + A_microglia_reference) BIC = -53.31;(ENSMUSG00000001755 ~ A_oligodendrocyte_reference) BIC = -53.13	4	TRUE	A_microglia_reference = 1.8478;A_astrocyte_reference = 1.1635;A_oligodendrocyte_reference = 1.4019	0.244645	NA	0.160958	0.0646292	NA
Smo	smoothened homolog (Drosophila)	6	29685694	29711365	1	A3.3	ENSMUSG00000001761	FALSE	(ENSMUSG00000001761 ~ A_microglia_reference + A_neuron_reference) BIC = -22.71;(ENSMUSG00000001761 ~ A_microglia_reference + A_neuron_reference + A_oligodendrocyte_reference) BIC = -21.2;(ENSMUSG00000001761 ~ A_microglia_reference) BIC = -20.9	3	TRUE	A_microglia_reference = 4.2116;A_neuron_reference = 2.0275;A_oligodendrocyte_reference = 1.2415	NA	0.0426085	0.214427	2.535e-05	NA
Tspan33	tetraspanin 33	6	29644222	29668559	1	A3.3	ENSMUSG00000001763	FALSE	(ENSMUSG00000001763 ~ A_neuron_reference) BIC = -6.86;(ENSMUSG00000001763 ~ A_neuron_reference + A_oligodendrocyte_reference) BIC = -6.04	2	TRUE	A_neuron_reference = 3.3409;A_oligodendrocyte_reference = 1.4879	NA	0.00083519	0.136774	NA	NA
Crnkl1	Crn, crooked neck-like 1 (Drosophila)	2	145743215	145760750	-1	G1	ENSMUSG00000001767	FALSE	(ENSMUSG00000001767 ~ A_microglia_reference + A_neuron_reference) BIC = -51.16;(ENSMUSG00000001767 ~ 1) BIC = -51.15;(ENSMUSG00000001767 ~ A_microglia_reference + A_oligodendrocyte_reference) BIC = -51.09;(ENSMUSG00000001767 ~ A_microglia_reference) BIC = -50.53;(ENSMUSG00000001767 ~ A_endothelial_reference + A_microglia_reference + A_oligodendrocyte_reference) BIC = -49.58;(ENSMUSG00000001767 ~ …	6	TRUE	A_microglia_reference = 2.0257;A_neuron_reference = 1.8806;A_oligodendrocyte_reference = 1.9109;A_endothelial_reference = 1.2417	NA	0.0600292	0.0560181	0.0427968	0.214331
Rin2	Ras and Rab interactor 2	2	145610470	145713352	1	G1	ENSMUSG00000001768	FALSE	(ENSMUSG00000001768 ~ A_endothelial_reference) BIC = -10.13	1	FALSE	NA	NA	NA	NA	NA	0.000734315
Folh1	folate hydrolase	7	93867862	93924374	-1	D3	ENSMUSG00000001773	FALSE	(ENSMUSG00000001773 ~ A_endothelial_reference) BIC = -25.77;(ENSMUSG00000001773 ~ A_endothelial_reference + A_oligodendrocyte_reference) BIC = -24.67	2	TRUE	A_endothelial_reference = 2.7571;A_oligodendrocyte_reference = 1.4008	NA	NA	0.161272	NA	0.00583091
Chordc1	cysteine and histidine-rich domain (CHORD)-containing, zinc-binding protein 1	9	18096711	18118444	1	A2	ENSMUSG00000001774	FALSE	(ENSMUSG00000001774 ~ A_astrocyte_reference) BIC = -22.96	1	FALSE	NA	0.000700878	NA	NA	NA	NA
D10Wsu52e	DNA segment, Chr 10, Wayne State University 52, expressed	10	85401382	85420568	-1	C1	ENSMUSG00000001783	FALSE	(ENSMUSG00000001783 ~ 1) BIC = -78.3;(ENSMUSG00000001783 ~ A_neuron_reference + A_oligodendrocyte_reference) BIC = -77.76	2	TRUE	A_neuron_reference = 2.1734;A_oligodendrocyte_reference = 2.3138	NA	0.0297522	0.0206777	NA	NA
Pwp1	PWP1 homolog (S. cerevisiae)	10	85334576	85351841	1	C1	ENSMUSG00000001785	FALSE	(ENSMUSG00000001785 ~ A_oligodendrocyte_reference) BIC = -68.56;(ENSMUSG00000001785 ~ 1) BIC = -68.43;(ENSMUSG00000001785 ~ A_neuron_reference) BIC = -68.21;(ENSMUSG00000001785 ~ A_microglia_reference) BIC = -68.06;(ENSMUSG00000001785 ~ A_astrocyte_reference) BIC = -66.9	5	TRUE	A_oligodendrocyte_reference = 1.7897;A_neuron_reference = 1.6951;A_microglia_reference = 1.6516;A_astrocyte_reference = 1.2862	0.198384	0.0900617	0.0735095	0.0986233	NA
Fbxo7	F-box protein 7	10	85484717	85514618	1	C1	ENSMUSG00000001786	FALSE	(ENSMUSG00000001786 ~ A_neuron_reference) BIC = -82.65	1	FALSE	NA	NA	5.5881e-08	NA	NA	NA
Capns1	calpain, small subunit 1	7	30971961	30980183	-1	B1	ENSMUSG00000001794	FALSE	(ENSMUSG00000001794 ~ A_oligodendrocyte_reference) BIC = -63.32;(ENSMUSG00000001794 ~ A_neuron_reference + A_oligodendrocyte_reference) BIC = -62.61;(ENSMUSG00000001794 ~ A_endothelial_reference + A_oligodendrocyte_reference) BIC = -62.24;(ENSMUSG00000001794 ~ A_endothelial_reference) BIC = -62.12;(ENSMUSG00000001794 ~ 1) BIC = -61.93	5	TRUE	A_oligodendrocyte_reference = 1.7229;A_neuron_reference = 1.522;A_endothelial_reference = 1.5701	NA	0.128	0.0849109	NA	0.116386
Lrp3	low density lipoprotein receptor-related protein 3	7	35984852	36000389	-1	B1	ENSMUSG00000001802	FALSE	(ENSMUSG00000001802 ~ A_oligodendrocyte_reference) BIC = -54.98	1	FALSE	NA	NA	NA	0.00196188	NA	NA
Folr1	folate receptor 1 (adult)	7	109006845	109019302	-1	E3	ENSMUSG00000001827	FALSE	(ENSMUSG00000001827 ~ 1) BIC = 129.74;(ENSMUSG00000001827 ~ A_neuron_reference) BIC = 130.69;(ENSMUSG00000001827 ~ A_oligodendrocyte_reference) BIC = 130.97;(ENSMUSG00000001827 ~ A_astrocyte_reference) BIC = 131.08	4	TRUE	A_neuron_reference = 1.4784;A_oligodendrocyte_reference = 1.3884;A_astrocyte_reference = 1.3513	0.176614	0.139313	0.165002	NA	NA
Clpb	ClpB caseinolytic peptidase B homolog (E. coli)	7	108812147	108943974	1	E3	ENSMUSG00000001829	FALSE	(ENSMUSG00000001829 ~ A_endothelial_reference) BIC = -85.4;(ENSMUSG00000001829 ~ A_astrocyte_reference + A_endothelial_reference + A_oligodendrocyte_reference) BIC = -84.39;(ENSMUSG00000001829 ~ A_endothelial_reference + A_oligodendrocyte_reference) BIC = -84.2;(ENSMUSG00000001829 ~ 1) BIC = -84.06	4	TRUE	A_endothelial_reference = 2.2445;A_astrocyte_reference = 1.7329;A_oligodendrocyte_reference = 1.5845	0.0831206	NA	0.113083	NA	0.0248024
2016-09-07	septin 7	9	25056204	25116150	1	A4	ENSMUSG00000001833	FALSE	(ENSMUSG00000001833 ~ A_astrocyte_reference + A_microglia_reference) BIC = -59.7;(ENSMUSG00000001833 ~ 1) BIC = -59.66;(ENSMUSG00000001833 ~ A_microglia_reference) BIC = -58.17;(ENSMUSG00000001833 ~ A_astrocyte_reference + A_microglia_reference + A_neuron_reference) BIC = -58.07	4	TRUE	A_astrocyte_reference = 2.0304;A_microglia_reference = 1.848;A_neuron_reference = 1.1976	0.0423128	0.231083	NA	0.0646035	NA
Zdhhc4	zinc finger, DHHC domain containing 4	5	144078168	144090935	-1	G2	ENSMUSG00000001844	FALSE	(ENSMUSG00000001844 ~ A_astrocyte_reference + A_microglia_reference) BIC = -64.27;(ENSMUSG00000001844 ~ A_astrocyte_reference + A_microglia_reference + A_oligodendrocyte_reference) BIC = -63.03	2	TRUE	A_astrocyte_reference = 3.3986;A_microglia_reference = 2.4813;A_oligodendrocyte_reference = 1.3303	0.0006773	NA	0.183415	0.0130919	NA
Rac1	RAS-related C3 botulinum substrate 1	5	144266346	144288904	-1	G2	ENSMUSG00000001847	FALSE	(ENSMUSG00000001847 ~ A_microglia_reference + A_oligodendrocyte_reference) BIC = -88.84;(ENSMUSG00000001847 ~ A_endothelial_reference + A_microglia_reference + A_oligodendrocyte_reference) BIC = -87.45	2	TRUE	A_microglia_reference = 4.3829;A_oligodendrocyte_reference = 2.6208;A_endothelial_reference = 1.2782	NA	NA	0.00877229	1.171e-05	0.201188
Nup214	nucleoporin 214	2	31829956	31909495	1	B	ENSMUSG00000001855	FALSE	(ENSMUSG00000001855 ~ A_microglia_reference) BIC = -34.17;(ENSMUSG00000001855 ~ A_microglia_reference + A_oligodendrocyte_reference) BIC = -33.77;(ENSMUSG00000001855 ~ 1) BIC = -32.7	3	TRUE	A_microglia_reference = 2.1712;A_oligodendrocyte_reference = 1.61	NA	NA	0.107399	0.0299138	NA
Aif1l	allograft inflammatory factor 1-like	2	31805780	31828962	1	B	ENSMUSG00000001864	FALSE	(ENSMUSG00000001864 ~ A_endothelial_reference + A_neuron_reference) BIC = -0.62;(ENSMUSG00000001864 ~ A_endothelial_reference + A_oligodendrocyte_reference) BIC = 0.21	2	TRUE	A_endothelial_reference = 3.146;A_neuron_reference = 2.8883;A_oligodendrocyte_reference = 2.7273	NA	0.00387284	0.00638487	NA	0.0016552
Ltbp1	latent transforming growth factor beta binding protein 1	17	75404908	75791852	1	E2	ENSMUSG00000001870	FALSE	(ENSMUSG00000001870 ~ A_microglia_reference + A_neuron_reference) BIC = -34.18	1	FALSE	NA	NA	0.00930887	NA	0.00237806	NA
Ugp2	UDP-glucose pyrophosphorylase 2	11	21221141	21271204	-1	A3.1	ENSMUSG00000001891	FALSE	(ENSMUSG00000001891 ~ A_endothelial_reference + A_microglia_reference + A_neuron_reference) BIC = -53.19	1	FALSE	NA	NA	0.0193695	NA	3.16682e-05	0.0612306
Kcnh6	potassium voltage-gated channel, subfamily H (eag-related), member 6	11	105869438	105895863	1	E1	ENSMUSG00000001901	FALSE	(ENSMUSG00000001901 ~ 1) BIC = -12.67	1	FALSE	NA	NA	NA	NA	NA	NA
Trmt1	TRM1 tRNA methyltransferase 1 homolog (S. cerevisiae)	8	87210206	87223707	1	C3	ENSMUSG00000001909	FALSE	(ENSMUSG00000001909 ~ A_astrocyte_reference + A_endothelial_reference + A_microglia_reference) BIC = -49.54;(ENSMUSG00000001909 ~ A_astrocyte_reference + A_endothelial_reference) BIC = -48.24;(ENSMUSG00000001909 ~ A_endothelial_reference + A_microglia_reference) BIC = -47.95;(ENSMUSG00000001909 ~ A_astrocyte_reference + A_microglia_reference) BIC = -47.91	4	TRUE	A_astrocyte_reference = 2.1386;A_endothelial_reference = 2.0874;A_microglia_reference = 2.1582	0.0324651	NA	NA	0.0309117	0.0368535
Nacc1	nucleus accumbens associated 1, BEN and BTB (POZ) domain containing	8	87194382	87211761	-1	C3	ENSMUSG00000001910	FALSE	(ENSMUSG00000001910 ~ A_oligodendrocyte_reference) BIC = -94.5;(ENSMUSG00000001910 ~ A_endothelial_reference + A_oligodendrocyte_reference) BIC = -93.28;(ENSMUSG00000001910 ~ A_endothelial_reference + A_neuron_reference) BIC = -93.16	3	TRUE	A_oligodendrocyte_reference = 3.2324;A_endothelial_reference = 1.6393;A_neuron_reference = 3.0127	NA	0.00258931	0.00122767	NA	0.101153
Nfix	nuclear factor I/X	8	87223775	87324243	-1	C3	ENSMUSG00000001911	FALSE	(ENSMUSG00000001911 ~ A_neuron_reference) BIC = 7.53;(ENSMUSG00000001911 ~ A_microglia_reference + A_neuron_reference) BIC = 8.17	2	TRUE	A_neuron_reference = 5.0343;A_microglia_reference = 1.5419	NA	4.8e-07	NA	0.123105	NA
Slc1a5	solute carrier family 1 (neutral amino acid transporter), member 5	7	17366695	17383623	1	A2	ENSMUSG00000001918	FALSE	(ENSMUSG00000001918 ~ A_oligodendrocyte_reference) BIC = -4.4;(ENSMUSG00000001918 ~ A_endothelial_reference + A_oligodendrocyte_reference) BIC = -3.04	2	TRUE	A_oligodendrocyte_reference = 4.1958;A_endothelial_reference = 1.3172	NA	NA	2.719e-05	NA	0.187785
Uba1	ubiquitin-like modifier activating enzyme 1	X	20235452	20260305	1	A1.3	ENSMUSG00000001924	FALSE	(ENSMUSG00000001924 ~ 1) BIC = -51.42	1	FALSE	NA	NA	NA	NA	NA	NA
Vwf	Von Willebrand factor homolog	6	125496792	125636697	1	F3	ENSMUSG00000001930	FALSE	(ENSMUSG00000001930 ~ A_endothelial_reference + A_microglia_reference + A_oligodendrocyte_reference) BIC = 30.9;(ENSMUSG00000001930 ~ A_endothelial_reference + A_oligodendrocyte_reference) BIC = 30.94	2	TRUE	A_endothelial_reference = 4.4466;A_microglia_reference = 1.6941;A_oligodendrocyte_reference = 3.403	NA	NA	0.00066661	0.0902511	8.72e-06
Siae	sialic acid acetylesterase	9	37421432	37455903	1	A4	ENSMUSG00000001942	FALSE	(ENSMUSG00000001942 ~ A_endothelial_reference + A_neuron_reference) BIC = -64.3;(ENSMUSG00000001942 ~ A_endothelial_reference + A_neuron_reference + A_oligodendrocyte_reference) BIC = -62.71	2	TRUE	A_endothelial_reference = 3.4992;A_neuron_reference = 1.9524;A_oligodendrocyte_reference = 1.2128	NA	0.0508896	0.225214	NA	0.00046674
Vsig2	V-set and immunoglobulin domain containing 2	9	37346840	37351790	1	A4	ENSMUSG00000001943	FALSE	(ENSMUSG00000001943 ~ A_endothelial_reference) BIC = 28.17;(ENSMUSG00000001943 ~ A_endothelial_reference + A_oligodendrocyte_reference) BIC = 28.6;(ENSMUSG00000001943 ~ A_endothelial_reference + A_neuron_reference) BIC = 28.65	3	TRUE	A_endothelial_reference = 3.3634;A_oligodendrocyte_reference = 1.6035;A_neuron_reference = 1.5887	NA	0.112129	0.108815	NA	0.00077002
Esam	endothelial cell-specific adhesion molecule	9	37335663	37345904	1	A4	ENSMUSG00000001946	FALSE	(ENSMUSG00000001946 ~ A_endothelial_reference + A_neuron_reference) BIC = 6.86;(ENSMUSG00000001946 ~ A_endothelial_reference) BIC = 7.21;(ENSMUSG00000001946 ~ A_endothelial_reference + A_microglia_reference + A_neuron_reference) BIC = 7.72	3	TRUE	A_endothelial_reference = 4.8422;A_neuron_reference = 1.88;A_microglia_reference = 1.446	NA	0.0601126	NA	0.148163	1.28e-06
Spa17	sperm autoantigenic protein 17	9	37410886	37421199	-1	A4	ENSMUSG00000001948	FALSE	(ENSMUSG00000001948 ~ A_astrocyte_reference) BIC = 8.19;(ENSMUSG00000001948 ~ 1) BIC = 8.31;(ENSMUSG00000001948 ~ A_microglia_reference) BIC = 8.45	3	TRUE	A_astrocyte_reference = 1.7861;A_microglia_reference = 1.7154	0.0740804	NA	NA	0.0862649	NA
Fam50a	family with sequence similarity 50, member A	X	71558372	71565488	1	A7.3	ENSMUSG00000001962	FALSE	(ENSMUSG00000001962 ~ A_astrocyte_reference + A_endothelial_reference) BIC = -54.94;(ENSMUSG00000001962 ~ A_astrocyte_reference + A_endothelial_reference + A_microglia_reference) BIC = -53.48	2	TRUE	A_astrocyte_reference = 3.4127;A_endothelial_reference = 3.0244;A_microglia_reference = 1.2569	0.00064328	NA	NA	0.208807	0.00249164
Emd	emerin	X	71500026	71506887	1	A7.3	ENSMUSG00000001964	FALSE	(ENSMUSG00000001964 ~ A_oligodendrocyte_reference) BIC = -63.62	1	FALSE	NA	NA	NA	0.00159112	NA	NA
Taco1	translational activator of mitochondrially encoded cytochrome c oxidase I	11	105927375	105934926	1	E1	ENSMUSG00000001983	FALSE	(ENSMUSG00000001983 ~ 1) BIC = -41.5	1	FALSE	NA	NA	NA	NA	NA	NA
Grik3	glutamate receptor, ionotropic, kainate 3	4	125167944	125391417	1	D2.2	ENSMUSG00000001985	FALSE	(ENSMUSG00000001985 ~ A_astrocyte_reference + A_microglia_reference + A_oligodendrocyte_reference) BIC = -32.64;(ENSMUSG00000001985 ~ A_astrocyte_reference + A_microglia_reference) BIC = -30.68	2	TRUE	A_astrocyte_reference = 2.4394;A_microglia_reference = 2.6333;A_oligodendrocyte_reference = 2.1497	0.0147105	NA	0.0315781	0.0084554	NA
Gria3	glutamate receptor, ionotropic, AMPA3 (alpha 3)	X	38754031	39031778	1	A3.3	ENSMUSG00000001986	FALSE	(ENSMUSG00000001986 ~ A_endothelial_reference + A_neuron_reference) BIC = -29.34	1	FALSE	NA	NA	2.16902e-08	NA	NA	0.00450697
Npas1	neuronal PAS domain protein 1	7	17041070	17062129	-1	A2	ENSMUSG00000001988	FALSE	(ENSMUSG00000001988 ~ A_endothelial_reference + A_neuron_reference + A_oligodendrocyte_reference) BIC = -10.74;(ENSMUSG00000001988 ~ A_neuron_reference) BIC = -10.53;(ENSMUSG00000001988 ~ A_endothelial_reference + A_microglia_reference + A_neuron_reference + A_oligodendrocyte_reference) BIC = -9.45;(ENSMUSG00000001988 ~ A_neuron_reference + A_oligodendrocyte_reference) BIC = -9.3;(ENSMUSG00000001…	7	TRUE	A_endothelial_reference = 1.7825;A_neuron_reference = 2.5549;A_oligodendrocyte_reference = 1.8599;A_microglia_reference = 1.4	NA	0.010623	0.0629003	0.16151	0.0746644
Sipa1l2	signal-induced proliferation-associated 1 like 2	8	127941963	128016610	-1	E2	ENSMUSG00000001995	FALSE	(ENSMUSG00000001995 ~ A_astrocyte_reference + A_oligodendrocyte_reference) BIC = -42.93	1	FALSE	NA	5.72282e-06	NA	0.00633794	NA	NA
Ap4e1	adaptor-related protein complex AP-4, epsilon 1	2	126834453	126893645	1	F1	ENSMUSG00000001998	FALSE	(ENSMUSG00000001998 ~ A_astrocyte_reference + A_endothelial_reference + A_oligodendrocyte_reference) BIC = -21.83	1	FALSE	NA	0.0949956	NA	0.00660918	NA	0.00482752
Blvra	biliverdin reductase A	2	126896401	126922820	1	F1	ENSMUSG00000001999	FALSE	(ENSMUSG00000001999 ~ A_neuron_reference + A_oligodendrocyte_reference) BIC = -69.42	1	FALSE	NA	NA	0.0483692	0.00201996	NA	NA
Pdzd4	PDZ domain containing 4	X	71038698	71070308	-1	A7.3	ENSMUSG00000002006	FALSE	(ENSMUSG00000002006 ~ A_neuron_reference + A_oligodendrocyte_reference) BIC = -71.19;(ENSMUSG00000002006 ~ A_neuron_reference) BIC = -69.46;(ENSMUSG00000002006 ~ A_microglia_reference + A_neuron_reference + A_oligodendrocyte_reference) BIC = -69.29;(ENSMUSG00000002006 ~ A_endothelial_reference + A_neuron_reference + A_oligodendrocyte_reference) BIC = -69.26	4	TRUE	A_neuron_reference = 2.2736;A_oligodendrocyte_reference = 2.2115;A_microglia_reference = 1.1017;A_endothelial_reference = 1.0917	NA	0.0229902	0.027	0.270584	0.274968
Srpk3	serine/arginine-rich protein specific kinase 3	X	71019744	71024264	1	A7.3	ENSMUSG00000002007	FALSE	(ENSMUSG00000002007 ~ 1) BIC = 9.76;(ENSMUSG00000002007 ~ A_microglia_reference) BIC = 10.91;(ENSMUSG00000002007 ~ A_endothelial_reference) BIC = 11.22;(ENSMUSG00000002007 ~ A_microglia_reference + A_neuron_reference) BIC = 11.64	4	TRUE	A_microglia_reference = 1.5507;A_endothelial_reference = 1.3067;A_neuron_reference = 1.513	NA	0.130278	NA	0.120971	0.191311
Idh3g	isocitrate dehydrogenase 3 (NAD+), gamma	X	71024302	71032236	-1	A7.3	ENSMUSG00000002010	FALSE	(ENSMUSG00000002010 ~ A_endothelial_reference) BIC = -49.02;(ENSMUSG00000002010 ~ A_endothelial_reference + A_neuron_reference) BIC = -48.43;(ENSMUSG00000002010 ~ A_endothelial_reference + A_microglia_reference + A_neuron_reference) BIC = -47.42;(ENSMUSG00000002010 ~ A_astrocyte_reference + A_endothelial_reference + A_neuron_reference) BIC = -47.08	4	TRUE	A_endothelial_reference = 2.8299;A_neuron_reference = 1.6168;A_microglia_reference = 1.3984;A_astrocyte_reference = 1.2913	0.196601	0.105924	NA	0.162	0.00465687
Pnck	pregnancy upregulated non-ubiquitously expressed CaM kinase	X	70901333	70905456	-1	A7.3	ENSMUSG00000002012	FALSE	(ENSMUSG00000002012 ~ A_microglia_reference) BIC = -1.51;(ENSMUSG00000002012 ~ A_microglia_reference + A_oligodendrocyte_reference) BIC = -0.6;(ENSMUSG00000002012 ~ A_oligodendrocyte_reference) BIC = -0.44	3	TRUE	A_microglia_reference = 2.2679;A_oligodendrocyte_reference = 1.8241	NA	NA	0.068142	0.0233375	NA
Ssr4	signal sequence receptor, delta	X	71032367	71036169	1	A7.3	ENSMUSG00000002014	FALSE	(ENSMUSG00000002014 ~ A_endothelial_reference + A_oligodendrocyte_reference) BIC = -49.79;(ENSMUSG00000002014 ~ A_oligodendrocyte_reference) BIC = -49.51;(ENSMUSG00000002014 ~ A_microglia_reference + A_oligodendrocyte_reference) BIC = -49.35;(ENSMUSG00000002014 ~ A_endothelial_reference + A_microglia_reference + A_oligodendrocyte_reference) BIC = -49.17;(ENSMUSG00000002014 ~ A_astrocyte_reference…	7	TRUE	A_endothelial_reference = 1.7349;A_oligodendrocyte_reference = 2.4325;A_microglia_reference = 1.6393;A_astrocyte_reference = 1.4543;A_neuron_reference = 1.5104	0.145868	0.13094	0.0149932	0.101158	0.0827619
Bcap31	B cell receptor associated protein 31	X	70931517	70961514	-1	A7.3	ENSMUSG00000002015	FALSE	(ENSMUSG00000002015 ~ A_microglia_reference + A_neuron_reference + A_oligodendrocyte_reference) BIC = -69.02	1	FALSE	NA	NA	0.016677	0.00259186	3.2641e-05	NA
Fam98a	family with sequence similarity 98, member A	17	75936426	75951286	-1	E2	ENSMUSG00000002017	FALSE	(ENSMUSG00000002017 ~ A_oligodendrocyte_reference) BIC = -80.46;(ENSMUSG00000002017 ~ A_microglia_reference + A_oligodendrocyte_reference) BIC = -80.1;(ENSMUSG00000002017 ~ A_astrocyte_reference + A_oligodendrocyte_reference) BIC = -79.72	3	TRUE	A_oligodendrocyte_reference = 2.3474;A_microglia_reference = 1.6217;A_astrocyte_reference = 1.5103	0.130971	NA	0.0189055	0.104866	NA
Ltbp2	latent transforming growth factor beta binding protein 2	12	86124162	86217482	-1	D2	ENSMUSG00000002020	FALSE	(ENSMUSG00000002020 ~ A_neuron_reference) BIC = 67.92;(ENSMUSG00000002020 ~ A_neuron_reference + A_oligodendrocyte_reference) BIC = 69.39;(ENSMUSG00000002020 ~ A_oligodendrocyte_reference) BIC = 69.53	3	TRUE	A_neuron_reference = 2.6809;A_oligodendrocyte_reference = 1.7764	NA	0.00734313	0.0756626	NA	NA
Mll1	myeloid/lymphoid or mixed-lineage leukemia 1	9	44611438	44689379	-1	A5.2	ENSMUSG00000002028	FALSE	(ENSMUSG00000002028 ~ A_microglia_reference + A_oligodendrocyte_reference) BIC = -22.59	1	FALSE	NA	NA	NA	5.35184e-05	0.795668	NA
Ift46	intraflagellar transport 46 homolog (Chlamydomonas)	9	44575991	44600797	1	A5.2	ENSMUSG00000002031	FALSE	(ENSMUSG00000002031 ~ A_oligodendrocyte_reference) BIC = -70.64;(ENSMUSG00000002031 ~ A_astrocyte_reference) BIC = -69.77;(ENSMUSG00000002031 ~ A_neuron_reference) BIC = -68.88;(ENSMUSG00000002031 ~ 1) BIC = -68.66	4	TRUE	A_oligodendrocyte_reference = 2.2453;A_astrocyte_reference = 2.0406;A_neuron_reference = 1.8142	0.0412955	0.0696445	0.0247506	NA	NA
Tmem25	transmembrane protein 25	9	44601858	44607390	-1	A5.2	ENSMUSG00000002032	FALSE	(ENSMUSG00000002032 ~ A_microglia_reference) BIC = -40.7;(ENSMUSG00000002032 ~ A_microglia_reference + A_neuron_reference) BIC = -40.08;(ENSMUSG00000002032 ~ A_endothelial_reference + A_microglia_reference) BIC = -39.22	3	TRUE	A_microglia_reference = 3.4521;A_neuron_reference = 1.5484;A_endothelial_reference = 1.2758	NA	0.12153	NA	0.00055615	0.202025
Trappc6a	trafficking protein particle complex 6A	7	20094019	20101494	1	A3	ENSMUSG00000002043	FALSE	(ENSMUSG00000002043 ~ A_endothelial_reference) BIC = -12.72;(ENSMUSG00000002043 ~ A_endothelial_reference + A_oligodendrocyte_reference) BIC = -12.13;(ENSMUSG00000002043 ~ A_endothelial_reference + A_neuron_reference + A_oligodendrocyte_reference) BIC = -10.95	3	TRUE	A_endothelial_reference = 2.4251;A_oligodendrocyte_reference = 1.4356;A_neuron_reference = 1.3473	NA	0.177872	0.151116	NA	0.0153057
Supt6h	suppressor of Ty 6 homolog (S. cerevisiae)	11	78020248	78059489	-1	B5	ENSMUSG00000002052	FALSE	(ENSMUSG00000002052 ~ A_neuron_reference) BIC = -58.08;(ENSMUSG00000002052 ~ A_endothelial_reference + A_neuron_reference) BIC = -57.62;(ENSMUSG00000002052 ~ A_neuron_reference + A_oligodendrocyte_reference) BIC = -56.91;(ENSMUSG00000002052 ~ A_endothelial_reference + A_microglia_reference + A_neuron_reference) BIC = -56.13	4	TRUE	A_neuron_reference = 2.1421;A_endothelial_reference = 1.6712;A_oligodendrocyte_reference = 1.382;A_microglia_reference = 1.2471	NA	0.0321892	0.166981	0.212379	0.0946887
Spag5	sperm associated antigen 5	11	78115031	78135959	1	B5	ENSMUSG00000002055	FALSE	(ENSMUSG00000002055 ~ A_endothelial_reference + A_microglia_reference + A_neuron_reference) BIC = 7.14;(ENSMUSG00000002055 ~ A_astrocyte_reference + A_endothelial_reference + A_neuron_reference) BIC = 7.41;(ENSMUSG00000002055 ~ A_microglia_reference + A_neuron_reference) BIC = 7.73;(ENSMUSG00000002055 ~ A_astrocyte_reference + A_neuron_reference) BIC = 7.75;(ENSMUSG00000002055 ~ A_astrocyte_refer…	6	TRUE	A_endothelial_reference = 1.8473;A_microglia_reference = 1.8757;A_neuron_reference = 2.6745;A_astrocyte_reference = 1.8064	0.0708523	0.00748396	NA	0.0606973	0.064697
Unc119	unc-119 homolog (C. elegans)	11	78156984	78162666	1	B5	ENSMUSG00000002058	FALSE	(ENSMUSG00000002058 ~ A_oligodendrocyte_reference) BIC = -37.56;(ENSMUSG00000002058 ~ A_neuron_reference + A_oligodendrocyte_reference) BIC = -37.21;(ENSMUSG00000002058 ~ 1) BIC = -36.7	3	TRUE	A_oligodendrocyte_reference = 1.7976;A_neuron_reference = 1.6235	NA	0.104477	0.0722442	NA	NA
Rab34	RAB34, member of RAS oncogene family	11	78001932	78005695	1	B5	ENSMUSG00000002059	FALSE	(ENSMUSG00000002059 ~ A_endothelial_reference + A_neuron_reference) BIC = -15.55;(ENSMUSG00000002059 ~ A_endothelial_reference + A_microglia_reference + A_neuron_reference) BIC = -14.81;(ENSMUSG00000002059 ~ A_astrocyte_reference + A_endothelial_reference + A_neuron_reference) BIC = -14.63	3	TRUE	A_endothelial_reference = 3.7149;A_neuron_reference = 4.687;A_microglia_reference = 1.4807;A_astrocyte_reference = 1.4266	0.153709	2.77e-06	NA	0.138682	0.00020326
Sdf2	stromal cell derived factor 2	11	78059248	78068998	1	B5	ENSMUSG00000002064	FALSE	(ENSMUSG00000002064 ~ A_oligodendrocyte_reference) BIC = -59.82;(ENSMUSG00000002064 ~ A_microglia_reference + A_oligodendrocyte_reference) BIC = -59.24;(ENSMUSG00000002064 ~ A_astrocyte_reference + A_oligodendrocyte_reference) BIC = -58.76	3	TRUE	A_oligodendrocyte_reference = 2.8313;A_microglia_reference = 1.5595;A_astrocyte_reference = 1.4164	0.156647	NA	0.00463605	0.118882	NA
Ccne1	cyclin E1	7	38883003	38892553	-1	B2	ENSMUSG00000002068	FALSE	(ENSMUSG00000002068 ~ A_oligodendrocyte_reference) BIC = -24.15;(ENSMUSG00000002068 ~ A_neuron_reference) BIC = -22.46	2	TRUE	A_oligodendrocyte_reference = 3.1541;A_neuron_reference = 2.8279	NA	0.00468574	0.00161021	NA	NA
Bbc3	BCL2 binding component 3	7	16894965	16903554	1	A2	ENSMUSG00000002083	FALSE	(ENSMUSG00000002083 ~ A_microglia_reference + A_oligodendrocyte_reference) BIC = -25.68	1	FALSE	NA	NA	NA	5.77052e-05	1.78673e-06	NA
Mybpc3	myosin binding protein C, cardiac	2	90958301	90976673	1	E1	ENSMUSG00000002100	FALSE	(ENSMUSG00000002100 ~ A_neuron_reference) BIC = 110.84;(ENSMUSG00000002100 ~ A_oligodendrocyte_reference) BIC = 111.6;(ENSMUSG00000002100 ~ A_astrocyte_reference) BIC = 111.74;(ENSMUSG00000002100 ~ A_microglia_reference + A_neuron_reference) BIC = 111.97;(ENSMUSG00000002100 ~ A_astrocyte_reference + A_oligodendrocyte_reference) BIC = 112.62;(ENSMUSG00000002100 ~ A_endothelial_reference + A_oligod…	6	TRUE	A_neuron_reference = 2.5105;A_oligodendrocyte_reference = 2.2432;A_astrocyte_reference = 2.0088;A_microglia_reference = 1.3898;A_endothelial_reference = 1.3727	0.0445605	0.0120558	0.0248835	0.164592	0.169846
Psmc3	proteasome (prosome, macropain) 26S subunit, ATPase 3	2	90894166	90906526	1	E1	ENSMUSG00000002102	FALSE	(ENSMUSG00000002102 ~ A_oligodendrocyte_reference) BIC = -80.21	1	FALSE	NA	NA	NA	1.50326e-08	NA	NA
Acp2	acid phosphatase 2, lysosomal	2	91043042	91054255	1	E1	ENSMUSG00000002103	FALSE	(ENSMUSG00000002103 ~ A_endothelial_reference) BIC = -96.77	1	FALSE	NA	NA	NA	NA	NA	0.0026315
Slc39a13	solute carrier family 39 (metal ion transporter), member 13	2	90901948	90910574	-1	E1	ENSMUSG00000002105	FALSE	(ENSMUSG00000002105 ~ A_astrocyte_reference + A_endothelial_reference + A_neuron_reference) BIC = -77.67	1	FALSE	NA	1.03954e-08	0.00107803	NA	NA	2.45255e-06
Celf2	CUGBP, Elav-like family member 2	2	6460751	7002348	-1	A1	ENSMUSG00000002107	FALSE	(ENSMUSG00000002107 ~ 1) BIC = -56.99;(ENSMUSG00000002107 ~ A_oligodendrocyte_reference) BIC = -56.69;(ENSMUSG00000002107 ~ A_astrocyte_reference + A_oligodendrocyte_reference) BIC = -55.81	3	TRUE	A_oligodendrocyte_reference = 1.709;A_astrocyte_reference = 1.4687	0.141904	NA	0.0874426	NA	NA
Nr1h3	nuclear receptor subfamily 1, group H, member 3	2	91024218	91042991	-1	E1	ENSMUSG00000002108	FALSE	(ENSMUSG00000002108 ~ A_astrocyte_reference) BIC = -6.6;(ENSMUSG00000002108 ~ A_astrocyte_reference + A_endothelial_reference) BIC = -6.24;(ENSMUSG00000002108 ~ A_neuron_reference) BIC = -4.79	3	TRUE	A_astrocyte_reference = 3.6563;A_endothelial_reference = 1.6219;A_neuron_reference = 3.2102	0.00025591	0.00132664	NA	NA	0.10482
Ddb2	damage specific DNA binding protein 2	2	91051729	91077139	-1	E1	ENSMUSG00000002109	FALSE	(ENSMUSG00000002109 ~ A_astrocyte_reference + A_endothelial_reference) BIC = -65.31	1	FALSE	NA	1.57347e-07	NA	NA	NA	0.00887614
Sfpi1	SFFV proviral integration 1	2	90922547	90955913	1	E1	ENSMUSG00000002111	FALSE	(ENSMUSG00000002111 ~ A_endothelial_reference + A_oligodendrocyte_reference) BIC = -10.36;(ENSMUSG00000002111 ~ A_endothelial_reference) BIC = -10.21;(ENSMUSG00000002111 ~ A_oligodendrocyte_reference) BIC = -9.53;(ENSMUSG00000002111 ~ A_endothelial_reference + A_microglia_reference + A_oligodendrocyte_reference) BIC = -9.07;(ENSMUSG00000002111 ~ A_endothelial_reference + A_neuron_reference) BIC =…	5	TRUE	A_endothelial_reference = 2.1165;A_oligodendrocyte_reference = 1.9058;A_microglia_reference = 1.3122;A_neuron_reference = 1.2206	NA	0.222235	0.0566717	0.189447	0.0343047
Sf3a1	splicing factor 3a, subunit 1	11	4060353	4082544	1	A1	ENSMUSG00000002129	FALSE	(ENSMUSG00000002129 ~ A_oligodendrocyte_reference) BIC = -81.1;(ENSMUSG00000002129 ~ A_astrocyte_reference) BIC = -80.69;(ENSMUSG00000002129 ~ 1) BIC = -79.63;(ENSMUSG00000002129 ~ A_neuron_reference) BIC = -79.43	4	TRUE	A_oligodendrocyte_reference = 2.1261;A_astrocyte_reference = 2.0266;A_neuron_reference = 1.6987	0.0427082	0.0893735	0.0334944	NA	NA
Stat6	signal transducer and activator of transcription 6	10	127080042	127098013	1	D3	ENSMUSG00000002147	FALSE	(ENSMUSG00000002147 ~ A_endothelial_reference + A_microglia_reference + A_oligodendrocyte_reference) BIC = -23.63;(ENSMUSG00000002147 ~ A_astrocyte_reference + A_endothelial_reference + A_oligodendrocyte_reference) BIC = -21.77	2	TRUE	A_endothelial_reference = 5.0014;A_microglia_reference = 2.1725;A_oligodendrocyte_reference = 3.7267;A_astrocyte_reference = 1.7349	0.0827514	NA	0.00019401	0.0298199	5.7e-07
Clgn	calmegin	8	85913766	85952451	1	C2	ENSMUSG00000002190	FALSE	(ENSMUSG00000002190 ~ A_oligodendrocyte_reference) BIC = -36.66;(ENSMUSG00000002190 ~ A_microglia_reference + A_oligodendrocyte_reference) BIC = -35.49;(ENSMUSG00000002190 ~ A_neuron_reference + A_oligodendrocyte_reference) BIC = -35.25;(ENSMUSG00000002190 ~ A_microglia_reference + A_neuron_reference + A_oligodendrocyte_reference) BIC = -35.21	4	TRUE	A_oligodendrocyte_reference = 2.9792;A_microglia_reference = 1.5029;A_neuron_reference = 1.4382	NA	0.150372	0.00289031	0.132859	NA
Vrk3	vaccinia related kinase 3	7	52003783	52032885	1	B4	ENSMUSG00000002205	FALSE	(ENSMUSG00000002205 ~ A_astrocyte_reference + A_endothelial_reference) BIC = -62.5;(ENSMUSG00000002205 ~ A_endothelial_reference + A_neuron_reference) BIC = -61.62	2	TRUE	A_astrocyte_reference = 2.2114;A_endothelial_reference = 3.0048;A_neuron_reference = 2.01	0.0270103	0.0444353	NA	NA	0.00265726
1500002O20Rik	RIKEN cDNA 1500002O20 gene	7	25184638	25207797	1	A3	ENSMUSG00000002210	FALSE	(ENSMUSG00000002210 ~ A_microglia_reference) BIC = -53.74	1	FALSE	NA	NA	NA	NA	0.00528017	NA
Paxip1	PAX interacting (with transcription-activation domain) protein 1	5	28067207	28117879	-1	B1	ENSMUSG00000002221	FALSE	(ENSMUSG00000002221 ~ A_endothelial_reference + A_microglia_reference + A_neuron_reference) BIC = -86.61;(ENSMUSG00000002221 ~ A_endothelial_reference + A_neuron_reference) BIC = -86.02;(ENSMUSG00000002221 ~ A_neuron_reference) BIC = -85.97	3	TRUE	A_endothelial_reference = 1.9693;A_microglia_reference = 1.835;A_neuron_reference = 3.332	NA	0.00086236	NA	0.0665033	0.048915
Rmnd5a	required for meiotic nuclear division 5 homolog A (S. cerevisiae)	6	71338628	71390631	-1	C1	ENSMUSG00000002222	FALSE	(ENSMUSG00000002222 ~ A_astrocyte_reference + A_oligodendrocyte_reference) BIC = -67.15;(ENSMUSG00000002222 ~ A_astrocyte_reference) BIC = -66.52	2	TRUE	A_astrocyte_reference = 2.7505;A_oligodendrocyte_reference = 1.8812	0.00595004	NA	0.05995	NA	NA
Mov10	Moloney leukemia virus 10	3	104597754	104621481	-1	F2.2	ENSMUSG00000002227	FALSE	(ENSMUSG00000002227 ~ A_neuron_reference) BIC = -25.52;(ENSMUSG00000002227 ~ A_oligodendrocyte_reference) BIC = -24.14	2	TRUE	A_neuron_reference = 3.3933;A_oligodendrocyte_reference = 3.1386	NA	0.000690628	0.00169745	NA	NA
Ppm1j	protein phosphatase 1J	3	104583974	104588936	1	F2.2	ENSMUSG00000002228	FALSE	(ENSMUSG00000002228 ~ A_neuron_reference) BIC = 63.94;(ENSMUSG00000002228 ~ A_microglia_reference + A_neuron_reference) BIC = 65.62	2	TRUE	A_neuron_reference = 3.1368;A_microglia_reference = 1.2081	NA	0.0017083	NA	0.227024	NA
Rhoc	ras homolog gene family, member C	3	104591929	104597377	1	F2.2	ENSMUSG00000002233	FALSE	(ENSMUSG00000002233 ~ A_astrocyte_reference + A_endothelial_reference + A_microglia_reference + A_oligodendrocyte_reference) BIC = -32.03;(ENSMUSG00000002233 ~ A_endothelial_reference + A_microglia_reference + A_neuron_reference + A_oligodendrocyte_reference) BIC = -30.82;(ENSMUSG00000002233 ~ A_endothelial_reference + A_microglia_reference) BIC = -30.44	3	TRUE	A_astrocyte_reference = 2.1435;A_endothelial_reference = 3.2565;A_microglia_reference = 4.2175;A_oligodendrocyte_reference = 2.2238;A_neuron_reference = 1.8758	0.0320709	0.060681	0.0261604	2.47e-05	0.00112808
Tead3	TEA domain family member 3	17	28468616	28487750	-1	A3.3	ENSMUSG00000002249	FALSE	(ENSMUSG00000002249 ~ 1) BIC = -18.75;(ENSMUSG00000002249 ~ A_neuron_reference) BIC = -17.25;(ENSMUSG00000002249 ~ A_endothelial_reference) BIC = -16.83	3	TRUE	A_neuron_reference = 1.2946;A_endothelial_reference = 1.1381	NA	0.195452	NA	NA	0.255098
Ppard	peroxisome proliferator activator receptor delta	17	28369699	28438414	1	A3.3	ENSMUSG00000002250	FALSE	(ENSMUSG00000002250 ~ A_endothelial_reference) BIC = -52.63;(ENSMUSG00000002250 ~ A_endothelial_reference + A_oligodendrocyte_reference) BIC = -52.38;(ENSMUSG00000002250 ~ A_endothelial_reference + A_neuron_reference) BIC = -51.09;(ENSMUSG00000002250 ~ A_endothelial_reference + A_microglia_reference) BIC = -51.05;(ENSMUSG00000002250 ~ A_astrocyte_reference + A_endothelial_reference) BIC = -50.86	5	TRUE	A_endothelial_reference = 2.7341;A_oligodendrocyte_reference = 1.6511;A_neuron_reference = 1.2546;A_microglia_reference = 1.243;A_astrocyte_reference = 1.1736	0.240541	0.209616	0.098711	0.213854	0.00625424
Def6	differentially expressed in FDCP 6	17	28344723	28365553	1	A3.3	ENSMUSG00000002257	FALSE	(ENSMUSG00000002257 ~ A_endothelial_reference) BIC = 16.3;(ENSMUSG00000002257 ~ A_astrocyte_reference + A_endothelial_reference) BIC = 16.94;(ENSMUSG00000002257 ~ A_endothelial_reference + A_microglia_reference) BIC = 17.14;(ENSMUSG00000002257 ~ A_endothelial_reference + A_neuron_reference) BIC = 17.34	4	TRUE	A_endothelial_reference = 2.4961;A_astrocyte_reference = 1.5417;A_microglia_reference = 1.4829;A_neuron_reference = 1.4198	0.123157	0.155658	NA	0.138094	0.0125572
Peg3	paternally expressed 3	7	6656603	6683132	-1	A1	ENSMUSG00000002265	FALSE	(ENSMUSG00000002265 ~ A_endothelial_reference + A_microglia_reference + A_oligodendrocyte_reference) BIC = -18.15	1	FALSE	NA	NA	NA	1.5968e-05	0.692275	0.00339291
Zim1	zinc finger, imprinted 1	7	6628154	6649161	-1	A1	ENSMUSG00000002266	FALSE	(ENSMUSG00000002266 ~ A_endothelial_reference + A_microglia_reference) BIC = 27.1	1	FALSE	NA	NA	NA	NA	0.0208344	0.00304448
Metrn	meteorin, glial cell differentiation regulator	17	25931516	25934081	-1	A3.3	ENSMUSG00000002274	FALSE	(ENSMUSG00000002274 ~ A_astrocyte_reference + A_endothelial_reference) BIC = -25.15;(ENSMUSG00000002274 ~ A_endothelial_reference + A_microglia_reference + A_neuron_reference) BIC = -24.98;(ENSMUSG00000002274 ~ A_astrocyte_reference + A_endothelial_reference + A_neuron_reference) BIC = -24.53;(ENSMUSG00000002274 ~ A_endothelial_reference + A_microglia_reference + A_neuron_reference + A_oligodendr…	6	TRUE	A_astrocyte_reference = 2.5081;A_endothelial_reference = 2.6306;A_microglia_reference = 1.792;A_neuron_reference = 2.1141;A_oligodendrocyte_reference = 1.4606	0.0121376	0.0345053	0.144131	0.0731381	0.00852249
Lmf1	lipase maturation factor 1	17	25716119	25799771	1	A3.3	ENSMUSG00000002279	FALSE	(ENSMUSG00000002279 ~ A_endothelial_reference + A_neuron_reference) BIC = -68.47;(ENSMUSG00000002279 ~ A_endothelial_reference) BIC = -66.68;(ENSMUSG00000002279 ~ A_neuron_reference) BIC = -66.67	3	TRUE	A_endothelial_reference = 2.1295;A_neuron_reference = 2.1259	NA	0.0335125	NA	NA	0.0332151
Narfl	nuclear prelamin A recognition factor-like	17	25910721	25920277	1	A3.3	ENSMUSG00000002280	FALSE	(ENSMUSG00000002280 ~ A_endothelial_reference) BIC = -62.75	1	FALSE	NA	NA	NA	NA	NA	0.00415238
Angptl4	angiopoietin-like 4	17	33910695	33918520	-1	B1	ENSMUSG00000002289	FALSE	(ENSMUSG00000002289 ~ A_endothelial_reference + A_oligodendrocyte_reference) BIC = -1.55;(ENSMUSG00000002289 ~ A_astrocyte_reference + A_endothelial_reference + A_oligodendrocyte_reference) BIC = 0.03;(ENSMUSG00000002289 ~ A_endothelial_reference + A_neuron_reference + A_oligodendrocyte_reference) BIC = 0.22	3	TRUE	A_endothelial_reference = 2.6485;A_oligodendrocyte_reference = 3.4106;A_astrocyte_reference = 1.2142;A_neuron_reference = 1.1503	0.224688	0.25002	0.00064825	NA	0.00808604
Dbf4	DBF4 homolog (S. cerevisiae)	5	8396973	8422716	-1	A1	ENSMUSG00000002297	FALSE	(ENSMUSG00000002297 ~ A_astrocyte_reference + A_endothelial_reference) BIC = -30.19;(ENSMUSG00000002297 ~ A_endothelial_reference + A_microglia_reference) BIC = -28.85;(ENSMUSG00000002297 ~ A_astrocyte_reference + A_endothelial_reference + A_microglia_reference) BIC = -28.7;(ENSMUSG00000002297 ~ A_endothelial_reference + A_microglia_reference + A_neuron_reference) BIC = -28.33	4	TRUE	A_astrocyte_reference = 2.4225;A_endothelial_reference = 3.3312;A_microglia_reference = 1.7902;A_neuron_reference = 1.5433	0.015413	0.122764	NA	0.0734237	0.0008647
Daxx	Fas death domain-associated protein	17	34046359	34052534	1	B1	ENSMUSG00000002307	FALSE	(ENSMUSG00000002307 ~ A_microglia_reference + A_oligodendrocyte_reference) BIC = -78.4	1	FALSE	NA	NA	NA	0.0090392	2.59254e-05	NA
Cd320	CD320 antigen	17	33980036	33986719	1	B1	ENSMUSG00000002308	FALSE	(ENSMUSG00000002308 ~ A_microglia_reference + A_oligodendrocyte_reference) BIC = -54.14;(ENSMUSG00000002308 ~ A_astrocyte_reference + A_oligodendrocyte_reference) BIC = -53.39;(ENSMUSG00000002308 ~ A_endothelial_reference + A_microglia_reference + A_oligodendrocyte_reference) BIC = -53.24;(ENSMUSG00000002308 ~ A_astrocyte_reference + A_microglia_reference + A_oligodendrocyte_reference) BIC = -52.…	4	TRUE	A_microglia_reference = 2.1051;A_oligodendrocyte_reference = 3.8948;A_astrocyte_reference = 1.6432;A_endothelial_reference = 1.4342	0.100346	NA	9.829e-05	0.0352845	0.151519
Ipo4	importin 4	14	56244237	56256732	-1	C3	ENSMUSG00000002319	FALSE	(ENSMUSG00000002319 ~ A_microglia_reference) BIC = -50.61;(ENSMUSG00000002319 ~ A_microglia_reference + A_neuron_reference) BIC = -48.73;(ENSMUSG00000002319 ~ A_astrocyte_reference + A_microglia_reference) BIC = -48.64	3	TRUE	A_microglia_reference = 3.1265;A_neuron_reference = 1.131;A_astrocyte_reference = 1.0975	0.272443	0.258058	NA	0.00176876	NA
Tm9sf1	transmembrane 9 superfamily member 1	14	56254802	56262643	-1	C3	ENSMUSG00000002320	FALSE	(ENSMUSG00000002320 ~ 1) BIC = -66.5	1	FALSE	NA	NA	NA	NA	NA	NA
Rec8	REC8 homolog (yeast)	14	56236874	56244232	1	C3	ENSMUSG00000002324	FALSE	(ENSMUSG00000002324 ~ A_endothelial_reference) BIC = 19.74;(ENSMUSG00000002324 ~ 1) BIC = 19.87;(ENSMUSG00000002324 ~ A_microglia_reference) BIC = 21.45	3	TRUE	A_endothelial_reference = 1.7896;A_microglia_reference = 1.2646	NA	NA	NA	0.206014	0.0735155
Irf9	interferon regulatory factor 9	14	56222408	56228867	1	C3	ENSMUSG00000002325	FALSE	(ENSMUSG00000002325 ~ A_endothelial_reference) BIC = -27.19	1	FALSE	NA	NA	NA	NA	NA	0.00255438
Gmpr2	guanosine monophosphate reductase 2	14	56291072	56297587	1	C3	ENSMUSG00000002326	FALSE	(ENSMUSG00000002326 ~ A_endothelial_reference + A_neuron_reference) BIC = -74.81;(ENSMUSG00000002326 ~ A_neuron_reference + A_oligodendrocyte_reference) BIC = -74.33;(ENSMUSG00000002326 ~ A_neuron_reference) BIC = -73.68;(ENSMUSG00000002326 ~ A_astrocyte_reference + A_endothelial_reference) BIC = -73.34;(ENSMUSG00000002326 ~ A_endothelial_reference + A_neuron_reference + A_oligodendrocyte_referen…	5	TRUE	A_endothelial_reference = 1.8434;A_neuron_reference = 2.3025;A_oligodendrocyte_reference = 1.5719;A_astrocyte_reference = 2.6676	0.00763891	0.021309	0.115974	NA	0.0652706
Mdp1	magnesium-dependent phosphatase 1	14	56276716	56279345	-1	C3	ENSMUSG00000002329	FALSE	(ENSMUSG00000002329 ~ A_astrocyte_reference + A_oligodendrocyte_reference) BIC = -59.87;(ENSMUSG00000002329 ~ A_oligodendrocyte_reference) BIC = -59.38;(ENSMUSG00000002329 ~ A_astrocyte_reference + A_microglia_reference + A_oligodendrocyte_reference) BIC = -58.43;(ENSMUSG00000002329 ~ A_astrocyte_reference + A_neuron_reference + A_oligodendrocyte_reference) BIC = -57.96	4	TRUE	A_astrocyte_reference = 1.9134;A_oligodendrocyte_reference = 2.4941;A_microglia_reference = 1.2655;A_neuron_reference = 1.0997	0.0557002	0.271479	0.012627	0.205701	NA
Dhrs1	dehydrogenase/reductase (SDR family) member 1	14	56357857	56364527	-1	C3	ENSMUSG00000002332	FALSE	(ENSMUSG00000002332 ~ A_endothelial_reference) BIC = -58.95;(ENSMUSG00000002332 ~ A_endothelial_reference + A_neuron_reference) BIC = -58.59;(ENSMUSG00000002332 ~ A_endothelial_reference + A_neuron_reference + A_oligodendrocyte_reference) BIC = -58.49;(ENSMUSG00000002332 ~ A_neuron_reference + A_oligodendrocyte_reference) BIC = -57.34	4	TRUE	A_endothelial_reference = 2.3804;A_neuron_reference = 1.6412;A_oligodendrocyte_reference = 1.8341	NA	0.100748	0.0666457	NA	0.0172943
Ncan	neurocan	8	72616984	72644772	-1	B3.3	ENSMUSG00000002341	FALSE	(ENSMUSG00000002341 ~ A_neuron_reference) BIC = -44.2;(ENSMUSG00000002341 ~ A_neuron_reference + A_oligodendrocyte_reference) BIC = -42.64	2	TRUE	A_neuron_reference = 2.6404;A_oligodendrocyte_reference = 1.2484	NA	0.00828044	0.211882	NA	NA
Tmem161a	transmembrane protein 161A	8	72696255	72707580	1	B3.3	ENSMUSG00000002342	FALSE	(ENSMUSG00000002342 ~ A_endothelial_reference) BIC = -67.66;(ENSMUSG00000002342 ~ A_endothelial_reference + A_microglia_reference) BIC = -67.14;(ENSMUSG00000002342 ~ A_microglia_reference) BIC = -65.84	3	TRUE	A_endothelial_reference = 2.2137;A_microglia_reference = 1.6783	NA	NA	NA	0.0932931	0.0268521
Armc6	armadillo repeat containing 6	8	72744071	72758365	-1	B3.3	ENSMUSG00000002343	FALSE	(ENSMUSG00000002343 ~ A_oligodendrocyte_reference) BIC = -54.03;(ENSMUSG00000002343 ~ A_astrocyte_reference + A_oligodendrocyte_reference) BIC = -52.28	2	TRUE	A_oligodendrocyte_reference = 2.9749;A_astrocyte_reference = 1.1835	0.236615	NA	0.00293121	NA	NA
2310045N01Rik	RIKEN cDNA 2310045N01 gene	8	72663398	72691387	1	B3.3	ENSMUSG00000002345	FALSE	(ENSMUSG00000002345 ~ A_neuron_reference + A_oligodendrocyte_reference) BIC = -81.26;(ENSMUSG00000002345 ~ A_oligodendrocyte_reference) BIC = -81.2;(ENSMUSG00000002345 ~ A_microglia_reference + A_oligodendrocyte_reference) BIC = -79.84;(ENSMUSG00000002345 ~ A_microglia_reference + A_neuron_reference + A_oligodendrocyte_reference) BIC = -79.3	4	TRUE	A_neuron_reference = 1.6759;A_oligodendrocyte_reference = 5.1173;A_microglia_reference = 1.2073	NA	0.0937531	3.1e-07	0.227307	NA
Slc25a42	solute carrier family 25, member 42	8	72708239	72736204	-1	B3.3	ENSMUSG00000002346	FALSE	(ENSMUSG00000002346 ~ A_astrocyte_reference + A_endothelial_reference + A_microglia_reference) BIC = -43.01;(ENSMUSG00000002346 ~ A_astrocyte_reference + A_microglia_reference) BIC = -42.28	2	TRUE	A_astrocyte_reference = 3.0109;A_endothelial_reference = 1.869;A_microglia_reference = 2.7028	0.00260511	NA	NA	0.00687539	0.061625
Snx9	sorting nexin 9	17	5841346	5931946	1	A1	ENSMUSG00000002365	FALSE	(ENSMUSG00000002365 ~ A_microglia_reference) BIC = -48.16;(ENSMUSG00000002365 ~ A_astrocyte_reference + A_microglia_reference) BIC = -47.42;(ENSMUSG00000002365 ~ A_microglia_reference + A_oligodendrocyte_reference) BIC = -47.37;(ENSMUSG00000002365 ~ A_microglia_reference + A_neuron_reference) BIC = -46.93	4	TRUE	A_microglia_reference = 3.2248;A_astrocyte_reference = 1.5104;A_oligodendrocyte_reference = 1.4953;A_neuron_reference = 1.3602	0.13093	0.173766	0.134836	0.00126051	NA
Ranbp3	RAN binding protein 3	17	56812680	56851192	1	D	ENSMUSG00000002372	FALSE	(ENSMUSG00000002372 ~ A_oligodendrocyte_reference) BIC = -61.71;(ENSMUSG00000002372 ~ A_neuron_reference + A_oligodendrocyte_reference) BIC = -60.05	2	TRUE	A_oligodendrocyte_reference = 2.703;A_neuron_reference = 1.2128	NA	0.225221	0.00687258	NA	NA
Ndufa11	NADH dehydrogenase (ubiquinone) 1 alpha subcomplex 11	17	56857185	56863671	1	D	ENSMUSG00000002379	FALSE	(ENSMUSG00000002379 ~ A_neuron_reference + A_oligodendrocyte_reference) BIC = -41.06	1	FALSE	NA	NA	0.000541568	0.00112472	NA	NA
Nr2f6	nuclear receptor subfamily 2, group F, member 6	8	73898022	73905859	-1	B3.3	ENSMUSG00000002393	FALSE	(ENSMUSG00000002393 ~ A_oligodendrocyte_reference) BIC = -44.84;(ENSMUSG00000002393 ~ A_astrocyte_reference + A_oligodendrocyte_reference) BIC = -43.79	2	TRUE	A_oligodendrocyte_reference = 3.979;A_astrocyte_reference = 1.4197	0.155701	NA	6.919e-05	NA	NA
Use1	unconventional SNARE in the ER 1 homolog (S. cerevisiae)	8	73890747	73893631	1	B3.3	ENSMUSG00000002395	FALSE	(ENSMUSG00000002395 ~ A_endothelial_reference + A_neuron_reference + A_oligodendrocyte_reference) BIC = -54.94	1	FALSE	NA	NA	0.0517989	0.0310672	NA	0.000642414
Ocel1	occludin/ELL domain containing 1	8	73895197	73903260	1	B3.3	ENSMUSG00000002396	FALSE	(ENSMUSG00000002396 ~ 1) BIC = -46.75;(ENSMUSG00000002396 ~ A_endothelial_reference) BIC = -45.32;(ENSMUSG00000002396 ~ A_astrocyte_reference) BIC = -45.02	3	TRUE	A_endothelial_reference = 1.3209;A_astrocyte_reference = 1.2124	0.225345	NA	NA	NA	0.186545
Dyrk1b	dual-specificity tyrosine-(Y)-phosphorylation regulated kinase 1b	7	28964488	28972313	1	A3	ENSMUSG00000002409	FALSE	(ENSMUSG00000002409 ~ A_microglia_reference) BIC = -38.26;(ENSMUSG00000002409 ~ A_astrocyte_reference) BIC = -36.59	2	TRUE	A_microglia_reference = 2.2493;A_astrocyte_reference = 1.843	0.0653278	NA	NA	0.0244951	NA
Braf	Braf transforming gene	6	39553236	39675462	-1	B1	ENSMUSG00000002413	FALSE	(ENSMUSG00000002413 ~ A_neuron_reference + A_oligodendrocyte_reference) BIC = -40.87;(ENSMUSG00000002413 ~ A_endothelial_reference + A_oligodendrocyte_reference) BIC = -40.21;(ENSMUSG00000002413 ~ A_endothelial_reference + A_neuron_reference + A_oligodendrocyte_reference) BIC = -40.07;(ENSMUSG00000002413 ~ A_endothelial_reference) BIC = -39.18	4	TRUE	A_neuron_reference = 1.9211;A_oligodendrocyte_reference = 2.0183;A_endothelial_reference = 1.7994	NA	0.0547209	0.0435637	NA	0.0719536
Ndufb2	NADH dehydrogenase (ubiquinone) 1 beta subcomplex, 2	6	39542573	39553381	1	B1	ENSMUSG00000002416	FALSE	(ENSMUSG00000002416 ~ A_neuron_reference) BIC = -63.45	1	FALSE	NA	NA	0.000178563	NA	NA	NA
Hltf	helicase-like transcription factor	3	19957811	20018376	1	A2	ENSMUSG00000002428	FALSE	(ENSMUSG00000002428 ~ A_microglia_reference + A_oligodendrocyte_reference) BIC = -60.32;(ENSMUSG00000002428 ~ A_microglia_reference) BIC = -58.85;(ENSMUSG00000002428 ~ A_microglia_reference + A_neuron_reference + A_oligodendrocyte_reference) BIC = -58.63;(ENSMUSG00000002428 ~ A_endothelial_reference + A_microglia_reference + A_oligodendrocyte_reference) BIC = -58.43	4	TRUE	A_microglia_reference = 2.3052;A_oligodendrocyte_reference = 1.9273;A_neuron_reference = 1.1759;A_endothelial_reference = 1.1027	NA	0.239623	0.0539385	0.0211547	0.270147
Prpf6	PRP6 pre-mRNA splicing factor 6 homolog (yeast)	2	181326573	181390365	1	H4	ENSMUSG00000002455	FALSE	(ENSMUSG00000002455 ~ A_endothelial_reference) BIC = -91.12;(ENSMUSG00000002455 ~ A_astrocyte_reference + A_endothelial_reference) BIC = -90.55;(ENSMUSG00000002455 ~ A_endothelial_reference + A_neuron_reference) BIC = -89.87;(ENSMUSG00000002455 ~ A_endothelial_reference + A_microglia_reference) BIC = -89.58	4	TRUE	A_endothelial_reference = 2.498;A_astrocyte_reference = 1.5614;A_neuron_reference = 1.3524;A_microglia_reference = 1.255	0.118433	0.176255	NA	0.209482	0.012489
Rgs19	regulator of G-protein signaling 19	2	181423124	181428682	-1	H4	ENSMUSG00000002458	FALSE	(ENSMUSG00000002458 ~ A_neuron_reference + A_oligodendrocyte_reference) BIC = -50.89;(ENSMUSG00000002458 ~ A_oligodendrocyte_reference) BIC = -49.5	2	TRUE	A_neuron_reference = 2.0653;A_oligodendrocyte_reference = 3.5935	NA	0.038892	0.00032623	NA	NA
Rgs20	regulator of G-protein signaling 20	1	4899657	5060366	-1	A1	ENSMUSG00000002459	FALSE	(ENSMUSG00000002459 ~ A_microglia_reference + A_neuron_reference) BIC = -16.77;(ENSMUSG00000002459 ~ A_neuron_reference) BIC = -16.35;(ENSMUSG00000002459 ~ A_microglia_reference) BIC = -15.08	3	TRUE	A_microglia_reference = 1.9661;A_neuron_reference = 2.4052	NA	0.016163	NA	0.0492927	NA
Abhd3	abhydrolase domain containing 3	18	10644409	10706769	-1	A1	ENSMUSG00000002475	FALSE	(ENSMUSG00000002475 ~ A_neuron_reference) BIC = -38.86	1	FALSE	NA	NA	7.4668e-06	NA	NA	NA
Snrpd1	small nuclear ribonucleoprotein D1	18	10617794	10628228	1	A1	ENSMUSG00000002477	FALSE	(ENSMUSG00000002477 ~ 1) BIC = -52.09;(ENSMUSG00000002477 ~ A_neuron_reference + A_oligodendrocyte_reference) BIC = -51.74;(ENSMUSG00000002477 ~ A_endothelial_reference) BIC = -50.53	3	TRUE	A_neuron_reference = 2.3598;A_oligodendrocyte_reference = 2.1939;A_endothelial_reference = 1.2744	NA	0.018284	0.0282454	NA	0.202534
Tchp	trichoplein, keratin filament binding	5	115157769	115172336	1	F	ENSMUSG00000002486	FALSE	(ENSMUSG00000002486 ~ A_microglia_reference) BIC = -33.41	1	FALSE	NA	NA	NA	NA	0.0094478	NA
Tiam1	T cell lymphoma invasion and metastasis 1	16	89787356	90144014	-1	C3.3	ENSMUSG00000002489	FALSE	(ENSMUSG00000002489 ~ A_endothelial_reference + A_neuron_reference) BIC = -30.66	1	FALSE	NA	NA	0.0012925	NA	NA	0.0223853
Tsc2	tuberous sclerosis 2	17	24732882	24769574	-1	A3.3	ENSMUSG00000002496	FALSE	(ENSMUSG00000002496 ~ A_microglia_reference) BIC = -52.34;(ENSMUSG00000002496 ~ A_microglia_reference + A_oligodendrocyte_reference) BIC = -50.64	2	TRUE	A_microglia_reference = 3.2666;A_oligodendrocyte_reference = 1.1994	NA	NA	0.230366	0.00108834	NA
Slc9a3r2	solute carrier family 9 (sodium/hydrogen exchanger), member 3 regulator 2	17	24776227	24787250	-1	A3.3	ENSMUSG00000002504	FALSE	(ENSMUSG00000002504 ~ A_endothelial_reference + A_neuron_reference) BIC = -13.88;(ENSMUSG00000002504 ~ A_endothelial_reference + A_microglia_reference + A_neuron_reference) BIC = -13.49;(ENSMUSG00000002504 ~ A_astrocyte_reference + A_endothelial_reference + A_neuron_reference) BIC = -12.8	3	TRUE	A_endothelial_reference = 2.9002;A_neuron_reference = 2.3879;A_microglia_reference = 1.5793;A_astrocyte_reference = 1.3796	0.16772	0.016945	NA	0.114273	0.0037292
Puf60	poly-U binding splicing factor 60	15	75900614	75911376	-1	D3	ENSMUSG00000002524	FALSE	(ENSMUSG00000002524 ~ A_neuron_reference + A_oligodendrocyte_reference) BIC = -61.5;(ENSMUSG00000002524 ~ A_oligodendrocyte_reference) BIC = -59.85	2	TRUE	A_neuron_reference = 2.1252;A_oligodendrocyte_reference = 2.2662	NA	0.0335703	0.0234414	NA	NA
Golga2	golgi autoantigen, golgin subfamily a, 2	2	32142904	32163441	1	B	ENSMUSG00000002546	FALSE	(ENSMUSG00000002546 ~ 1) BIC = -85.79;(ENSMUSG00000002546 ~ A_microglia_reference + A_neuron_reference) BIC = -85.62;(ENSMUSG00000002546 ~ A_microglia_reference + A_oligodendrocyte_reference) BIC = -85.26;(ENSMUSG00000002546 ~ A_microglia_reference) BIC = -84.71	4	TRUE	A_microglia_reference = 1.8999;A_neuron_reference = 1.9527;A_oligodendrocyte_reference = 1.8627	NA	0.0508592	0.0625048	0.0574479	NA
Uck1	uridine-cytidine kinase 1	2	32110522	32115679	-1	B	ENSMUSG00000002550	FALSE	(ENSMUSG00000002550 ~ A_astrocyte_reference + A_oligodendrocyte_reference) BIC = -82.26;(ENSMUSG00000002550 ~ A_oligodendrocyte_reference) BIC = -82.12;(ENSMUSG00000002550 ~ A_astrocyte_reference + A_endothelial_reference + A_oligodendrocyte_reference) BIC = -80.99;(ENSMUSG00000002550 ~ A_endothelial_reference + A_oligodendrocyte_reference) BIC = -80.52;(ENSMUSG00000002550 ~ A_neuron_reference + …	5	TRUE	A_astrocyte_reference = 1.773;A_oligodendrocyte_reference = 3.0865;A_endothelial_reference = 1.2808;A_neuron_reference = 1.1653	0.076231	0.243891	0.00202524	NA	0.20028
Ikzf4	IKAROS family zinc finger 4	10	128067899	128083047	-1	D3	ENSMUSG00000002578	FALSE	(ENSMUSG00000002578 ~ A_neuron_reference) BIC = -40.6	1	FALSE	NA	NA	2.24281e-09	NA	NA	NA
1810046J19Rik	RIKEN cDNA 1810046J19 gene	11	98299022	98300305	-1	D	ENSMUSG00000002580	FALSE	(ENSMUSG00000002580 ~ A_astrocyte_reference + A_endothelial_reference + A_oligodendrocyte_reference) BIC = -36.72;(ENSMUSG00000002580 ~ A_neuron_reference + A_oligodendrocyte_reference) BIC = -36.52;(ENSMUSG00000002580 ~ A_endothelial_reference + A_microglia_reference + A_neuron_reference + A_oligodendrocyte_reference) BIC = -35.8;(ENSMUSG00000002580 ~ A_endothelial_reference) BIC = -35.55;(ENSMU…	8	TRUE	A_astrocyte_reference = 1.8478;A_endothelial_reference = 1.9281;A_oligodendrocyte_reference = 2.2386;A_neuron_reference = 2.0675;A_microglia_reference = 1.5299	0.0646261	0.0386838	0.0251837	0.126053	0.0538449
Axl	AXL receptor tyrosine kinase	7	26542292	26573724	-1	A3	ENSMUSG00000002602	FALSE	(ENSMUSG00000002602 ~ A_endothelial_reference + A_microglia_reference + A_oligodendrocyte_reference) BIC = -65.71;(ENSMUSG00000002602 ~ A_endothelial_reference + A_oligodendrocyte_reference) BIC = -65.44;(ENSMUSG00000002602 ~ A_neuron_reference) BIC = -64.82;(ENSMUSG00000002602 ~ A_endothelial_reference + A_microglia_reference + A_neuron_reference) BIC = -64.74;(ENSMUSG00000002602 ~ A_endothelial…	6	TRUE	A_endothelial_reference = 2.2282;A_microglia_reference = 1.7502;A_oligodendrocyte_reference = 2.6281;A_neuron_reference = 2.4301	NA	0.0150935	0.00858591	0.0800801	0.0258639
Tgfb1	transforming growth factor, beta 1	7	26472021	26490096	1	A3	ENSMUSG00000002603	FALSE	(ENSMUSG00000002603 ~ A_endothelial_reference + A_microglia_reference + A_neuron_reference + A_oligodendrocyte_reference) BIC = -20.82;(ENSMUSG00000002603 ~ A_astrocyte_reference + A_endothelial_reference + A_microglia_reference + A_neuron_reference + A_oligodendrocyte_reference) BIC = -19.46;(ENSMUSG00000002603 ~ A_endothelial_reference + A_microglia_reference + A_oligodendrocyte_reference) BIC …	3	TRUE	A_endothelial_reference = 3.7571;A_microglia_reference = 3.407;A_neuron_reference = 2.0027;A_oligodendrocyte_reference = 2.3454;A_astrocyte_reference = 1.2368	0.216154	0.0452053	0.0190074	0.0006567	0.00017188
Ccdc97	coiled-coil domain containing 97	7	26496125	26504107	-1	A3	ENSMUSG00000002608	FALSE	(ENSMUSG00000002608 ~ 1) BIC = -66.91;(ENSMUSG00000002608 ~ A_neuron_reference) BIC = -65.99;(ENSMUSG00000002608 ~ A_endothelial_reference) BIC = -65.91;(ENSMUSG00000002608 ~ A_endothelial_reference + A_neuron_reference) BIC = -65.1	4	TRUE	A_neuron_reference = 1.4876;A_endothelial_reference = 1.4629	NA	0.136853	NA	NA	0.143481
Zfp40	zinc finger protein 40	17	23310836	23330219	-1	A3.3	ENSMUSG00000002617	FALSE	(ENSMUSG00000002617 ~ A_endothelial_reference + A_neuron_reference) BIC = -43.97;(ENSMUSG00000002617 ~ A_astrocyte_reference + A_endothelial_reference) BIC = -43.4	2	TRUE	A_endothelial_reference = 2.54;A_neuron_reference = 3.0102;A_astrocyte_reference = 2.9033	0.0036923	0.00261045	NA	NA	0.011085
Akap8l	A kinase (PRKA) anchor protein 8-like	17	32458370	32487540	-1	B1	ENSMUSG00000002625	FALSE	(ENSMUSG00000002625 ~ A_endothelial_reference + A_microglia_reference) BIC = -23.6;(ENSMUSG00000002625 ~ A_endothelial_reference + A_microglia_reference + A_oligodendrocyte_reference) BIC = -21.9	2	TRUE	A_endothelial_reference = 3.0981;A_microglia_reference = 2.9962;A_oligodendrocyte_reference = 1.1739	NA	NA	0.240421	0.00273324	0.00194765
Shh	sonic hedgehog	5	28783355	28793641	-1	B1	ENSMUSG00000002633	FALSE	(ENSMUSG00000002633 ~ A_microglia_reference + A_neuron_reference) BIC = -13.24;(ENSMUSG00000002633 ~ A_neuron_reference) BIC = -12.48;(ENSMUSG00000002633 ~ A_astrocyte_reference + A_microglia_reference + A_neuron_reference) BIC = -11.87;(ENSMUSG00000002633 ~ A_microglia_reference + A_neuron_reference + A_oligodendrocyte_reference) BIC = -11.45	4	TRUE	A_microglia_reference = 1.9797;A_neuron_reference = 5.0565;A_astrocyte_reference = 1.2864;A_oligodendrocyte_reference = 1.142	0.19829	4.3e-07	0.253435	0.0477341	NA
Pdcd2l	programmed cell death 2-like	7	34969518	34981680	-1	B1	ENSMUSG00000002635	FALSE	(ENSMUSG00000002635 ~ A_oligodendrocyte_reference) BIC = -49.78;(ENSMUSG00000002635 ~ A_neuron_reference + A_oligodendrocyte_reference) BIC = -49.32;(ENSMUSG00000002635 ~ A_astrocyte_reference + A_oligodendrocyte_reference) BIC = -48.68	3	TRUE	A_oligodendrocyte_reference = 3.2981;A_neuron_reference = 1.593;A_astrocyte_reference = 1.402	0.160911	0.111159	0.00097339	NA	NA
Gtf2f1	general transcription factor IIF, polypeptide 1	17	57142826	57150723	-1	D	ENSMUSG00000002658	FALSE	(ENSMUSG00000002658 ~ A_oligodendrocyte_reference) BIC = -82.81;(ENSMUSG00000002658 ~ A_neuron_reference + A_oligodendrocyte_reference) BIC = -81.06	2	TRUE	A_oligodendrocyte_reference = 3.9029;A_neuron_reference = 1.1803	NA	0.237875	9.504e-05	NA	NA
Clpp	caseinolytic peptidase, ATP-dependent, proteolytic subunit homolog (E. coli)	17	57129687	57135794	1	D	ENSMUSG00000002660	FALSE	(ENSMUSG00000002660 ~ A_neuron_reference + A_oligodendrocyte_reference) BIC = -56.05;(ENSMUSG00000002660 ~ 1) BIC = -55.54;(ENSMUSG00000002660 ~ A_astrocyte_reference + A_oligodendrocyte_reference) BIC = -54.07	3	TRUE	A_neuron_reference = 2.5527;A_oligodendrocyte_reference = 2.0171;A_astrocyte_reference = 2.129	0.0332556	0.0106893	0.0436898	NA	NA
Alkbh7	alkB, alkylation repair homolog 7 (E. coli)	17	57136762	57138745	1	D	ENSMUSG00000002661	FALSE	(ENSMUSG00000002661 ~ A_astrocyte_reference + A_microglia_reference + A_oligodendrocyte_reference) BIC = -39.86;(ENSMUSG00000002661 ~ A_astrocyte_reference + A_endothelial_reference + A_microglia_reference + A_oligodendrocyte_reference) BIC = -39.55	2	TRUE	A_astrocyte_reference = 3.1352;A_microglia_reference = 2.8619;A_oligodendrocyte_reference = 2.4998;A_endothelial_reference = 1.567	0.00171728	NA	0.0124262	0.0042105	0.117124
Dennd1c	DENN/MADD domain containing 1C	17	57205479	57217933	-1	D	ENSMUSG00000002668	FALSE	(ENSMUSG00000002668 ~ A_neuron_reference) BIC = -3.9;(ENSMUSG00000002668 ~ A_endothelial_reference + A_oligodendrocyte_reference) BIC = -3.74;(ENSMUSG00000002668 ~ A_endothelial_reference + A_neuron_reference) BIC = -2.61;(ENSMUSG00000002668 ~ A_astrocyte_reference + A_endothelial_reference + A_oligodendrocyte_reference) BIC = -1.91	4	TRUE	A_neuron_reference = 3.6134;A_endothelial_reference = 1.8579;A_oligodendrocyte_reference = 3.1046;A_astrocyte_reference = 1.1299	0.258521	0.00030223	0.00190517	NA	0.0631764
Med6	mediator of RNA polymerase II transcription, subunit 6 homolog (yeast)	12	82674544	82695995	-1	D1	ENSMUSG00000002679	FALSE	(ENSMUSG00000002679 ~ A_oligodendrocyte_reference) BIC = -59.03;(ENSMUSG00000002679 ~ 1) BIC = -58.35;(ENSMUSG00000002679 ~ A_neuron_reference + A_oligodendrocyte_reference) BIC = -57.81	3	TRUE	A_oligodendrocyte_reference = 1.7287;A_neuron_reference = 1.3646	NA	0.172368	0.0838567	NA	NA
Prkd1	protein kinase D1	12	51442218	51750210	-1	B3	ENSMUSG00000002688	FALSE	(ENSMUSG00000002688 ~ A_endothelial_reference + A_oligodendrocyte_reference) BIC = -28.42;(ENSMUSG00000002688 ~ A_endothelial_reference + A_neuron_reference) BIC = -27.59;(ENSMUSG00000002688 ~ A_neuron_reference) BIC = -27.28	3	TRUE	A_endothelial_reference = 2.1349;A_oligodendrocyte_reference = 3.627;A_neuron_reference = 3.4308	NA	0.00060181	0.00028672	NA	0.0327716
Lcp2	lymphocyte cytosolic protein 2	11	33946920	33992295	1	A4	ENSMUSG00000002699	FALSE	(ENSMUSG00000002699 ~ A_neuron_reference) BIC = -30.5;(ENSMUSG00000002699 ~ A_endothelial_reference + A_microglia_reference + A_neuron_reference) BIC = -30.28;(ENSMUSG00000002699 ~ A_microglia_reference + A_neuron_reference) BIC = -30.22	3	TRUE	A_neuron_reference = 4.805;A_endothelial_reference = 1.7011;A_microglia_reference = 1.8309	NA	1.55e-06	NA	0.0671085	0.0889287
Cse1l	chromosome segregation 1-like (S. cerevisiae)	2	166731540	166771889	1	H3	ENSMUSG00000002718	FALSE	(ENSMUSG00000002718 ~ A_neuron_reference) BIC = -73.98;(ENSMUSG00000002718 ~ A_endothelial_reference + A_neuron_reference) BIC = -72.47	2	TRUE	A_neuron_reference = 2.5697;A_endothelial_reference = 1.2649	NA	0.0101785	NA	NA	0.205906
Naa20	N(alpha)-acetyltransferase 20, NatB catalytic subunit	2	145727835	145742161	1	G1	ENSMUSG00000002728	FALSE	(ENSMUSG00000002728 ~ A_endothelial_reference + A_neuron_reference) BIC = -56.41;(ENSMUSG00000002728 ~ A_neuron_reference) BIC = -55.57;(ENSMUSG00000002728 ~ A_neuron_reference + A_oligodendrocyte_reference) BIC = -55.42;(ENSMUSG00000002728 ~ A_astrocyte_reference + A_neuron_reference) BIC = -54.79;(ENSMUSG00000002728 ~ A_astrocyte_reference + A_endothelial_reference + A_neuron_reference) BIC = -…	5	TRUE	A_endothelial_reference = 1.8249;A_neuron_reference = 2.8105;A_oligodendrocyte_reference = 1.6811;A_astrocyte_reference = 1.278	0.201239	0.00494595	0.0927339	NA	0.0680174
Prkra	protein kinase, interferon inducible double stranded RNA dependent activator	2	76467955	76486072	-1	C3	ENSMUSG00000002731	FALSE	(ENSMUSG00000002731 ~ A_neuron_reference) BIC = -41.68;(ENSMUSG00000002731 ~ A_microglia_reference + A_neuron_reference) BIC = -41.17	2	TRUE	A_neuron_reference = 2.5293;A_microglia_reference = 1.5798	NA	0.0114288	NA	0.114163	NA
Fkbp7	FK506 binding protein 7	2	76501101	76511173	-1	C3	ENSMUSG00000002732	FALSE	(ENSMUSG00000002732 ~ A_astrocyte_reference + A_microglia_reference + A_neuron_reference) BIC = -8.09;(ENSMUSG00000002732 ~ A_microglia_reference) BIC = -7.73;(ENSMUSG00000002732 ~ A_microglia_reference + A_neuron_reference) BIC = -6.91;(ENSMUSG00000002732 ~ A_endothelial_reference + A_microglia_reference) BIC = -6.1	4	TRUE	A_astrocyte_reference = 1.9737;A_microglia_reference = 2.6409;A_neuron_reference = 1.8176;A_endothelial_reference = 1.2261	0.0484109	0.0691292	NA	0.00826849	0.220143
Plekha3	pleckstrin homology domain-containing, family A (phosphoinositide binding specific) member 3	2	76513338	76534885	1	C3	ENSMUSG00000002733	FALSE	(ENSMUSG00000002733 ~ A_microglia_reference) BIC = -60.78;(ENSMUSG00000002733 ~ A_astrocyte_reference) BIC = -60.66;(ENSMUSG00000002733 ~ 1) BIC = -59.3;(ENSMUSG00000002733 ~ A_astrocyte_reference + A_neuron_reference) BIC = -59.07	4	TRUE	A_microglia_reference = 2.1272;A_astrocyte_reference = 1.896;A_neuron_reference = 1.2385	0.0579664	0.215518	NA	0.0334065	NA
Ykt6	YKT6 homolog (S. Cerevisiae)	11	5855696	5867783	1	A1	ENSMUSG00000002741	FALSE	(ENSMUSG00000002741 ~ A_oligodendrocyte_reference) BIC = -86.58	1	FALSE	NA	NA	NA	5.93323e-08	NA	NA
Baz1b	bromodomain adjacent to zinc finger domain, 1B	5	135663134	135721999	1	G2	ENSMUSG00000002748	FALSE	(ENSMUSG00000002748 ~ 1) BIC = -61.81	1	FALSE	NA	NA	NA	NA	NA	NA
Pex6	peroxisomal biogenesis factor 6	17	46848412	46862490	1	C	ENSMUSG00000002763	FALSE	(ENSMUSG00000002763 ~ A_astrocyte_reference + A_oligodendrocyte_reference) BIC = -64.18;(ENSMUSG00000002763 ~ A_astrocyte_reference + A_endothelial_reference + A_oligodendrocyte_reference) BIC = -63.4;(ENSMUSG00000002763 ~ A_oligodendrocyte_reference) BIC = -62.31	3	TRUE	A_astrocyte_reference = 2.2044;A_oligodendrocyte_reference = 3.3845;A_endothelial_reference = 1.4687	0.0274982	NA	0.00071308	NA	0.141906
Mrpl2	mitochondrial ribosomal protein L2	17	46783178	46787088	1	C	ENSMUSG00000002767	FALSE	(ENSMUSG00000002767 ~ A_astrocyte_reference + A_neuron_reference + A_oligodendrocyte_reference) BIC = -46.2	1	FALSE	NA	0.0188144	0.103797	0.000387483	NA	NA
Mea1	male enhanced antigen 1	17	46818086	46820054	1	C	ENSMUSG00000002768	FALSE	(ENSMUSG00000002768 ~ A_oligodendrocyte_reference) BIC = -45.51;(ENSMUSG00000002768 ~ A_neuron_reference + A_oligodendrocyte_reference) BIC = -43.88	2	TRUE	A_oligodendrocyte_reference = 3.5904;A_neuron_reference = 1.225	NA	0.220575	0.00033011	NA	NA
Grin2d	glutamate receptor, ionotropic, NMDA2D (epsilon 4)	7	53087253	53126298	-1	B4	ENSMUSG00000002771	FALSE	(ENSMUSG00000002771 ~ A_microglia_reference + A_oligodendrocyte_reference) BIC = -19.93;(ENSMUSG00000002771 ~ A_astrocyte_reference + A_microglia_reference + A_oligodendrocyte_reference) BIC = -19.67;(ENSMUSG00000002771 ~ A_microglia_reference + A_neuron_reference + A_oligodendrocyte_reference) BIC = -19.19;(ENSMUSG00000002771 ~ A_microglia_reference + A_neuron_reference) BIC = -18.86	4	TRUE	A_microglia_reference = 2.3829;A_oligodendrocyte_reference = 2.5039;A_astrocyte_reference = 1.6159;A_neuron_reference = 1.8837	0.106115	0.0596107	0.0122833	0.0171775	NA
Kdelr1	KDEL (Lys-Asp-Glu-Leu) endoplasmic reticulum protein retention receptor 1	7	53128142	53139101	1	B4	ENSMUSG00000002778	FALSE	(ENSMUSG00000002778 ~ A_oligodendrocyte_reference) BIC = -66.72;(ENSMUSG00000002778 ~ A_endothelial_reference + A_oligodendrocyte_reference) BIC = -65.71;(ENSMUSG00000002778 ~ A_microglia_reference + A_oligodendrocyte_reference) BIC = -65.31;(ENSMUSG00000002778 ~ A_endothelial_reference + A_microglia_reference + A_oligodendrocyte_reference) BIC = -65.19	4	TRUE	A_oligodendrocyte_reference = 4.2226;A_endothelial_reference = 1.5183;A_microglia_reference = 1.4089	NA	NA	2.415e-05	0.158871	0.128937
Tmem143	transmembrane protein 143	7	53152311	53172783	1	B4	ENSMUSG00000002781	FALSE	(ENSMUSG00000002781 ~ 1) BIC = -50.14;(ENSMUSG00000002781 ~ A_endothelial_reference) BIC = -48.67;(ENSMUSG00000002781 ~ A_neuron_reference) BIC = -48.24	3	TRUE	A_endothelial_reference = 1.308;A_neuron_reference = 1.1493	NA	0.25042	NA	NA	0.190858
Ggct	gamma-glutamyl cyclotransferase	6	54932574	54942944	-1	B3	ENSMUSG00000002797	FALSE	(ENSMUSG00000002797 ~ 1) BIC = -51.6;(ENSMUSG00000002797 ~ A_astrocyte_reference + A_oligodendrocyte_reference) BIC = -51.13;(ENSMUSG00000002797 ~ A_oligodendrocyte_reference) BIC = -51.07;(ENSMUSG00000002797 ~ A_astrocyte_reference + A_microglia_reference + A_oligodendrocyte_reference) BIC = -50.03	4	TRUE	A_astrocyte_reference = 1.7928;A_oligodendrocyte_reference = 1.812;A_microglia_reference = 1.3738	0.0730105	NA	0.0699856	0.169509	NA
Jag2	jagged 2	12	114146801	114167706	-1	F1	ENSMUSG00000002799	FALSE	(ENSMUSG00000002799 ~ A_microglia_reference) BIC = -38.89;(ENSMUSG00000002799 ~ A_endothelial_reference + A_microglia_reference) BIC = -38.07;(ENSMUSG00000002799 ~ A_astrocyte_reference + A_microglia_reference) BIC = -37.71;(ENSMUSG00000002799 ~ A_astrocyte_reference + A_endothelial_reference + A_microglia_reference) BIC = -37.14	4	TRUE	A_microglia_reference = 2.635;A_endothelial_reference = 1.5046;A_astrocyte_reference = 1.3964	0.162608	NA	NA	0.00841375	0.132432
Btbd6	BTB (POZ) domain containing 6	12	114214693	114217141	1	F1	ENSMUSG00000002803	FALSE	(ENSMUSG00000002803 ~ A_oligodendrocyte_reference) BIC = -76.53	1	FALSE	NA	NA	NA	0.00089486	NA	NA
Nudt14	nudix (nucleoside diphosphate linked moiety X)-type motif 14	12	114172944	114180329	-1	F1	ENSMUSG00000002804	FALSE	(ENSMUSG00000002804 ~ A_oligodendrocyte_reference) BIC = -18.41	1	FALSE	NA	NA	NA	6.6643e-05	NA	NA
Epdr1	ependymin related protein 1 (zebrafish)	13	19683578	19711699	-1	A2	ENSMUSG00000002808	FALSE	(ENSMUSG00000002808 ~ A_neuron_reference + A_oligodendrocyte_reference) BIC = -83.15;(ENSMUSG00000002808 ~ A_neuron_reference) BIC = -82.48;(ENSMUSG00000002808 ~ A_endothelial_reference + A_neuron_reference) BIC = -81.83	3	TRUE	A_neuron_reference = 2.2729;A_oligodendrocyte_reference = 1.8929;A_endothelial_reference = 1.54	NA	0.0230301	0.0583666	NA	0.123561
Flii	flightless I homolog (Drosophila)	11	60527625	60540765	-1	B2	ENSMUSG00000002812	FALSE	(ENSMUSG00000002812 ~ A_endothelial_reference + A_oligodendrocyte_reference) BIC = -27.11;(ENSMUSG00000002812 ~ A_endothelial_reference + A_microglia_reference + A_oligodendrocyte_reference) BIC = -26.31;(ENSMUSG00000002812 ~ A_neuron_reference) BIC = -25.88;(ENSMUSG00000002812 ~ A_microglia_reference + A_neuron_reference) BIC = -25.55	4	TRUE	A_endothelial_reference = 2.3236;A_oligodendrocyte_reference = 3.6054;A_microglia_reference = 1.5258;A_neuron_reference = 3.2551	NA	0.00113337	0.00031168	0.127057	0.0201485
Top3a	topoisomerase (DNA) III alpha	11	60553560	60590867	-1	B2	ENSMUSG00000002814	FALSE	(ENSMUSG00000002814 ~ 1) BIC = -19.89;(ENSMUSG00000002814 ~ A_oligodendrocyte_reference) BIC = -18.77;(ENSMUSG00000002814 ~ A_endothelial_reference) BIC = -18.32;(ENSMUSG00000002814 ~ A_neuron_reference) BIC = -17.9	4	TRUE	A_oligodendrocyte_reference = 1.4226;A_endothelial_reference = 1.2703;A_neuron_reference = 1.1128	NA	0.265798	0.154853	NA	0.203991
Atg4d	autophagy-related 4D (yeast)	9	21069743	21078812	1	A3	ENSMUSG00000002820	FALSE	(ENSMUSG00000002820 ~ A_astrocyte_reference + A_endothelial_reference) BIC = -50.97;(ENSMUSG00000002820 ~ A_astrocyte_reference + A_endothelial_reference + A_neuron_reference) BIC = -50.42;(ENSMUSG00000002820 ~ A_astrocyte_reference + A_endothelial_reference + A_oligodendrocyte_reference) BIC = -49.41	3	TRUE	A_astrocyte_reference = 2.886;A_endothelial_reference = 3.6142;A_neuron_reference = 1.5353;A_oligodendrocyte_reference = 1.2228	0.00390219	0.124719	0.221396	NA	0.00030127
Qtrt1	queuine tRNA-ribosyltransferase 1	9	21216281	21224721	1	A3	ENSMUSG00000002825	FALSE	(ENSMUSG00000002825 ~ A_endothelial_reference + A_microglia_reference + A_neuron_reference) BIC = -40.08;(ENSMUSG00000002825 ~ A_endothelial_reference + A_microglia_reference) BIC = -39.33;(ENSMUSG00000002825 ~ A_endothelial_reference + A_microglia_reference + A_oligodendrocyte_reference) BIC = -38.74	3	TRUE	A_endothelial_reference = 2.4002;A_microglia_reference = 2.4435;A_neuron_reference = 1.8735;A_oligodendrocyte_reference = 1.5236	NA	0.061006	0.1276	0.0145443	0.0163881
Plin4	perilipin 4	17	56240014	56249225	-1	D	ENSMUSG00000002831	FALSE	(ENSMUSG00000002831 ~ A_endothelial_reference + A_oligodendrocyte_reference) BIC = 72.9;(ENSMUSG00000002831 ~ A_endothelial_reference) BIC = 73.36;(ENSMUSG00000002831 ~ A_endothelial_reference + A_neuron_reference) BIC = 73.66;(ENSMUSG00000002831 ~ A_endothelial_reference + A_microglia_reference + A_oligodendrocyte_reference) BIC = 74.21	4	TRUE	A_endothelial_reference = 2.4535;A_oligodendrocyte_reference = 1.8815;A_neuron_reference = 1.6368;A_microglia_reference = 1.3056	NA	0.101671	0.0598986	0.191701	0.0141476
Hdgfrp2	hepatoma-derived growth factor, related protein 2	17	56219057	56240019	1	D	ENSMUSG00000002833	FALSE	(ENSMUSG00000002833 ~ A_astrocyte_reference + A_endothelial_reference) BIC = -48.22;(ENSMUSG00000002833 ~ A_endothelial_reference + A_microglia_reference) BIC = -48.13;(ENSMUSG00000002833 ~ A_astrocyte_reference + A_endothelial_reference + A_microglia_reference) BIC = -48;(ENSMUSG00000002833 ~ A_microglia_reference) BIC = -46.96;(ENSMUSG00000002833 ~ A_astrocyte_reference + A_microglia_reference)…	5	TRUE	A_astrocyte_reference = 2.0039;A_endothelial_reference = 2.1288;A_microglia_reference = 2.2004	0.0450769	NA	NA	0.0277793	0.0332698
Chaf1a	chromatin assembly factor 1, subunit A (p150)	17	56179827	56206973	1	D	ENSMUSG00000002835	FALSE	(ENSMUSG00000002835 ~ A_astrocyte_reference) BIC = -8.37;(ENSMUSG00000002835 ~ A_astrocyte_reference + A_neuron_reference) BIC = -7.82;(ENSMUSG00000002835 ~ A_microglia_reference + A_neuron_reference) BIC = -7.55;(ENSMUSG00000002835 ~ A_neuron_reference) BIC = -6.77;(ENSMUSG00000002835 ~ A_astrocyte_reference + A_oligodendrocyte_reference) BIC = -6.69	5	TRUE	A_astrocyte_reference = 2.6407;A_neuron_reference = 2.0938;A_microglia_reference = 1.9208;A_oligodendrocyte_reference = 1.2044	0.00827233	0.0362739	0.228437	0.0547602	NA
Adprh	ADP-ribosylarginine hydrolase	16	38445479	38452769	-1	B4	ENSMUSG00000002844	FALSE	(ENSMUSG00000002844 ~ A_neuron_reference + A_oligodendrocyte_reference) BIC = -56.53;(ENSMUSG00000002844 ~ A_oligodendrocyte_reference) BIC = -55.23	2	TRUE	A_neuron_reference = 2.0445;A_oligodendrocyte_reference = 2.4986	NA	0.0408997	0.0124685	NA	NA
Tmem39a	transmembrane protein 39a	16	38558811	38592275	1	B4	ENSMUSG00000002845	FALSE	(ENSMUSG00000002845 ~ A_oligodendrocyte_reference) BIC = -50.65;(ENSMUSG00000002845 ~ A_endothelial_reference + A_oligodendrocyte_reference) BIC = -50.26;(ENSMUSG00000002845 ~ A_microglia_reference + A_oligodendrocyte_reference) BIC = -49.37	3	TRUE	A_oligodendrocyte_reference = 3.9108;A_endothelial_reference = 1.6115;A_microglia_reference = 1.3427	NA	NA	9.2e-05	0.179364	0.107068
4930455C21Rik	RIKEN cDNA 4930455C21 gene	16	38498429	38522747	-1	B4	ENSMUSG00000002846	FALSE	(ENSMUSG00000002846 ~ A_neuron_reference) BIC = -59.08;(ENSMUSG00000002846 ~ A_astrocyte_reference) BIC = -58.65	2	TRUE	A_neuron_reference = 2.6701;A_astrocyte_reference = 2.5802	0.00987532	0.00758238	NA	NA	NA
Pla1a	phospholipase A1 member A	16	38396205	38433225	-1	B4	ENSMUSG00000002847	FALSE	(ENSMUSG00000002847 ~ 1) BIC = -7.16;(ENSMUSG00000002847 ~ A_endothelial_reference) BIC = -5.9;(ENSMUSG00000002847 ~ A_astrocyte_reference + A_neuron_reference) BIC = -5.56	3	TRUE	A_endothelial_reference = 1.3778;A_astrocyte_reference = 1.8982;A_neuron_reference = 2.1017	0.0576692	0.0355813	NA	NA	0.168261
Mcm2	minichromosome maintenance deficient 2 mitotin (S. cerevisiae)	6	88833469	88848774	-1	D1	ENSMUSG00000002870	FALSE	(ENSMUSG00000002870 ~ 1) BIC = -22.21	1	FALSE	NA	NA	NA	NA	NA	NA
Tpra1	transmembrane protein, adipocyte asscociated 1	6	88852245	88862232	1	D1	ENSMUSG00000002871	FALSE	(ENSMUSG00000002871 ~ A_endothelial_reference + A_microglia_reference + A_neuron_reference) BIC = -40.58	1	FALSE	NA	NA	0.00015759	NA	0.450092	0.00227346
Nab1	Ngfi-A binding protein 1	1	52514138	52557523	-1	C1.1	ENSMUSG00000002881	FALSE	(ENSMUSG00000002881 ~ A_oligodendrocyte_reference) BIC = -55.24;(ENSMUSG00000002881 ~ A_neuron_reference + A_oligodendrocyte_reference) BIC = -53.75;(ENSMUSG00000002881 ~ A_endothelial_reference + A_oligodendrocyte_reference) BIC = -53.63	3	TRUE	A_oligodendrocyte_reference = 3.3903;A_neuron_reference = 1.2716;A_endothelial_reference = 1.2284	NA	0.203525	0.00069804	NA	0.21931
Cd97	CD97 antigen	8	86247150	86265225	-1	C2	ENSMUSG00000002885	FALSE	(ENSMUSG00000002885 ~ A_endothelial_reference + A_oligodendrocyte_reference) BIC = 9.16;(ENSMUSG00000002885 ~ A_endothelial_reference + A_microglia_reference + A_oligodendrocyte_reference) BIC = 9.63;(ENSMUSG00000002885 ~ A_endothelial_reference + A_neuron_reference) BIC = 9.88;(ENSMUSG00000002885 ~ A_endothelial_reference) BIC = 9.91;(ENSMUSG00000002885 ~ A_endothelial_reference + A_microglia_re…	5	TRUE	A_endothelial_reference = 3.6144;A_oligodendrocyte_reference = 2.0016;A_microglia_reference = 1.5179;A_neuron_reference = 1.8082	NA	0.0705735	0.0453263	0.129041	0.00030105
Il17ra	interleukin 17 receptor A	6	120413215	120433745	1	F1	ENSMUSG00000002897	FALSE	(ENSMUSG00000002897 ~ 1) BIC = -17.44;(ENSMUSG00000002897 ~ A_neuron_reference) BIC = -16.66;(ENSMUSG00000002897 ~ A_microglia_reference + A_neuron_reference) BIC = -16.24	3	TRUE	A_neuron_reference = 1.6816;A_microglia_reference = 1.6041	NA	0.0926371	NA	0.1087	NA
Lamb1	laminin B1	12	31950099	32014509	1	A2	ENSMUSG00000002900	FALSE	(ENSMUSG00000002900 ~ A_neuron_reference) BIC = -21.28;(ENSMUSG00000002900 ~ A_microglia_reference + A_neuron_reference) BIC = -20.54	2	TRUE	A_neuron_reference = 4.9278;A_microglia_reference = 1.5106	NA	8.3e-07	NA	0.1309	NA
Kcnn1	potassium intermediate/small conductance calcium-activated channel, subfamily N, member 1	8	73365948	73380907	-1	B3.3	ENSMUSG00000002908	FALSE	(ENSMUSG00000002908 ~ A_neuron_reference + A_oligodendrocyte_reference) BIC = -35.77;(ENSMUSG00000002908 ~ A_microglia_reference + A_neuron_reference + A_oligodendrocyte_reference) BIC = -34.08;(ENSMUSG00000002908 ~ A_astrocyte_reference + A_oligodendrocyte_reference) BIC = -33.83	3	TRUE	A_neuron_reference = 2.1916;A_oligodendrocyte_reference = 2.7236;A_microglia_reference = 1.1778;A_astrocyte_reference = 1.8074	0.0706974	0.0284052	0.00645747	0.238896	NA
Arrdc2	arrestin domain containing 2	8	73359054	73363619	-1	B3.3	ENSMUSG00000002910	FALSE	(ENSMUSG00000002910 ~ A_oligodendrocyte_reference) BIC = 23.86	1	FALSE	NA	NA	NA	0.00313024	NA	NA
Ppp1r17	protein phosphatase 1, regulatory subunit 17	6	55967509	55982682	1	B3	ENSMUSG00000002930	FALSE	(ENSMUSG00000002930 ~ A_neuron_reference) BIC = 75.21;(ENSMUSG00000002930 ~ A_oligodendrocyte_reference) BIC = 75.92;(ENSMUSG00000002930 ~ A_astrocyte_reference) BIC = 76.5;(ENSMUSG00000002930 ~ A_endothelial_reference + A_oligodendrocyte_reference) BIC = 77.06	4	TRUE	A_neuron_reference = 2.6828;A_oligodendrocyte_reference = 2.6133;A_astrocyte_reference = 2.4112;A_endothelial_reference = 1.3872	0.0158984	0.00730019	0.00896727	NA	0.165392
Cd36	CD36 antigen	5	17287508	17394777	-1	A3	ENSMUSG00000002944	FALSE	(ENSMUSG00000002944 ~ A_astrocyte_reference + A_endothelial_reference + A_oligodendrocyte_reference) BIC = 39.35;(ENSMUSG00000002944 ~ A_endothelial_reference + A_neuron_reference + A_oligodendrocyte_reference) BIC = 39.38;(ENSMUSG00000002944 ~ A_endothelial_reference + A_neuron_reference) BIC = 39.58;(ENSMUSG00000002944 ~ A_neuron_reference) BIC = 39.59;(ENSMUSG00000002944 ~ A_endothelial_refere…	6	TRUE	A_astrocyte_reference = 1.6626;A_endothelial_reference = 2.2101;A_oligodendrocyte_reference = 2.1356;A_neuron_reference = 2.3159	0.0963944	0.0205647	0.0327088	NA	0.0270973
Map2k7	mitogen-activated protein kinase kinase 7	8	4238740	4251423	1	A1.1	ENSMUSG00000002948	FALSE	(ENSMUSG00000002948 ~ A_endothelial_reference + A_microglia_reference + A_neuron_reference) BIC = -74.04	1	FALSE	NA	NA	0.000131463	NA	0.938419	0.00359606
Timm44	translocase of inner mitochondrial membrane 44	8	4259731	4275913	-1	A1.1	ENSMUSG00000002949	FALSE	(ENSMUSG00000002949 ~ A_endothelial_reference + A_microglia_reference + A_neuron_reference) BIC = -57.43;(ENSMUSG00000002949 ~ A_endothelial_reference + A_microglia_reference + A_oligodendrocyte_reference) BIC = -56.03;(ENSMUSG00000002949 ~ A_astrocyte_reference + A_endothelial_reference + A_microglia_reference + A_neuron_reference) BIC = -56.01	3	TRUE	A_endothelial_reference = 2.7699;A_microglia_reference = 3.4297;A_neuron_reference = 2.2802;A_oligodendrocyte_reference = 2.1051;A_astrocyte_reference = 1.2436	0.213664	0.022598	0.035281	0.00060428	0.00560695
Ap2a2	adaptor protein complex AP-2, alpha 2 subunit	7	148748079	148818910	1	F5	ENSMUSG00000002957	FALSE	(ENSMUSG00000002957 ~ A_neuron_reference) BIC = -54.06;(ENSMUSG00000002957 ~ A_neuron_reference + A_oligodendrocyte_reference) BIC = -52.57	2	TRUE	A_neuron_reference = 4.5112;A_oligodendrocyte_reference = 1.2729	NA	6.45e-06	0.203042	NA	NA
Pnkp	polynucleotide kinase 3'- phosphatase	7	52112509	52118295	1	B4	ENSMUSG00000002963	FALSE	(ENSMUSG00000002963 ~ A_astrocyte_reference + A_endothelial_reference) BIC = -40.55	1	FALSE	NA	3.97318e-05	NA	NA	NA	0.000296786
Med25	mediator of RNA polymerase II transcription, subunit 25 homolog (yeast)	7	52134761	52147779	-1	B4	ENSMUSG00000002968	FALSE	(ENSMUSG00000002968 ~ A_endothelial_reference + A_oligodendrocyte_reference) BIC = -58.08	1	FALSE	NA	NA	NA	2.4276e-05	NA	0.000103282
Bcam	basal cell adhesion molecule	7	20341480	20356365	-1	A3	ENSMUSG00000002980	FALSE	(ENSMUSG00000002980 ~ A_endothelial_reference + A_neuron_reference) BIC = -1.32	1	FALSE	NA	NA	0.000188164	NA	NA	0.000727723
Clptm1	cleft lip and palate associated transmembrane protein 1	7	20216930	20250379	-1	A3	ENSMUSG00000002981	FALSE	(ENSMUSG00000002981 ~ A_neuron_reference) BIC = -64.94;(ENSMUSG00000002981 ~ A_endothelial_reference + A_neuron_reference) BIC = -64.94;(ENSMUSG00000002981 ~ A_neuron_reference + A_oligodendrocyte_reference) BIC = -64.73;(ENSMUSG00000002981 ~ A_microglia_reference + A_neuron_reference) BIC = -63.41;(ENSMUSG00000002981 ~ 1) BIC = -63.12;(ENSMUSG00000002981 ~ A_endothelial_reference + A_neuron_refe…	6	TRUE	A_neuron_reference = 1.9553;A_endothelial_reference = 1.5245;A_oligodendrocyte_reference = 1.4452;A_microglia_reference = 1.2586	NA	0.0505514	0.148414	0.208172	0.12738
Relb	avian reticuloendotheliosis viral (v-rel) oncogene related B	7	20191566	20214787	-1	A3	ENSMUSG00000002983	FALSE	(ENSMUSG00000002983 ~ A_oligodendrocyte_reference) BIC = -14.66;(ENSMUSG00000002983 ~ A_astrocyte_reference + A_oligodendrocyte_reference) BIC = -13.64;(ENSMUSG00000002983 ~ A_neuron_reference) BIC = -12.97;(ENSMUSG00000002983 ~ A_neuron_reference + A_oligodendrocyte_reference) BIC = -12.94	4	TRUE	A_oligodendrocyte_reference = 2.5363;A_astrocyte_reference = 1.4262;A_neuron_reference = 1.7288	0.153811	0.0838452	0.011202	NA	NA
Tomm40	translocase of outer mitochondrial membrane 40 homolog (yeast)	7	20286662	20300787	-1	A3	ENSMUSG00000002984	FALSE	(ENSMUSG00000002984 ~ A_neuron_reference + A_oligodendrocyte_reference) BIC = -53.27	1	FALSE	NA	NA	0.968598	0.00169794	NA	NA
Apoe	apolipoprotein E	7	20281458	20284515	-1	A3	ENSMUSG00000002985	FALSE	(ENSMUSG00000002985 ~ A_endothelial_reference + A_microglia_reference) BIC = -52.97;(ENSMUSG00000002985 ~ A_endothelial_reference + A_microglia_reference + A_neuron_reference) BIC = -51.03	2	TRUE	A_endothelial_reference = 2.9709;A_microglia_reference = 2.8939;A_neuron_reference = 1.0876	NA	0.276774	NA	0.00380499	0.00296913
Hbp1	high mobility group box transcription factor 1	12	32611119	32635400	-1	A3	ENSMUSG00000002996	FALSE	(ENSMUSG00000002996 ~ A_neuron_reference) BIC = -54.12	1	FALSE	NA	NA	6.15752e-05	NA	NA	NA
Prkar2b	protein kinase, cAMP dependent regulatory, type II beta	12	32643341	32746161	-1	A3	ENSMUSG00000002997	FALSE	(ENSMUSG00000002997 ~ A_astrocyte_reference + A_neuron_reference) BIC = -17.09;(ENSMUSG00000002997 ~ A_neuron_reference) BIC = -17.08;(ENSMUSG00000002997 ~ A_microglia_reference + A_neuron_reference) BIC = -15.49	3	TRUE	A_astrocyte_reference = 1.7246;A_neuron_reference = 2.9242;A_microglia_reference = 1.2411	0.0845908	0.00345365	NA	0.214576	NA
Cdkn1b	cyclin-dependent kinase inhibitor 1B	6	134870419	134875531	1	G1	ENSMUSG00000003031	FALSE	(ENSMUSG00000003031 ~ A_microglia_reference) BIC = -64.39;(ENSMUSG00000003031 ~ A_microglia_reference + A_oligodendrocyte_reference) BIC = -63.81;(ENSMUSG00000003031 ~ A_astrocyte_reference) BIC = -63.53;(ENSMUSG00000003031 ~ A_oligodendrocyte_reference) BIC = -63.37;(ENSMUSG00000003031 ~ A_microglia_reference + A_neuron_reference) BIC = -62.88;(ENSMUSG00000003031 ~ A_astrocyte_reference + A_micr…	7	TRUE	A_microglia_reference = 2.056;A_oligodendrocyte_reference = 1.7472;A_astrocyte_reference = 1.7009;A_neuron_reference = 1.2636	0.0889565	0.20638	0.0805966	0.0397828	NA
Klf4	Kruppel-like factor 4 (gut)	4	55540013	55545347	-1	B3	ENSMUSG00000003032	FALSE	(ENSMUSG00000003032 ~ A_astrocyte_reference + A_endothelial_reference) BIC = 1.04;(ENSMUSG00000003032 ~ A_endothelial_reference + A_microglia_reference) BIC = 1.85;(ENSMUSG00000003032 ~ A_astrocyte_reference + A_endothelial_reference + A_microglia_reference) BIC = 2.17	3	TRUE	A_astrocyte_reference = 2.3005;A_endothelial_reference = 5.4502;A_microglia_reference = 1.8995	0.0214183	NA	NA	0.0575046	5e-08
Ap1m1	adaptor-related protein complex AP-1, mu subunit 1	8	74763917	74781284	1	B3.3	ENSMUSG00000003033	FALSE	(ENSMUSG00000003033 ~ A_endothelial_reference + A_microglia_reference) BIC = -68.42;(ENSMUSG00000003033 ~ A_microglia_reference) BIC = -68.05;(ENSMUSG00000003033 ~ A_microglia_reference + A_neuron_reference) BIC = -67.85;(ENSMUSG00000003033 ~ A_endothelial_reference + A_microglia_reference + A_neuron_reference) BIC = -67.49;(ENSMUSG00000003033 ~ A_endothelial_reference + A_microglia_reference + A…	5	TRUE	A_endothelial_reference = 1.7652;A_microglia_reference = 3.0653;A_neuron_reference = 1.5424;A_oligodendrocyte_reference = 1.2319	NA	0.122971	0.217998	0.00217478	0.0775262
Rab8a	RAB8A, member RAS oncogene family	8	74685099	74707803	1	B3.3	ENSMUSG00000003037	FALSE	(ENSMUSG00000003037 ~ 1) BIC = -82.63;(ENSMUSG00000003037 ~ A_microglia_reference + A_oligodendrocyte_reference) BIC = -81.68;(ENSMUSG00000003037 ~ A_oligodendrocyte_reference) BIC = -80.72	3	TRUE	A_microglia_reference = 1.9633;A_oligodendrocyte_reference = 1.5333	NA	NA	0.125191	0.0496135	NA
Hmgn2	high mobility group nucleosomal binding domain 2	4	133520653	133524565	-1	D3	ENSMUSG00000003038	FALSE	(ENSMUSG00000003038 ~ A_endothelial_reference + A_neuron_reference) BIC = -46.98;(ENSMUSG00000003038 ~ A_endothelial_reference + A_neuron_reference + A_oligodendrocyte_reference) BIC = -46.51;(ENSMUSG00000003038 ~ A_astrocyte_reference + A_endothelial_reference + A_neuron_reference) BIC = -46.23;(ENSMUSG00000003038 ~ A_astrocyte_reference + A_endothelial_reference + A_neuron_reference + A_oligode…	5	TRUE	A_endothelial_reference = 2.6747;A_neuron_reference = 1.9332;A_oligodendrocyte_reference = 1.5587;A_astrocyte_reference = 1.4831;A_microglia_reference = 1.0764	0.138037	0.0532092	0.119063	0.281759	0.00748055
Fam32a	family with sequence similarity 32, member A	8	74743629	74747663	1	B3.3	ENSMUSG00000003039	FALSE	(ENSMUSG00000003039 ~ 1) BIC = -66.92	1	FALSE	NA	NA	NA	NA	NA	NA
Stard3nl	STARD3 N-terminal like	13	19449546	19487621	-1	A2	ENSMUSG00000003062	FALSE	(ENSMUSG00000003062 ~ A_oligodendrocyte_reference) BIC = -69.64	1	FALSE	NA	NA	NA	0.00141643	NA	NA
Stk11	serine/threonine kinase 11	10	79578548	79593427	1	C1	ENSMUSG00000003068	FALSE	(ENSMUSG00000003068 ~ A_endothelial_reference + A_microglia_reference + A_neuron_reference + A_oligodendrocyte_reference) BIC = -66.84;(ENSMUSG00000003068 ~ A_astrocyte_reference + A_endothelial_reference) BIC = -65.54	2	TRUE	A_endothelial_reference = 2.5461;A_microglia_reference = 2.427;A_neuron_reference = 2.975;A_oligodendrocyte_reference = 2.2338;A_astrocyte_reference = 3.5487	0.000387141	0.00293031	0.0254954	0.0152227	0.0108923
Efna2	ephrin A2	10	79642227	79652755	1	C1	ENSMUSG00000003070	FALSE	(ENSMUSG00000003070 ~ A_microglia_reference + A_oligodendrocyte_reference) BIC = -34.83;(ENSMUSG00000003070 ~ A_oligodendrocyte_reference) BIC = -33.31	2	TRUE	A_microglia_reference = 2.0958;A_oligodendrocyte_reference = 2.7153	NA	NA	0.00662085	0.0360959	NA
Atp5d	ATP synthase, H+ transporting, mitochondrial F1 complex, delta subunit	10	79601377	79608563	1	C1	ENSMUSG00000003072	FALSE	(ENSMUSG00000003072 ~ A_endothelial_reference + A_neuron_reference + A_oligodendrocyte_reference) BIC = -43.27;(ENSMUSG00000003072 ~ A_neuron_reference + A_oligodendrocyte_reference) BIC = -42.64;(ENSMUSG00000003072 ~ A_endothelial_reference + A_oligodendrocyte_reference) BIC = -41.83	3	TRUE	A_endothelial_reference = 1.9662;A_neuron_reference = 2.2034;A_oligodendrocyte_reference = 2.3801	NA	0.0275644	0.017306	NA	0.0492747
Ppp5c	protein phosphatase 5, catalytic subunit	7	17589989	17613273	-1	A2	ENSMUSG00000003099	FALSE	(ENSMUSG00000003099 ~ A_oligodendrocyte_reference) BIC = -68.72;(ENSMUSG00000003099 ~ A_microglia_reference + A_oligodendrocyte_reference) BIC = -67.17;(ENSMUSG00000003099 ~ A_astrocyte_reference + A_oligodendrocyte_reference) BIC = -66.81	3	TRUE	A_oligodendrocyte_reference = 4.2206;A_microglia_reference = 1.2537;A_astrocyte_reference = 1.1208	0.262393	NA	2.437e-05	0.209936	NA
Cdk12	cyclin-dependent kinase 12	11	98064373	98139818	1	D	ENSMUSG00000003119	FALSE	(ENSMUSG00000003119 ~ A_endothelial_reference + A_neuron_reference + A_oligodendrocyte_reference) BIC = -35.6;(ENSMUSG00000003119 ~ A_endothelial_reference) BIC = -34.53	2	TRUE	A_endothelial_reference = 2.4497;A_neuron_reference = 2.5809;A_oligodendrocyte_reference = 2.4589	NA	0.009855	0.0139365	NA	0.0142964
Lipe	lipase, hormone sensitive	7	26164546	26183729	-1	A3	ENSMUSG00000003123	FALSE	(ENSMUSG00000003123 ~ A_microglia_reference + A_neuron_reference) BIC = -34.92;(ENSMUSG00000003123 ~ A_neuron_reference) BIC = -33.81;(ENSMUSG00000003123 ~ A_endothelial_reference + A_neuron_reference) BIC = -33.11	3	TRUE	A_microglia_reference = 1.9999;A_neuron_reference = 3.5149;A_endothelial_reference = 1.5242	NA	0.00043998	NA	0.0455115	0.127466
Pafah1b2	platelet-activating factor acetylhydrolase, isoform 1b, subunit 2	9	45773394	45792954	-1	A5.2	ENSMUSG00000003131	FALSE	(ENSMUSG00000003131 ~ A_oligodendrocyte_reference) BIC = -97.6;(ENSMUSG00000003131 ~ A_neuron_reference + A_oligodendrocyte_reference) BIC = -96.37;(ENSMUSG00000003131 ~ A_astrocyte_reference + A_oligodendrocyte_reference) BIC = -96.34;(ENSMUSG00000003131 ~ A_microglia_reference + A_oligodendrocyte_reference) BIC = -95.94;(ENSMUSG00000003131 ~ A_neuron_reference) BIC = -95.67	5	TRUE	A_oligodendrocyte_reference = 2.7885;A_neuron_reference = 1.7289;A_astrocyte_reference = 1.352;A_microglia_reference = 1.2146	0.17636	0.0838252	0.00529479	0.224531	NA
Tbc1d8	TBC1 domain family, member 8	1	39428344	39535592	-1	B	ENSMUSG00000003134	FALSE	(ENSMUSG00000003134 ~ A_neuron_reference) BIC = 4.17;(ENSMUSG00000003134 ~ A_endothelial_reference + A_neuron_reference) BIC = 4.35	2	TRUE	A_neuron_reference = 6.9285;A_endothelial_reference = 1.6708	NA	0	NA	NA	0.0947523
D1Bwg0212e	DNA segment, Chr 1, Brigham & Women's Genetics 0212 expressed	1	39591837	39603726	1	B	ENSMUSG00000003135	FALSE	(ENSMUSG00000003135 ~ 1) BIC = -89;(ENSMUSG00000003135 ~ A_microglia_reference + A_oligodendrocyte_reference) BIC = -87.96;(ENSMUSG00000003135 ~ A_microglia_reference + A_neuron_reference + A_oligodendrocyte_reference) BIC = -87.55;(ENSMUSG00000003135 ~ A_microglia_reference) BIC = -87.47	4	TRUE	A_microglia_reference = 1.667;A_oligodendrocyte_reference = 1.8307;A_neuron_reference = 1.574	NA	0.115499	0.0671514	0.0955199	NA
Slc2a3	solute carrier family 2 (facilitated glucose transporter), member 3	6	122677827	122751658	-1	F2	ENSMUSG00000003153	FALSE	(ENSMUSG00000003153 ~ A_neuron_reference) BIC = -69.56	1	FALSE	NA	NA	3.64985e-10	NA	NA	NA
Foxj2	forkhead box J2	6	122769932	122795384	1	F2	ENSMUSG00000003154	FALSE	(ENSMUSG00000003154 ~ A_microglia_reference) BIC = -80.83;(ENSMUSG00000003154 ~ A_microglia_reference + A_oligodendrocyte_reference) BIC = -80.59	2	TRUE	A_microglia_reference = 3.2352;A_oligodendrocyte_reference = 1.655	NA	NA	0.0979331	0.00121554	NA
Sri	sorcin	5	8046078	8069379	1	A1	ENSMUSG00000003161	FALSE	(ENSMUSG00000003161 ~ A_microglia_reference + A_neuron_reference) BIC = -79.68;(ENSMUSG00000003161 ~ A_microglia_reference + A_oligodendrocyte_reference) BIC = -78.8;(ENSMUSG00000003161 ~ A_astrocyte_reference + A_microglia_reference + A_oligodendrocyte_reference) BIC = -78.76;(ENSMUSG00000003161 ~ A_endothelial_reference + A_microglia_reference + A_neuron_reference) BIC = -78.25;(ENSMUSG00000003…	5	TRUE	A_microglia_reference = 3.0697;A_neuron_reference = 2.411;A_oligodendrocyte_reference = 1.871;A_astrocyte_reference = 1.6755;A_endothelial_reference = 1.2668	0.093833	0.0159068	0.0613496	0.00214254	0.205225
Dgcr2	DiGeorge syndrome critical region gene 2	16	17839575	17894238	-1	A3	ENSMUSG00000003166	FALSE	(ENSMUSG00000003166 ~ A_oligodendrocyte_reference) BIC = -62.94;(ENSMUSG00000003166 ~ A_microglia_reference) BIC = -62.81;(ENSMUSG00000003166 ~ 1) BIC = -62.27;(ENSMUSG00000003166 ~ A_neuron_reference) BIC = -61.36;(ENSMUSG00000003166 ~ A_astrocyte_reference) BIC = -61.15	5	TRUE	A_oligodendrocyte_reference = 1.9307;A_microglia_reference = 1.8976;A_neuron_reference = 1.4925;A_astrocyte_reference = 1.4245	0.154295	0.135556	0.053517	0.0577481	NA
Mical3	microtubule associated monoxygenase, calponin and LIM domain containing 3	6	120951381	121031627	-1	F1	ENSMUSG00000003178	FALSE	(ENSMUSG00000003178 ~ A_endothelial_reference) BIC = 10.22;(ENSMUSG00000003178 ~ A_endothelial_reference + A_oligodendrocyte_reference) BIC = 11.15;(ENSMUSG00000003178 ~ A_endothelial_reference + A_neuron_reference + A_oligodendrocyte_reference) BIC = 12.17	3	TRUE	A_endothelial_reference = 2.382;A_oligodendrocyte_reference = 1.3781;A_neuron_reference = 1.3969	NA	0.162447	0.168161	NA	0.0172186
Irf3	interferon regulatory factor 3	7	52253018	52258218	1	B4	ENSMUSG00000003184	FALSE	(ENSMUSG00000003184 ~ A_endothelial_reference + A_neuron_reference) BIC = -26.21;(ENSMUSG00000003184 ~ A_endothelial_reference) BIC = -24.75	2	TRUE	A_endothelial_reference = 2.9864;A_neuron_reference = 2.0814	NA	0.0373934	NA	NA	0.00282308
Bcl2l12	BCL2-like 12 (proline rich)	7	52246592	52254082	-1	B4	ENSMUSG00000003190	FALSE	(ENSMUSG00000003190 ~ 1) BIC = 11.56;(ENSMUSG00000003190 ~ A_endothelial_reference) BIC = 13.07;(ENSMUSG00000003190 ~ A_astrocyte_reference) BIC = 13.44	3	TRUE	A_endothelial_reference = 1.2919;A_astrocyte_reference = 1.1569	0.247328	NA	NA	NA	0.196404
Zfp959	zinc finger protein 959	17	56031607	56038007	1	D	ENSMUSG00000003198	FALSE	(ENSMUSG00000003198 ~ A_astrocyte_reference) BIC = -21.6;(ENSMUSG00000003198 ~ 1) BIC = -21.33;(ENSMUSG00000003198 ~ A_neuron_reference) BIC = -20.95;(ENSMUSG00000003198 ~ A_oligodendrocyte_reference) BIC = -20.34;(ENSMUSG00000003198 ~ A_astrocyte_reference + A_microglia_reference) BIC = -19.62	5	TRUE	A_astrocyte_reference = 1.74;A_neuron_reference = 1.65;A_oligodendrocyte_reference = 1.4648;A_microglia_reference = 1.0925	0.0818515	0.0989529	0.142985	0.274614	NA
Mpnd	MPN domain containing	17	56145134	56156213	1	D	ENSMUSG00000003199	FALSE	(ENSMUSG00000003199 ~ A_endothelial_reference + A_neuron_reference + A_oligodendrocyte_reference) BIC = -47;(ENSMUSG00000003199 ~ A_endothelial_reference + A_neuron_reference) BIC = -46.64;(ENSMUSG00000003199 ~ A_neuron_reference + A_oligodendrocyte_reference) BIC = -45.05	3	TRUE	A_endothelial_reference = 2.3695;A_neuron_reference = 2.7102;A_oligodendrocyte_reference = 1.8887	NA	0.00672373	0.0589343	NA	0.0178105
Sh3gl1	SH3-domain GRB2-like 1	17	56156176	56176058	-1	D	ENSMUSG00000003200	FALSE	(ENSMUSG00000003200 ~ A_oligodendrocyte_reference) BIC = -76.19;(ENSMUSG00000003200 ~ A_endothelial_reference + A_oligodendrocyte_reference) BIC = -75.65	2	TRUE	A_oligodendrocyte_reference = 5.7855;A_endothelial_reference = 1.5705	NA	NA	1e-08	NA	0.11631
Ccdc94	coiled-coil domain containing 94	17	56098610	56107372	1	D	ENSMUSG00000003208	FALSE	(ENSMUSG00000003208 ~ 1) BIC = -37.06;(ENSMUSG00000003208 ~ A_astrocyte_reference) BIC = -36.16;(ENSMUSG00000003208 ~ A_neuron_reference) BIC = -36.06	3	TRUE	A_astrocyte_reference = 1.493;A_neuron_reference = 1.4601	0.135444	0.144252	NA	NA	NA
Ranbp2	RAN binding protein 2	10	57909600	57956903	1	B4	ENSMUSG00000003226	FALSE	(ENSMUSG00000003226 ~ A_endothelial_reference) BIC = -27.4;(ENSMUSG00000003226 ~ A_endothelial_reference + A_microglia_reference) BIC = -27.19;(ENSMUSG00000003226 ~ A_microglia_reference + A_neuron_reference + A_oligodendrocyte_reference) BIC = -26.83;(ENSMUSG00000003226 ~ A_microglia_reference) BIC = -26.75;(ENSMUSG00000003226 ~ A_neuron_reference + A_oligodendrocyte_reference) BIC = -25.95;(ENS…	7	TRUE	A_endothelial_reference = 1.9776;A_microglia_reference = 1.8139;A_neuron_reference = 2.2166;A_oligodendrocyte_reference = 1.6465	NA	0.02665	0.0996583	0.0697006	0.047974
Grk5	G protein-coupled receptor kinase 5	19	60965652	61168456	1	D3	ENSMUSG00000003228	FALSE	(ENSMUSG00000003228 ~ A_endothelial_reference + A_microglia_reference) BIC = -27.26;(ENSMUSG00000003228 ~ A_astrocyte_reference + A_endothelial_reference) BIC = -26.17;(ENSMUSG00000003228 ~ A_endothelial_reference) BIC = -25.87;(ENSMUSG00000003228 ~ A_microglia_reference) BIC = -25.83	4	TRUE	A_endothelial_reference = 2.1855;A_microglia_reference = 2.1462;A_astrocyte_reference = 1.7991	0.0720106	NA	NA	0.0318589	0.0288523
Dvl3	dishevelled 3, dsh homolog (Drosophila)	16	20517055	20532593	1	A3	ENSMUSG00000003233	FALSE	(ENSMUSG00000003233 ~ 1) BIC = -38.62;(ENSMUSG00000003233 ~ A_microglia_reference + A_neuron_reference + A_oligodendrocyte_reference) BIC = -38.2;(ENSMUSG00000003233 ~ A_neuron_reference + A_oligodendrocyte_reference) BIC = -38.2;(ENSMUSG00000003233 ~ A_astrocyte_reference + A_microglia_reference + A_neuron_reference + A_oligodendrocyte_reference) BIC = -36.94;(ENSMUSG00000003233 ~ A_microglia_re…	6	TRUE	A_microglia_reference = 1.5822;A_neuron_reference = 2.1581;A_oligodendrocyte_reference = 2.1677;A_astrocyte_reference = 1.2946	0.195461	0.0309217	0.0301836	0.113596	NA
Abcf3	ATP-binding cassette, sub-family F (GCN20), member 3	16	20548650	20561452	1	A3	ENSMUSG00000003234	FALSE	(ENSMUSG00000003234 ~ A_endothelial_reference) BIC = -70.47;(ENSMUSG00000003234 ~ 1) BIC = -69.44	2	TRUE	A_endothelial_reference = 2.0206	NA	NA	NA	NA	0.0433191
Eif2b5	eukaryotic translation initiation factor 2B, subunit 5 epsilon	16	20498890	20510028	1	A3	ENSMUSG00000003235	FALSE	(ENSMUSG00000003235 ~ 1) BIC = -71.73;(ENSMUSG00000003235 ~ A_endothelial_reference) BIC = -70.19	2	TRUE	A_endothelial_reference = 1.2804	NA	NA	NA	NA	0.20042
Cyth2	cytohesin 2	7	53062007	53069951	-1	B4	ENSMUSG00000003269	FALSE	(ENSMUSG00000003269 ~ A_endothelial_reference + A_oligodendrocyte_reference) BIC = -71.56;(ENSMUSG00000003269 ~ A_oligodendrocyte_reference) BIC = -70.14	2	TRUE	A_endothelial_reference = 2.0732;A_oligodendrocyte_reference = 7.5544	NA	NA	0	NA	0.0381563
Sult2b1	sulfotransferase family, cytosolic, 2B, member 1	7	52985353	53014982	-1	B4	ENSMUSG00000003271	FALSE	(ENSMUSG00000003271 ~ A_neuron_reference + A_oligodendrocyte_reference) BIC = 3.12;(ENSMUSG00000003271 ~ A_astrocyte_reference + A_neuron_reference + A_oligodendrocyte_reference) BIC = 4.95;(ENSMUSG00000003271 ~ A_neuron_reference) BIC = 5.07	3	TRUE	A_neuron_reference = 2.4134;A_oligodendrocyte_reference = 2.1479;A_astrocyte_reference = 1.1274	0.259558	0.0158065	0.0317178	NA	NA
Car11	carbonic anhydrase 11	7	52955213	52960052	1	B4	ENSMUSG00000003273	FALSE	(ENSMUSG00000003273 ~ A_endothelial_reference + A_neuron_reference) BIC = -25.43	1	FALSE	NA	NA	0.000361976	NA	NA	6.03088e-05
Dlgap1	discs, large (Drosophila) homolog-associated protein 1	17	70318413	71170753	1	E1.3	ENSMUSG00000003279	FALSE	(ENSMUSG00000003279 ~ A_astrocyte_reference + A_endothelial_reference + A_neuron_reference) BIC = -31.15;(ENSMUSG00000003279 ~ A_astrocyte_reference + A_endothelial_reference + A_microglia_reference + A_neuron_reference) BIC = -29.21	2	TRUE	A_astrocyte_reference = 2.1604;A_endothelial_reference = 2.3119;A_neuron_reference = 4.2212;A_microglia_reference = 1.0635	0.0307432	2.43e-05	NA	0.287573	0.0207848
Plag1	pleiomorphic adenoma gene 1	4	3828143	3865570	-1	A1	ENSMUSG00000003282	FALSE	(ENSMUSG00000003282 ~ A_oligodendrocyte_reference) BIC = 1.25;(ENSMUSG00000003282 ~ A_astrocyte_reference + A_oligodendrocyte_reference) BIC = 1.62;(ENSMUSG00000003282 ~ A_microglia_reference + A_oligodendrocyte_reference) BIC = 2.08;(ENSMUSG00000003282 ~ 1) BIC = 2.45;(ENSMUSG00000003282 ~ A_neuron_reference + A_oligodendrocyte_reference) BIC = 3.01	5	TRUE	A_oligodendrocyte_reference = 2.125;A_astrocyte_reference = 1.6194;A_microglia_reference = 1.4873;A_neuron_reference = 1.1799	0.105365	0.238053	0.0335891	0.136926	NA
Hck	hemopoietic cell kinase	2	152934204	152977177	1	H1	ENSMUSG00000003283	FALSE	(ENSMUSG00000003283 ~ 1) BIC = 6.82;(ENSMUSG00000003283 ~ A_astrocyte_reference) BIC = 7.35;(ENSMUSG00000003283 ~ A_endothelial_reference) BIC = 7.78;(ENSMUSG00000003283 ~ A_neuron_reference) BIC = 8.36;(ENSMUSG00000003283 ~ A_oligodendrocyte_reference) BIC = 8.47	5	TRUE	A_astrocyte_reference = 1.6044;A_endothelial_reference = 1.4734;A_neuron_reference = 1.2796;A_oligodendrocyte_reference = 1.2422	0.108635	0.200684	0.214149	NA	0.14065
Mrpl4	mitochondrial ribosomal protein L4	9	20807181	20813279	1	A3	ENSMUSG00000003299	FALSE	(ENSMUSG00000003299 ~ A_endothelial_reference) BIC = -45.51;(ENSMUSG00000003299 ~ A_endothelial_reference + A_neuron_reference + A_oligodendrocyte_reference) BIC = -45.14;(ENSMUSG00000003299 ~ A_neuron_reference + A_oligodendrocyte_reference) BIC = -44.23	3	TRUE	A_endothelial_reference = 2.2107;A_neuron_reference = 2.4534;A_oligodendrocyte_reference = 2.3443	NA	0.0141527	0.0190647	NA	0.0270588
Keap1	kelch-like ECH-associated protein 1	9	21034174	21043776	-1	A3	ENSMUSG00000003308	FALSE	(ENSMUSG00000003308 ~ A_neuron_reference + A_oligodendrocyte_reference) BIC = -90.33;(ENSMUSG00000003308 ~ A_endothelial_reference + A_neuron_reference + A_oligodendrocyte_reference) BIC = -89.94;(ENSMUSG00000003308 ~ A_endothelial_reference) BIC = -89.03	3	TRUE	A_neuron_reference = 2.3899;A_oligodendrocyte_reference = 2.9207;A_endothelial_reference = 1.7675	NA	0.0168534	0.00349282	NA	0.0771416
Glg1	golgi apparatus protein 1	8	113678321	113783116	-1	E1	ENSMUSG00000003316	FALSE	(ENSMUSG00000003316 ~ A_oligodendrocyte_reference) BIC = -37.04;(ENSMUSG00000003316 ~ A_endothelial_reference + A_oligodendrocyte_reference) BIC = -35.81;(ENSMUSG00000003316 ~ A_microglia_reference + A_oligodendrocyte_reference) BIC = -35.32	3	TRUE	A_oligodendrocyte_reference = 2.8902;A_endothelial_reference = 1.3596;A_microglia_reference = 1.1905	NA	NA	0.00384944	0.233844	0.173945
Atp8b3	ATPase, class I, type 8B, member 3	10	79982330	80001869	-1	C1	ENSMUSG00000003341	FALSE	(ENSMUSG00000003341 ~ A_oligodendrocyte_reference) BIC = 55.37	1	FALSE	NA	NA	NA	0.0105753	NA	NA
Btbd2	BTB (POZ) domain containing 2	10	80105362	80119816	-1	C1	ENSMUSG00000003344	FALSE	(ENSMUSG00000003344 ~ A_endothelial_reference + A_oligodendrocyte_reference) BIC = -65.55;(ENSMUSG00000003344 ~ A_endothelial_reference + A_neuron_reference + A_oligodendrocyte_reference) BIC = -63.8;(ENSMUSG00000003344 ~ A_neuron_reference + A_oligodendrocyte_reference) BIC = -63.74;(ENSMUSG00000003344 ~ A_oligodendrocyte_reference) BIC = -63.6	4	TRUE	A_endothelial_reference = 2.009;A_oligodendrocyte_reference = 1.9577;A_neuron_reference = 1.3943	NA	0.163238	0.0502671	NA	0.0445332
Csnk1g2	casein kinase 1, gamma 2	10	80085525	80103516	1	C1	ENSMUSG00000003345	FALSE	(ENSMUSG00000003345 ~ A_endothelial_reference + A_microglia_reference + A_oligodendrocyte_reference) BIC = -61.81;(ENSMUSG00000003345 ~ A_endothelial_reference + A_oligodendrocyte_reference) BIC = -61.44;(ENSMUSG00000003345 ~ A_oligodendrocyte_reference) BIC = -61.05;(ENSMUSG00000003345 ~ A_neuron_reference + A_oligodendrocyte_reference) BIC = -60.87;(ENSMUSG00000003345 ~ A_endothelial_reference)…	6	TRUE	A_endothelial_reference = 1.9993;A_microglia_reference = 1.6613;A_oligodendrocyte_reference = 2.0866;A_neuron_reference = 1.6714	NA	0.0946386	0.0369223	0.0966452	0.0455788
Fam108a	family with sequence similarity 108, member A	10	80046394	80053086	-1	C1	ENSMUSG00000003346	FALSE	(ENSMUSG00000003346 ~ A_neuron_reference + A_oligodendrocyte_reference) BIC = -32.75;(ENSMUSG00000003346 ~ A_endothelial_reference + A_oligodendrocyte_reference) BIC = -31.94;(ENSMUSG00000003346 ~ A_endothelial_reference + A_microglia_reference + A_oligodendrocyte_reference) BIC = -31.55;(ENSMUSG00000003346 ~ A_endothelial_reference + A_neuron_reference + A_oligodendrocyte_reference) BIC = -31.44…	6	TRUE	A_neuron_reference = 1.8419;A_oligodendrocyte_reference = 2.5788;A_endothelial_reference = 1.7391;A_microglia_reference = 1.5799;A_astrocyte_reference = 1.4353	0.151201	0.0654904	0.00991472	0.114122	0.0820194
Mob3a	MOB kinase activator 3A	10	80148001	80164565	-1	C1	ENSMUSG00000003348	FALSE	(ENSMUSG00000003348 ~ A_neuron_reference) BIC = -57.42;(ENSMUSG00000003348 ~ A_endothelial_reference + A_neuron_reference) BIC = -55.84	2	TRUE	A_neuron_reference = 3.8168;A_endothelial_reference = 1.2439	NA	0.00013517	NA	NA	0.213528
Cacnb3	calcium channel, voltage-dependent, beta 3 subunit	15	98462651	98474961	1	F1	ENSMUSG00000003352	FALSE	(ENSMUSG00000003352 ~ A_neuron_reference + A_oligodendrocyte_reference) BIC = -58.63;(ENSMUSG00000003352 ~ A_microglia_reference + A_neuron_reference + A_oligodendrocyte_reference) BIC = -57.78;(ENSMUSG00000003352 ~ A_astrocyte_reference + A_microglia_reference + A_neuron_reference + A_oligodendrocyte_reference) BIC = -57.29	3	TRUE	A_neuron_reference = 4.6743;A_oligodendrocyte_reference = 4.4845;A_microglia_reference = 1.5919;A_astrocyte_reference = 1.5166	0.129371	2.95e-06	7.31e-06	0.111396	NA
Ccdc65	coiled-coil domain containing 65	15	98538625	98553757	1	F1	ENSMUSG00000003354	FALSE	(ENSMUSG00000003354 ~ A_neuron_reference) BIC = -1.35;(ENSMUSG00000003354 ~ A_astrocyte_reference + A_neuron_reference) BIC = 0.36	2	TRUE	A_neuron_reference = 3.6151;A_astrocyte_reference = 1.1929	0.232907	0.00030026	NA	NA	NA
Fkbp11	FK506 binding protein 11	15	98554804	98558629	-1	F1	ENSMUSG00000003355	FALSE	(ENSMUSG00000003355 ~ A_endothelial_reference) BIC = 25.25;(ENSMUSG00000003355 ~ A_endothelial_reference + A_neuron_reference) BIC = 25.35	2	TRUE	A_endothelial_reference = 3.0042;A_neuron_reference = 1.6946	NA	0.0901553	NA	NA	0.00266316
Ddx23	DEAD (Asp-Glu-Ala-Asp) box polypeptide 23	15	98475565	98493320	-1	F1	ENSMUSG00000003360	FALSE	(ENSMUSG00000003360 ~ A_neuron_reference) BIC = -63.51;(ENSMUSG00000003360 ~ A_endothelial_reference + A_neuron_reference) BIC = -63.31;(ENSMUSG00000003360 ~ A_endothelial_reference + A_oligodendrocyte_reference) BIC = -62.74;(ENSMUSG00000003360 ~ A_microglia_reference + A_neuron_reference) BIC = -62.43	4	TRUE	A_neuron_reference = 2.5117;A_endothelial_reference = 1.8238;A_oligodendrocyte_reference = 2.4783;A_microglia_reference = 1.4069	NA	0.0120136	0.0132027	0.159453	0.0681769
Pld3	phospholipase D family, member 3	7	28317019	28338237	-1	A3	ENSMUSG00000003363	FALSE	(ENSMUSG00000003363 ~ A_astrocyte_reference + A_oligodendrocyte_reference) BIC = -44.69	1	FALSE	NA	1.00387e-06	NA	0.000687789	NA	NA
Grik5	glutamate receptor, ionotropic, kainate 5 (gamma 2)	7	25794872	25857388	-1	A3	ENSMUSG00000003378	FALSE	(ENSMUSG00000003378 ~ A_endothelial_reference + A_oligodendrocyte_reference) BIC = -83.57;(ENSMUSG00000003378 ~ A_endothelial_reference + A_microglia_reference + A_oligodendrocyte_reference) BIC = -82.65	2	TRUE	A_endothelial_reference = 4.6665;A_oligodendrocyte_reference = 6.5156;A_microglia_reference = 1.4267	NA	NA	0	0.153668	3.06e-06
Rabac1	Rab acceptor 1 (prenylated)	7	25754769	25757747	-1	A3	ENSMUSG00000003380	FALSE	(ENSMUSG00000003380 ~ A_neuron_reference + A_oligodendrocyte_reference) BIC = -34.9	1	FALSE	NA	NA	0.331737	0.00237927	NA	NA
Etv3	ets variant gene 3	3	87329329	87344078	1	F1	ENSMUSG00000003382	FALSE	(ENSMUSG00000003382 ~ A_microglia_reference) BIC = -60.41;(ENSMUSG00000003382 ~ A_microglia_reference + A_oligodendrocyte_reference) BIC = -60.3;(ENSMUSG00000003382 ~ A_microglia_reference + A_neuron_reference + A_oligodendrocyte_reference) BIC = -59.02;(ENSMUSG00000003382 ~ A_astrocyte_reference + A_microglia_reference + A_oligodendrocyte_reference) BIC = -58.51	4	TRUE	A_microglia_reference = 2.4604;A_oligodendrocyte_reference = 1.722;A_neuron_reference = 1.3155;A_astrocyte_reference = 1.1408	0.253964	0.188332	0.0850719	0.0138779	NA
Prkcsh	protein kinase C substrate 80K-H	9	21807479	21818663	1	A3	ENSMUSG00000003402	FALSE	(ENSMUSG00000003402 ~ A_oligodendrocyte_reference) BIC = -66.95;(ENSMUSG00000003402 ~ A_endothelial_reference + A_oligodendrocyte_reference) BIC = -65.1	2	TRUE	A_oligodendrocyte_reference = 3.1343;A_endothelial_reference = 1.1429	NA	NA	0.00172288	NA	0.253099
Elavl3	ELAV (embryonic lethal, abnormal vision, Drosophila)-like 3 (Hu antigen C)	9	21819449	21856467	-1	A3	ENSMUSG00000003410	FALSE	(ENSMUSG00000003410 ~ A_endothelial_reference) BIC = -89.74;(ENSMUSG00000003410 ~ 1) BIC = -89.18;(ENSMUSG00000003410 ~ A_endothelial_reference + A_oligodendrocyte_reference) BIC = -88.87;(ENSMUSG00000003410 ~ A_astrocyte_reference + A_endothelial_reference) BIC = -88.65;(ENSMUSG00000003410 ~ A_endothelial_reference + A_neuron_reference) BIC = -88.47;(ENSMUSG00000003410 ~ A_neuron_reference) BIC …	6	TRUE	A_endothelial_reference = 2.008;A_oligodendrocyte_reference = 1.4738;A_astrocyte_reference = 1.4056;A_neuron_reference = 1.3358	0.159847	0.181615	0.140536	NA	0.0446452
Rab3b	RAB3B, member RAS oncogene family	4	108551668	108615929	1	C7	ENSMUSG00000003411	FALSE	(ENSMUSG00000003411 ~ A_neuron_reference) BIC = -7.85;(ENSMUSG00000003411 ~ A_endothelial_reference + A_neuron_reference) BIC = -7.62;(ENSMUSG00000003411 ~ A_endothelial_reference + A_microglia_reference + A_neuron_reference) BIC = -5.98	3	TRUE	A_neuron_reference = 5.1662;A_endothelial_reference = 1.7244;A_microglia_reference = 1.1935	NA	2.4e-07	NA	0.232684	0.0846286
St8sia6	ST8 alpha-N-acetyl-neuraminide alpha-2,8-sialyltransferase 6	2	13572647	13715435	-1	A1	ENSMUSG00000003418	FALSE	(ENSMUSG00000003418 ~ A_microglia_reference + A_neuron_reference + A_oligodendrocyte_reference) BIC = -14.98;(ENSMUSG00000003418 ~ A_neuron_reference + A_oligodendrocyte_reference) BIC = -13.05	2	TRUE	A_microglia_reference = 2.1427;A_neuron_reference = 2.1233;A_oligodendrocyte_reference = 2.4683	NA	0.0337264	0.0135742	0.0321364	NA
Fcgrt	Fc receptor, IgG, alpha chain transporter	7	52348363	52359192	-1	B4	ENSMUSG00000003420	FALSE	(ENSMUSG00000003420 ~ A_endothelial_reference + A_microglia_reference) BIC = -15.85	1	FALSE	NA	NA	NA	NA	0.0012115	0.122026
Nosip	nitric oxide synthase interacting protein	7	52317799	52333873	1	B4	ENSMUSG00000003421	FALSE	(ENSMUSG00000003421 ~ A_neuron_reference + A_oligodendrocyte_reference) BIC = -56.58;(ENSMUSG00000003421 ~ A_oligodendrocyte_reference) BIC = -56.29;(ENSMUSG00000003421 ~ 1) BIC = -55.73;(ENSMUSG00000003421 ~ A_microglia_reference) BIC = -55.34;(ENSMUSG00000003421 ~ A_microglia_reference + A_neuron_reference + A_oligodendrocyte_reference) BIC = -54.67	5	TRUE	A_neuron_reference = 1.8355;A_oligodendrocyte_reference = 1.8716;A_microglia_reference = 1.3715	NA	0.0664379	0.0612596	0.170228	NA
Pih1d1	PIH1 domain containing 1	7	52409673	52415439	1	B4	ENSMUSG00000003423	FALSE	(ENSMUSG00000003423 ~ A_neuron_reference + A_oligodendrocyte_reference) BIC = -48.19	1	FALSE	NA	NA	1.219e-07	0.0255658	NA	NA
Rps11	ribosomal protein S11	7	52377757	52379766	-1	B4	ENSMUSG00000003429	FALSE	(ENSMUSG00000003429 ~ A_neuron_reference + A_oligodendrocyte_reference) BIC = -49.58;(ENSMUSG00000003429 ~ A_endothelial_reference + A_neuron_reference + A_oligodendrocyte_reference) BIC = -48.05	2	TRUE	A_neuron_reference = 3.9112;A_oligodendrocyte_reference = 2.9208;A_endothelial_reference = 1.2354	NA	9.183e-05	0.00349115	NA	0.216695
Supt5h	suppressor of Ty 5 homolog (S. cerevisiae)	7	29099917	29123738	-1	A3	ENSMUSG00000003435	FALSE	(ENSMUSG00000003435 ~ A_microglia_reference) BIC = -60.1;(ENSMUSG00000003435 ~ 1) BIC = -58.24	2	TRUE	A_microglia_reference = 2.2169	NA	NA	NA	0.0266308	NA
Dll3	delta-like 3 (Drosophila)	7	29076673	29087257	-1	A3	ENSMUSG00000003436	FALSE	(ENSMUSG00000003436 ~ A_endothelial_reference + A_oligodendrocyte_reference) BIC = 4.25;(ENSMUSG00000003436 ~ A_oligodendrocyte_reference) BIC = 6.09	2	TRUE	A_endothelial_reference = 2.1703;A_oligodendrocyte_reference = 3.7772	NA	NA	0.000158572	NA	0.0299849
Paf1	Paf1, RNA polymerase II associated factor, homolog (S. cerevisiae)	7	29177970	29184407	1	A3	ENSMUSG00000003437	FALSE	(ENSMUSG00000003437 ~ A_astrocyte_reference) BIC = -65.29	1	FALSE	NA	0.00100052	NA	NA	NA	NA
Timm50	translocase of inner mitochondrial membrane 50 homolog (yeast)	7	29090535	29097091	-1	A3	ENSMUSG00000003438	FALSE	(ENSMUSG00000003438 ~ A_neuron_reference + A_oligodendrocyte_reference) BIC = -63.76;(ENSMUSG00000003438 ~ A_astrocyte_reference + A_oligodendrocyte_reference) BIC = -63.55;(ENSMUSG00000003438 ~ A_astrocyte_reference + A_neuron_reference + A_oligodendrocyte_reference) BIC = -63.05	3	TRUE	A_neuron_reference = 2.0044;A_oligodendrocyte_reference = 3.4437;A_astrocyte_reference = 1.9199	0.0548734	0.0450313	0.00057391	NA	NA
Med29	mediator complex subunit 29	7	29171165	29177727	-1	A3	ENSMUSG00000003444	FALSE	(ENSMUSG00000003444 ~ A_neuron_reference + A_oligodendrocyte_reference) BIC = -45.85;(ENSMUSG00000003444 ~ A_astrocyte_reference + A_neuron_reference + A_oligodendrocyte_reference) BIC = -44.61;(ENSMUSG00000003444 ~ A_astrocyte_reference + A_oligodendrocyte_reference) BIC = -44.12	3	TRUE	A_neuron_reference = 2.3279;A_oligodendrocyte_reference = 4.2074;A_astrocyte_reference = 1.6442	0.100126	0.0199173	2.584e-05	NA	NA
Bicd1	bicaudal D homolog 1 (Drosophila)	6	149357506	149511851	1	G3	ENSMUSG00000003452	FALSE	(ENSMUSG00000003452 ~ A_endothelial_reference + A_oligodendrocyte_reference) BIC = -42.6;(ENSMUSG00000003452 ~ A_endothelial_reference + A_neuron_reference + A_oligodendrocyte_reference) BIC = -41.93;(ENSMUSG00000003452 ~ A_endothelial_reference) BIC = -41.86	3	TRUE	A_endothelial_reference = 2.589;A_oligodendrocyte_reference = 1.6848;A_neuron_reference = 1.4987	NA	0.13395	0.0920332	NA	0.0096258
Ncstn	nicastrin	1	173996144	174012926	-1	H3	ENSMUSG00000003458	FALSE	(ENSMUSG00000003458 ~ A_microglia_reference) BIC = -81.8;(ENSMUSG00000003458 ~ A_astrocyte_reference + A_microglia_reference) BIC = -80.45;(ENSMUSG00000003458 ~ A_astrocyte_reference) BIC = -79.81	3	TRUE	A_microglia_reference = 2.6671;A_astrocyte_reference = 1.6838	0.0922257	NA	NA	0.00765066	NA
Pex19	peroxisomal biogenesis factor 19	1	174056886	174066624	1	H3	ENSMUSG00000003464	FALSE	(ENSMUSG00000003464 ~ A_astrocyte_reference + A_oligodendrocyte_reference) BIC = -99.33;(ENSMUSG00000003464 ~ A_microglia_reference + A_oligodendrocyte_reference) BIC = -98.81;(ENSMUSG00000003464 ~ A_astrocyte_reference + A_microglia_reference + A_oligodendrocyte_reference) BIC = -97.56;(ENSMUSG00000003464 ~ A_microglia_reference + A_neuron_reference + A_oligodendrocyte_reference) BIC = -97.53	4	TRUE	A_astrocyte_reference = 1.8869;A_oligodendrocyte_reference = 3.5065;A_microglia_reference = 1.7393;A_neuron_reference = 1.3153	0.0591672	0.188421	0.00045399	0.0819865	NA
Phyhip	phytanoyl-CoA hydroxylase interacting protein	14	70857283	70868639	1	D2	ENSMUSG00000003469	FALSE	(ENSMUSG00000003469 ~ A_neuron_reference + A_oligodendrocyte_reference) BIC = -68.7	1	FALSE	NA	NA	1.42868e-09	0.000335111	NA	NA
Crhr2	corticotropin releasing hormone receptor 2	6	55040043	55083010	-1	B3	ENSMUSG00000003476	FALSE	(ENSMUSG00000003476 ~ A_oligodendrocyte_reference) BIC = 12.83;(ENSMUSG00000003476 ~ 1) BIC = 12.98;(ENSMUSG00000003476 ~ A_microglia_reference) BIC = 13.15;(ENSMUSG00000003476 ~ A_endothelial_reference + A_oligodendrocyte_reference) BIC = 14.13;(ENSMUSG00000003476 ~ A_neuron_reference) BIC = 14.37;(ENSMUSG00000003476 ~ A_endothelial_reference + A_microglia_reference) BIC = 14.57	6	TRUE	A_oligodendrocyte_reference = 1.8747;A_microglia_reference = 1.7816;A_endothelial_reference = 1.3185;A_neuron_reference = 1.3314	NA	0.183063	0.060831	0.0748109	0.187329
Inmt	indolethylamine N-methyltransferase	6	55120620	55125037	-1	B3	ENSMUSG00000003477	FALSE	(ENSMUSG00000003477 ~ A_endothelial_reference + A_neuron_reference) BIC = 51.76;(ENSMUSG00000003477 ~ A_endothelial_reference + A_oligodendrocyte_reference) BIC = 52.2;(ENSMUSG00000003477 ~ A_astrocyte_reference + A_endothelial_reference) BIC = 53.01;(ENSMUSG00000003477 ~ A_endothelial_reference + A_microglia_reference + A_neuron_reference) BIC = 53.33;(ENSMUSG00000003477 ~ A_astrocyte_reference …	6	TRUE	A_endothelial_reference = 3.2041;A_neuron_reference = 2.4857;A_oligodendrocyte_reference = 2.0712;A_astrocyte_reference = 1.808;A_microglia_reference = 1.2423	0.07061	0.0129291	0.0383356	0.214137	0.00135472
Impdh1	inosine 5'-phosphate dehydrogenase 1	6	29150434	29166364	-1	A3.3	ENSMUSG00000003500	FALSE	(ENSMUSG00000003500 ~ A_microglia_reference + A_neuron_reference + A_oligodendrocyte_reference) BIC = -70.21;(ENSMUSG00000003500 ~ A_astrocyte_reference + A_microglia_reference + A_oligodendrocyte_reference) BIC = -69.69;(ENSMUSG00000003500 ~ A_microglia_reference) BIC = -69.44;(ENSMUSG00000003500 ~ A_endothelial_reference + A_microglia_reference) BIC = -69.26;(ENSMUSG00000003500 ~ A_astrocyte_re…	9	TRUE	A_microglia_reference = 2.1455;A_neuron_reference = 1.9258;A_oligodendrocyte_reference = 1.9012;A_astrocyte_reference = 1.721;A_endothelial_reference = 1.6273	0.0852463	0.0541319	0.0572697	0.0319165	0.103665
Dusp3	dual specificity phosphatase 3 (vaccinia virus phosphatase VH1-related)	11	101832457	101848327	-1	D	ENSMUSG00000003518	FALSE	(ENSMUSG00000003518 ~ A_endothelial_reference + A_oligodendrocyte_reference) BIC = -78.51;(ENSMUSG00000003518 ~ A_endothelial_reference + A_microglia_reference + A_oligodendrocyte_reference) BIC = -77.31;(ENSMUSG00000003518 ~ A_endothelial_reference + A_neuron_reference + A_oligodendrocyte_reference) BIC = -77.18;(ENSMUSG00000003518 ~ A_endothelial_reference + A_neuron_reference) BIC = -76.85	4	TRUE	A_endothelial_reference = 2.5783;A_oligodendrocyte_reference = 2.8071;A_microglia_reference = 1.3429;A_neuron_reference = 1.7665	NA	0.0773172	0.00499928	0.179308	0.00992868
Prodh	proline dehydrogenase	16	18060450	18090296	-1	A3	ENSMUSG00000003526	FALSE	(ENSMUSG00000003526 ~ A_neuron_reference) BIC = -21.06	1	FALSE	NA	NA	0.00403642	NA	NA	NA
Dgcr14	DiGeorge syndrome critical region gene 14	16	17900804	17911441	-1	A3	ENSMUSG00000003527	FALSE	(ENSMUSG00000003527 ~ A_oligodendrocyte_reference) BIC = -65.06	1	FALSE	NA	NA	NA	0.000988114	NA	NA
Slc25a1	solute carrier family 25 (mitochondrial carrier, citrate transporter), member 1	16	17925304	17928312	-1	A3	ENSMUSG00000003528	FALSE	(ENSMUSG00000003528 ~ A_endothelial_reference + A_neuron_reference) BIC = -54.82;(ENSMUSG00000003528 ~ A_astrocyte_reference + A_endothelial_reference + A_neuron_reference) BIC = -54.6	2	TRUE	A_endothelial_reference = 3.6577;A_neuron_reference = 4.3018;A_astrocyte_reference = 1.625	0.104162	1.694e-05	NA	NA	0.0002545
Dgcr6	DiGeorge syndrome critical region gene 6	16	18052953	18071725	1	A3	ENSMUSG00000003531	FALSE	(ENSMUSG00000003531 ~ A_oligodendrocyte_reference) BIC = -51.13;(ENSMUSG00000003531 ~ A_neuron_reference + A_oligodendrocyte_reference) BIC = -49.33	2	TRUE	A_oligodendrocyte_reference = 4.7329;A_neuron_reference = 1.1626	NA	0.24501	2.21e-06	NA	NA
Ddr1	discoidin domain receptor family, member 1	17	35818512	35841566	-1	B1	ENSMUSG00000003534	FALSE	(ENSMUSG00000003534 ~ A_endothelial_reference + A_neuron_reference) BIC = -52.24	1	FALSE	NA	NA	6.91007e-05	NA	NA	0.0105078
Ier3	immediate early response 3	17	35958629	35959868	1	B1	ENSMUSG00000003541	FALSE	(ENSMUSG00000003541 ~ A_endothelial_reference + A_oligodendrocyte_reference) BIC = -20.35;(ENSMUSG00000003541 ~ A_endothelial_reference + A_neuron_reference) BIC = -20.17;(ENSMUSG00000003541 ~ A_astrocyte_reference + A_endothelial_reference) BIC = -19.49;(ENSMUSG00000003541 ~ A_endothelial_reference) BIC = -19.06;(ENSMUSG00000003541 ~ A_oligodendrocyte_reference) BIC = -18.97	5	TRUE	A_endothelial_reference = 2.2872;A_oligodendrocyte_reference = 2.129;A_neuron_reference = 1.9999;A_astrocyte_reference = 1.8336	0.0667103	0.0455087	0.0332568	NA	0.0221857
Fosb	FBJ osteosarcoma oncogene B	7	19888070	19895394	-1	A3	ENSMUSG00000003545	FALSE	(ENSMUSG00000003545 ~ A_endothelial_reference + A_neuron_reference) BIC = 13.32;(ENSMUSG00000003545 ~ A_astrocyte_reference + A_endothelial_reference) BIC = 13.55;(ENSMUSG00000003545 ~ A_astrocyte_reference + A_endothelial_reference + A_neuron_reference) BIC = 14.86	3	TRUE	A_endothelial_reference = 2.8539;A_neuron_reference = 2.1713;A_astrocyte_reference = 2.0407	0.0412828	0.029907	NA	NA	0.00431912
Klc4	kinesin light chain 4	17	46767574	46782104	-1	C	ENSMUSG00000003546	FALSE	(ENSMUSG00000003546 ~ A_endothelial_reference + A_neuron_reference) BIC = -52.9	1	FALSE	NA	NA	1.60764e-05	NA	NA	0.0063035
Ercc1	excision repair cross-complementing rodent repair deficiency, complementation group 1	7	19930127	19941873	1	A3	ENSMUSG00000003549	FALSE	(ENSMUSG00000003549 ~ A_microglia_reference) BIC = -58.3;(ENSMUSG00000003549 ~ A_astrocyte_reference) BIC = -57.42;(ENSMUSG00000003549 ~ A_endothelial_reference + A_microglia_reference) BIC = -57.18;(ENSMUSG00000003549 ~ A_oligodendrocyte_reference) BIC = -57.18;(ENSMUSG00000003549 ~ A_endothelial_reference) BIC = -56.88;(ENSMUSG00000003549 ~ A_astrocyte_reference + A_endothelial_reference) BIC =…	7	TRUE	A_microglia_reference = 1.9937;A_astrocyte_reference = 1.8234;A_endothelial_reference = 1.5495;A_oligodendrocyte_reference = 1.8678	0.0682389	NA	0.061795	0.0461824	0.121273
As3mt	arsenic (+3 oxidation state) methyltransferase	19	46781933	46815585	1	C3	ENSMUSG00000003559	FALSE	(ENSMUSG00000003559 ~ A_endothelial_reference + A_neuron_reference) BIC = -38.3;(ENSMUSG00000003559 ~ A_neuron_reference) BIC = -37.76	2	TRUE	A_endothelial_reference = 1.8608;A_neuron_reference = 8.9244	NA	0	NA	NA	0.0627655
Homer3	homer homolog 3 (Drosophila)	8	72806726	72818260	1	B3.3	ENSMUSG00000003573	FALSE	(ENSMUSG00000003573 ~ 1) BIC = -8;(ENSMUSG00000003573 ~ A_endothelial_reference) BIC = -6.78	2	TRUE	A_endothelial_reference = 1.3886	NA	NA	NA	NA	0.164964
Crtc1	CREB regulated transcription coactivator 1	8	72906254	72963478	-1	B3.3	ENSMUSG00000003575	FALSE	(ENSMUSG00000003575 ~ A_microglia_reference + A_oligodendrocyte_reference) BIC = -67.53;(ENSMUSG00000003575 ~ A_oligodendrocyte_reference) BIC = -67.45;(ENSMUSG00000003575 ~ A_microglia_reference + A_neuron_reference) BIC = -67.39;(ENSMUSG00000003575 ~ A_neuron_reference + A_oligodendrocyte_reference) BIC = -67.35;(ENSMUSG00000003575 ~ A_microglia_reference + A_neuron_reference + A_oligodendrocyt…	7	TRUE	A_microglia_reference = 1.739;A_oligodendrocyte_reference = 2.3341;A_neuron_reference = 1.9956;A_astrocyte_reference = 1.5008	0.133411	0.0459723	0.0195919	0.08204	NA
Rnf215	ring finger protein 215	11	4035205	4041175	1	A1	ENSMUSG00000003581	FALSE	(ENSMUSG00000003581 ~ A_microglia_reference) BIC = -59.34;(ENSMUSG00000003581 ~ A_endothelial_reference + A_microglia_reference) BIC = -58.86	2	TRUE	A_microglia_reference = 4.4552;A_endothelial_reference = 1.5885	NA	NA	NA	8.38e-06	0.112167
Sec14l2	SEC14-like 2 (S. cerevisiae)	11	3997042	4023418	-1	A1	ENSMUSG00000003585	FALSE	(ENSMUSG00000003585 ~ A_microglia_reference + A_neuron_reference + A_oligodendrocyte_reference) BIC = -51.21;(ENSMUSG00000003585 ~ A_endothelial_reference + A_microglia_reference + A_neuron_reference + A_oligodendrocyte_reference) BIC = -49.39	2	TRUE	A_microglia_reference = 2.7931;A_neuron_reference = 4.6647;A_oligodendrocyte_reference = 2.9396;A_endothelial_reference = 1.1093	NA	3.09e-06	0.00328675	0.00522135	0.267284
Aven	apoptosis, caspase activation inhibitor	2	112333121	112474730	1	E3	ENSMUSG00000003604	FALSE	(ENSMUSG00000003604 ~ A_microglia_reference) BIC = -41.49	1	FALSE	NA	NA	NA	NA	0.0157351	NA
Cp	ceruloplasmin	3	19857054	19909145	1	A2	ENSMUSG00000003617	FALSE	(ENSMUSG00000003617 ~ A_microglia_reference) BIC = 23.96;(ENSMUSG00000003617 ~ A_microglia_reference + A_oligodendrocyte_reference) BIC = 24.77;(ENSMUSG00000003617 ~ A_astrocyte_reference + A_microglia_reference + A_oligodendrocyte_reference) BIC = 25.56;(ENSMUSG00000003617 ~ A_endothelial_reference + A_microglia_reference + A_oligodendrocyte_reference) BIC = 25.76;(ENSMUSG00000003617 ~ A_endothe…	6	TRUE	A_microglia_reference = 3.4973;A_oligodendrocyte_reference = 1.7108;A_astrocyte_reference = 1.5287;A_endothelial_reference = 1.3514	0.126331	NA	0.0871231	0.00047005	0.176578
Crot	carnitine O-octanoyltransferase	5	8966033	8997324	-1	A1	ENSMUSG00000003623	FALSE	(ENSMUSG00000003623 ~ A_microglia_reference) BIC = -24.14;(ENSMUSG00000003623 ~ A_oligodendrocyte_reference) BIC = -22.29	2	TRUE	A_microglia_reference = 2.3051;A_oligodendrocyte_reference = 1.8598	NA	NA	0.0629113	0.0211601	NA
Rps6ka1	ribosomal protein S6 kinase polypeptide 1	4	133403205	133443712	-1	D3	ENSMUSG00000003644	FALSE	(ENSMUSG00000003644 ~ A_endothelial_reference + A_neuron_reference) BIC = -29.73;(ENSMUSG00000003644 ~ A_endothelial_reference + A_oligodendrocyte_reference) BIC = -28.03	2	TRUE	A_endothelial_reference = 2.6483;A_neuron_reference = 3.3882;A_oligodendrocyte_reference = 3.0807	NA	0.000703597	0.00206539	NA	0.00809057
Calb2	calbindin 2	8	112661402	112692110	-1	E1	ENSMUSG00000003657	FALSE	(ENSMUSG00000003657 ~ 1) BIC = 10.88;(ENSMUSG00000003657 ~ A_oligodendrocyte_reference) BIC = 12.04;(ENSMUSG00000003657 ~ A_microglia_reference) BIC = 12.37;(ENSMUSG00000003657 ~ A_neuron_reference) BIC = 12.44	4	TRUE	A_oligodendrocyte_reference = 1.4099;A_microglia_reference = 1.2977;A_neuron_reference = 1.2737	NA	0.20278	0.158559	0.194376	NA
Snrnp200	small nuclear ribonucleoprotein 200 (U5)	2	127034122	127066187	1	F1	ENSMUSG00000003660	FALSE	(ENSMUSG00000003660 ~ A_endothelial_reference) BIC = -67.37;(ENSMUSG00000003660 ~ A_endothelial_reference + A_oligodendrocyte_reference) BIC = -65.87;(ENSMUSG00000003660 ~ A_astrocyte_reference + A_endothelial_reference) BIC = -65.56	3	TRUE	A_endothelial_reference = 3.2145;A_oligodendrocyte_reference = 1.2704;A_astrocyte_reference = 1.1608	0.245743	NA	0.203958	NA	0.00130667
Ciao1	cytosolic iron-sulfur protein assembly 1 homolog (S. cerevisiae)	2	127066674	127073552	-1	F1	ENSMUSG00000003662	FALSE	(ENSMUSG00000003662 ~ A_neuron_reference + A_oligodendrocyte_reference) BIC = -72.41;(ENSMUSG00000003662 ~ A_neuron_reference) BIC = -72.34;(ENSMUSG00000003662 ~ A_astrocyte_reference) BIC = -71.06;(ENSMUSG00000003662 ~ 1) BIC = -70.94	4	TRUE	A_neuron_reference = 1.9152;A_oligodendrocyte_reference = 1.7393;A_astrocyte_reference = 1.7879	0.0737859	0.0554639	0.0819871	NA	NA
Has1	hyaluronan synthase1	17	17980292	17992152	-1	A3.2	ENSMUSG00000003665	FALSE	(ENSMUSG00000003665 ~ A_endothelial_reference + A_neuron_reference) BIC = 25.34;(ENSMUSG00000003665 ~ A_astrocyte_reference + A_endothelial_reference) BIC = 26.81	2	TRUE	A_endothelial_reference = 2.4083;A_neuron_reference = 2.8133;A_astrocyte_reference = 2.5212	0.0116949	0.0049042	NA	NA	0.0160284
Taf6l	TAF6-like RNA polymerase II, p300/CBP-associated factor (PCAF)-associated factor	19	8848844	8860907	-1	A	ENSMUSG00000003680	FALSE	(ENSMUSG00000003680 ~ A_microglia_reference + A_oligodendrocyte_reference) BIC = -24.26;(ENSMUSG00000003680 ~ A_oligodendrocyte_reference) BIC = -22.99	2	TRUE	A_microglia_reference = 2.0389;A_oligodendrocyte_reference = 2.7153	NA	NA	0.00662059	0.0414617	NA
Insig2	insulin induced gene 2	1	123200930	123229166	-1	E2.3	ENSMUSG00000003721	FALSE	(ENSMUSG00000003721 ~ A_microglia_reference + A_neuron_reference) BIC = -72.42;(ENSMUSG00000003721 ~ A_neuron_reference) BIC = -71.04;(ENSMUSG00000003721 ~ A_neuron_reference + A_oligodendrocyte_reference) BIC = -70.55;(ENSMUSG00000003721 ~ A_microglia_reference + A_neuron_reference + A_oligodendrocyte_reference) BIC = -70.52	4	TRUE	A_microglia_reference = 1.9315;A_neuron_reference = 5.5932;A_oligodendrocyte_reference = 1.3066	NA	2e-08	0.191344	0.0534166	NA
Kpna6	karyopherin (importin) alpha 6	4	129321224	129350011	-1	D2.2	ENSMUSG00000003731	FALSE	(ENSMUSG00000003731 ~ A_endothelial_reference) BIC = -83.16	1	FALSE	NA	NA	NA	NA	NA	0.000215851
Man1a	mannosidase 1, alpha	10	53624594	53795602	-1	B3	ENSMUSG00000003746	FALSE	(ENSMUSG00000003746 ~ A_astrocyte_reference + A_neuron_reference) BIC = -16.13;(ENSMUSG00000003746 ~ A_neuron_reference) BIC = -15.21	2	TRUE	A_astrocyte_reference = 1.9545;A_neuron_reference = 2.5444	0.0506436	0.0109462	NA	NA	NA
Itpkc	inositol 1,4,5-trisphosphate 3-kinase C	7	27992191	28013647	-1	A3	ENSMUSG00000003752	FALSE	(ENSMUSG00000003752 ~ A_neuron_reference) BIC = -44.69;(ENSMUSG00000003752 ~ A_neuron_reference + A_oligodendrocyte_reference) BIC = -44.67;(ENSMUSG00000003752 ~ A_astrocyte_reference + A_neuron_reference) BIC = -43.98;(ENSMUSG00000003752 ~ A_astrocyte_reference + A_neuron_reference + A_oligodendrocyte_reference) BIC = -43.53;(ENSMUSG00000003752 ~ A_microglia_reference + A_neuron_reference) BIC =…	5	TRUE	A_neuron_reference = 3.3539;A_oligodendrocyte_reference = 1.6537;A_astrocyte_reference = 1.4441;A_microglia_reference = 1.337	0.148714	0.00079671	0.0981906	0.181227	NA
Adck4	aarF domain containing kinase 4	7	28018042	28047271	1	A3	ENSMUSG00000003762	FALSE	(ENSMUSG00000003762 ~ A_astrocyte_reference + A_oligodendrocyte_reference) BIC = -17.81;(ENSMUSG00000003762 ~ A_neuron_reference + A_oligodendrocyte_reference) BIC = -17.37;(ENSMUSG00000003762 ~ A_oligodendrocyte_reference) BIC = -17.34	3	TRUE	A_astrocyte_reference = 1.8402;A_oligodendrocyte_reference = 2.7806;A_neuron_reference = 1.727	0.06574	0.0841673	0.00542535	NA	NA
Brd8	bromodomain containing 8	18	34758269	34784255	-1	B1	ENSMUSG00000003778	FALSE	(ENSMUSG00000003778 ~ A_astrocyte_reference + A_oligodendrocyte_reference) BIC = -57.59;(ENSMUSG00000003778 ~ A_oligodendrocyte_reference) BIC = -57.22;(ENSMUSG00000003778 ~ A_microglia_reference + A_oligodendrocyte_reference) BIC = -56.95;(ENSMUSG00000003778 ~ A_endothelial_reference + A_microglia_reference + A_oligodendrocyte_reference) BIC = -56.74;(ENSMUSG00000003778 ~ A_astrocyte_reference +…	7	TRUE	A_astrocyte_reference = 1.8419;A_oligodendrocyte_reference = 2.3196;A_microglia_reference = 1.7517;A_endothelial_reference = 1.5891;A_neuron_reference = 2.6926	0.0654918	0.00708893	0.0203609	0.0798247	0.112035
Farsa	phenylalanyl-tRNA synthetase, alpha subunit	8	87380888	87393156	1	C3	ENSMUSG00000003808	FALSE	(ENSMUSG00000003808 ~ A_endothelial_reference + A_microglia_reference) BIC = -57.21;(ENSMUSG00000003808 ~ A_astrocyte_reference + A_endothelial_reference) BIC = -55.58;(ENSMUSG00000003808 ~ A_astrocyte_reference + A_endothelial_reference + A_microglia_reference) BIC = -55.33	3	TRUE	A_endothelial_reference = 2.9035;A_microglia_reference = 2.4541;A_astrocyte_reference = 1.6411	0.100783	NA	NA	0.0141236	0.00369059
Gcdh	glutaryl-Coenzyme A dehydrogenase	8	87410292	87417820	-1	C3	ENSMUSG00000003809	FALSE	(ENSMUSG00000003809 ~ A_microglia_reference) BIC = -73.01;(ENSMUSG00000003809 ~ A_astrocyte_reference) BIC = -71.51	2	TRUE	A_microglia_reference = 2.3568;A_astrocyte_reference = 2.0092	0.0445184	NA	NA	0.0184332	NA
Mast2	microtubule associated serine/threonine kinase 2	4	115979367	116136788	-1	D1	ENSMUSG00000003810	FALSE	(ENSMUSG00000003810 ~ 1) BIC = -62.67;(ENSMUSG00000003810 ~ A_microglia_reference) BIC = -60.98	2	TRUE	A_microglia_reference = 1.2285	NA	NA	NA	0.219253	NA
Dnase2a	deoxyribonuclease II alpha	8	87432459	87446814	1	C3	ENSMUSG00000003812	FALSE	(ENSMUSG00000003812 ~ A_endothelial_reference + A_neuron_reference) BIC = -46.92	1	FALSE	NA	NA	0.0139346	NA	NA	0.0166856
Rad23a	RAD23a homolog (S. cerevisiae)	8	87357918	87364564	-1	C3	ENSMUSG00000003813	FALSE	(ENSMUSG00000003813 ~ A_microglia_reference + A_neuron_reference) BIC = -47.09;(ENSMUSG00000003813 ~ A_astrocyte_reference + A_neuron_reference) BIC = -46.01;(ENSMUSG00000003813 ~ 1) BIC = -45.66	3	TRUE	A_microglia_reference = 2.4066;A_neuron_reference = 2.3062;A_astrocyte_reference = 2.171	0.0299278	0.0211017	NA	0.0161008	NA
Calr	calreticulin	8	87365749	87370833	-1	C3	ENSMUSG00000003814	FALSE	(ENSMUSG00000003814 ~ A_microglia_reference) BIC = -40.66;(ENSMUSG00000003814 ~ A_astrocyte_reference) BIC = -39.78;(ENSMUSG00000003814 ~ A_astrocyte_reference + A_neuron_reference) BIC = -38.84	3	TRUE	A_microglia_reference = 2.8501;A_astrocyte_reference = 2.2992;A_neuron_reference = 1.4501	0.0214916	0.14703	NA	0.00436989	NA
Syce2	synaptonemal complex central element protein 2	8	87396010	87412120	1	C3	ENSMUSG00000003824	FALSE	(ENSMUSG00000003824 ~ A_endothelial_reference + A_oligodendrocyte_reference) BIC = -0.7;(ENSMUSG00000003824 ~ A_endothelial_reference + A_neuron_reference + A_oligodendrocyte_reference) BIC = -0.42;(ENSMUSG00000003824 ~ A_neuron_reference + A_oligodendrocyte_reference) BIC = 0.08;(ENSMUSG00000003824 ~ A_neuron_reference) BIC = 0.34;(ENSMUSG00000003824 ~ A_astrocyte_reference + A_endothelial_refer…	6	TRUE	A_endothelial_reference = 2.1631;A_oligodendrocyte_reference = 2.5698;A_neuron_reference = 1.929;A_astrocyte_reference = 1.2819;A_microglia_reference = 1.115	0.199866	0.0537274	0.0101747	0.264843	0.0305362
Nfat5	nuclear factor of activated T cells 5	8	109817370	109903417	1	D3	ENSMUSG00000003847	FALSE	(ENSMUSG00000003847 ~ A_oligodendrocyte_reference) BIC = -26.79;(ENSMUSG00000003847 ~ A_neuron_reference + A_oligodendrocyte_reference) BIC = -25.38;(ENSMUSG00000003847 ~ A_astrocyte_reference + A_oligodendrocyte_reference) BIC = -24.86	3	TRUE	A_oligodendrocyte_reference = 2.1497;A_neuron_reference = 1.2993;A_astrocyte_reference = 1.1123	0.266026	0.193856	0.0315798	NA	NA
Nob1	NIN1/RPN12 binding protein 1 homolog (S. cerevisiae)	8	109936386	109948951	-1	D3	ENSMUSG00000003848	FALSE	(ENSMUSG00000003848 ~ A_endothelial_reference + A_microglia_reference + A_oligodendrocyte_reference) BIC = -60.87;(ENSMUSG00000003848 ~ A_endothelial_reference + A_oligodendrocyte_reference) BIC = -60.67;(ENSMUSG00000003848 ~ A_endothelial_reference + A_microglia_reference) BIC = -60.05	3	TRUE	A_endothelial_reference = 2.7377;A_microglia_reference = 1.9825;A_oligodendrocyte_reference = 2.2107	NA	NA	0.0270585	0.0474206	0.0061875
Nqo1	NAD(P)H dehydrogenase, quinone 1	8	109912125	109927106	-1	D3	ENSMUSG00000003849	FALSE	(ENSMUSG00000003849 ~ A_endothelial_reference + A_microglia_reference + A_oligodendrocyte_reference) BIC = -21.15	1	FALSE	NA	NA	NA	0.000697539	2.13628e-05	0.0672791
Ppfia3	protein tyrosine phosphatase, receptor type, f polypeptide (PTPRF), interacting protein (liprin), alpha 3	7	52594496	52622389	-1	B4	ENSMUSG00000003863	FALSE	(ENSMUSG00000003863 ~ A_neuron_reference + A_oligodendrocyte_reference) BIC = -54.96;(ENSMUSG00000003863 ~ A_astrocyte_reference + A_neuron_reference + A_oligodendrocyte_reference) BIC = -54.34;(ENSMUSG00000003863 ~ A_microglia_reference + A_neuron_reference + A_oligodendrocyte_reference) BIC = -53.08	3	TRUE	A_neuron_reference = 2.5467;A_oligodendrocyte_reference = 2.2986;A_astrocyte_reference = 1.5162;A_microglia_reference = 1.111	0.129464	0.0108738	0.0215269	0.266579	NA
Gys1	glycogen synthase 1, muscle	7	52690214	52711989	1	B4	ENSMUSG00000003865	FALSE	(ENSMUSG00000003865 ~ A_neuron_reference) BIC = -54.98;(ENSMUSG00000003865 ~ 1) BIC = -54.71;(ENSMUSG00000003865 ~ A_endothelial_reference + A_oligodendrocyte_reference) BIC = -54.68;(ENSMUSG00000003865 ~ A_endothelial_reference + A_neuron_reference) BIC = -54.32;(ENSMUSG00000003865 ~ A_endothelial_reference) BIC = -53.85;(ENSMUSG00000003865 ~ A_oligodendrocyte_reference) BIC = -53.59	6	TRUE	A_neuron_reference = 1.8322;A_endothelial_reference = 1.666;A_oligodendrocyte_reference = 1.6996	NA	0.0669226	0.0892007	NA	0.0957213
Ruvbl2	RuvB-like protein 2	7	52677222	52693466	-1	B4	ENSMUSG00000003868	FALSE	(ENSMUSG00000003868 ~ A_astrocyte_reference + A_oligodendrocyte_reference) BIC = -61.34;(ENSMUSG00000003868 ~ 1) BIC = -60.11;(ENSMUSG00000003868 ~ A_astrocyte_reference + A_microglia_reference + A_oligodendrocyte_reference) BIC = -59.9;(ENSMUSG00000003868 ~ A_neuron_reference + A_oligodendrocyte_reference) BIC = -59.83;(ENSMUSG00000003868 ~ A_oligodendrocyte_reference) BIC = -59.81	5	TRUE	A_astrocyte_reference = 2.096;A_oligodendrocyte_reference = 2.105;A_microglia_reference = 1.2642;A_neuron_reference = 1.724	0.0360866	0.0847137	0.035295	0.206166	NA
Lin7b	lin-7 homolog B (C. elegans)	7	52623261	52625953	-1	B4	ENSMUSG00000003872	FALSE	(ENSMUSG00000003872 ~ A_oligodendrocyte_reference) BIC = -27.69;(ENSMUSG00000003872 ~ A_endothelial_reference + A_oligodendrocyte_reference) BIC = -27.58	2	TRUE	A_oligodendrocyte_reference = 5.394;A_endothelial_reference = 1.6881	NA	NA	7e-08	NA	0.0913832
Bax	BCL2-associated X protein	7	52717065	52722268	-1	B4	ENSMUSG00000003873	FALSE	(ENSMUSG00000003873 ~ A_neuron_reference + A_oligodendrocyte_reference) BIC = -60.05;(ENSMUSG00000003873 ~ A_endothelial_reference + A_neuron_reference + A_oligodendrocyte_reference) BIC = -58.91;(ENSMUSG00000003873 ~ A_microglia_reference + A_neuron_reference + A_oligodendrocyte_reference) BIC = -58.58	3	TRUE	A_neuron_reference = 3.7004;A_oligodendrocyte_reference = 6.1954;A_endothelial_reference = 1.3584;A_microglia_reference = 1.2529	NA	0.00021523	0	0.210243	0.174322
Tfam	transcription factor A, mitochondrial	10	70688212	70701028	-1	B5.3	ENSMUSG00000003923	FALSE	(ENSMUSG00000003923 ~ A_microglia_reference) BIC = -86.91;(ENSMUSG00000003923 ~ A_neuron_reference) BIC = -86.87;(ENSMUSG00000003923 ~ 1) BIC = -86.23;(ENSMUSG00000003923 ~ A_astrocyte_reference) BIC = -86.19;(ENSMUSG00000003923 ~ A_microglia_reference + A_neuron_reference) BIC = -84.91	5	TRUE	A_microglia_reference = 1.6188;A_neuron_reference = 1.6022;A_astrocyte_reference = 1.7428	0.0813715	0.109117	NA	0.105485	NA
Zfp81	zinc finger protein 81	17	33466287	33495823	-1	B1	ENSMUSG00000003929	FALSE	(ENSMUSG00000003929 ~ A_endothelial_reference + A_neuron_reference) BIC = -48.07;(ENSMUSG00000003929 ~ A_endothelial_reference + A_neuron_reference + A_oligodendrocyte_reference) BIC = -47.12	2	TRUE	A_endothelial_reference = 3.8836;A_neuron_reference = 2.1199;A_oligodendrocyte_reference = 1.4166	NA	0.0340168	0.156595	NA	0.00010293
Efnb3	ephrin B3	11	69367594	69373707	-1	B3	ENSMUSG00000003934	FALSE	(ENSMUSG00000003934 ~ A_neuron_reference) BIC = -12.03;(ENSMUSG00000003934 ~ 1) BIC = -10.57;(ENSMUSG00000003934 ~ A_oligodendrocyte_reference) BIC = -10.35	3	TRUE	A_neuron_reference = 2.1239;A_oligodendrocyte_reference = 1.6944	NA	0.0336756	0.0901978	NA	NA
Mmd	monocyte to macrophage differentiation-associated	11	90048998	90139903	1	C	ENSMUSG00000003948	FALSE	(ENSMUSG00000003948 ~ A_astrocyte_reference + A_microglia_reference + A_neuron_reference + A_oligodendrocyte_reference) BIC = -51.46;(ENSMUSG00000003948 ~ A_microglia_reference + A_neuron_reference + A_oligodendrocyte_reference) BIC = -50.32	2	TRUE	A_astrocyte_reference = 1.9244;A_microglia_reference = 2.6084;A_neuron_reference = 3.0305;A_oligodendrocyte_reference = 3.2716	0.054307	0.00244173	0.00106949	0.0090977	NA
Hlf	hepatic leukemia factor	11	90197849	90252231	-1	D	ENSMUSG00000003949	FALSE	(ENSMUSG00000003949 ~ A_microglia_reference) BIC = -9.15;(ENSMUSG00000003949 ~ 1) BIC = -7.85;(ENSMUSG00000003949 ~ A_astrocyte_reference) BIC = -7.79;(ENSMUSG00000003949 ~ A_endothelial_reference + A_microglia_reference) BIC = -7.75	4	TRUE	A_microglia_reference = 2.1547;A_astrocyte_reference = 1.738;A_endothelial_reference = 1.3032	0.0822091	NA	NA	0.0311829	0.19252
Fam162a	family with sequence similarity 162, member A	16	36043930	36071601	-1	B3	ENSMUSG00000003955	FALSE	(ENSMUSG00000003955 ~ A_neuron_reference + A_oligodendrocyte_reference) BIC = -40.22;(ENSMUSG00000003955 ~ A_endothelial_reference + A_microglia_reference + A_neuron_reference + A_oligodendrocyte_reference) BIC = -39.54;(ENSMUSG00000003955 ~ A_microglia_reference + A_neuron_reference + A_oligodendrocyte_reference) BIC = -39.45;(ENSMUSG00000003955 ~ A_endothelial_reference + A_neuron_reference + A…	4	TRUE	A_neuron_reference = 3.1655;A_oligodendrocyte_reference = 3.0686;A_endothelial_reference = 1.4852;A_microglia_reference = 1.6291	NA	0.00154826	0.00215044	0.103292	0.137493
Rpl8	ribosomal protein L8	15	76734501	76736748	1	D3	ENSMUSG00000003970	FALSE	(ENSMUSG00000003970 ~ A_neuron_reference + A_oligodendrocyte_reference) BIC = -45.97;(ENSMUSG00000003970 ~ A_endothelial_reference + A_neuron_reference + A_oligodendrocyte_reference) BIC = -45.3	2	TRUE	A_neuron_reference = 3.6946;A_oligodendrocyte_reference = 3.2711;A_endothelial_reference = 1.5016	NA	0.00022019	0.00107136	NA	0.133213
Grm3	glutamate receptor, metabotropic 3	5	9485236	9725352	-1	A1	ENSMUSG00000003974	FALSE	(ENSMUSG00000003974 ~ A_astrocyte_reference) BIC = -3.71;(ENSMUSG00000003974 ~ A_neuron_reference) BIC = -3.59;(ENSMUSG00000003974 ~ A_astrocyte_reference + A_neuron_reference) BIC = -2.88;(ENSMUSG00000003974 ~ A_microglia_reference + A_neuron_reference) BIC = -2.8;(ENSMUSG00000003974 ~ A_astrocyte_reference + A_oligodendrocyte_reference) BIC = -2.53	5	TRUE	A_astrocyte_reference = 2.1866;A_neuron_reference = 2.2383;A_microglia_reference = 1.4961;A_oligodendrocyte_reference = 1.3733	0.0287692	0.0252006	0.169662	0.134619	NA
Ssbp2	single-stranded DNA binding protein 2	13	91599888	91843034	1	C3	ENSMUSG00000003992	FALSE	(ENSMUSG00000003992 ~ A_endothelial_reference + A_microglia_reference + A_neuron_reference) BIC = -65.44	1	FALSE	NA	NA	0.00719247	NA	0.231801	0.00912748
Fancl	Fanconi anemia, complementation group L	11	26286135	26371876	1	A3.3	ENSMUSG00000004018	FALSE	(ENSMUSG00000004018 ~ A_microglia_reference) BIC = -39.08;(ENSMUSG00000004018 ~ A_microglia_reference + A_oligodendrocyte_reference) BIC = -37.64	2	TRUE	A_microglia_reference = 3.0069;A_oligodendrocyte_reference = 1.289	NA	NA	0.1974	0.00263931	NA
Fam5b	family with sequence similarity 5, member B	1	160175402	160286391	-1	H1	ENSMUSG00000004031	FALSE	(ENSMUSG00000004031 ~ A_endothelial_reference + A_neuron_reference + A_oligodendrocyte_reference) BIC = -40.85;(ENSMUSG00000004031 ~ A_neuron_reference) BIC = -40;(ENSMUSG00000004031 ~ A_neuron_reference + A_oligodendrocyte_reference) BIC = -39.25;(ENSMUSG00000004031 ~ A_endothelial_reference + A_microglia_reference + A_neuron_reference + A_oligodendrocyte_reference) BIC = -38.88	4	TRUE	A_endothelial_reference = 1.9959;A_neuron_reference = 4.9036;A_oligodendrocyte_reference = 1.9967;A_microglia_reference = 1.0522	NA	9.4e-07	0.0458535	0.292714	0.0459401
Gstm5	glutathione S-transferase, mu 5	3	107698739	107701604	1	F2.3	ENSMUSG00000004032	FALSE	(ENSMUSG00000004032 ~ A_endothelial_reference + A_neuron_reference + A_oligodendrocyte_reference) BIC = -37.44;(ENSMUSG00000004032 ~ A_neuron_reference + A_oligodendrocyte_reference) BIC = -36.66;(ENSMUSG00000004032 ~ A_endothelial_reference + A_neuron_reference) BIC = -36.04	3	TRUE	A_endothelial_reference = 2.0245;A_neuron_reference = 2.2102;A_oligodendrocyte_reference = 2.2129	NA	0.0270946	0.0269076	NA	0.042916
Gstm7	glutathione S-transferase, mu 7	3	107729252	107734735	-1	F2.3	ENSMUSG00000004035	FALSE	(ENSMUSG00000004035 ~ A_endothelial_reference + A_microglia_reference) BIC = -28.09;(ENSMUSG00000004035 ~ A_microglia_reference) BIC = -26.46	2	TRUE	A_endothelial_reference = 2.1207;A_microglia_reference = 2.6785	NA	NA	NA	0.0073954	0.0339442
Stat3	signal transducer and activator of transcription 3	11	100746412	100800854	-1	D	ENSMUSG00000004040	FALSE	(ENSMUSG00000004040 ~ A_oligodendrocyte_reference) BIC = -67.59;(ENSMUSG00000004040 ~ A_microglia_reference) BIC = -66.29;(ENSMUSG00000004040 ~ A_microglia_reference + A_oligodendrocyte_reference) BIC = -66.07	3	TRUE	A_oligodendrocyte_reference = 2.2385;A_microglia_reference = 1.6835	NA	NA	0.0251852	0.0922828	NA
Stat5a	signal transducer and activator of transcription 5A	11	100720665	100746483	1	D	ENSMUSG00000004043	FALSE	(ENSMUSG00000004043 ~ A_neuron_reference) BIC = 9.39;(ENSMUSG00000004043 ~ A_neuron_reference + A_oligodendrocyte_reference) BIC = 10.79	2	TRUE	A_neuron_reference = 3.7709;A_oligodendrocyte_reference = 1.3027	NA	0.00016268	0.192664	NA	NA
Ptrf	polymerase I and transcript release factor	11	100818047	100832201	-1	D	ENSMUSG00000004044	FALSE	(ENSMUSG00000004044 ~ A_endothelial_reference + A_microglia_reference) BIC = 2.69;(ENSMUSG00000004044 ~ A_endothelial_reference + A_microglia_reference + A_oligodendrocyte_reference) BIC = 3.77;(ENSMUSG00000004044 ~ A_endothelial_reference + A_microglia_reference + A_neuron_reference) BIC = 3.96	3	TRUE	A_endothelial_reference = 2.7164;A_microglia_reference = 4.7744;A_oligodendrocyte_reference = 1.3787;A_neuron_reference = 1.3185	NA	0.187343	0.167993	1.8e-06	0.00659964
Map3k11	mitogen-activated protein kinase kinase kinase 11	19	5689131	5702862	1	A	ENSMUSG00000004054	FALSE	(ENSMUSG00000004054 ~ A_endothelial_reference + A_neuron_reference) BIC = -47.47	1	FALSE	NA	NA	4.79297e-06	NA	NA	9.80792e-06
Akt2	thymoma viral proto-oncogene 2	7	28376571	28425845	1	A3	ENSMUSG00000004056	FALSE	(ENSMUSG00000004056 ~ A_endothelial_reference + A_microglia_reference) BIC = -21.1;(ENSMUSG00000004056 ~ A_astrocyte_reference + A_endothelial_reference + A_microglia_reference) BIC = -20.63;(ENSMUSG00000004056 ~ A_astrocyte_reference + A_endothelial_reference) BIC = -19.59;(ENSMUSG00000004056 ~ A_endothelial_reference + A_microglia_reference + A_neuron_reference) BIC = -19.33	4	TRUE	A_endothelial_reference = 2.9426;A_microglia_reference = 2.5484;A_astrocyte_reference = 1.8298;A_neuron_reference = 1.1494	0.0672739	0.250401	NA	0.0108209	0.00325482
Dnaja3	DnaJ (Hsp40) homolog, subfamily A, member 3	16	4639989	4707695	1	A1	ENSMUSG00000004069	FALSE	(ENSMUSG00000004069 ~ 1) BIC = -91.94;(ENSMUSG00000004069 ~ A_astrocyte_reference) BIC = -91.9;(ENSMUSG00000004069 ~ A_microglia_reference) BIC = -91.6;(ENSMUSG00000004069 ~ A_neuron_reference) BIC = -91.47	4	TRUE	A_astrocyte_reference = 1.7414;A_microglia_reference = 1.6589;A_neuron_reference = 1.6214	0.0816158	0.104937	NA	0.0971421	NA
Hmox2	heme oxygenase (decycling) 2	16	4726361	4766742	1	A1	ENSMUSG00000004070	FALSE	(ENSMUSG00000004070 ~ A_neuron_reference + A_oligodendrocyte_reference) BIC = -65.93	1	FALSE	NA	NA	0.00742853	0.00753789	NA	NA
5730403B10Rik	RIKEN cDNA 5730403B10 gene	16	4750348	4790292	-1	A1	ENSMUSG00000004071	FALSE	(ENSMUSG00000004071 ~ 1) BIC = -79.91;(ENSMUSG00000004071 ~ A_microglia_reference) BIC = -78.46;(ENSMUSG00000004071 ~ A_neuron_reference + A_oligodendrocyte_reference) BIC = -78.02	3	TRUE	A_microglia_reference = 1.312;A_neuron_reference = 1.8578;A_oligodendrocyte_reference = 2.0491	NA	0.0631921	0.0404478	0.189525	NA
B230120H23Rik	RIKEN cDNA B230120H23 gene	2	72123694	72280667	1	C3	ENSMUSG00000004085	FALSE	(ENSMUSG00000004085 ~ A_neuron_reference) BIC = -29.72	1	FALSE	NA	NA	0.000470123	NA	NA	NA
Cwc15	CWC15 homolog (S. cerevisiae)	9	14305061	14315021	1	A1	ENSMUSG00000004096	FALSE	(ENSMUSG00000004096 ~ A_neuron_reference + A_oligodendrocyte_reference) BIC = -56.84;(ENSMUSG00000004096 ~ A_neuron_reference) BIC = -56.08	2	TRUE	A_neuron_reference = 2.3821;A_oligodendrocyte_reference = 1.9153	NA	0.0172149	0.0554592	NA	NA
Col5a3	collagen, type V, alpha 3	9	20574494	20619511	-1	A3	ENSMUSG00000004098	FALSE	(ENSMUSG00000004098 ~ A_neuron_reference) BIC = -5.79;(ENSMUSG00000004098 ~ A_microglia_reference + A_neuron_reference) BIC = -4.73	2	TRUE	A_neuron_reference = 4.1241;A_microglia_reference = 1.4136	NA	3.721e-05	NA	0.157478	NA
Dnmt1	DNA methyltransferase (cytosine-5) 1	9	20711650	20757317	-1	A3	ENSMUSG00000004099	FALSE	(ENSMUSG00000004099 ~ A_endothelial_reference + A_microglia_reference) BIC = -43.39	1	FALSE	NA	NA	NA	NA	0.00815706	0.0901511
Ppan	peter pan homolog (Drosophila)	9	20692619	20696622	1	A3	ENSMUSG00000004100	FALSE	(ENSMUSG00000004100 ~ A_microglia_reference + A_oligodendrocyte_reference) BIC = -48.61;(ENSMUSG00000004100 ~ A_microglia_reference + A_neuron_reference + A_oligodendrocyte_reference) BIC = -47.35	2	TRUE	A_microglia_reference = 3.387;A_oligodendrocyte_reference = 3.1216;A_neuron_reference = 1.324	NA	0.185488	0.00179891	0.00070663	NA
Angptl2	angiopoietin-like 2	2	33071589	33103237	1	B	ENSMUSG00000004105	FALSE	(ENSMUSG00000004105 ~ A_microglia_reference) BIC = 55;(ENSMUSG00000004105 ~ A_oligodendrocyte_reference) BIC = 55.38;(ENSMUSG00000004105 ~ A_microglia_reference + A_oligodendrocyte_reference) BIC = 55.39;(ENSMUSG00000004105 ~ A_endothelial_reference + A_microglia_reference + A_oligodendrocyte_reference) BIC = 56.61	4	TRUE	A_microglia_reference = 2.083;A_oligodendrocyte_reference = 1.9404;A_endothelial_reference = 1.3339	NA	NA	0.0523309	0.0372497	0.182224
Cacna1e	calcium channel, voltage-dependent, R type, alpha 1E subunit	1	156239649	156573049	-1	G3	ENSMUSG00000004110	FALSE	(ENSMUSG00000004110 ~ A_endothelial_reference + A_neuron_reference + A_oligodendrocyte_reference) BIC = -0.46	1	FALSE	NA	NA	0.0284934	0.0315201	NA	0.000832081
Cacna1b	calcium channel, voltage-dependent, N type, alpha 1B subunit	2	24459407	24618672	-1	A3	ENSMUSG00000004113	FALSE	(ENSMUSG00000004113 ~ A_endothelial_reference + A_microglia_reference + A_neuron_reference) BIC = -43.92;(ENSMUSG00000004113 ~ A_endothelial_reference + A_microglia_reference + A_neuron_reference + A_oligodendrocyte_reference) BIC = -42.91;(ENSMUSG00000004113 ~ A_endothelial_reference + A_microglia_reference) BIC = -42.9;(ENSMUSG00000004113 ~ A_astrocyte_reference + A_endothelial_reference + A_mi…	4	TRUE	A_endothelial_reference = 3.4887;A_microglia_reference = 2.8939;A_neuron_reference = 1.8159;A_oligodendrocyte_reference = 1.3699;A_astrocyte_reference = 1.667	0.0955074	0.0693842	0.170722	0.00380528	0.00048546
Rg9mtd2	RNA (guanine-9-) methyltransferase domain containing 2	3	137806412	137822785	1	G3	ENSMUSG00000004127	FALSE	(ENSMUSG00000004127 ~ A_neuron_reference) BIC = -51.06;(ENSMUSG00000004127 ~ A_endothelial_reference + A_neuron_reference) BIC = -50.29	2	TRUE	A_neuron_reference = 5.0966;A_endothelial_reference = 1.504	NA	3.5e-07	NA	NA	0.132583
Etv1	ets variant gene 1	12	39505967	39594802	1	A3	ENSMUSG00000004151	FALSE	(ENSMUSG00000004151 ~ A_neuron_reference) BIC = -17.52;(ENSMUSG00000004151 ~ A_astrocyte_reference + A_neuron_reference + A_oligodendrocyte_reference) BIC = -16.78;(ENSMUSG00000004151 ~ A_neuron_reference + A_oligodendrocyte_reference) BIC = -16.75;(ENSMUSG00000004151 ~ A_astrocyte_reference + A_neuron_reference) BIC = -16.5;(ENSMUSG00000004151 ~ A_astrocyte_reference) BIC = -16.21;(ENSMUSG000000…	6	TRUE	A_neuron_reference = 2.4177;A_astrocyte_reference = 1.9374;A_oligodendrocyte_reference = 1.6197;A_endothelial_reference = 1.6674	0.0526916	0.0156188	0.105305	NA	0.0954305
Kifc2	kinesin family member C2	15	76490996	76498625	1	D3	ENSMUSG00000004187	FALSE	(ENSMUSG00000004187 ~ A_astrocyte_reference + A_endothelial_reference + A_oligodendrocyte_reference) BIC = -59.77	1	FALSE	NA	5.11625e-08	NA	0.0184172	NA	0.00679606
Psap	prosaposin	10	59740375	59765345	1	B4	ENSMUSG00000004207	FALSE	(ENSMUSG00000004207 ~ A_microglia_reference + A_oligodendrocyte_reference) BIC = -56.31;(ENSMUSG00000004207 ~ A_oligodendrocyte_reference) BIC = -55.19	2	TRUE	A_microglia_reference = 2.0002;A_oligodendrocyte_reference = 3.0486	NA	NA	0.00229937	0.045483	NA
Ikbkg	inhibitor of kappaB kinase gamma	X	71638629	71699193	1	A7.3	ENSMUSG00000004221	FALSE	(ENSMUSG00000004221 ~ A_endothelial_reference + A_neuron_reference) BIC = -80.2	1	FALSE	NA	NA	0.000550871	NA	NA	1.3847e-05
Wars2	tryptophanyl tRNA synthetase 2 (mitochondrial)	3	98944991	99043109	1	F2.2	ENSMUSG00000004233	FALSE	(ENSMUSG00000004233 ~ A_endothelial_reference + A_neuron_reference) BIC = -31.82	1	FALSE	NA	NA	0.00257516	NA	NA	0.00110703
Atn1	atrophin 1	6	124689207	124706542	-1	F2	ENSMUSG00000004263	FALSE	(ENSMUSG00000004263 ~ A_neuron_reference) BIC = -32.92;(ENSMUSG00000004263 ~ A_microglia_reference + A_neuron_reference) BIC = -32.87;(ENSMUSG00000004263 ~ A_microglia_reference) BIC = -32.24	3	TRUE	A_neuron_reference = 2.2316;A_microglia_reference = 1.9751	NA	0.0256424	NA	0.0482601	NA
Phb2	prohibitin 2	6	124662340	124666968	1	F2	ENSMUSG00000004264	FALSE	(ENSMUSG00000004264 ~ A_endothelial_reference + A_oligodendrocyte_reference) BIC = -58.49;(ENSMUSG00000004264 ~ A_endothelial_reference + A_neuron_reference + A_oligodendrocyte_reference) BIC = -56.69	2	TRUE	A_endothelial_reference = 2.6865;A_oligodendrocyte_reference = 2.0874;A_neuron_reference = 1.1404	NA	0.254103	0.0368482	NA	0.00722073
Ptpn6	protein tyrosine phosphatase, non-receptor type 6	6	124670725	124688732	-1	F2	ENSMUSG00000004266	FALSE	(ENSMUSG00000004266 ~ 1) BIC = -6.36;(ENSMUSG00000004266 ~ A_astrocyte_reference) BIC = -5.15	2	TRUE	A_astrocyte_reference = 1.3955	0.162874	NA	NA	NA	NA
Eno2	enolase 2, gamma neuronal	6	124710071	124719691	-1	F2	ENSMUSG00000004267	FALSE	(ENSMUSG00000004267 ~ A_endothelial_reference + A_microglia_reference + A_neuron_reference) BIC = -71.54;(ENSMUSG00000004267 ~ A_microglia_reference + A_neuron_reference) BIC = -69.88	2	TRUE	A_endothelial_reference = 2.0849;A_microglia_reference = 2.7176;A_neuron_reference = 4.6379	NA	3.52e-06	NA	0.0065757	0.0370745
Emg1	EMG1 nucleolar protein homolog (S. cerevisiae)	6	124654399	124662196	-1	F2	ENSMUSG00000004268	FALSE	(ENSMUSG00000004268 ~ A_neuron_reference + A_oligodendrocyte_reference) BIC = -52.64	1	FALSE	NA	NA	0.0513845	0.010568	NA	NA
Lpcat3	lysophosphatidylcholine acyltransferase 3	6	124613045	124654436	1	F2	ENSMUSG00000004270	FALSE	(ENSMUSG00000004270 ~ A_astrocyte_reference + A_endothelial_reference + A_microglia_reference) BIC = -74.23;(ENSMUSG00000004270 ~ A_astrocyte_reference + A_microglia_reference) BIC = -73.03	2	TRUE	A_astrocyte_reference = 2.2246;A_endothelial_reference = 1.9802;A_microglia_reference = 2.8844	0.0261075	NA	NA	0.00392164	0.0476781
Atp6v1f	ATPase, H+ transporting, lysosomal V1 subunit F	6	29417718	29420512	1	A3.3	ENSMUSG00000004285	FALSE	(ENSMUSG00000004285 ~ A_neuron_reference + A_oligodendrocyte_reference) BIC = -47.72	1	FALSE	NA	NA	0.637242	8.64162e-06	NA	NA
Clcn5	chloride channel 5	X	6730936	6896484	-1	A1.1	ENSMUSG00000004317	FALSE	(ENSMUSG00000004317 ~ A_astrocyte_reference + A_microglia_reference + A_oligodendrocyte_reference) BIC = -28.57;(ENSMUSG00000004317 ~ A_astrocyte_reference + A_microglia_reference + A_neuron_reference + A_oligodendrocyte_reference) BIC = -27.02	2	TRUE	A_astrocyte_reference = 2.4068;A_microglia_reference = 3.0934;A_oligodendrocyte_reference = 5.077;A_neuron_reference = 1.1987	0.0160928	0.230654	3.8e-07	0.0019788	NA
Clcn3	chloride channel 3	8	63389186	63462097	-1	B3.1	ENSMUSG00000004319	FALSE	(ENSMUSG00000004319 ~ A_oligodendrocyte_reference) BIC = -84.69;(ENSMUSG00000004319 ~ A_endothelial_reference + A_oligodendrocyte_reference) BIC = -84.65;(ENSMUSG00000004319 ~ A_microglia_reference + A_oligodendrocyte_reference) BIC = -83.19;(ENSMUSG00000004319 ~ A_endothelial_reference + A_microglia_reference + A_oligodendrocyte_reference) BIC = -82.75	4	TRUE	A_oligodendrocyte_reference = 3.8558;A_endothelial_reference = 1.6646;A_microglia_reference = 1.1906	NA	NA	0.00011535	0.233798	0.0959879
Hif3a	hypoxia inducible factor 3, alpha subunit	7	17616856	17647776	-1	A2	ENSMUSG00000004328	FALSE	(ENSMUSG00000004328 ~ A_endothelial_reference) BIC = 49.14;(ENSMUSG00000004328 ~ A_endothelial_reference + A_microglia_reference) BIC = 50.8	2	TRUE	A_endothelial_reference = 3.9535;A_microglia_reference = 1.2148	NA	NA	NA	0.224424	7.702e-05
Pde1c	phosphodiesterase 1C	6	56019815	56319628	-1	B3	ENSMUSG00000004347	FALSE	(ENSMUSG00000004347 ~ A_neuron_reference + A_oligodendrocyte_reference) BIC = 21.27	1	FALSE	NA	NA	4.15058e-10	0.0166957	NA	NA
Utp20	UTP20, small subunit (SSU) processome component, homolog (yeast)	10	88209352	88289559	-1	C1	ENSMUSG00000004356	FALSE	(ENSMUSG00000004356 ~ A_endothelial_reference + A_microglia_reference + A_neuron_reference + A_oligodendrocyte_reference) BIC = -54.44;(ENSMUSG00000004356 ~ A_endothelial_reference + A_microglia_reference) BIC = -53.25	2	TRUE	A_endothelial_reference = 2.59;A_microglia_reference = 3.0339;A_neuron_reference = 2.553;A_oligodendrocyte_reference = 2.2776	NA	0.0106804	0.0227517	0.00241447	0.00959859
9330159F19Rik	RIKEN cDNA 9330159F19 gene	10	28931449	28950585	1	A4	ENSMUSG00000004360	FALSE	(ENSMUSG00000004360 ~ A_endothelial_reference + A_microglia_reference + A_oligodendrocyte_reference) BIC = -54.24;(ENSMUSG00000004360 ~ A_endothelial_reference) BIC = -54.03;(ENSMUSG00000004360 ~ A_endothelial_reference + A_oligodendrocyte_reference) BIC = -53.72;(ENSMUSG00000004360 ~ A_oligodendrocyte_reference) BIC = -53.07;(ENSMUSG00000004360 ~ A_neuron_reference + A_oligodendrocyte_reference)…	5	TRUE	A_endothelial_reference = 2.1022;A_microglia_reference = 1.8146;A_oligodendrocyte_reference = 1.7955;A_neuron_reference = 1.506	NA	0.132074	0.0725686	0.0695885	0.0355359
Cul3	cullin 3	1	80261498	80337055	-1	C4	ENSMUSG00000004364	FALSE	(ENSMUSG00000004364 ~ A_oligodendrocyte_reference) BIC = -96.45;(ENSMUSG00000004364 ~ A_microglia_reference + A_oligodendrocyte_reference) BIC = -94.7	2	TRUE	A_oligodendrocyte_reference = 4.5581;A_microglia_reference = 1.1805	NA	NA	5.16e-06	0.237803	NA
Sst	somatostatin	16	23889667	23890930	-1	B1	ENSMUSG00000004366	FALSE	(ENSMUSG00000004366 ~ A_neuron_reference + A_oligodendrocyte_reference) BIC = -34.47;(ENSMUSG00000004366 ~ A_oligodendrocyte_reference) BIC = -34.13	2	TRUE	A_neuron_reference = 1.8083;A_oligodendrocyte_reference = 3.2543	NA	0.0705668	0.00113658	NA	NA
Large	like-glycosyltransferase	8	75338498	75877439	-1	B3.3	ENSMUSG00000004383	FALSE	(ENSMUSG00000004383 ~ A_endothelial_reference + A_microglia_reference + A_neuron_reference + A_oligodendrocyte_reference) BIC = -62.74;(ENSMUSG00000004383 ~ A_endothelial_reference + A_neuron_reference + A_oligodendrocyte_reference) BIC = -61.32;(ENSMUSG00000004383 ~ A_endothelial_reference + A_neuron_reference) BIC = -61.04	3	TRUE	A_endothelial_reference = 2.5034;A_microglia_reference = 1.9859;A_neuron_reference = 5.2171;A_oligodendrocyte_reference = 2.0259	NA	1.8e-07	0.042772	0.0470408	0.0123006
Ddx56	DEAD (Asp-Glu-Ala-Asp) box polypeptide 56	11	6158922	6167775	-1	A1	ENSMUSG00000004393	FALSE	(ENSMUSG00000004393 ~ A_oligodendrocyte_reference) BIC = -58.57;(ENSMUSG00000004393 ~ A_microglia_reference) BIC = -57.99;(ENSMUSG00000004393 ~ A_microglia_reference + A_oligodendrocyte_reference) BIC = -57.25	3	TRUE	A_oligodendrocyte_reference = 2.0627;A_microglia_reference = 1.816	NA	NA	0.039139	0.0693672	NA
Tmed4	transmembrane emp24 protein transport domain containing 4	11	6170372	6174873	-1	A1	ENSMUSG00000004394	FALSE	(ENSMUSG00000004394 ~ A_oligodendrocyte_reference) BIC = -73.72	1	FALSE	NA	NA	NA	0.00517786	NA	NA
Emid2	EMI domain containing 2	5	137217629	137359079	-1	G2	ENSMUSG00000004415	FALSE	(ENSMUSG00000004415 ~ A_astrocyte_reference) BIC = -18.77	1	FALSE	NA	0.00104461	NA	NA	NA	NA
Bid	BH3 interacting domain death agonist	6	120841948	120866871	-1	F1	ENSMUSG00000004446	FALSE	(ENSMUSG00000004446 ~ A_neuron_reference) BIC = -30.35;(ENSMUSG00000004446 ~ A_microglia_reference + A_neuron_reference) BIC = -30.04;(ENSMUSG00000004446 ~ A_astrocyte_reference) BIC = -28.86;(ENSMUSG00000004446 ~ A_astrocyte_reference + A_oligodendrocyte_reference) BIC = -28.73;(ENSMUSG00000004446 ~ A_astrocyte_reference + A_neuron_reference) BIC = -28.66;(ENSMUSG00000004446 ~ A_oligodendrocyte_…	6	TRUE	A_neuron_reference = 2.5038;A_microglia_reference = 1.6333;A_astrocyte_reference = 1.7456;A_oligodendrocyte_reference = 2.0483	0.0808823	0.0122869	0.0405343	0.102399	NA
Ralb	v-ral simian leukemia viral oncogene homolog B (ras related)	1	121366882	121401371	-1	E2.3	ENSMUSG00000004451	FALSE	(ENSMUSG00000004451 ~ A_neuron_reference) BIC = -38.2;(ENSMUSG00000004451 ~ A_astrocyte_reference + A_endothelial_reference) BIC = -37.21;(ENSMUSG00000004451 ~ A_astrocyte_reference + A_endothelial_reference + A_oligodendrocyte_reference) BIC = -36.94;(ENSMUSG00000004451 ~ A_endothelial_reference + A_microglia_reference + A_neuron_reference) BIC = -36.9;(ENSMUSG00000004451 ~ A_endothelial_referen…	8	TRUE	A_neuron_reference = 2.4309;A_astrocyte_reference = 1.8351;A_endothelial_reference = 1.7479;A_oligodendrocyte_reference = 1.6131;A_microglia_reference = 1.4365	0.0664953	0.0150633	0.106733	0.150867	0.0804761
Ppp1cc	protein phosphatase 1, catalytic subunit, gamma isoform	5	122608287	122625282	1	F	ENSMUSG00000004455	FALSE	(ENSMUSG00000004455 ~ A_neuron_reference) BIC = -15.81;(ENSMUSG00000004455 ~ A_endothelial_reference + A_neuron_reference + A_oligodendrocyte_reference) BIC = -15.06;(ENSMUSG00000004455 ~ A_endothelial_reference + A_neuron_reference) BIC = -14.84;(ENSMUSG00000004455 ~ A_astrocyte_reference + A_endothelial_reference + A_neuron_reference + A_oligodendrocyte_reference) BIC = -14.36;(ENSMUSG000000044…	6	TRUE	A_neuron_reference = 2.956;A_endothelial_reference = 1.836;A_oligodendrocyte_reference = 1.9019;A_astrocyte_reference = 1.6575	0.0974268	0.00311621	0.0571904	NA	0.066357
Dnajb11	DnaJ (Hsp40) homolog, subfamily B, member 11	16	22857918	22879707	1	B1	ENSMUSG00000004460	FALSE	(ENSMUSG00000004460 ~ A_astrocyte_reference + A_microglia_reference + A_neuron_reference) BIC = -53.6;(ENSMUSG00000004460 ~ A_astrocyte_reference + A_endothelial_reference + A_microglia_reference + A_neuron_reference) BIC = -52.37;(ENSMUSG00000004460 ~ A_astrocyte_reference + A_neuron_reference) BIC = -51.87	3	TRUE	A_astrocyte_reference = 2.4412;A_microglia_reference = 2.0112;A_neuron_reference = 3.0303;A_endothelial_reference = 1.3014	0.0146385	0.00244273	NA	0.0443003	0.193112
Tbccd1	TBCC domain containing 1	16	22813288	22857642	-1	B1	ENSMUSG00000004462	FALSE	(ENSMUSG00000004462 ~ A_endothelial_reference + A_microglia_reference + A_oligodendrocyte_reference) BIC = -60.84;(ENSMUSG00000004462 ~ A_microglia_reference + A_neuron_reference) BIC = -60.47;(ENSMUSG00000004462 ~ A_microglia_reference + A_oligodendrocyte_reference) BIC = -60.33;(ENSMUSG00000004462 ~ A_microglia_reference + A_neuron_reference + A_oligodendrocyte_reference) BIC = -59.66	4	TRUE	A_endothelial_reference = 1.8152;A_microglia_reference = 2.6782;A_oligodendrocyte_reference = 2.465;A_neuron_reference = 2.1283	NA	0.0333131	0.0137	0.00740174	0.0694857
Clec11a	C-type lectin domain family 11, member a	7	51559140	51562329	-1	B4	ENSMUSG00000004473	FALSE	(ENSMUSG00000004473 ~ A_astrocyte_reference + A_oligodendrocyte_reference) BIC = -8.86;(ENSMUSG00000004473 ~ A_astrocyte_reference + A_endothelial_reference + A_oligodendrocyte_reference) BIC = -8.65;(ENSMUSG00000004473 ~ A_astrocyte_reference + A_neuron_reference + A_oligodendrocyte_reference) BIC = -8.5;(ENSMUSG00000004473 ~ A_neuron_reference + A_oligodendrocyte_reference) BIC = -6.95	4	TRUE	A_astrocyte_reference = 2.6826;A_oligodendrocyte_reference = 2.8217;A_endothelial_reference = 1.6276;A_neuron_reference = 1.764	0.00730458	0.0777383	0.00477641	NA	0.103618
Zfp324	zinc finger protein 324	7	13551187	13559585	1	A1	ENSMUSG00000004500	FALSE	(ENSMUSG00000004500 ~ A_endothelial_reference + A_neuron_reference) BIC = -32.82;(ENSMUSG00000004500 ~ A_astrocyte_reference + A_endothelial_reference + A_neuron_reference) BIC = -31.86;(ENSMUSG00000004500 ~ A_astrocyte_reference + A_neuron_reference) BIC = -31.07;(ENSMUSG00000004500 ~ A_endothelial_reference + A_oligodendrocyte_reference) BIC = -31.02	4	TRUE	A_endothelial_reference = 2.1339;A_neuron_reference = 2.4325;A_astrocyte_reference = 1.5597;A_oligodendrocyte_reference = 2.6055	0.118832	0.014996	0.00917536	NA	0.032855
Gab2	growth factor receptor bound protein 2-associated protein 2	7	104230261	104457450	1	E1	ENSMUSG00000004508	FALSE	(ENSMUSG00000004508 ~ A_oligodendrocyte_reference) BIC = -60.24;(ENSMUSG00000004508 ~ A_endothelial_reference + A_oligodendrocyte_reference) BIC = -58.71	2	TRUE	A_oligodendrocyte_reference = 5.4576;A_endothelial_reference = 1.2571	NA	NA	5e-08	NA	0.208723
Coro1c	coronin, actin binding protein 1C	5	114292445	114358767	-1	F	ENSMUSG00000004530	FALSE	(ENSMUSG00000004530 ~ 1) BIC = -72.79;(ENSMUSG00000004530 ~ A_neuron_reference) BIC = -72.34;(ENSMUSG00000004530 ~ A_astrocyte_reference) BIC = -70.92	3	TRUE	A_neuron_reference = 1.6272;A_astrocyte_reference = 1.1583	0.246756	0.103702	NA	NA	NA
Tax1bp1	Tax1 (human T cell leukemia virus type I) binding protein 1	6	52663723	52716774	1	B3	ENSMUSG00000004535	FALSE	(ENSMUSG00000004535 ~ A_microglia_reference + A_neuron_reference) BIC = -80.77	1	FALSE	NA	NA	0.000307659	NA	1.58997e-06	NA
Ndrg2	N-myc downstream regulated gene 2	14	52524946	52533163	-1	C2	ENSMUSG00000004558	FALSE	(ENSMUSG00000004558 ~ A_neuron_reference) BIC = -47.46;(ENSMUSG00000004558 ~ A_endothelial_reference + A_neuron_reference) BIC = -46.97;(ENSMUSG00000004558 ~ A_astrocyte_reference + A_endothelial_reference + A_neuron_reference) BIC = -45.61;(ENSMUSG00000004558 ~ A_astrocyte_reference + A_endothelial_reference) BIC = -45.5	4	TRUE	A_neuron_reference = 3.0231;A_endothelial_reference = 1.7467;A_astrocyte_reference = 1.7857	0.0741454	0.00250199	NA	NA	0.0806923
Mettl17	methyltransferase like 17	14	52504517	52512714	1	C2	ENSMUSG00000004561	FALSE	(ENSMUSG00000004561 ~ A_microglia_reference) BIC = -26.53;(ENSMUSG00000004561 ~ A_microglia_reference + A_oligodendrocyte_reference) BIC = -24.97	2	TRUE	A_microglia_reference = 2.2476;A_oligodendrocyte_reference = 1.2467	NA	NA	0.212498	0.0245986	NA
Arhgef40	Rho guanine nucleotide exchange factor (GEF) 40	14	52604508	52625922	1	C2	ENSMUSG00000004562	FALSE	(ENSMUSG00000004562 ~ A_neuron_reference) BIC = -34.55;(ENSMUSG00000004562 ~ A_microglia_reference + A_neuron_reference) BIC = -34.45	2	TRUE	A_neuron_reference = 2.7303;A_microglia_reference = 1.6916	NA	0.00632741	NA	0.0907213	NA
Pnpla6	patatin-like phospholipase domain containing 6	8	3515384	3544266	1	A1.1	ENSMUSG00000004565	FALSE	(ENSMUSG00000004565 ~ A_microglia_reference + A_oligodendrocyte_reference) BIC = -42.95	1	FALSE	NA	NA	NA	0.0126049	0.0228808	NA
Mcoln1	mucolipin 1	8	3500457	3515232	1	A1.1	ENSMUSG00000004567	FALSE	(ENSMUSG00000004567 ~ A_endothelial_reference + A_microglia_reference + A_neuron_reference) BIC = -71.5;(ENSMUSG00000004567 ~ A_endothelial_reference + A_microglia_reference) BIC = -70.89	2	TRUE	A_endothelial_reference = 3.1152;A_microglia_reference = 3.018;A_neuron_reference = 1.8396	NA	0.0658327	NA	0.0025444	0.00183846
Arhgef18	rho/rac guanine nucleotide exchange factor (GEF) 18	8	3393006	3456601	1	A1.1	ENSMUSG00000004568	FALSE	(ENSMUSG00000004568 ~ A_astrocyte_reference + A_microglia_reference + A_oligodendrocyte_reference) BIC = -62.42	1	FALSE	NA	0.000256522	NA	0.00051171	0.0397217	NA
Pkn2	protein kinase N2	3	142453866	142544968	-1	H1	ENSMUSG00000004591	FALSE	(ENSMUSG00000004591 ~ A_oligodendrocyte_reference) BIC = -57.15;(ENSMUSG00000004591 ~ A_microglia_reference + A_oligodendrocyte_reference) BIC = -56.46;(ENSMUSG00000004591 ~ A_endothelial_reference + A_microglia_reference + A_oligodendrocyte_reference) BIC = -55.16	3	TRUE	A_oligodendrocyte_reference = 3.3335;A_microglia_reference = 1.5788;A_endothelial_reference = 1.3096	NA	NA	0.00085767	0.114375	0.190324
Cd33	CD33 antigen	7	50782826	50788541	-1	B4	ENSMUSG00000004609	FALSE	(ENSMUSG00000004609 ~ A_oligodendrocyte_reference) BIC = -25.13;(ENSMUSG00000004609 ~ 1) BIC = -24.72;(ENSMUSG00000004609 ~ A_microglia_reference + A_oligodendrocyte_reference) BIC = -23.17	3	TRUE	A_oligodendrocyte_reference = 1.8667;A_microglia_reference = 1.1019	NA	NA	0.061945	0.270511	NA
Etfb	electron transferring flavoprotein, beta polypeptide	7	50699478	50713170	1	B4	ENSMUSG00000004610	FALSE	(ENSMUSG00000004610 ~ A_astrocyte_reference + A_endothelial_reference + A_oligodendrocyte_reference) BIC = -37.61;(ENSMUSG00000004610 ~ A_endothelial_reference + A_microglia_reference + A_oligodendrocyte_reference) BIC = -37.56;(ENSMUSG00000004610 ~ A_astrocyte_reference + A_endothelial_reference + A_microglia_reference + A_oligodendrocyte_reference) BIC = -36.21;(ENSMUSG00000004610 ~ A_endotheli…	4	TRUE	A_astrocyte_reference = 1.7978;A_endothelial_reference = 2.3145;A_oligodendrocyte_reference = 2.6236;A_microglia_reference = 1.8222;A_neuron_reference = 1.2257	0.0722102	0.22031	0.00869968	0.0684195	0.0206391
Stxbp2	syntaxin binding protein 2	8	3630955	3643644	1	A1.1	ENSMUSG00000004626	FALSE	(ENSMUSG00000004626 ~ A_endothelial_reference) BIC = -18.41;(ENSMUSG00000004626 ~ A_endothelial_reference + A_microglia_reference + A_oligodendrocyte_reference) BIC = -16.81;(ENSMUSG00000004626 ~ A_endothelial_reference + A_oligodendrocyte_reference) BIC = -16.79	3	TRUE	A_endothelial_reference = 4.6111;A_microglia_reference = 1.6885;A_oligodendrocyte_reference = 1.4672	NA	NA	0.142312	0.0913229	4.01e-06
Pcp2	Purkinje cell protein 2 (L7)	8	3623371	3625545	-1	A1.1	ENSMUSG00000004630	FALSE	(ENSMUSG00000004630 ~ 1) BIC = 122.95	1	FALSE	NA	NA	NA	NA	NA	NA
Sgce	sarcoglycan, epsilon	6	4624350	4697204	-1	A1	ENSMUSG00000004631	FALSE	(ENSMUSG00000004631 ~ A_microglia_reference + A_neuron_reference) BIC = -64.27;(ENSMUSG00000004631 ~ A_neuron_reference) BIC = -64.07;(ENSMUSG00000004631 ~ A_endothelial_reference + A_neuron_reference) BIC = -63.24;(ENSMUSG00000004631 ~ A_astrocyte_reference + A_neuron_reference) BIC = -63.14;(ENSMUSG00000004631 ~ A_astrocyte_reference) BIC = -62.86	5	TRUE	A_microglia_reference = 1.7727;A_neuron_reference = 2.7545;A_endothelial_reference = 1.4826;A_astrocyte_reference = 1.8905	0.0586903	0.00587747	NA	0.0762836	0.138188
Chn2	chimerin (chimaerin) 2	6	53989548	54251804	1	B3	ENSMUSG00000004633	FALSE	(ENSMUSG00000004633 ~ A_endothelial_reference + A_neuron_reference + A_oligodendrocyte_reference) BIC = 0.21;(ENSMUSG00000004633 ~ A_astrocyte_reference + A_endothelial_reference + A_neuron_reference + A_oligodendrocyte_reference) BIC = 0.3;(ENSMUSG00000004633 ~ A_neuron_reference + A_oligodendrocyte_reference) BIC = 1.56	3	TRUE	A_endothelial_reference = 2.1667;A_neuron_reference = 3.9842;A_oligodendrocyte_reference = 2.4214;A_astrocyte_reference = 1.6267	0.10379	6.77e-05	0.0154608	NA	0.0302571
Wwox	WW domain-containing oxidoreductase	8	116963555	117876608	1	E1	ENSMUSG00000004637	FALSE	(ENSMUSG00000004637 ~ A_astrocyte_reference) BIC = -26.48	1	FALSE	NA	0.000284088	NA	NA	NA	NA
Slbp	stem-loop binding protein	5	33977601	33995223	-1	B2	ENSMUSG00000004642	FALSE	(ENSMUSG00000004642 ~ A_astrocyte_reference) BIC = -39.53;(ENSMUSG00000004642 ~ A_oligodendrocyte_reference) BIC = -39.51;(ENSMUSG00000004642 ~ 1) BIC = -38.83	3	TRUE	A_astrocyte_reference = 1.9376;A_oligodendrocyte_reference = 1.9331	0.0526732	NA	0.0532222	NA	NA
Aqp1	aquaporin 1	6	55286426	55298549	1	B3	ENSMUSG00000004655	FALSE	(ENSMUSG00000004655 ~ 1) BIC = 92.83;(ENSMUSG00000004655 ~ A_neuron_reference) BIC = 94.49	2	TRUE	A_neuron_reference = 1.2372	NA	0.216022	NA	NA	NA
Arid3b	AT rich interactive domain 3B (BRIGHT-like)	9	57638160	57684600	-1	B	ENSMUSG00000004661	FALSE	(ENSMUSG00000004661 ~ A_endothelial_reference + A_oligodendrocyte_reference) BIC = 7.6	1	FALSE	NA	NA	NA	9.09027e-06	NA	0.0915955
Cnn2	calponin 2	10	79451329	79458807	1	C1	ENSMUSG00000004665	FALSE	(ENSMUSG00000004665 ~ A_endothelial_reference + A_microglia_reference) BIC = -9.25	1	FALSE	NA	NA	NA	NA	3.86046e-07	0.370392
Polr2e	polymerase (RNA) II (DNA directed) polypeptide E	10	79498694	79502540	-1	C1	ENSMUSG00000004667	FALSE	(ENSMUSG00000004667 ~ A_oligodendrocyte_reference) BIC = -60.63	1	FALSE	NA	NA	NA	1.71085e-07	NA	NA
Myo9b	myosin IXb	8	73796613	73884611	1	B3.3	ENSMUSG00000004677	FALSE	(ENSMUSG00000004677 ~ 1) BIC = -29.06;(ENSMUSG00000004677 ~ A_microglia_reference + A_oligodendrocyte_reference) BIC = -27.75;(ENSMUSG00000004677 ~ A_oligodendrocyte_reference) BIC = -27.62	3	TRUE	A_microglia_reference = 1.7543;A_oligodendrocyte_reference = 1.5558	NA	NA	0.119751	0.0793853	NA
Hdac9	histone deacetylase 9	12	34732451	35213754	-1	A3	ENSMUSG00000004698	FALSE	(ENSMUSG00000004698 ~ A_endothelial_reference + A_neuron_reference) BIC = -40.58;(ENSMUSG00000004698 ~ A_astrocyte_reference + A_endothelial_reference) BIC = -39.56;(ENSMUSG00000004698 ~ A_astrocyte_reference + A_endothelial_reference + A_neuron_reference) BIC = -38.85	3	TRUE	A_endothelial_reference = 2.3821;A_neuron_reference = 2.4182;A_astrocyte_reference = 1.8433	0.0652851	0.0155976	NA	NA	0.0172143
Emr1	EGF-like module containing, mucin-like, hormone receptor-like sequence 1	17	57498109	57622952	1	D	ENSMUSG00000004730	FALSE	(ENSMUSG00000004730 ~ A_neuron_reference) BIC = -20.53;(ENSMUSG00000004730 ~ A_astrocyte_reference) BIC = -18.83	2	TRUE	A_neuron_reference = 3.587;A_astrocyte_reference = 3.278	0.00104549	0.000334497	NA	NA	NA
Mtfp1	mitochondrial fission process 1	11	3991483	3995448	-1	A1	ENSMUSG00000004748	FALSE	(ENSMUSG00000004748 ~ A_neuron_reference + A_oligodendrocyte_reference) BIC = -20.22;(ENSMUSG00000004748 ~ A_endothelial_reference + A_neuron_reference + A_oligodendrocyte_reference) BIC = -18.92	2	TRUE	A_neuron_reference = 3.8107;A_oligodendrocyte_reference = 2.3716;A_endothelial_reference = 1.3116	NA	0.00013856	0.0177094	NA	0.189646
Rab23	RAB23, member RAS oncogene family	1	33776727	33799409	1	B	ENSMUSG00000004768	FALSE	(ENSMUSG00000004768 ~ A_endothelial_reference + A_neuron_reference) BIC = -70.72	1	FALSE	NA	NA	7.60291e-05	NA	NA	0.00205669
Rab11a	RAB11a, member RAS oncogene family	9	64563106	64585565	-1	C	ENSMUSG00000004771	FALSE	(ENSMUSG00000004771 ~ 1) BIC = -78.53;(ENSMUSG00000004771 ~ A_endothelial_reference) BIC = -78.08;(ENSMUSG00000004771 ~ A_neuron_reference) BIC = -77.87;(ENSMUSG00000004771 ~ A_endothelial_reference + A_neuron_reference) BIC = -77.59;(ENSMUSG00000004771 ~ A_astrocyte_reference + A_endothelial_reference) BIC = -77.43;(ENSMUSG00000004771 ~ A_endothelial_reference + A_oligodendrocyte_reference) BIC …	7	TRUE	A_endothelial_reference = 1.749;A_neuron_reference = 1.5741;A_astrocyte_reference = 1.3779;A_oligodendrocyte_reference = 1.5385	0.168249	0.11547	0.123924	NA	0.0802872
Eif2b2	eukaryotic translation initiation factor 2B, subunit 2 beta	12	86560431	86567578	1	D2	ENSMUSG00000004788	FALSE	(ENSMUSG00000004788 ~ A_neuron_reference + A_oligodendrocyte_reference) BIC = -69.43;(ENSMUSG00000004788 ~ A_oligodendrocyte_reference) BIC = -68.39;(ENSMUSG00000004788 ~ A_astrocyte_reference + A_oligodendrocyte_reference) BIC = -67.5	3	TRUE	A_neuron_reference = 1.983;A_oligodendrocyte_reference = 2.9646;A_astrocyte_reference = 1.4652	0.142872	0.0473644	0.00303118	NA	NA
Dlst	dihydrolipoamide S-succinyltransferase (E2 component of 2-oxo-glutarate complex)	12	86451783	86475041	1	D2	ENSMUSG00000004789	FALSE	(ENSMUSG00000004789 ~ A_endothelial_reference + A_neuron_reference) BIC = -90.28;(ENSMUSG00000004789 ~ A_neuron_reference) BIC = -88.67	2	TRUE	A_endothelial_reference = 2.1181;A_neuron_reference = 6.6398	NA	0	NA	NA	0.0341654
Pgf	placental growth factor	12	86507589	86518246	-1	D2	ENSMUSG00000004791	FALSE	(ENSMUSG00000004791 ~ A_oligodendrocyte_reference) BIC = 6.95	1	FALSE	NA	NA	NA	0.0103671	NA	NA
Ulk2	Unc-51 like kinase 2 (C. elegans)	11	61589151	61668575	-1	B2	ENSMUSG00000004798	FALSE	(ENSMUSG00000004798 ~ A_microglia_reference + A_neuron_reference) BIC = -89.96;(ENSMUSG00000004798 ~ A_neuron_reference) BIC = -89.53;(ENSMUSG00000004798 ~ A_endothelial_reference + A_neuron_reference) BIC = -88.58	3	TRUE	A_microglia_reference = 1.8323;A_neuron_reference = 4.2738;A_endothelial_reference = 1.4487	NA	1.922e-05	NA	0.0669095	0.147431
Dgkq	diacylglycerol kinase, theta	5	109075712	109098691	-1	F	ENSMUSG00000004815	FALSE	(ENSMUSG00000004815 ~ A_endothelial_reference + A_microglia_reference + A_oligodendrocyte_reference) BIC = -38.37;(ENSMUSG00000004815 ~ A_microglia_reference + A_neuron_reference + A_oligodendrocyte_reference) BIC = -37.1;(ENSMUSG00000004815 ~ A_microglia_reference + A_oligodendrocyte_reference) BIC = -36.95;(ENSMUSG00000004815 ~ A_endothelial_reference + A_microglia_reference + A_neuron_referenc…	4	TRUE	A_endothelial_reference = 1.8392;A_microglia_reference = 3.7869;A_oligodendrocyte_reference = 2.8323;A_neuron_reference = 1.4	NA	0.161499	0.00462126	0.00015253	0.0658865
Grap	GRB2-related adaptor protein	11	61466767	61486286	1	B2	ENSMUSG00000004837	FALSE	(ENSMUSG00000004837 ~ A_endothelial_reference) BIC = 3.66	1	FALSE	NA	NA	NA	NA	NA	5.36128e-05
Chmp2b	charged multivesicular body protein 2B	16	65539378	65562942	-1	C1.3	ENSMUSG00000004843	FALSE	(ENSMUSG00000004843 ~ A_microglia_reference + A_neuron_reference + A_oligodendrocyte_reference) BIC = -58.59;(ENSMUSG00000004843 ~ A_astrocyte_reference + A_microglia_reference + A_oligodendrocyte_reference) BIC = -57.68;(ENSMUSG00000004843 ~ A_microglia_reference + A_neuron_reference) BIC = -57.41;(ENSMUSG00000004843 ~ A_astrocyte_reference + A_microglia_reference + A_neuron_reference + A_oligod…	4	TRUE	A_microglia_reference = 2.344;A_neuron_reference = 2.0944;A_oligodendrocyte_reference = 2.1999;A_astrocyte_reference = 1.5913	0.11155	0.0362243	0.0278112	0.0190801	NA
Plod3	procollagen-lysine, 2-oxoglutarate 5-dioxygenase 3	5	137462889	137472518	1	G2	ENSMUSG00000004846	FALSE	(ENSMUSG00000004846 ~ A_endothelial_reference) BIC = -56.3;(ENSMUSG00000004846 ~ 1) BIC = -55.13	2	TRUE	A_endothelial_reference = 2.0544	NA	NA	NA	NA	0.0399331
Ap1s1	adaptor protein complex AP-1, sigma 1	5	137510863	137522005	-1	G2	ENSMUSG00000004849	FALSE	(ENSMUSG00000004849 ~ A_endothelial_reference + A_microglia_reference + A_oligodendrocyte_reference) BIC = -55.93;(ENSMUSG00000004849 ~ A_endothelial_reference + A_oligodendrocyte_reference) BIC = -55.59	2	TRUE	A_endothelial_reference = 2.3047;A_microglia_reference = 1.7719;A_oligodendrocyte_reference = 5.1862	NA	NA	2.1e-07	0.0764055	0.0211833
Srpk1	serine/arginine-rich protein specific kinase 1	17	28724593	28759466	-1	A3.3	ENSMUSG00000004865	FALSE	(ENSMUSG00000004865 ~ A_endothelial_reference + A_oligodendrocyte_reference) BIC = -62.02	1	FALSE	NA	NA	NA	0.0059028	NA	0.0724757
Lbr	lamin B receptor	1	183745447	183772532	-1	H5	ENSMUSG00000004880	FALSE	(ENSMUSG00000004880 ~ A_endothelial_reference + A_oligodendrocyte_reference) BIC = -59.24;(ENSMUSG00000004880 ~ A_astrocyte_reference + A_endothelial_reference + A_neuron_reference + A_oligodendrocyte_reference) BIC = -58.67;(ENSMUSG00000004880 ~ A_endothelial_reference + A_neuron_reference + A_oligodendrocyte_reference) BIC = -57.56	3	TRUE	A_endothelial_reference = 2.4774;A_oligodendrocyte_reference = 3.1739;A_astrocyte_reference = 1.9165;A_neuron_reference = 1.577	0.0552954	0.114802	0.00150427	NA	0.0132337
Crabp2	cellular retinoic acid binding protein II	3	87752588	87757298	1	F1	ENSMUSG00000004885	FALSE	(ENSMUSG00000004885 ~ A_microglia_reference) BIC = 32.86	1	FALSE	NA	NA	NA	NA	3.05215e-06	NA
Nes	nestin	3	87775000	87784373	1	F1	ENSMUSG00000004891	FALSE	(ENSMUSG00000004891 ~ A_endothelial_reference + A_microglia_reference) BIC = 7.03;(ENSMUSG00000004891 ~ A_endothelial_reference + A_neuron_reference) BIC = 8.42;(ENSMUSG00000004891 ~ A_endothelial_reference) BIC = 8.97	3	TRUE	A_endothelial_reference = 5.0953;A_microglia_reference = 2.1906;A_neuron_reference = 1.8621	NA	0.0625878	NA	0.0284833	3.5e-07
Bcan	brevican	3	87791453	87804278	-1	F1	ENSMUSG00000004892	FALSE	(ENSMUSG00000004892 ~ A_endothelial_reference + A_neuron_reference) BIC = -47.36	1	FALSE	NA	NA	0.000265872	NA	NA	9.23913e-05
Hapln2	hyaluronan and proteoglycan link protein 2	3	87825672	87831505	-1	F1	ENSMUSG00000004894	FALSE	(ENSMUSG00000004894 ~ A_neuron_reference + A_oligodendrocyte_reference) BIC = 18.39;(ENSMUSG00000004894 ~ A_endothelial_reference + A_neuron_reference + A_oligodendrocyte_reference) BIC = 18.41;(ENSMUSG00000004894 ~ A_astrocyte_reference + A_neuron_reference + A_oligodendrocyte_reference) BIC = 19.88	3	TRUE	A_neuron_reference = 4.0929;A_oligodendrocyte_reference = 2.3994;A_endothelial_reference = 1.6775;A_astrocyte_reference = 1.2452	0.21304	4.261e-05	0.0164208	NA	0.0934408
Prcc	papillary renal cell carcinoma (translocation-associated)	3	87662822	87689530	-1	F1	ENSMUSG00000004895	FALSE	(ENSMUSG00000004895 ~ A_oligodendrocyte_reference) BIC = -62.78;(ENSMUSG00000004895 ~ A_astrocyte_reference + A_oligodendrocyte_reference) BIC = -60.87	2	TRUE	A_oligodendrocyte_reference = 2.1839;A_astrocyte_reference = 1.1193	0.263002	NA	0.0289712	NA	NA
Rrnad1	ribosomal RNA adenine dimethylase domain containing 1	3	87726523	87734639	-1	F1	ENSMUSG00000004896	FALSE	(ENSMUSG00000004896 ~ A_endothelial_reference + A_microglia_reference + A_oligodendrocyte_reference) BIC = -30.4;(ENSMUSG00000004896 ~ A_microglia_reference) BIC = -29.41;(ENSMUSG00000004896 ~ A_endothelial_reference + A_microglia_reference) BIC = -29.38;(ENSMUSG00000004896 ~ A_microglia_reference + A_neuron_reference) BIC = -29.35;(ENSMUSG00000004896 ~ A_microglia_reference + A_oligodendrocyte_r…	6	TRUE	A_endothelial_reference = 1.7921;A_microglia_reference = 2.8922;A_oligodendrocyte_reference = 1.8044;A_neuron_reference = 1.597	NA	0.110276	0.0711673	0.00382548	0.0731201
Hdgf	hepatoma-derived growth factor	3	87710243	87720054	1	F1	ENSMUSG00000004897	FALSE	(ENSMUSG00000004897 ~ A_neuron_reference + A_oligodendrocyte_reference) BIC = -77.99;(ENSMUSG00000004897 ~ A_endothelial_reference + A_neuron_reference) BIC = -77.95;(ENSMUSG00000004897 ~ A_endothelial_reference + A_neuron_reference + A_oligodendrocyte_reference) BIC = -77.48	3	TRUE	A_neuron_reference = 2.2012;A_oligodendrocyte_reference = 1.8756;A_endothelial_reference = 1.8594	NA	0.0277221	0.0607155	NA	0.0629645
Slc25a18	solute carrier family 25 (mitochondrial carrier), member 18	6	120723786	120744000	1	F1	ENSMUSG00000004902	FALSE	(ENSMUSG00000004902 ~ 1) BIC = -28.33;(ENSMUSG00000004902 ~ A_oligodendrocyte_reference) BIC = -26.92	2	TRUE	A_oligodendrocyte_reference = 1.3256	NA	NA	0.184967	NA	NA
Thop1	thimet oligopeptidase 1	10	80532780	80545304	1	C1	ENSMUSG00000004929	FALSE	(ENSMUSG00000004929 ~ A_neuron_reference + A_oligodendrocyte_reference) BIC = -54.53	1	FALSE	NA	NA	1.80889e-08	0.00281354	NA	NA
Apba3	amyloid beta (A4) precursor protein-binding, family A, member 3	10	80730917	80735991	1	C1	ENSMUSG00000004931	FALSE	(ENSMUSG00000004931 ~ A_endothelial_reference + A_microglia_reference) BIC = -33.92	1	FALSE	NA	NA	NA	NA	0.00771728	0.00259799
Matk	megakaryocyte-associated tyrosine kinase	10	80715680	80726110	1	C1	ENSMUSG00000004933	FALSE	(ENSMUSG00000004933 ~ A_endothelial_reference + A_microglia_reference + A_oligodendrocyte_reference) BIC = -26.61;(ENSMUSG00000004933 ~ A_astrocyte_reference + A_endothelial_reference + A_microglia_reference) BIC = -26.53;(ENSMUSG00000004933 ~ A_endothelial_reference + A_microglia_reference) BIC = -25.93;(ENSMUSG00000004933 ~ A_astrocyte_reference + A_endothelial_reference + A_microglia_reference…	5	TRUE	A_endothelial_reference = 3.1596;A_microglia_reference = 2.4121;A_oligodendrocyte_reference = 1.5984;A_astrocyte_reference = 1.6632	0.0962735	NA	0.109947	0.0158592	0.00157994
Pias4	protein inhibitor of activated STAT 4	10	80616011	80630668	-1	C1	ENSMUSG00000004934	FALSE	(ENSMUSG00000004934 ~ A_endothelial_reference) BIC = -43.02;(ENSMUSG00000004934 ~ A_neuron_reference + A_oligodendrocyte_reference) BIC = -42.92;(ENSMUSG00000004934 ~ A_microglia_reference + A_neuron_reference + A_oligodendrocyte_reference) BIC = -42.28;(ENSMUSG00000004934 ~ A_endothelial_reference + A_microglia_reference) BIC = -41.67;(ENSMUSG00000004934 ~ 1) BIC = -41.44;(ENSMUSG00000004934 ~ A…	8	TRUE	A_endothelial_reference = 1.7651;A_neuron_reference = 2.1531;A_oligodendrocyte_reference = 1.8927;A_microglia_reference = 1.4787	NA	0.0313105	0.0583965	0.139225	0.0775527
Map2k1	mitogen-activated protein kinase kinase 1	9	64033577	64101438	-1	C	ENSMUSG00000004936	FALSE	(ENSMUSG00000004936 ~ 1) BIC = -62.84;(ENSMUSG00000004936 ~ A_astrocyte_reference) BIC = -61.22;(ENSMUSG00000004936 ~ A_microglia_reference) BIC = -60.99	3	TRUE	A_astrocyte_reference = 1.2501;A_microglia_reference = 1.164	0.211252	NA	NA	0.244437	NA
Sgta	small glutamine-rich tetratricopeptide repeat (TPR)-containing, alpha	10	80506820	80522923	-1	C1	ENSMUSG00000004937	FALSE	(ENSMUSG00000004937 ~ A_oligodendrocyte_reference) BIC = -64.89;(ENSMUSG00000004937 ~ A_neuron_reference + A_oligodendrocyte_reference) BIC = -64.23	2	TRUE	A_oligodendrocyte_reference = 3.079;A_neuron_reference = 1.5354	NA	0.124688	0.00207713	NA	NA
5730437N04Rik	RIKEN cDNA 5730437N04 gene	17	5410864	5440260	-1	A1	ENSMUSG00000004945	FALSE	(ENSMUSG00000004945 ~ A_neuron_reference + A_oligodendrocyte_reference) BIC = -48.46	1	FALSE	NA	NA	0.0369111	0.00488662	NA	NA
Dtx2	deltex 2 homolog (Drosophila)	5	136470670	136508742	1	G2	ENSMUSG00000004947	FALSE	(ENSMUSG00000004947 ~ A_microglia_reference) BIC = -35.95;(ENSMUSG00000004947 ~ A_endothelial_reference + A_microglia_reference) BIC = -35.08;(ENSMUSG00000004947 ~ A_oligodendrocyte_reference) BIC = -35.07;(ENSMUSG00000004947 ~ A_endothelial_reference) BIC = -35.05;(ENSMUSG00000004947 ~ 1) BIC = -34.67;(ENSMUSG00000004947 ~ A_endothelial_reference + A_oligodendrocyte_reference) BIC = -34.27	6	TRUE	A_microglia_reference = 1.9141;A_endothelial_reference = 1.5947;A_oligodendrocyte_reference = 1.6893	NA	NA	0.0911548	0.0556104	0.110775
Hspb1	heat shock protein 1	5	136363789	136365433	1	G2	ENSMUSG00000004951	FALSE	(ENSMUSG00000004951 ~ A_astrocyte_reference + A_endothelial_reference) BIC = 41.26;(ENSMUSG00000004951 ~ A_astrocyte_reference + A_endothelial_reference + A_microglia_reference) BIC = 42.2	2	TRUE	A_astrocyte_reference = 2.6366;A_endothelial_reference = 2.311;A_microglia_reference = 1.4211	0.00837348	NA	NA	0.155295	0.0208319
Rasa4	RAS p21 protein activator 4	5	136559786	136587730	1	G2	ENSMUSG00000004952	FALSE	(ENSMUSG00000004952 ~ A_endothelial_reference + A_neuron_reference) BIC = -3.81;(ENSMUSG00000004952 ~ A_endothelial_reference + A_microglia_reference + A_neuron_reference) BIC = -2.52;(ENSMUSG00000004952 ~ A_astrocyte_reference + A_endothelial_reference + A_neuron_reference) BIC = -1.99	3	TRUE	A_endothelial_reference = 2.7194;A_neuron_reference = 3.1803;A_microglia_reference = 1.3124;A_astrocyte_reference = 1.1284	0.25915	0.00147122	NA	0.189383	0.00653935
Syt5	synaptotagmin V	7	4491370	4498169	-1	A1	ENSMUSG00000004961	FALSE	(ENSMUSG00000004961 ~ A_astrocyte_reference + A_oligodendrocyte_reference) BIC = -28.69;(ENSMUSG00000004961 ~ A_oligodendrocyte_reference) BIC = -28.68;(ENSMUSG00000004961 ~ A_microglia_reference + A_oligodendrocyte_reference) BIC = -28.45	3	TRUE	A_astrocyte_reference = 1.7201;A_oligodendrocyte_reference = 3.7265;A_microglia_reference = 1.6565	0.085415	NA	0.00019414	0.0976291	NA
Hnrnpa2b1	heterogeneous nuclear ribonucleoprotein A2/B1	6	51410433	51419893	-1	B3	ENSMUSG00000004980	FALSE	(ENSMUSG00000004980 ~ A_endothelial_reference + A_oligodendrocyte_reference) BIC = -40.54;(ENSMUSG00000004980 ~ A_neuron_reference) BIC = -40.14;(ENSMUSG00000004980 ~ A_oligodendrocyte_reference) BIC = -39.19;(ENSMUSG00000004980 ~ A_endothelial_reference + A_neuron_reference) BIC = -39.05	4	TRUE	A_endothelial_reference = 1.765;A_oligodendrocyte_reference = 2.3399;A_neuron_reference = 2.2673	NA	0.0233739	0.0192881	NA	0.0775615
Ccdc130	coiled-coil domain containing 130	8	86781694	86794279	-1	C3	ENSMUSG00000004994	FALSE	(ENSMUSG00000004994 ~ A_microglia_reference) BIC = -69.74	1	FALSE	NA	NA	NA	NA	0.00273082	NA
Mri1	methylthioribose-1-phosphate isomerase homolog (S. cerevisiae)	8	86773805	86781225	-1	C3	ENSMUSG00000004996	FALSE	(ENSMUSG00000004996 ~ A_astrocyte_reference + A_microglia_reference) BIC = -39.2;(ENSMUSG00000004996 ~ A_astrocyte_reference) BIC = -38.3;(ENSMUSG00000004996 ~ A_astrocyte_reference + A_microglia_reference + A_neuron_reference) BIC = -37.82	3	TRUE	A_astrocyte_reference = 2.6499;A_microglia_reference = 1.9631;A_neuron_reference = 1.2847	0.0080526	0.19891	NA	0.0496328	NA
Prkacb	protein kinase, cAMP dependent, catalytic, beta	3	146392543	146475924	-1	H2	ENSMUSG00000005034	FALSE	(ENSMUSG00000005034 ~ A_astrocyte_reference + A_endothelial_reference) BIC = -40.34;(ENSMUSG00000005034 ~ A_endothelial_reference + A_microglia_reference) BIC = -40.25;(ENSMUSG00000005034 ~ A_astrocyte_reference + A_endothelial_reference + A_microglia_reference) BIC = -38.88;(ENSMUSG00000005034 ~ A_endothelial_reference + A_microglia_reference + A_neuron_reference) BIC = -38.53	4	TRUE	A_astrocyte_reference = 2.0255;A_endothelial_reference = 4.2229;A_microglia_reference = 1.9483;A_neuron_reference = 1.1667	0.0428195	0.243347	NA	0.0513738	2.412e-05
Sgsh	N-sulfoglucosamine sulfohydrolase (sulfamidase)	11	119204739	119216850	-1	E2	ENSMUSG00000005043	FALSE	(ENSMUSG00000005043 ~ A_neuron_reference) BIC = -26.09;(ENSMUSG00000005043 ~ A_astrocyte_reference + A_neuron_reference) BIC = -24.53	2	TRUE	A_neuron_reference = 3.5479;A_astrocyte_reference = 1.2482	0.211952	0.00038838	NA	NA	NA
Chd5	chromodomain helicase DNA binding protein 5	4	151712760	151764303	1	E2	ENSMUSG00000005045	FALSE	(ENSMUSG00000005045 ~ A_microglia_reference + A_oligodendrocyte_reference) BIC = -41.43;(ENSMUSG00000005045 ~ A_microglia_reference) BIC = -40.36;(ENSMUSG00000005045 ~ A_endothelial_reference + A_microglia_reference + A_oligodendrocyte_reference) BIC = -39.87;(ENSMUSG00000005045 ~ A_microglia_reference + A_neuron_reference + A_oligodendrocyte_reference) BIC = -39.85	4	TRUE	A_microglia_reference = 2.9762;A_oligodendrocyte_reference = 1.8399;A_endothelial_reference = 1.2214;A_neuron_reference = 1.2157	NA	0.224117	0.0657885	0.00291862	0.221939
Cstb	cystatin B	10	77888415	77890364	1	C1	ENSMUSG00000005054	FALSE	(ENSMUSG00000005054 ~ A_neuron_reference + A_oligodendrocyte_reference) BIC = -48.07;(ENSMUSG00000005054 ~ A_microglia_reference + A_neuron_reference + A_oligodendrocyte_reference) BIC = -46.19	2	TRUE	A_neuron_reference = 5.0819;A_oligodendrocyte_reference = 3.4358;A_microglia_reference = 1.1074	NA	3.7e-07	0.00059089	0.268127	NA
Sh2b2	SH2B adaptor protein 2	5	136694019	136720773	-1	G2	ENSMUSG00000005057	FALSE	(ENSMUSG00000005057 ~ A_endothelial_reference + A_microglia_reference) BIC = -12.5;(ENSMUSG00000005057 ~ A_endothelial_reference + A_microglia_reference + A_oligodendrocyte_reference) BIC = -12.06;(ENSMUSG00000005057 ~ A_endothelial_reference + A_oligodendrocyte_reference) BIC = -12.02;(ENSMUSG00000005057 ~ A_microglia_reference) BIC = -11.65;(ENSMUSG00000005057 ~ A_neuron_reference) BIC = -11.57…	9	TRUE	A_endothelial_reference = 1.9083;A_microglia_reference = 2.1201;A_oligodendrocyte_reference = 2.0006;A_neuron_reference = 1.6289;A_astrocyte_reference = 2.3874	0.0169692	0.103332	0.0454386	0.0339955	0.0563505
Pex5	peroxisomal biogenesis factor 5	6	124346834	124365085	-1	F2	ENSMUSG00000005069	FALSE	(ENSMUSG00000005069 ~ A_microglia_reference + A_oligodendrocyte_reference) BIC = -80.43;(ENSMUSG00000005069 ~ A_endothelial_reference + A_microglia_reference + A_oligodendrocyte_reference) BIC = -79.99;(ENSMUSG00000005069 ~ A_oligodendrocyte_reference) BIC = -79.61	3	TRUE	A_microglia_reference = 2.0238;A_oligodendrocyte_reference = 3.1676;A_endothelial_reference = 1.5647	NA	NA	0.00153712	0.0429882	0.117656
Jkamp	JNK1/MAPK8-associated membrane protein	12	73186576	73202448	1	C3	ENSMUSG00000005078	FALSE	(ENSMUSG00000005078 ~ 1) BIC = -68.12;(ENSMUSG00000005078 ~ A_microglia_reference) BIC = -67.09;(ENSMUSG00000005078 ~ A_endothelial_reference + A_microglia_reference) BIC = -66.73;(ENSMUSG00000005078 ~ A_astrocyte_reference) BIC = -66.68;(ENSMUSG00000005078 ~ A_neuron_reference) BIC = -66.59;(ENSMUSG00000005078 ~ A_endothelial_reference) BIC = -66.29	6	TRUE	A_microglia_reference = 1.5994;A_endothelial_reference = 1.3909;A_astrocyte_reference = 1.3152;A_neuron_reference = 1.285	0.188438	0.19879	NA	0.109732	0.164251
Cd44	CD44 antigen	2	102651298	102741822	-1	E2	ENSMUSG00000005087	FALSE	(ENSMUSG00000005087 ~ A_oligodendrocyte_reference) BIC = -4	1	FALSE	NA	NA	NA	1.35464e-06	NA	NA
Slc1a2	solute carrier family 1 (glial high affinity glutamate transporter), member 2	2	102498816	102630941	1	E2	ENSMUSG00000005089	FALSE	(ENSMUSG00000005089 ~ A_endothelial_reference + A_oligodendrocyte_reference) BIC = -26.88;(ENSMUSG00000005089 ~ A_endothelial_reference) BIC = -26.34;(ENSMUSG00000005089 ~ A_endothelial_reference + A_microglia_reference) BIC = -26.24;(ENSMUSG00000005089 ~ A_oligodendrocyte_reference) BIC = -25.89;(ENSMUSG00000005089 ~ A_microglia_reference) BIC = -25.16	5	TRUE	A_endothelial_reference = 2.0611;A_oligodendrocyte_reference = 1.9681;A_microglia_reference = 1.8013	NA	NA	0.0490556	0.0716499	0.039291
Eif2ak4	eukaryotic translation initiation factor 2 alpha kinase 4	2	118214353	118300970	1	E5	ENSMUSG00000005102	FALSE	(ENSMUSG00000005102 ~ A_endothelial_reference + A_microglia_reference + A_oligodendrocyte_reference) BIC = -51.89;(ENSMUSG00000005102 ~ A_endothelial_reference + A_neuron_reference + A_oligodendrocyte_reference) BIC = -51.64;(ENSMUSG00000005102 ~ A_endothelial_reference + A_microglia_reference + A_neuron_reference + A_oligodendrocyte_reference) BIC = -51.2;(ENSMUSG00000005102 ~ A_endothelial_refe…	5	TRUE	A_endothelial_reference = 2.2776;A_microglia_reference = 1.7034;A_oligodendrocyte_reference = 2.2506;A_neuron_reference = 1.7389	NA	0.0820484	0.0244078	0.0884852	0.0227494
Wdr1	WD repeat domain 1	5	38918053	38952905	-1	B3	ENSMUSG00000005103	FALSE	(ENSMUSG00000005103 ~ A_neuron_reference) BIC = -65.11;(ENSMUSG00000005103 ~ A_endothelial_reference + A_oligodendrocyte_reference) BIC = -63.31;(ENSMUSG00000005103 ~ A_neuron_reference + A_oligodendrocyte_reference) BIC = -63.24;(ENSMUSG00000005103 ~ A_endothelial_reference + A_neuron_reference + A_oligodendrocyte_reference) BIC = -63.14	4	TRUE	A_neuron_reference = 2.5719;A_endothelial_reference = 1.8945;A_oligodendrocyte_reference = 1.6434	NA	0.0101144	0.100305	NA	0.0581521
Wisp1	WNT1 inducible signaling pathway protein 1	15	66722882	66754763	1	D2	ENSMUSG00000005124	FALSE	(ENSMUSG00000005124 ~ A_neuron_reference) BIC = 56.53;(ENSMUSG00000005124 ~ A_astrocyte_reference) BIC = 57.21;(ENSMUSG00000005124 ~ 1) BIC = 57.93;(ENSMUSG00000005124 ~ A_astrocyte_reference + A_endothelial_reference) BIC = 58.36	4	TRUE	A_neuron_reference = 2.1076;A_astrocyte_reference = 2.0142;A_endothelial_reference = 1.385	0.0439846	0.0350653	NA	NA	0.166044
Ndrg1	N-myc downstream regulated gene 1	15	66760883	66801202	-1	D2	ENSMUSG00000005125	FALSE	(ENSMUSG00000005125 ~ A_neuron_reference + A_oligodendrocyte_reference) BIC = -6.14;(ENSMUSG00000005125 ~ A_endothelial_reference + A_neuron_reference + A_oligodendrocyte_reference) BIC = -4.48	2	TRUE	A_neuron_reference = 3.6394;A_oligodendrocyte_reference = 2.2971;A_endothelial_reference = 1.1873	NA	0.00027332	0.021611	NA	0.235114
Man2b1	mannosidase 2, alpha B1	8	87607168	87622638	1	C3	ENSMUSG00000005142	FALSE	(ENSMUSG00000005142 ~ A_endothelial_reference + A_microglia_reference + A_oligodendrocyte_reference) BIC = -56.4;(ENSMUSG00000005142 ~ A_microglia_reference + A_neuron_reference) BIC = -55.51;(ENSMUSG00000005142 ~ A_endothelial_reference + A_microglia_reference + A_neuron_reference) BIC = -54.61;(ENSMUSG00000005142 ~ A_microglia_reference + A_oligodendrocyte_reference) BIC = -54.56	4	TRUE	A_endothelial_reference = 1.844;A_microglia_reference = 2.8629;A_oligodendrocyte_reference = 2.1619;A_neuron_reference = 2.0237	NA	0.0430046	0.030625	0.00419833	0.0651848
Klf5	Kruppel-like factor 5	14	99697910	99712624	1	E2.2	ENSMUSG00000005148	FALSE	(ENSMUSG00000005148 ~ 1) BIC = 5.4;(ENSMUSG00000005148 ~ A_endothelial_reference) BIC = 6.93	2	TRUE	A_endothelial_reference = 1.2851	NA	NA	NA	NA	0.198752
Wdr83	WD repeat domain containing 83	8	87598934	87605205	-1	C3	ENSMUSG00000005150	FALSE	(ENSMUSG00000005150 ~ A_oligodendrocyte_reference) BIC = -61.18;(ENSMUSG00000005150 ~ A_astrocyte_reference + A_oligodendrocyte_reference) BIC = -60.74;(ENSMUSG00000005150 ~ A_endothelial_reference + A_oligodendrocyte_reference) BIC = -60.35;(ENSMUSG00000005150 ~ A_astrocyte_reference + A_endothelial_reference) BIC = -60.32;(ENSMUSG00000005150 ~ A_astrocyte_reference) BIC = -60.14;(ENSMUSG0000000…	8	TRUE	A_oligodendrocyte_reference = 2.2213;A_astrocyte_reference = 1.9945;A_endothelial_reference = 1.5765;A_neuron_reference = 1.3939;A_microglia_reference = 1.234	0.0460947	0.163343	0.0263288	0.217209	0.1149
Prdx2	peroxiredoxin 2	8	87493486	87498733	1	C3	ENSMUSG00000005161	FALSE	(ENSMUSG00000005161 ~ A_neuron_reference + A_oligodendrocyte_reference) BIC = -62.35	1	FALSE	NA	NA	0.0168619	0.00089507	NA	NA
Polr2a	polymerase (RNA) II (DNA directed) polypeptide A	11	69547499	69572139	-1	B3	ENSMUSG00000005198	FALSE	(ENSMUSG00000005198 ~ A_endothelial_reference + A_microglia_reference) BIC = -25.06;(ENSMUSG00000005198 ~ A_neuron_reference) BIC = -24.25;(ENSMUSG00000005198 ~ A_microglia_reference) BIC = -24.13;(ENSMUSG00000005198 ~ A_astrocyte_reference) BIC = -23.96;(ENSMUSG00000005198 ~ A_astrocyte_reference + A_endothelial_reference) BIC = -23.87;(ENSMUSG00000005198 ~ A_microglia_reference + A_neuron_refer…	8	TRUE	A_endothelial_reference = 1.823;A_microglia_reference = 2.116;A_neuron_reference = 1.6097;A_astrocyte_reference = 2.5692;A_oligodendrocyte_reference = 1.7782	0.0101926	0.107466	0.0753719	0.0343462	0.0682989
Senp3	SUMO/sentrin specific peptidase 3	11	69486612	69495586	-1	B3	ENSMUSG00000005204	FALSE	(ENSMUSG00000005204 ~ A_oligodendrocyte_reference) BIC = -87.42;(ENSMUSG00000005204 ~ A_endothelial_reference + A_oligodendrocyte_reference) BIC = -86.24;(ENSMUSG00000005204 ~ A_endothelial_reference) BIC = -85.94;(ENSMUSG00000005204 ~ 1) BIC = -85.84	4	TRUE	A_oligodendrocyte_reference = 2.0003;A_endothelial_reference = 1.5305	NA	NA	0.0454716	NA	0.125893
Corin	corin	5	72691264	72895712	-1	C3.2	ENSMUSG00000005220	FALSE	(ENSMUSG00000005220 ~ A_endothelial_reference + A_oligodendrocyte_reference) BIC = 66.89;(ENSMUSG00000005220 ~ A_neuron_reference + A_oligodendrocyte_reference) BIC = 67.36;(ENSMUSG00000005220 ~ A_oligodendrocyte_reference) BIC = 67.41;(ENSMUSG00000005220 ~ A_endothelial_reference + A_neuron_reference + A_oligodendrocyte_reference) BIC = 68.48	4	TRUE	A_endothelial_reference = 1.6657;A_oligodendrocyte_reference = 3.1908;A_neuron_reference = 1.5018	NA	0.133152	0.0014188	NA	0.0957799
Plekha8	pleckstrin homology domain containing, family A (phosphoinositide binding specific) member 8	6	54545105	54595833	1	B3	ENSMUSG00000005225	FALSE	(ENSMUSG00000005225 ~ A_oligodendrocyte_reference) BIC = -38.77	1	FALSE	NA	NA	NA	0.0255141	NA	NA
Dnahc2	dynein, axonemal, heavy chain 2	11	69234311	69362612	-1	B3	ENSMUSG00000005237	FALSE	(ENSMUSG00000005237 ~ 1) BIC = 0.02;(ENSMUSG00000005237 ~ A_microglia_reference) BIC = 1.1;(ENSMUSG00000005237 ~ A_astrocyte_reference) BIC = 1.21;(ENSMUSG00000005237 ~ A_neuron_reference) BIC = 1.32	4	TRUE	A_microglia_reference = 1.4355;A_astrocyte_reference = 1.3996;A_neuron_reference = 1.3632	0.161631	0.172828	NA	0.151134	NA
Ufd1l	ubiquitin fusion degradation 1 like	16	18811872	18835354	1	A3	ENSMUSG00000005262	FALSE	(ENSMUSG00000005262 ~ A_astrocyte_reference + A_endothelial_reference + A_oligodendrocyte_reference) BIC = -72.14;(ENSMUSG00000005262 ~ A_astrocyte_reference + A_endothelial_reference) BIC = -71.1;(ENSMUSG00000005262 ~ A_neuron_reference) BIC = -70.65	3	TRUE	A_astrocyte_reference = 2.3638;A_endothelial_reference = 2.3806;A_oligodendrocyte_reference = 1.9427;A_neuron_reference = 3.7365	0.0180896	0.00018657	0.0520581	NA	0.0172836
Zfp287	zinc finger protein 287	11	62513858	62545407	-1	B2	ENSMUSG00000005267	FALSE	(ENSMUSG00000005267 ~ A_astrocyte_reference + A_endothelial_reference) BIC = -61.79;(ENSMUSG00000005267 ~ A_endothelial_reference + A_neuron_reference) BIC = -60.33	2	TRUE	A_astrocyte_reference = 2.8087;A_endothelial_reference = 3.249;A_neuron_reference = 2.5198	0.00497358	0.0117422	NA	NA	0.00115813
Prlr	prolactin receptor	15	10106993	10303504	1	A1	ENSMUSG00000005268	FALSE	(ENSMUSG00000005268 ~ 1) BIC = 64.05;(ENSMUSG00000005268 ~ A_neuron_reference) BIC = 65.12;(ENSMUSG00000005268 ~ A_endothelial_reference) BIC = 65.83	3	TRUE	A_neuron_reference = 1.4401;A_endothelial_reference = 1.1934	NA	0.149836	NA	NA	0.232702
Letm1	leucine zipper-EF-hand containing transmembrane protein 1	5	34082322	34125466	-1	B2	ENSMUSG00000005299	FALSE	(ENSMUSG00000005299 ~ A_astrocyte_reference) BIC = -98.06	1	FALSE	NA	0.00575638	NA	NA	NA	NA
Ubqln1	ubiquilin 1	13	58277524	58316997	-1	B1	ENSMUSG00000005312	FALSE	(ENSMUSG00000005312 ~ A_neuron_reference) BIC = -78.64	1	FALSE	NA	NA	9.45265e-05	NA	NA	NA
Cadm3	cell adhesion molecule 3	1	175264385	175297826	-1	H3	ENSMUSG00000005338	FALSE	(ENSMUSG00000005338 ~ A_neuron_reference) BIC = -45.88;(ENSMUSG00000005338 ~ A_astrocyte_reference + A_neuron_reference) BIC = -45.65;(ENSMUSG00000005338 ~ A_microglia_reference + A_neuron_reference) BIC = -44.12	3	TRUE	A_neuron_reference = 3.1643;A_astrocyte_reference = 1.6578;A_microglia_reference = 1.1772	0.0973483	0.0015544	NA	0.23913	NA
Txn2	thioredoxin 2	15	77745477	77759436	-1	E1	ENSMUSG00000005354	FALSE	(ENSMUSG00000005354 ~ A_neuron_reference + A_oligodendrocyte_reference) BIC = -64.92;(ENSMUSG00000005354 ~ A_endothelial_reference + A_neuron_reference + A_oligodendrocyte_reference) BIC = -64.54;(ENSMUSG00000005354 ~ A_endothelial_reference + A_microglia_reference + A_neuron_reference + A_oligodendrocyte_reference) BIC = -63.4	3	TRUE	A_neuron_reference = 2.6578;A_oligodendrocyte_reference = 3.977;A_endothelial_reference = 1.6618;A_microglia_reference = 1.3309	NA	0.00786626	6.978e-05	0.18321	0.09656
Slc1a6	solute carrier family 1 (high affinity aspartate/glutamate transporter), member 6	10	78243241	78277570	1	C1	ENSMUSG00000005357	FALSE	(ENSMUSG00000005357 ~ A_microglia_reference) BIC = -8.38;(ENSMUSG00000005357 ~ A_endothelial_reference + A_microglia_reference) BIC = -6.53	2	TRUE	A_microglia_reference = 2.5262;A_endothelial_reference = 1.1434	NA	NA	NA	0.0115296	0.252861
Slc1a3	solute carrier family 1 (glial high affinity glutamate transporter), member 3	15	8584124	8660764	-1	A1	ENSMUSG00000005360	FALSE	(ENSMUSG00000005360 ~ A_microglia_reference + A_neuron_reference) BIC = -36.31;(ENSMUSG00000005360 ~ A_microglia_reference + A_neuron_reference + A_oligodendrocyte_reference) BIC = -34.5	2	TRUE	A_microglia_reference = 2.5238;A_neuron_reference = 2.3383;A_oligodendrocyte_reference = 1.1313	NA	0.0193703	0.257924	0.0116103	NA
Crbn	cereblon	6	106728243	106750068	-1	E1	ENSMUSG00000005362	FALSE	(ENSMUSG00000005362 ~ 1) BIC = -85.3;(ENSMUSG00000005362 ~ A_endothelial_reference) BIC = -84.24	2	TRUE	A_endothelial_reference = 1.4442	NA	NA	NA	NA	0.148682
Msh6	mutS homolog 6 (E. coli)	17	88374390	88390223	1	E4	ENSMUSG00000005370	FALSE	(ENSMUSG00000005370 ~ A_endothelial_reference) BIC = -67.07;(ENSMUSG00000005370 ~ 1) BIC = -65.59	2	TRUE	A_endothelial_reference = 2.1287	NA	NA	NA	NA	0.0332793
Fbxo11	F-box protein 11	17	88390199	88464631	-1	E4	ENSMUSG00000005371	FALSE	(ENSMUSG00000005371 ~ A_endothelial_reference) BIC = -90.87;(ENSMUSG00000005371 ~ A_endothelial_reference + A_neuron_reference) BIC = -89.08	2	TRUE	A_endothelial_reference = 3.0451;A_neuron_reference = 1.1671	NA	0.243178	NA	NA	0.00232564
Mlxipl	MLX interacting protein-like	5	135582761	135614254	1	G2	ENSMUSG00000005373	FALSE	(ENSMUSG00000005373 ~ 1) BIC = -31.85;(ENSMUSG00000005373 ~ A_neuron_reference) BIC = -31;(ENSMUSG00000005373 ~ A_astrocyte_reference) BIC = -30.93	3	TRUE	A_neuron_reference = 1.5091;A_astrocyte_reference = 1.487	0.137025	0.131278	NA	NA	NA
Tbl2	transducin (beta)-like 2	5	135625527	135639743	1	G2	ENSMUSG00000005374	FALSE	(ENSMUSG00000005374 ~ A_endothelial_reference + A_oligodendrocyte_reference) BIC = -60.33;(ENSMUSG00000005374 ~ A_astrocyte_reference + A_endothelial_reference + A_neuron_reference + A_oligodendrocyte_reference) BIC = -59.14;(ENSMUSG00000005374 ~ A_endothelial_reference + A_neuron_reference + A_oligodendrocyte_reference) BIC = -58.43	3	TRUE	A_endothelial_reference = 3.8805;A_oligodendrocyte_reference = 2.4546;A_astrocyte_reference = 1.8247;A_neuron_reference = 1.4503	0.0680447	0.146976	0.014103	NA	0.00010425
Wbscr22	Williams Beuren syndrome chromosome region 22	5	135528827	135540829	-1	G2	ENSMUSG00000005378	FALSE	(ENSMUSG00000005378 ~ A_endothelial_reference + A_neuron_reference) BIC = -74.92;(ENSMUSG00000005378 ~ A_endothelial_reference + A_oligodendrocyte_reference) BIC = -74.17	2	TRUE	A_endothelial_reference = 4.0592;A_neuron_reference = 2.8439;A_oligodendrocyte_reference = 2.6988	NA	0.00445674	0.00695921	NA	4.9248e-05
Nid1	nidogen 1	13	13529869	13604542	1	A1	ENSMUSG00000005397	FALSE	(ENSMUSG00000005397 ~ A_microglia_reference + A_oligodendrocyte_reference) BIC = 10.33	1	FALSE	NA	NA	NA	0.00446042	3.27544e-05	NA
Mcm5	minichromosome maintenance deficient 5, cell division cycle 46 (S. cerevisiae)	8	77633427	77652338	1	C1	ENSMUSG00000005410	FALSE	(ENSMUSG00000005410 ~ 1) BIC = -22.33;(ENSMUSG00000005410 ~ A_astrocyte_reference) BIC = -21.96;(ENSMUSG00000005410 ~ A_astrocyte_reference + A_endothelial_reference) BIC = -20.4	3	TRUE	A_astrocyte_reference = 1.7052;A_endothelial_reference = 1.2489	0.0881603	NA	NA	NA	0.211707
Hmox1	heme oxygenase (decycling) 1	8	77617490	77624495	1	C1	ENSMUSG00000005413	FALSE	(ENSMUSG00000005413 ~ A_astrocyte_reference + A_neuron_reference) BIC = -21.02	1	FALSE	NA	0.001608	0.00164141	NA	NA	NA
Mprip	myosin phosphatase Rho interacting protein	11	59474807	59594362	1	B1.3	ENSMUSG00000005417	FALSE	(ENSMUSG00000005417 ~ A_oligodendrocyte_reference) BIC = -65	1	FALSE	NA	NA	NA	0.000165329	NA	NA
Cic	capicua homolog (Drosophila)	7	26052723	26079178	1	A3	ENSMUSG00000005442	FALSE	(ENSMUSG00000005442 ~ A_endothelial_reference + A_neuron_reference) BIC = -63.04	1	FALSE	NA	NA	0.00117373	NA	NA	0.0248964
Pafah1b3	platelet-activating factor acetylhydrolase, isoform 1b, subunit 3	7	26080068	26083005	-1	A3	ENSMUSG00000005447	FALSE	(ENSMUSG00000005447 ~ A_oligodendrocyte_reference) BIC = -24.08	1	FALSE	NA	NA	NA	0.0015248	NA	NA
Prkaca	protein kinase, cAMP dependent, catalytic, alpha	8	86496877	86520344	1	C3	ENSMUSG00000005469	FALSE	(ENSMUSG00000005469 ~ 1) BIC = -54.05	1	FALSE	NA	NA	NA	NA	NA	NA
Ddx39	DEAD (Asp-Glu-Ala-Asp) box polypeptide 39	8	86239076	86250791	1	C2	ENSMUSG00000005481	FALSE	(ENSMUSG00000005481 ~ A_endothelial_reference) BIC = -50.2;(ENSMUSG00000005481 ~ A_endothelial_reference + A_microglia_reference) BIC = -48.88	2	TRUE	A_endothelial_reference = 2.2794;A_microglia_reference = 1.3304	NA	NA	NA	0.183388	0.0226404
Dnajb1	DnaJ (Hsp40) homolog, subfamily B, member 1	8	86132074	86135801	1	C2	ENSMUSG00000005483	FALSE	(ENSMUSG00000005483 ~ 1) BIC = -1.2	1	FALSE	NA	NA	NA	NA	NA	NA
Msh4	mutS homolog 4 (E. coli)	3	153520111	153569102	-1	H3	ENSMUSG00000005493	FALSE	(ENSMUSG00000005493 ~ A_neuron_reference) BIC = -8.52	1	FALSE	NA	NA	0.00588574	NA	NA	NA
Usp40	ubiquitin specific peptidase 40	1	89841696	89905126	-1	D	ENSMUSG00000005501	FALSE	(ENSMUSG00000005501 ~ A_endothelial_reference + A_microglia_reference + A_oligodendrocyte_reference) BIC = -49.13;(ENSMUSG00000005501 ~ A_microglia_reference + A_oligodendrocyte_reference) BIC = -48.2	2	TRUE	A_endothelial_reference = 1.9175;A_microglia_reference = 2.4344;A_oligodendrocyte_reference = 3.5251	NA	NA	0.00042336	0.014918	0.0551797
Kbtbd4	kelch repeat and BTB (POZ) domain containing 4	2	90744897	90751783	1	E1	ENSMUSG00000005505	FALSE	(ENSMUSG00000005505 ~ A_endothelial_reference + A_oligodendrocyte_reference) BIC = -65.51;(ENSMUSG00000005505 ~ A_oligodendrocyte_reference) BIC = -64.03	2	TRUE	A_endothelial_reference = 2.0873;A_oligodendrocyte_reference = 3.996	NA	NA	6.443e-05	NA	0.0368607
Celf1	CUGBP, Elav-like family member 1	2	90780539	90859654	1	E1	ENSMUSG00000005506	FALSE	(ENSMUSG00000005506 ~ 1) BIC = -52.15;(ENSMUSG00000005506 ~ A_neuron_reference) BIC = -52.14;(ENSMUSG00000005506 ~ A_endothelial_reference + A_neuron_reference) BIC = -52.12;(ENSMUSG00000005506 ~ A_endothelial_reference) BIC = -51.89;(ENSMUSG00000005506 ~ A_neuron_reference + A_oligodendrocyte_reference) BIC = -51.05;(ENSMUSG00000005506 ~ A_microglia_reference + A_neuron_reference) BIC = -50.27	6	TRUE	A_neuron_reference = 1.6358;A_endothelial_reference = 1.697;A_oligodendrocyte_reference = 1.4023;A_microglia_reference = 1.1322	NA	0.101892	0.160836	0.257555	0.0897017
Ndufs3	NADH dehydrogenase (ubiquinone) Fe-S protein 3	2	90734791	90744984	-1	E1	ENSMUSG00000005510	FALSE	(ENSMUSG00000005510 ~ A_endothelial_reference + A_neuron_reference + A_oligodendrocyte_reference) BIC = -58.53;(ENSMUSG00000005510 ~ A_endothelial_reference + A_microglia_reference + A_neuron_reference + A_oligodendrocyte_reference) BIC = -57.79	2	TRUE	A_endothelial_reference = 2.412;A_neuron_reference = 3.5121;A_oligodendrocyte_reference = 2.5638;A_microglia_reference = 1.4488	NA	0.00044463	0.0103544	0.14738	0.0158661
Por	P450 (cytochrome) oxidoreductase	5	136145903	136211196	1	G2	ENSMUSG00000005514	FALSE	(ENSMUSG00000005514 ~ 1) BIC = -57.37;(ENSMUSG00000005514 ~ A_oligodendrocyte_reference) BIC = -56.4	2	TRUE	A_oligodendrocyte_reference = 1.4722	NA	NA	0.140971	NA	NA
Igf1r	insulin-like growth factor I receptor	7	75097713	75371484	1	D1	ENSMUSG00000005533	FALSE	(ENSMUSG00000005533 ~ A_endothelial_reference + A_neuron_reference) BIC = 23.15;(ENSMUSG00000005533 ~ A_endothelial_reference + A_neuron_reference + A_oligodendrocyte_reference) BIC = 24.14;(ENSMUSG00000005533 ~ A_endothelial_reference) BIC = 24.36	3	TRUE	A_endothelial_reference = 2.8203;A_neuron_reference = 1.7455;A_oligodendrocyte_reference = 1.4054	NA	0.0809006	0.159909	NA	0.0047982
Insr	insulin receptor	8	3150922	3279617	-1	A1.1	ENSMUSG00000005534	FALSE	(ENSMUSG00000005534 ~ A_oligodendrocyte_reference) BIC = -41.74;(ENSMUSG00000005534 ~ A_endothelial_reference + A_oligodendrocyte_reference) BIC = -40.68;(ENSMUSG00000005534 ~ A_astrocyte_reference + A_oligodendrocyte_reference) BIC = -40.18	3	TRUE	A_oligodendrocyte_reference = 2.7856;A_endothelial_reference = 1.4163;A_astrocyte_reference = 1.2513	0.210832	NA	0.0053432	NA	0.15668
Cyp2a5	cytochrome P450, family 2, subfamily a, polypeptide 5	7	27620324	27628567	1	A3	ENSMUSG00000005547	FALSE	(ENSMUSG00000005547 ~ A_oligodendrocyte_reference) BIC = 93.72;(ENSMUSG00000005547 ~ 1) BIC = 94.38;(ENSMUSG00000005547 ~ A_neuron_reference) BIC = 94.71;(ENSMUSG00000005547 ~ A_microglia_reference) BIC = 95.29	4	TRUE	A_oligodendrocyte_reference = 1.9264;A_neuron_reference = 1.6625;A_microglia_reference = 1.4894	NA	0.0964209	0.0540565	0.136392	NA
Atp4a	ATPase, H+/K+ exchanging, gastric, alpha polypeptide	7	31497228	31510554	1	B1	ENSMUSG00000005553	FALSE	(ENSMUSG00000005553 ~ A_astrocyte_reference) BIC = 26.19	1	FALSE	NA	1.36308e-05	NA	NA	NA	NA
Trim28	tripartite motif-containing 28	7	13609501	13616384	1	A1	ENSMUSG00000005566	FALSE	(ENSMUSG00000005566 ~ A_microglia_reference + A_oligodendrocyte_reference) BIC = -55.54;(ENSMUSG00000005566 ~ A_microglia_reference) BIC = -54.51;(ENSMUSG00000005566 ~ A_oligodendrocyte_reference) BIC = -53.98;(ENSMUSG00000005566 ~ A_endothelial_reference + A_microglia_reference + A_oligodendrocyte_reference) BIC = -53.74	4	TRUE	A_microglia_reference = 2.1873;A_oligodendrocyte_reference = 2.02;A_endothelial_reference = 1.137	NA	NA	0.043388	0.0287204	0.255518
Ube2m	ubiquitin-conjugating enzyme E2M (UBC12 homolog, yeast)	7	13620587	13623622	-1	A1	ENSMUSG00000005575	FALSE	(ENSMUSG00000005575 ~ A_endothelial_reference + A_neuron_reference + A_oligodendrocyte_reference) BIC = -56.42;(ENSMUSG00000005575 ~ A_neuron_reference + A_oligodendrocyte_reference) BIC = -55.25	2	TRUE	A_endothelial_reference = 1.9713;A_neuron_reference = 2.3745;A_oligodendrocyte_reference = 3.0504	NA	0.0175728	0.00228553	NA	0.0486863
Adcy9	adenylate cyclase 9	16	4287529	4420498	-1	A1	ENSMUSG00000005580	FALSE	(ENSMUSG00000005580 ~ A_endothelial_reference + A_neuron_reference) BIC = -0.61;(ENSMUSG00000005580 ~ A_endothelial_reference + A_neuron_reference + A_oligodendrocyte_reference) BIC = 0.51;(ENSMUSG00000005580 ~ A_astrocyte_reference + A_endothelial_reference + A_neuron_reference) BIC = 1.07;(ENSMUSG00000005580 ~ A_neuron_reference + A_oligodendrocyte_reference) BIC = 1.34	4	TRUE	A_endothelial_reference = 2.2442;A_neuron_reference = 2.2519;A_oligodendrocyte_reference = 1.5817;A_astrocyte_reference = 1.1832	0.236718	0.0243291	0.113723	NA	0.0248177
Mef2c	myocyte enhancer factor 2C	13	83643033	83806684	1	C3	ENSMUSG00000005583	FALSE	(ENSMUSG00000005583 ~ A_microglia_reference + A_neuron_reference) BIC = -18;(ENSMUSG00000005583 ~ A_endothelial_reference + A_neuron_reference) BIC = -17.89;(ENSMUSG00000005583 ~ A_endothelial_reference + A_microglia_reference + A_neuron_reference) BIC = -17.23;(ENSMUSG00000005583 ~ A_neuron_reference) BIC = -17.07	4	TRUE	A_microglia_reference = 1.7341;A_neuron_reference = 6.9208;A_endothelial_reference = 1.6971	NA	0	NA	0.082893	0.0896762
Ctr9	Ctr9, Paf1/RNA polymerase II complex component, homolog (S. cerevisiae)	7	118172465	118199891	1	F1	ENSMUSG00000005609	FALSE	(ENSMUSG00000005609 ~ A_microglia_reference) BIC = -98.78;(ENSMUSG00000005609 ~ A_astrocyte_reference + A_microglia_reference) BIC = -98.21;(ENSMUSG00000005609 ~ A_astrocyte_reference) BIC = -97.58	3	TRUE	A_microglia_reference = 2.4703;A_astrocyte_reference = 1.9021	0.057163	NA	NA	0.0135017	NA
Eif4g2	eukaryotic translation initiation factor 4, gamma 2	7	118211499	118226544	-1	F1	ENSMUSG00000005610	FALSE	(ENSMUSG00000005610 ~ A_microglia_reference + A_oligodendrocyte_reference) BIC = -89.27;(ENSMUSG00000005610 ~ A_microglia_reference + A_neuron_reference + A_oligodendrocyte_reference) BIC = -88.25;(ENSMUSG00000005610 ~ A_endothelial_reference + A_microglia_reference + A_oligodendrocyte_reference) BIC = -88.11;(ENSMUSG00000005610 ~ A_astrocyte_reference + A_microglia_reference + A_oligodendrocyte_…	4	TRUE	A_microglia_reference = 2.7773;A_oligodendrocyte_reference = 4.1026;A_neuron_reference = 1.3969;A_endothelial_reference = 1.3546;A_astrocyte_reference = 1.1753	0.239887	0.162454	4.086e-05	0.00548127	0.175546
Mrvi1	MRV integration site 1	7	118011780	118125975	-1	F1	ENSMUSG00000005611	FALSE	(ENSMUSG00000005611 ~ A_endothelial_reference + A_microglia_reference + A_oligodendrocyte_reference) BIC = 22.5;(ENSMUSG00000005611 ~ A_endothelial_reference + A_oligodendrocyte_reference) BIC = 23.49	2	TRUE	A_endothelial_reference = 4.0962;A_microglia_reference = 1.9317;A_oligodendrocyte_reference = 3.345	NA	NA	0.00082287	0.0533912	4.2e-05
Pcyt1a	phosphate cytidylyltransferase 1, choline, alpha isoform	16	32431007	32475156	1	B3	ENSMUSG00000005615	FALSE	(ENSMUSG00000005615 ~ A_astrocyte_reference + A_oligodendrocyte_reference) BIC = -78.13	1	FALSE	NA	6.38601e-09	NA	5.55802e-05	NA	NA
Zfp592	zinc finger protein 592	7	88138567	88190050	1	D3	ENSMUSG00000005621	FALSE	(ENSMUSG00000005621 ~ A_astrocyte_reference + A_oligodendrocyte_reference) BIC = -59.99;(ENSMUSG00000005621 ~ A_astrocyte_reference + A_microglia_reference + A_oligodendrocyte_reference) BIC = -58.57	2	TRUE	A_astrocyte_reference = 2.6591;A_oligodendrocyte_reference = 2.3899;A_microglia_reference = 1.2687	0.0078361	NA	0.0168513	0.204553	NA
Psmd4	proteasome (prosome, macropain) 26S subunit, non-ATPase, 4	3	94836616	94846536	-1	F2.1	ENSMUSG00000005625	FALSE	(ENSMUSG00000005625 ~ A_endothelial_reference) BIC = -59.83;(ENSMUSG00000005625 ~ A_endothelial_reference + A_neuron_reference + A_oligodendrocyte_reference) BIC = -58.84;(ENSMUSG00000005625 ~ A_neuron_reference + A_oligodendrocyte_reference) BIC = -58.02	3	TRUE	A_endothelial_reference = 2.2769;A_neuron_reference = 2.1251;A_oligodendrocyte_reference = 2.4007	NA	0.0335823	0.016364	NA	0.0227934
Insrr	insulin receptor-related receptor	3	87600873	87620023	1	F1	ENSMUSG00000005640	FALSE	(ENSMUSG00000005640 ~ A_neuron_reference + A_oligodendrocyte_reference) BIC = 42.32	1	FALSE	NA	NA	1.18519e-09	0.00143354	NA	NA
Snx6	sorting nexin 6	12	55847336	55896690	-1	C1	ENSMUSG00000005656	FALSE	(ENSMUSG00000005656 ~ A_microglia_reference) BIC = -68.86	1	FALSE	NA	NA	NA	NA	0.00113454	NA
Mthfd2	methylenetetrahydrofolate dehydrogenase (NAD+ dependent), methenyltetrahydrofolate cyclohydrolase	6	83255685	83267600	-1	C3	ENSMUSG00000005667	FALSE	(ENSMUSG00000005667 ~ A_neuron_reference) BIC = -29.29;(ENSMUSG00000005667 ~ A_oligodendrocyte_reference) BIC = -28.58;(ENSMUSG00000005667 ~ A_endothelial_reference + A_neuron_reference) BIC = -28.43	3	TRUE	A_neuron_reference = 3.2166;A_oligodendrocyte_reference = 3.0429;A_endothelial_reference = 1.4773	NA	0.00129728	0.00234305	NA	0.1396
Kit	kit oncogene	5	75970941	76052747	1	C3.3	ENSMUSG00000005672	FALSE	(ENSMUSG00000005672 ~ A_endothelial_reference) BIC = -38.14	1	FALSE	NA	NA	NA	NA	NA	0.0164453
Tomm40l	translocase of outer mitochondrial membrane 40 homolog-like (yeast)	1	173147933	173152645	-1	H3	ENSMUSG00000005674	FALSE	(ENSMUSG00000005674 ~ A_neuron_reference + A_oligodendrocyte_reference) BIC = -60.97;(ENSMUSG00000005674 ~ A_astrocyte_reference + A_endothelial_reference) BIC = -59.65;(ENSMUSG00000005674 ~ A_endothelial_reference + A_neuron_reference) BIC = -59.15;(ENSMUSG00000005674 ~ A_neuron_reference) BIC = -59.12	4	TRUE	A_neuron_reference = 2.4503;A_oligodendrocyte_reference = 2.172;A_astrocyte_reference = 3.1581;A_endothelial_reference = 1.9657	0.00158796	0.0142751	0.0298533	NA	0.0493374
Apoa2	apolipoprotein A-II	1	173155185	173156510	1	H3	ENSMUSG00000005681	FALSE	(ENSMUSG00000005681 ~ 1) BIC = 24.02	1	FALSE	NA	NA	NA	NA	NA	NA
Pan2	PAN2 polyA specific ribonuclease subunit homolog (S. cerevisiae)	10	127740391	127758403	1	D3	ENSMUSG00000005682	FALSE	(ENSMUSG00000005682 ~ A_endothelial_reference + A_microglia_reference + A_oligodendrocyte_reference) BIC = -27.99;(ENSMUSG00000005682 ~ A_endothelial_reference + A_oligodendrocyte_reference) BIC = -26.24;(ENSMUSG00000005682 ~ A_endothelial_reference) BIC = -26.1	3	TRUE	A_endothelial_reference = 2.1914;A_microglia_reference = 2.1033;A_oligodendrocyte_reference = 2.1671	NA	NA	0.0302285	0.0354352	0.0284245
Cs	citrate synthase	10	127774888	127799535	1	D3	ENSMUSG00000005683	FALSE	(ENSMUSG00000005683 ~ A_neuron_reference) BIC = -87.98;(ENSMUSG00000005683 ~ A_endothelial_reference + A_neuron_reference) BIC = -86.31	2	TRUE	A_neuron_reference = 3.5023;A_endothelial_reference = 1.2084	NA	0.00046118	NA	NA	0.226887
Ampd3	adenosine monophosphate deaminase 3	7	117911720	117955919	1	F1	ENSMUSG00000005686	FALSE	(ENSMUSG00000005686 ~ A_astrocyte_reference + A_oligodendrocyte_reference) BIC = -37.22;(ENSMUSG00000005686 ~ A_oligodendrocyte_reference) BIC = -36.7;(ENSMUSG00000005686 ~ A_astrocyte_reference + A_microglia_reference + A_oligodendrocyte_reference) BIC = -36.61;(ENSMUSG00000005686 ~ A_astrocyte_reference + A_endothelial_reference + A_microglia_reference + A_oligodendrocyte_reference) BIC = -35.28	4	TRUE	A_astrocyte_reference = 1.9927;A_oligodendrocyte_reference = 4.2005;A_microglia_reference = 1.5755;A_endothelial_reference = 1.2736	0.046299	NA	2.663e-05	0.115147	0.20281
Bcas2	breast carcinoma amplified sequence 2	3	102975578	102983089	1	F2.2	ENSMUSG00000005687	FALSE	(ENSMUSG00000005687 ~ A_astrocyte_reference) BIC = -62.97;(ENSMUSG00000005687 ~ A_astrocyte_reference + A_neuron_reference) BIC = -61.97;(ENSMUSG00000005687 ~ A_astrocyte_reference + A_neuron_reference + A_oligodendrocyte_reference) BIC = -61.46	3	TRUE	A_astrocyte_reference = 2.3252;A_neuron_reference = 1.566;A_oligodendrocyte_reference = 1.5458	0.0200609	0.117346	0.122144	NA	NA
Ctcf	CCCTC-binding factor	8	108160468	108206822	1	D3	ENSMUSG00000005698	FALSE	(ENSMUSG00000005698 ~ 1) BIC = -89.37;(ENSMUSG00000005698 ~ A_endothelial_reference) BIC = -88.45;(ENSMUSG00000005698 ~ A_endothelial_reference + A_oligodendrocyte_reference) BIC = -88.29;(ENSMUSG00000005698 ~ A_endothelial_reference + A_microglia_reference + A_oligodendrocyte_reference) BIC = -87.96;(ENSMUSG00000005698 ~ A_neuron_reference) BIC = -87.91;(ENSMUSG00000005698 ~ A_microglia_referenc…	8	TRUE	A_endothelial_reference = 1.6715;A_oligodendrocyte_reference = 1.6404;A_microglia_reference = 1.6833;A_neuron_reference = 1.5378	NA	0.12409	0.100916	0.0923123	0.0946265
Pard6a	par-6 (partitioning defective 6,) homolog alpha (C. elegans)	8	108225054	108227393	1	D3	ENSMUSG00000005699	FALSE	(ENSMUSG00000005699 ~ A_oligodendrocyte_reference) BIC = -44.39	1	FALSE	NA	NA	NA	0.000132901	NA	NA
Agrp	agouti related protein	8	108090600	108092198	-1	D3	ENSMUSG00000005705	FALSE	(ENSMUSG00000005705 ~ 1) BIC = 79.81;(ENSMUSG00000005705 ~ A_astrocyte_reference) BIC = 80.01	2	TRUE	A_astrocyte_reference = 1.7015	0.0888487	NA	NA	NA	NA
Pvalb	parvalbumin	15	78021544	78036830	-1	E1	ENSMUSG00000005716	FALSE	(ENSMUSG00000005716 ~ A_endothelial_reference + A_neuron_reference + A_oligodendrocyte_reference) BIC = 45.71;(ENSMUSG00000005716 ~ A_astrocyte_reference + A_endothelial_reference + A_oligodendrocyte_reference) BIC = 47.09;(ENSMUSG00000005716 ~ A_neuron_reference) BIC = 47.1;(ENSMUSG00000005716 ~ A_endothelial_reference + A_microglia_reference + A_neuron_reference + A_oligodendrocyte_reference) B…	5	TRUE	A_endothelial_reference = 2.2233;A_neuron_reference = 2.3118;A_oligodendrocyte_reference = 2.2107;A_astrocyte_reference = 2.0221;A_microglia_reference = 1.2468	0.04317	0.0207914	0.027057	0.212473	0.0261943
Tfap4	transcription factor AP4	16	4544661	4559720	-1	A1	ENSMUSG00000005718	FALSE	(ENSMUSG00000005718 ~ A_microglia_reference + A_neuron_reference) BIC = -4.83;(ENSMUSG00000005718 ~ 1) BIC = -4.06;(ENSMUSG00000005718 ~ A_endothelial_reference + A_microglia_reference + A_neuron_reference) BIC = -3.99;(ENSMUSG00000005718 ~ A_astrocyte_reference + A_microglia_reference) BIC = -3.84	4	TRUE	A_microglia_reference = 2.4203;A_neuron_reference = 2.328;A_endothelial_reference = 1.4486;A_astrocyte_reference = 2.0151	0.0438923	0.0199143	NA	0.0155086	0.147448
Ranbp1	RAN binding protein 1	16	18239877	18248825	-1	A3	ENSMUSG00000005732	FALSE	(ENSMUSG00000005732 ~ A_astrocyte_reference + A_neuron_reference + A_oligodendrocyte_reference) BIC = -62.57	1	FALSE	NA	0.0673105	0.0318787	0.0120713	NA	NA
Rfx5	regulatory factor X, 5 (influences HLA class II expression)	3	94757997	94765483	1	F2.1	ENSMUSG00000005774	FALSE	(ENSMUSG00000005774 ~ A_microglia_reference + A_oligodendrocyte_reference) BIC = -45.53;(ENSMUSG00000005774 ~ A_microglia_reference + A_neuron_reference) BIC = -44.77;(ENSMUSG00000005774 ~ A_microglia_reference + A_neuron_reference + A_oligodendrocyte_reference) BIC = -43.89	3	TRUE	A_microglia_reference = 3.2026;A_oligodendrocyte_reference = 2.2097;A_neuron_reference = 1.8323	NA	0.0669031	0.0271244	0.00136198	NA
Psmb4	proteasome (prosome, macropain) subunit, beta type 4	3	94688015	94690883	-1	F2.1	ENSMUSG00000005779	FALSE	(ENSMUSG00000005779 ~ A_neuron_reference + A_oligodendrocyte_reference) BIC = -49.75	1	FALSE	NA	NA	0.963551	0.000366789	NA	NA
Slc30a4	solute carrier family 30 (zinc transporter), member 4	2	122506969	122528399	-1	E5	ENSMUSG00000005802	FALSE	(ENSMUSG00000005802 ~ A_neuron_reference) BIC = -53.95;(ENSMUSG00000005802 ~ A_microglia_reference + A_neuron_reference) BIC = -53.35;(ENSMUSG00000005802 ~ A_oligodendrocyte_reference) BIC = -52.33;(ENSMUSG00000005802 ~ A_neuron_reference + A_oligodendrocyte_reference) BIC = -52.32	4	TRUE	A_neuron_reference = 2.6895;A_microglia_reference = 1.5522;A_oligodendrocyte_reference = 1.7555	NA	0.00715629	0.079166	0.120611	NA
Sqrdl	sulfide quinone reductase-like (yeast)	2	122590973	122635305	1	E5	ENSMUSG00000005803	FALSE	(ENSMUSG00000005803 ~ A_endothelial_reference + A_microglia_reference) BIC = -24.14;(ENSMUSG00000005803 ~ A_microglia_reference + A_neuron_reference + A_oligodendrocyte_reference) BIC = -23.27;(ENSMUSG00000005803 ~ A_endothelial_reference + A_microglia_reference + A_neuron_reference + A_oligodendrocyte_reference) BIC = -22.74	3	TRUE	A_endothelial_reference = 1.9443;A_microglia_reference = 3.4382;A_neuron_reference = 2.3093;A_oligodendrocyte_reference = 2.1361	NA	0.0209284	0.0326739	0.0005856	0.0518645
Pldn	pallidin	2	122564239	122575211	1	E5	ENSMUSG00000005804	FALSE	(ENSMUSG00000005804 ~ A_endothelial_reference + A_oligodendrocyte_reference) BIC = -73.28;(ENSMUSG00000005804 ~ A_endothelial_reference + A_neuron_reference + A_oligodendrocyte_reference) BIC = -71.86	2	TRUE	A_endothelial_reference = 2.4699;A_oligodendrocyte_reference = 2.5179;A_neuron_reference = 1.2721	NA	0.203336	0.0118048	NA	0.0135157
Metap1	methionyl aminopeptidase 1	3	138121924	138152346	-1	G3	ENSMUSG00000005813	FALSE	(ENSMUSG00000005813 ~ A_neuron_reference) BIC = -82.94;(ENSMUSG00000005813 ~ A_endothelial_reference + A_neuron_reference) BIC = -82.63;(ENSMUSG00000005813 ~ A_microglia_reference + A_neuron_reference) BIC = -82.49;(ENSMUSG00000005813 ~ A_astrocyte_reference + A_neuron_reference) BIC = -81.65;(ENSMUSG00000005813 ~ A_endothelial_reference + A_oligodendrocyte_reference) BIC = -81.49;(ENSMUSG0000000…	6	TRUE	A_neuron_reference = 3.3516;A_endothelial_reference = 1.6084;A_microglia_reference = 1.4449;A_astrocyte_reference = 1.3413;A_oligodendrocyte_reference = 3.6075	0.179822	0.00080344	0.00030913	0.148486	0.107757
Gpr108	G protein-coupled receptor 108	17	57374341	57387082	-1	D	ENSMUSG00000005823	FALSE	(ENSMUSG00000005823 ~ A_endothelial_reference + A_neuron_reference) BIC = -51.73;(ENSMUSG00000005823 ~ A_neuron_reference) BIC = -50.13	2	TRUE	A_endothelial_reference = 2.1144;A_neuron_reference = 3.5749	NA	0.00035034	NA	NA	0.0344805
Rsl1d1	ribosomal L1 domain containing 1	16	11193063	11203424	-1	A1	ENSMUSG00000005846	FALSE	(ENSMUSG00000005846 ~ 1) BIC = -67.3;(ENSMUSG00000005846 ~ A_oligodendrocyte_reference) BIC = -66.89;(ENSMUSG00000005846 ~ A_astrocyte_reference) BIC = -65.91	3	TRUE	A_oligodendrocyte_reference = 1.641;A_astrocyte_reference = 1.3343	0.182091	NA	0.100787	NA	NA
Apc	adenomatosis polyposis coli	18	34380578	34481843	1	B1	ENSMUSG00000005871	FALSE	(ENSMUSG00000005871 ~ A_endothelial_reference + A_neuron_reference) BIC = -24.22	1	FALSE	NA	NA	3.34778e-05	NA	NA	0.0053938
Reep5	receptor accessory protein 5	18	34504543	34533069	-1	B1	ENSMUSG00000005873	FALSE	(ENSMUSG00000005873 ~ A_microglia_reference) BIC = -79.65;(ENSMUSG00000005873 ~ A_microglia_reference + A_neuron_reference) BIC = -79.03;(ENSMUSG00000005873 ~ A_neuron_reference) BIC = -78.73;(ENSMUSG00000005873 ~ A_endothelial_reference + A_neuron_reference) BIC = -77.95;(ENSMUSG00000005873 ~ A_astrocyte_reference) BIC = -77.85	5	TRUE	A_microglia_reference = 2.2279;A_neuron_reference = 2.0169;A_endothelial_reference = 1.497;A_astrocyte_reference = 2.5837	0.00977519	0.0437054	NA	0.0258843	0.134384
Ergic3	ERGIC and golgi 3	2	155833781	155844015	1	H1	ENSMUSG00000005881	FALSE	(ENSMUSG00000005881 ~ A_neuron_reference + A_oligodendrocyte_reference) BIC = -53.62	1	FALSE	NA	NA	0.69227	0.00159832	NA	NA
Uqcc	ubiquinol-cytochrome c reductase complex chaperone, CBP3 homolog (yeast)	2	155672630	155756046	-1	H1	ENSMUSG00000005882	FALSE	(ENSMUSG00000005882 ~ A_neuron_reference) BIC = -72.02	1	FALSE	NA	NA	1.05572e-09	NA	NA	NA
Ncoa2	nuclear receptor coactivator 2	1	13129186	13364164	-1	A3	ENSMUSG00000005886	FALSE	(ENSMUSG00000005886 ~ A_endothelial_reference) BIC = -40.17;(ENSMUSG00000005886 ~ A_endothelial_reference + A_oligodendrocyte_reference) BIC = -38.99;(ENSMUSG00000005886 ~ A_endothelial_reference + A_neuron_reference + A_oligodendrocyte_reference) BIC = -38.72	3	TRUE	A_endothelial_reference = 2.582;A_oligodendrocyte_reference = 1.3952;A_neuron_reference = 1.6136	NA	0.10662	0.16295	NA	0.00982207
Trh	thyrotropin releasing hormone	6	92192055	92194644	-1	D1	ENSMUSG00000005892	FALSE	(ENSMUSG00000005892 ~ A_neuron_reference) BIC = 72.48;(ENSMUSG00000005892 ~ A_microglia_reference + A_neuron_reference) BIC = 74.38	2	TRUE	A_neuron_reference = 6.1888;A_microglia_reference = 1.1261	NA	0	NA	0.260131	NA
Nr2c2	nuclear receptor subfamily 2, group C, member 2	6	92041384	92123051	1	D1	ENSMUSG00000005893	FALSE	(ENSMUSG00000005893 ~ A_endothelial_reference + A_neuron_reference) BIC = -69.15;(ENSMUSG00000005893 ~ A_endothelial_reference + A_neuron_reference + A_oligodendrocyte_reference) BIC = -68.5	2	TRUE	A_endothelial_reference = 2.5715;A_neuron_reference = 2.4152;A_oligodendrocyte_reference = 1.5056	NA	0.0157275	0.132166	NA	0.0101262
Nr2c1	nuclear receptor subfamily 2, group C, member 1	10	93610768	93659956	1	C2	ENSMUSG00000005897	FALSE	(ENSMUSG00000005897 ~ A_oligodendrocyte_reference) BIC = -54.81;(ENSMUSG00000005897 ~ A_microglia_reference + A_oligodendrocyte_reference) BIC = -54.19;(ENSMUSG00000005897 ~ A_neuron_reference) BIC = -53.55	3	TRUE	A_oligodendrocyte_reference = 3.012;A_microglia_reference = 1.5473;A_neuron_reference = 2.8951	NA	0.0037898	0.00259522	0.121799	NA
Smpd4	sphingomyelin phosphodiesterase 4	16	17619447	17644921	1	A3	ENSMUSG00000005899	FALSE	(ENSMUSG00000005899 ~ A_astrocyte_reference + A_neuron_reference) BIC = -35.46;(ENSMUSG00000005899 ~ A_neuron_reference) BIC = -34.63;(ENSMUSG00000005899 ~ A_microglia_reference + A_neuron_reference) BIC = -34.52	3	TRUE	A_astrocyte_reference = 1.9321;A_neuron_reference = 3.6489;A_microglia_reference = 1.6901	0.0533432	0.00026337	NA	0.0910128	NA
Pex1	peroxisomal biogenesis factor 1	5	3596066	3637232	1	A1	ENSMUSG00000005907	FALSE	(ENSMUSG00000005907 ~ A_endothelial_reference) BIC = -48.93;(ENSMUSG00000005907 ~ A_neuron_reference + A_oligodendrocyte_reference) BIC = -47.67;(ENSMUSG00000005907 ~ A_endothelial_reference + A_microglia_reference + A_oligodendrocyte_reference) BIC = -47.59;(ENSMUSG00000005907 ~ A_endothelial_reference + A_neuron_reference + A_oligodendrocyte_reference) BIC = -46.97;(ENSMUSG00000005907 ~ A_endot…	5	TRUE	A_endothelial_reference = 2.1032;A_neuron_reference = 1.9586;A_oligodendrocyte_reference = 1.5723;A_microglia_reference = 1.8474	NA	0.050163	0.115876	0.0646949	0.0354511
Otx1	orthodenticle homolog 1 (Drosophila)	11	21894767	21902900	-1	A3.2	ENSMUSG00000005917	FALSE	(ENSMUSG00000005917 ~ A_endothelial_reference + A_neuron_reference) BIC = -9.98;(ENSMUSG00000005917 ~ A_endothelial_reference + A_microglia_reference + A_neuron_reference) BIC = -9.17;(ENSMUSG00000005917 ~ A_astrocyte_reference + A_endothelial_reference + A_neuron_reference) BIC = -8.15;(ENSMUSG00000005917 ~ A_astrocyte_reference + A_endothelial_reference) BIC = -8.01	4	TRUE	A_endothelial_reference = 2.6211;A_neuron_reference = 2.6262;A_microglia_reference = 1.462;A_astrocyte_reference = 1.6304	0.103018	0.00863316	NA	0.143743	0.00876355
Kctd20	potassium channel tetramerisation domain containing 20	17	29088895	29106494	1	A3.3	ENSMUSG00000005936	FALSE	(ENSMUSG00000005936 ~ A_neuron_reference) BIC = -88.48	1	FALSE	NA	NA	0.0182257	NA	NA	NA
Ctns	cystinosis, nephropathic	11	72997098	73012544	-1	B4	ENSMUSG00000005949	FALSE	(ENSMUSG00000005949 ~ 1) BIC = -75.58	1	FALSE	NA	NA	NA	NA	NA	NA
P2rx5	purinergic receptor P2X, ligand-gated ion channel, 5	11	72973923	72986187	1	B4	ENSMUSG00000005950	FALSE	(ENSMUSG00000005950 ~ A_oligodendrocyte_reference) BIC = 29.9;(ENSMUSG00000005950 ~ A_endothelial_reference + A_oligodendrocyte_reference) BIC = 30.88	2	TRUE	A_oligodendrocyte_reference = 3.6096;A_endothelial_reference = 1.4406	NA	NA	0.00030665	NA	0.149711
Shpk	sedoheptulokinase	11	73012962	73038013	1	B4	ENSMUSG00000005951	FALSE	(ENSMUSG00000005951 ~ A_microglia_reference) BIC = -21.36;(ENSMUSG00000005951 ~ A_microglia_reference + A_neuron_reference) BIC = -19.71;(ENSMUSG00000005951 ~ 1) BIC = -19.65	3	TRUE	A_microglia_reference = 2.1817;A_neuron_reference = 1.2148	NA	0.224427	NA	0.0291281	NA
Ephb3	Eph receptor B3	16	21204828	21223378	1	B1	ENSMUSG00000005958	FALSE	(ENSMUSG00000005958 ~ A_astrocyte_reference + A_endothelial_reference + A_oligodendrocyte_reference) BIC = -10.1;(ENSMUSG00000005958 ~ A_astrocyte_reference + A_endothelial_reference) BIC = -8.92;(ENSMUSG00000005958 ~ A_astrocyte_reference + A_oligodendrocyte_reference) BIC = -8.41;(ENSMUSG00000005958 ~ A_astrocyte_reference + A_endothelial_reference + A_neuron_reference) BIC = -8.25	4	TRUE	A_astrocyte_reference = 2.6664;A_endothelial_reference = 2.2105;A_oligodendrocyte_reference = 2.0267;A_neuron_reference = 1.5002	0.00766649	0.133575	0.0426894	NA	0.0270728
Tuft1	tuftelin 1	3	94416679	94462794	-1	F2.1	ENSMUSG00000005968	FALSE	(ENSMUSG00000005968 ~ A_neuron_reference) BIC = -0.59;(ENSMUSG00000005968 ~ A_neuron_reference + A_oligodendrocyte_reference) BIC = -0.32	2	TRUE	A_neuron_reference = 2.8239;A_oligodendrocyte_reference = 1.6446	NA	0.00474404	0.100053	NA	NA
Rcn1	reticulocalbin 1	2	105226448	105239476	-1	E3	ENSMUSG00000005973	FALSE	(ENSMUSG00000005973 ~ A_neuron_reference) BIC = -0.55;(ENSMUSG00000005973 ~ A_oligodendrocyte_reference) BIC = 0.06	2	TRUE	A_neuron_reference = 2.714;A_oligodendrocyte_reference = 2.5896	NA	0.00664773	0.00960776	NA	NA
Trap1	TNF receptor-associated protein 1	16	4039971	4078410	-1	A1	ENSMUSG00000005981	FALSE	(ENSMUSG00000005981 ~ A_neuron_reference) BIC = -92.93	1	FALSE	NA	NA	0.000218961	NA	NA	NA
Nat15	N-acetyltransferase 15 (GCN5-related, putative)	16	3872375	3904770	1	A1	ENSMUSG00000005982	FALSE	(ENSMUSG00000005982 ~ A_neuron_reference + A_oligodendrocyte_reference) BIC = -74.75;(ENSMUSG00000005982 ~ 1) BIC = -74.32;(ENSMUSG00000005982 ~ A_endothelial_reference) BIC = -72.88	3	TRUE	A_neuron_reference = 2.3082;A_oligodendrocyte_reference = 2.5316;A_endothelial_reference = 1.3183	NA	0.0209888	0.0113531	NA	0.187392
1700037C18Rik	RIKEN cDNA 1700037C18 gene	16	3895179	3908689	-1	A1	ENSMUSG00000005983	FALSE	(ENSMUSG00000005983 ~ A_oligodendrocyte_reference) BIC = -11.64	1	FALSE	NA	NA	NA	0.000326615	NA	NA
Ankrd13d	ankyrin repeat domain 13 family, member D	19	4270180	4283137	-1	A	ENSMUSG00000005986	FALSE	(ENSMUSG00000005986 ~ A_microglia_reference + A_neuron_reference) BIC = -49.11	1	FALSE	NA	NA	0.00566163	NA	5.26045e-07	NA
Tpr	translocated promoter region	1	152239968	152297065	1	G1	ENSMUSG00000006005	FALSE	(ENSMUSG00000006005 ~ A_endothelial_reference + A_oligodendrocyte_reference) BIC = -72.53;(ENSMUSG00000006005 ~ A_endothelial_reference + A_neuron_reference + A_oligodendrocyte_reference) BIC = -72.51	2	TRUE	A_endothelial_reference = 3.0128;A_oligodendrocyte_reference = 1.9712;A_neuron_reference = 1.6777	NA	0.0934061	0.0486972	NA	0.00258879
BC003331	cDNA sequence BC003331	1	152208435	152240210	-1	G1	ENSMUSG00000006010	FALSE	(ENSMUSG00000006010 ~ A_microglia_reference) BIC = -71.66	1	FALSE	NA	NA	NA	NA	0.017818	NA
Prg4	proteoglycan 4 (megakaryocyte stimulating factor, articular superficial zone protein)	1	152296542	152313295	-1	G1	ENSMUSG00000006014	FALSE	(ENSMUSG00000006014 ~ A_microglia_reference) BIC = 64.16;(ENSMUSG00000006014 ~ A_endothelial_reference + A_microglia_reference) BIC = 66.11;(ENSMUSG00000006014 ~ A_microglia_reference + A_neuron_reference + A_oligodendrocyte_reference) BIC = 66.15	3	TRUE	A_microglia_reference = 4.6398;A_endothelial_reference = 1.1066;A_neuron_reference = 1.6911;A_oligodendrocyte_reference = 1.9737	NA	0.0908272	0.0484208	3.49e-06	0.268455
Dhx34	DEAH (Asp-Glu-Ala-His) box polypeptide 34	7	16782496	16807386	-1	A2	ENSMUSG00000006019	FALSE	(ENSMUSG00000006019 ~ A_microglia_reference) BIC = -45.27;(ENSMUSG00000006019 ~ A_endothelial_reference + A_microglia_reference) BIC = -43.55	2	TRUE	A_microglia_reference = 3.2072;A_endothelial_reference = 1.1914	NA	NA	NA	0.00134041	0.233503
Kptn	kaptin	7	16705244	16712865	1	A2	ENSMUSG00000006021	FALSE	(ENSMUSG00000006021 ~ A_neuron_reference + A_oligodendrocyte_reference) BIC = -61.07;(ENSMUSG00000006021 ~ A_endothelial_reference + A_oligodendrocyte_reference) BIC = -60.59;(ENSMUSG00000006021 ~ A_endothelial_reference + A_neuron_reference + A_oligodendrocyte_reference) BIC = -60.34;(ENSMUSG00000006021 ~ A_astrocyte_reference + A_neuron_reference + A_oligodendrocyte_reference) BIC = -60.13;(ENS…	6	TRUE	A_neuron_reference = 1.9252;A_oligodendrocyte_reference = 2.0995;A_endothelial_reference = 1.8078;A_astrocyte_reference = 1.4213	0.155234	0.0541994	0.0357698	NA	0.0706411
Napa	N-ethylmaleimide sensitive fusion protein attachment protein alpha	7	16683807	16703324	1	A2	ENSMUSG00000006024	FALSE	(ENSMUSG00000006024 ~ A_endothelial_reference) BIC = -69.99;(ENSMUSG00000006024 ~ A_endothelial_reference + A_neuron_reference + A_oligodendrocyte_reference) BIC = -69.86;(ENSMUSG00000006024 ~ A_endothelial_reference + A_neuron_reference) BIC = -68.82;(ENSMUSG00000006024 ~ A_astrocyte_reference + A_endothelial_reference + A_neuron_reference + A_oligodendrocyte_reference) BIC = -68.42;(ENSMUSG0000…	5	TRUE	A_endothelial_reference = 2.4023;A_neuron_reference = 1.7665;A_oligodendrocyte_reference = 1.8783;A_astrocyte_reference = 1.2371;A_microglia_reference = 1.1443	0.216059	0.0773089	0.0603456	0.252489	0.0162902
Sra1	steroid receptor RNA activator 1	18	36826335	36830850	-1	B2	ENSMUSG00000006050	FALSE	(ENSMUSG00000006050 ~ A_endothelial_reference) BIC = -66.17;(ENSMUSG00000006050 ~ A_endothelial_reference + A_neuron_reference) BIC = -64.19	2	TRUE	A_endothelial_reference = 3.686;A_neuron_reference = 1.0945	NA	0.273748	NA	NA	0.00022777
Atp5g1	ATP synthase, H+ transporting, mitochondrial F0 complex, subunit c1 (subunit 9)	11	95930166	95936984	-1	D	ENSMUSG00000006057	FALSE	(ENSMUSG00000006057 ~ A_neuron_reference + A_oligodendrocyte_reference) BIC = -53.02;(ENSMUSG00000006057 ~ A_endothelial_reference + A_neuron_reference + A_oligodendrocyte_reference) BIC = -51.67	2	TRUE	A_neuron_reference = 3.2659;A_oligodendrocyte_reference = 2.8389;A_endothelial_reference = 1.2948	NA	0.00109109	0.0045271	NA	0.1954
Snf8	SNF8, ESCRT-II complex subunit, homolog (S. cerevisiae)	11	95896199	95908744	1	D	ENSMUSG00000006058	FALSE	(ENSMUSG00000006058 ~ A_neuron_reference + A_oligodendrocyte_reference) BIC = -52.98;(ENSMUSG00000006058 ~ A_endothelial_reference + A_neuron_reference + A_oligodendrocyte_reference) BIC = -51.73;(ENSMUSG00000006058 ~ A_endothelial_reference) BIC = -51.39	3	TRUE	A_neuron_reference = 2.3049;A_oligodendrocyte_reference = 2.8976;A_endothelial_reference = 1.5993	NA	0.0211741	0.00376012	NA	0.109745
Tbcb	tubulin folding cofactor B	7	31009150	31017291	-1	B1	ENSMUSG00000006095	FALSE	(ENSMUSG00000006095 ~ A_oligodendrocyte_reference) BIC = -60.95;(ENSMUSG00000006095 ~ A_microglia_reference + A_oligodendrocyte_reference) BIC = -59.72	2	TRUE	A_oligodendrocyte_reference = 4.307;A_microglia_reference = 1.3613	NA	NA	1.655e-05	0.173411	NA
Inpp5k	inositol polyphosphate 5-phosphatase K	11	75444490	75462373	1	B5	ENSMUSG00000006127	FALSE	(ENSMUSG00000006127 ~ A_astrocyte_reference + A_neuron_reference) BIC = -73.45;(ENSMUSG00000006127 ~ 1) BIC = -73.38;(ENSMUSG00000006127 ~ A_astrocyte_reference + A_oligodendrocyte_reference) BIC = -72.64;(ENSMUSG00000006127 ~ A_microglia_reference + A_oligodendrocyte_reference) BIC = -72.51;(ENSMUSG00000006127 ~ A_astrocyte_reference + A_endothelial_reference + A_oligodendrocyte_reference) BIC =…	5	TRUE	A_astrocyte_reference = 2.122;A_neuron_reference = 2.338;A_oligodendrocyte_reference = 2.1518;A_microglia_reference = 2.0422;A_endothelial_reference = 1.4894	0.0338381	0.0193886	0.0314102	0.0411297	0.136374
Crkl	v-crk sarcoma virus CT10 oncogene homolog (avian)-like	16	17452080	17486348	1	A3	ENSMUSG00000006134	FALSE	(ENSMUSG00000006134 ~ A_oligodendrocyte_reference) BIC = -65.56;(ENSMUSG00000006134 ~ A_endothelial_reference + A_oligodendrocyte_reference) BIC = -64.59	2	TRUE	A_oligodendrocyte_reference = 3.5406;A_endothelial_reference = 1.4433	NA	NA	0.0003992	NA	0.148937
Eps8l1	EPS8-like 1	7	4412276	4431006	1	A1	ENSMUSG00000006154	FALSE	(ENSMUSG00000006154 ~ A_endothelial_reference) BIC = 87.54;(ENSMUSG00000006154 ~ 1) BIC = 88.74	2	TRUE	A_endothelial_reference = 2.0622	NA	NA	NA	NA	0.0391868
Clint1	clathrin interactor 1	11	45665507	45724127	1	B1.1	ENSMUSG00000006169	FALSE	(ENSMUSG00000006169 ~ A_endothelial_reference) BIC = -88.63;(ENSMUSG00000006169 ~ A_astrocyte_reference + A_endothelial_reference + A_neuron_reference) BIC = -87.26;(ENSMUSG00000006169 ~ A_endothelial_reference + A_microglia_reference) BIC = -87.03;(ENSMUSG00000006169 ~ A_astrocyte_reference + A_endothelial_reference) BIC = -87	4	TRUE	A_endothelial_reference = 3.1316;A_astrocyte_reference = 1.4113;A_neuron_reference = 1.7514;A_microglia_reference = 1.2346	0.158169	0.0798734	NA	0.216978	0.00173862
Prss16	protease, serine, 16 (thymus)	13	22094045	22101611	-1	A3.1	ENSMUSG00000006179	FALSE	(ENSMUSG00000006179 ~ A_neuron_reference) BIC = 82.98;(ENSMUSG00000006179 ~ A_oligodendrocyte_reference) BIC = 83.62;(ENSMUSG00000006179 ~ A_astrocyte_reference) BIC = 84.51;(ENSMUSG00000006179 ~ A_astrocyte_reference + A_oligodendrocyte_reference) BIC = 84.85	4	TRUE	A_neuron_reference = 3.2529;A_oligodendrocyte_reference = 2.27;A_astrocyte_reference = 1.8526	0.0639428	0.00114219	0.0232092	NA	NA
Cdkal1	CDK5 regulatory subunit associated protein 1-like 1	13	29283615	29947543	-1	A3.2	ENSMUSG00000006191	FALSE	(ENSMUSG00000006191 ~ A_astrocyte_reference + A_endothelial_reference + A_microglia_reference) BIC = -61.62;(ENSMUSG00000006191 ~ A_astrocyte_reference + A_microglia_reference) BIC = -61.17;(ENSMUSG00000006191 ~ A_astrocyte_reference) BIC = -60.14	3	TRUE	A_astrocyte_reference = 2.3919;A_endothelial_reference = 1.7992;A_microglia_reference = 2.1557	0.0167636	NA	NA	0.0311049	0.0719905
Htra1	HtrA serine peptidase 1	7	138079625	138129174	1	F3	ENSMUSG00000006205	FALSE	(ENSMUSG00000006205 ~ A_microglia_reference) BIC = -25.46;(ENSMUSG00000006205 ~ A_astrocyte_reference) BIC = -23.66	2	TRUE	A_microglia_reference = 2.3751;A_astrocyte_reference = 1.9528	0.0508449	NA	NA	0.0175444	NA
Zbtb17	zinc finger and BTB domain containing 17	4	141000569	141023845	1	E1	ENSMUSG00000006215	FALSE	(ENSMUSG00000006215 ~ A_endothelial_reference) BIC = -59.01;(ENSMUSG00000006215 ~ 1) BIC = -57.6	2	TRUE	A_endothelial_reference = 2.1107	NA	NA	NA	NA	0.0347947
Fam131c	family with sequence similarity 131, member C	4	140924135	140940090	1	E1	ENSMUSG00000006218	FALSE	(ENSMUSG00000006218 ~ A_neuron_reference) BIC = 16.12	1	FALSE	NA	NA	1.02065e-08	NA	NA	NA
Fblim1	filamin binding LIM protein 1	4	141131977	141162011	-1	E1	ENSMUSG00000006219	FALSE	(ENSMUSG00000006219 ~ A_microglia_reference + A_neuron_reference) BIC = 47.72	1	FALSE	NA	NA	0.000118172	NA	3.65645e-06	NA
Epor	erythropoietin receptor	9	21763343	21768020	-1	A3	ENSMUSG00000006235	FALSE	(ENSMUSG00000006235 ~ A_neuron_reference + A_oligodendrocyte_reference) BIC = -16.24;(ENSMUSG00000006235 ~ A_endothelial_reference + A_oligodendrocyte_reference) BIC = -15.84;(ENSMUSG00000006235 ~ A_oligodendrocyte_reference) BIC = -15.44;(ENSMUSG00000006235 ~ A_endothelial_reference + A_neuron_reference + A_oligodendrocyte_reference) BIC = -14.88;(ENSMUSG00000006235 ~ A_microglia_reference + A_n…	6	TRUE	A_neuron_reference = 1.7957;A_oligodendrocyte_reference = 2.7483;A_endothelial_reference = 1.574;A_microglia_reference = 1.1472;A_astrocyte_reference = 1.1101	0.26695	0.0725347	0.00598995	0.251317	0.115497
Ccdc159	coiled-coil domain containing 159	9	21731915	21740316	1	A3	ENSMUSG00000006241	FALSE	(ENSMUSG00000006241 ~ A_astrocyte_reference + A_microglia_reference) BIC = -29.69;(ENSMUSG00000006241 ~ A_astrocyte_reference + A_microglia_reference + A_oligodendrocyte_reference) BIC = -29;(ENSMUSG00000006241 ~ A_astrocyte_reference + A_endothelial_reference + A_microglia_reference + A_oligodendrocyte_reference) BIC = -28.44;(ENSMUSG00000006241 ~ A_astrocyte_reference + A_endothelial_reference …	4	TRUE	A_astrocyte_reference = 2.4096;A_microglia_reference = 2.5101;A_oligodendrocyte_reference = 1.588;A_endothelial_reference = 1.3549	0.0159693	NA	0.112291	0.0120692	0.175458
Mob1b	MOB kinase activator 1B	5	89149880	89191083	1	E1	ENSMUSG00000006262	FALSE	(ENSMUSG00000006262 ~ A_microglia_reference) BIC = -50.47;(ENSMUSG00000006262 ~ A_endothelial_reference + A_microglia_reference) BIC = -48.79;(ENSMUSG00000006262 ~ A_oligodendrocyte_reference) BIC = -48.54	3	TRUE	A_microglia_reference = 2.1587;A_endothelial_reference = 1.2049;A_oligodendrocyte_reference = 1.805	NA	NA	0.0710747	0.0308753	0.228255
Vax1	ventral anterior homeobox containing gene 1	19	59240677	59245626	-1	D3	ENSMUSG00000006270	FALSE	(ENSMUSG00000006270 ~ A_astrocyte_reference + A_oligodendrocyte_reference) BIC = 40.87;(ENSMUSG00000006270 ~ A_astrocyte_reference) BIC = 41.19	2	TRUE	A_astrocyte_reference = 2.337;A_oligodendrocyte_reference = 1.8022	0.0194369	NA	0.0715106	NA	NA
Atp6v1b2	ATPase, H+ transporting, lysosomal V1 subunit B2	8	71612545	71637610	1	B3.3	ENSMUSG00000006273	FALSE	(ENSMUSG00000006273 ~ A_oligodendrocyte_reference) BIC = -88.65;(ENSMUSG00000006273 ~ A_neuron_reference) BIC = -87.31	2	TRUE	A_oligodendrocyte_reference = 2.3878;A_neuron_reference = 2.0804	NA	0.0374855	0.0169515	NA	NA
Eps15l1	epidermal growth factor receptor pathway substrate 15-like 1	8	74864900	74945373	-1	B3.3	ENSMUSG00000006276	FALSE	(ENSMUSG00000006276 ~ A_microglia_reference + A_oligodendrocyte_reference) BIC = -59.59;(ENSMUSG00000006276 ~ A_endothelial_reference + A_microglia_reference + A_oligodendrocyte_reference) BIC = -57.94	2	TRUE	A_microglia_reference = 4.2553;A_oligodendrocyte_reference = 3.2093;A_endothelial_reference = 1.1924	NA	NA	0.00133057	2.088e-05	0.23311
Tep1	telomerase associated protein 1	14	51443737	51490235	-1	C1	ENSMUSG00000006281	FALSE	(ENSMUSG00000006281 ~ A_neuron_reference) BIC = -20.68;(ENSMUSG00000006281 ~ A_neuron_reference + A_oligodendrocyte_reference) BIC = -19.3	2	TRUE	A_neuron_reference = 4.9934;A_oligodendrocyte_reference = 1.3092	NA	5.9e-07	0.19048	NA	NA
Ttc5	tetratricopeptide repeat domain 5	14	51385090	51405193	-1	C1	ENSMUSG00000006288	FALSE	(ENSMUSG00000006288 ~ A_astrocyte_reference + A_endothelial_reference + A_microglia_reference + A_oligodendrocyte_reference) BIC = -80.71;(ENSMUSG00000006288 ~ A_astrocyte_reference + A_microglia_reference + A_oligodendrocyte_reference) BIC = -80.07;(ENSMUSG00000006288 ~ A_endothelial_reference + A_oligodendrocyte_reference) BIC = -79.4;(ENSMUSG00000006288 ~ A_microglia_reference + A_neuron_refer…	5	TRUE	A_astrocyte_reference = 2.3712;A_endothelial_reference = 1.8349;A_microglia_reference = 2.1087;A_oligodendrocyte_reference = 3.5336;A_neuron_reference = 1.9508	0.0177286	0.0510846	0.00041	0.0349681	0.066517
Osgep	O-sialoglycoprotein endopeptidase	14	51526153	51544568	-1	C1	ENSMUSG00000006289	FALSE	(ENSMUSG00000006289 ~ 1) BIC = -61.85;(ENSMUSG00000006289 ~ A_endothelial_reference) BIC = -60.56	2	TRUE	A_endothelial_reference = 1.3648	NA	NA	NA	NA	0.172303
Aamp	angio-associated migratory protein	1	74326421	74331254	-1	C3	ENSMUSG00000006299	FALSE	(ENSMUSG00000006299 ~ A_neuron_reference + A_oligodendrocyte_reference) BIC = -72.11;(ENSMUSG00000006299 ~ A_astrocyte_reference + A_oligodendrocyte_reference) BIC = -70.62;(ENSMUSG00000006299 ~ A_oligodendrocyte_reference) BIC = -70.58;(ENSMUSG00000006299 ~ 1) BIC = -70.2	4	TRUE	A_neuron_reference = 2.0976;A_oligodendrocyte_reference = 2.0811;A_astrocyte_reference = 1.7284	0.0839143	0.0359415	0.037422	NA	NA
Tmbim1	transmembrane BAX inhibitor motif containing 1	1	74334821	74352196	-1	C3	ENSMUSG00000006301	FALSE	(ENSMUSG00000006301 ~ A_endothelial_reference + A_neuron_reference + A_oligodendrocyte_reference) BIC = -34.05	1	FALSE	NA	NA	1.75587e-10	0.0192697	NA	0.0223049
Arpc2	actin related protein 2/3 complex, subunit 2	1	74283071	74314783	1	C3	ENSMUSG00000006304	FALSE	(ENSMUSG00000006304 ~ A_oligodendrocyte_reference) BIC = -69.01;(ENSMUSG00000006304 ~ A_microglia_reference + A_oligodendrocyte_reference) BIC = -68.23	2	TRUE	A_oligodendrocyte_reference = 2.8254;A_microglia_reference = 1.501	NA	NA	0.00472217	0.133366	NA
Wbp7	WW domain binding protein 7	7	31353877	31373745	-1	B1	ENSMUSG00000006307	FALSE	(ENSMUSG00000006307 ~ A_microglia_reference + A_oligodendrocyte_reference) BIC = -45.38;(ENSMUSG00000006307 ~ A_endothelial_reference + A_microglia_reference + A_oligodendrocyte_reference) BIC = -44.11	2	TRUE	A_microglia_reference = 3.7;A_oligodendrocyte_reference = 2.8067;A_endothelial_reference = 1.3214	NA	NA	0.00500499	0.00021563	0.18638
Upk1a	uroplakin 1A	7	31388111	31397753	-1	B1	ENSMUSG00000006313	FALSE	(ENSMUSG00000006313 ~ A_endothelial_reference) BIC = 22.63;(ENSMUSG00000006313 ~ A_endothelial_reference + A_neuron_reference) BIC = 22.68;(ENSMUSG00000006313 ~ A_oligodendrocyte_reference) BIC = 22.73;(ENSMUSG00000006313 ~ A_microglia_reference) BIC = 22.82;(ENSMUSG00000006313 ~ 1) BIC = 23.27;(ENSMUSG00000006313 ~ A_endothelial_reference + A_oligodendrocyte_reference) BIC = 23.32;(ENSMUSG000000…	8	TRUE	A_endothelial_reference = 1.7707;A_neuron_reference = 1.6564;A_oligodendrocyte_reference = 1.7091;A_microglia_reference = 1.6905	NA	0.0976425	0.0874254	0.0909386	0.0766125
Tmem147	transmembrane protein 147	7	31512720	31514553	-1	B1	ENSMUSG00000006315	FALSE	(ENSMUSG00000006315 ~ A_endothelial_reference + A_neuron_reference + A_oligodendrocyte_reference) BIC = -58.17;(ENSMUSG00000006315 ~ A_neuron_reference + A_oligodendrocyte_reference) BIC = -57.68	2	TRUE	A_endothelial_reference = 1.8094;A_neuron_reference = 3.0656;A_oligodendrocyte_reference = 3.0362	NA	0.00217265	0.00239581	NA	0.0703845
Rps9	ribosomal protein S9	7	3655595	3658503	1	A1	ENSMUSG00000006333	FALSE	(ENSMUSG00000006333 ~ A_endothelial_reference + A_neuron_reference) BIC = -45.02;(ENSMUSG00000006333 ~ A_endothelial_reference + A_neuron_reference + A_oligodendrocyte_reference) BIC = -44.93;(ENSMUSG00000006333 ~ A_endothelial_reference + A_microglia_reference + A_neuron_reference + A_oligodendrocyte_reference) BIC = -43.17	3	TRUE	A_endothelial_reference = 3.3333;A_neuron_reference = 3.6337;A_oligodendrocyte_reference = 1.7118;A_microglia_reference = 1.128	NA	0.00027939	0.0869391	0.259316	0.00085827
Tfpt	TCF3 (E2A) fusion partner	7	3571926	3581531	-1	A1	ENSMUSG00000006335	FALSE	(ENSMUSG00000006335 ~ A_oligodendrocyte_reference) BIC = -68.27;(ENSMUSG00000006335 ~ A_endothelial_reference + A_oligodendrocyte_reference) BIC = -66.35	2	TRUE	A_oligodendrocyte_reference = 5.3668;A_endothelial_reference = 1.1173	NA	NA	8e-08	NA	0.263856
Susd2	sushi domain containing 2	10	75099364	75106753	-1	C1	ENSMUSG00000006342	FALSE	(ENSMUSG00000006342 ~ 1) BIC = 14.7;(ENSMUSG00000006342 ~ A_microglia_reference + A_neuron_reference) BIC = 15.46;(ENSMUSG00000006342 ~ A_microglia_reference) BIC = 15.64;(ENSMUSG00000006342 ~ A_microglia_reference + A_oligodendrocyte_reference) BIC = 16.46	4	TRUE	A_microglia_reference = 1.776;A_neuron_reference = 1.7672;A_oligodendrocyte_reference = 1.4863	NA	0.0771887	0.137196	0.0757344	NA
Ggt5	gamma-glutamyltransferase 5	10	75052126	75079713	1	C1	ENSMUSG00000006344	FALSE	(ENSMUSG00000006344 ~ 1) BIC = -11.69;(ENSMUSG00000006344 ~ A_endothelial_reference) BIC = -9.89	2	TRUE	A_endothelial_reference = 1.1876	NA	NA	NA	NA	0.23501
Ggt1	gamma-glutamyltransferase 1	10	75024349	75048945	1	C1	ENSMUSG00000006345	FALSE	(ENSMUSG00000006345 ~ A_astrocyte_reference + A_oligodendrocyte_reference) BIC = -4.89;(ENSMUSG00000006345 ~ 1) BIC = -3.34	2	TRUE	A_astrocyte_reference = 2.2298;A_oligodendrocyte_reference = 2.734	0.0257588	NA	0.00625763	NA	NA
Crip2	cysteine rich protein 2	12	114378447	114383715	1	F1	ENSMUSG00000006356	FALSE	(ENSMUSG00000006356 ~ A_oligodendrocyte_reference) BIC = -39.45	1	FALSE	NA	NA	NA	2.96878e-07	NA	NA
Crip1	cysteine-rich protein 1 (intestinal)	12	114390223	114392088	1	F1	ENSMUSG00000006360	FALSE	(ENSMUSG00000006360 ~ A_endothelial_reference + A_neuron_reference) BIC = 15.44;(ENSMUSG00000006360 ~ A_endothelial_reference + A_microglia_reference) BIC = 15.84;(ENSMUSG00000006360 ~ A_endothelial_reference + A_microglia_reference + A_neuron_reference) BIC = 17.05	3	TRUE	A_endothelial_reference = 5.0375;A_neuron_reference = 1.8783;A_microglia_reference = 1.7149	NA	0.0603359	NA	0.0863688	4.7e-07
Cbfa2t3	core-binding factor, runt domain, alpha subunit 2, translocated to, 3 (human)	8	125152639	125223009	-1	E1	ENSMUSG00000006362	FALSE	(ENSMUSG00000006362 ~ A_neuron_reference) BIC = -19.48	1	FALSE	NA	NA	1.52024e-06	NA	NA	NA
Fbln1	fibulin 1	15	85036379	85116965	1	E2	ENSMUSG00000006369	FALSE	(ENSMUSG00000006369 ~ A_microglia_reference) BIC = 32.94	1	FALSE	NA	NA	NA	NA	1.38079e-06	NA
Pgrmc1	progesterone receptor membrane component 1	X	34138201	34146074	1	A3.3	ENSMUSG00000006373	FALSE	(ENSMUSG00000006373 ~ A_neuron_reference) BIC = -28.3;(ENSMUSG00000006373 ~ A_oligodendrocyte_reference) BIC = -27.98;(ENSMUSG00000006373 ~ A_neuron_reference + A_oligodendrocyte_reference) BIC = -27;(ENSMUSG00000006373 ~ A_endothelial_reference + A_oligodendrocyte_reference) BIC = -26.9;(ENSMUSG00000006373 ~ A_astrocyte_reference + A_oligodendrocyte_reference) BIC = -26.87	5	TRUE	A_neuron_reference = 2.2888;A_oligodendrocyte_reference = 2.2526;A_endothelial_reference = 1.4108;A_astrocyte_reference = 1.4003	0.161417	0.0220937	0.0242822	NA	0.158292
Gcat	glycine C-acetyltransferase (2-amino-3-ketobutyrate-coenzyme A ligase)	15	78861304	78873988	1	E1	ENSMUSG00000006378	FALSE	(ENSMUSG00000006378 ~ A_endothelial_reference + A_oligodendrocyte_reference) BIC = -36.31;(ENSMUSG00000006378 ~ A_oligodendrocyte_reference) BIC = -36.1	2	TRUE	A_endothelial_reference = 1.7738;A_oligodendrocyte_reference = 4.3094	NA	NA	1.637e-05	NA	0.0760954
Tek	endothelial-specific receptor tyrosine kinase	4	94405980	94541667	1	C5	ENSMUSG00000006386	FALSE	(ENSMUSG00000006386 ~ A_endothelial_reference) BIC = 24.63	1	FALSE	NA	NA	NA	NA	NA	0.000225152
Mpl	myeloproliferative leukemia virus oncogene	4	118115020	118130118	-1	D2.1	ENSMUSG00000006389	FALSE	(ENSMUSG00000006389 ~ 1) BIC = 106.77;(ENSMUSG00000006389 ~ A_oligodendrocyte_reference) BIC = 107.2;(ENSMUSG00000006389 ~ A_microglia_reference) BIC = 107.24;(ENSMUSG00000006389 ~ A_endothelial_reference) BIC = 107.26;(ENSMUSG00000006389 ~ A_astrocyte_reference) BIC = 108.59;(ENSMUSG00000006389 ~ A_endothelial_reference + A_oligodendrocyte_reference) BIC = 108.67;(ENSMUSG00000006389 ~ A_endothel…	7	TRUE	A_oligodendrocyte_reference = 1.509;A_microglia_reference = 1.4995;A_endothelial_reference = 1.4327;A_astrocyte_reference = 1.1786	0.238563	NA	0.131287	0.133734	0.151942
Elovl1	elongation of very long chain fatty acids (FEN1/Elo2, SUR4/Elo3, yeast)-like 1	4	118100698	118105558	1	D2.1	ENSMUSG00000006390	FALSE	(ENSMUSG00000006390 ~ A_neuron_reference) BIC = -33.82	1	FALSE	NA	NA	4.47884e-07	NA	NA	NA
Med8	mediator of RNA polymerase II transcription, subunit 8 homolog (yeast)	4	118081942	118088387	1	D2.1	ENSMUSG00000006392	FALSE	(ENSMUSG00000006392 ~ A_astrocyte_reference + A_endothelial_reference) BIC = -66.96;(ENSMUSG00000006392 ~ A_astrocyte_reference) BIC = -66.18;(ENSMUSG00000006392 ~ A_microglia_reference) BIC = -65.24;(ENSMUSG00000006392 ~ A_endothelial_reference + A_microglia_reference) BIC = -65.21	4	TRUE	A_astrocyte_reference = 2.6869;A_endothelial_reference = 1.8534;A_microglia_reference = 2.4128	0.00721124	NA	NA	0.0158293	0.0638202
Hyi	hydroxypyruvate isomerase homolog (E. coli)	4	118032595	118035349	1	D2.1	ENSMUSG00000006395	FALSE	(ENSMUSG00000006395 ~ A_microglia_reference + A_neuron_reference) BIC = -12.36;(ENSMUSG00000006395 ~ A_endothelial_reference + A_microglia_reference + A_neuron_reference) BIC = -11.06	2	TRUE	A_microglia_reference = 2.7234;A_neuron_reference = 6.7225;A_endothelial_reference = 1.3071	NA	0	NA	0.00646179	0.191191
Adamts4	a disintegrin-like and metallopeptidase (reprolysin type) with thrombospondin type 1 motif, 4	1	173180552	173190768	1	H3	ENSMUSG00000006403	FALSE	(ENSMUSG00000006403 ~ A_neuron_reference + A_oligodendrocyte_reference) BIC = -3.07;(ENSMUSG00000006403 ~ A_endothelial_reference + A_neuron_reference + A_oligodendrocyte_reference) BIC = -2.14	2	TRUE	A_neuron_reference = 2.781;A_oligodendrocyte_reference = 3.3555;A_endothelial_reference = 1.4246	NA	0.00541902	0.00079229	NA	0.154264
Pvrl4	poliovirus receptor-related 4	1	173300230	173318729	1	H3	ENSMUSG00000006411	FALSE	(ENSMUSG00000006411 ~ 1) BIC = -28.67;(ENSMUSG00000006411 ~ A_microglia_reference) BIC = -28.35;(ENSMUSG00000006411 ~ A_astrocyte_reference) BIC = -27.99	3	TRUE	A_microglia_reference = 1.6651;A_astrocyte_reference = 1.5619	0.118321	NA	NA	0.0958916	NA
Pfdn2	prefoldin 2	1	173275801	173289385	1	H3	ENSMUSG00000006412	FALSE	(ENSMUSG00000006412 ~ A_neuron_reference + A_oligodendrocyte_reference) BIC = -62.4;(ENSMUSG00000006412 ~ A_endothelial_reference) BIC = -60.53	2	TRUE	A_neuron_reference = 2.8648;A_oligodendrocyte_reference = 2.8058;A_endothelial_reference = 1.9476	NA	0.00417234	0.0050195	NA	0.05146
Rnf114	ring finger protein 114	2	167318145	167341673	1	H3	ENSMUSG00000006418	FALSE	(ENSMUSG00000006418 ~ A_endothelial_reference) BIC = -80.07;(ENSMUSG00000006418 ~ A_endothelial_reference + A_neuron_reference) BIC = -79.81;(ENSMUSG00000006418 ~ A_endothelial_reference + A_neuron_reference + A_oligodendrocyte_reference) BIC = -79.08;(ENSMUSG00000006418 ~ A_neuron_reference + A_oligodendrocyte_reference) BIC = -79.07	4	TRUE	A_endothelial_reference = 2.1417;A_neuron_reference = 1.6376;A_oligodendrocyte_reference = 1.7608	NA	0.101514	0.0782783	NA	0.0322155
C330007P06Rik	RIKEN cDNA C330007P06 gene	X	34363732	34414106	-1	A3.3	ENSMUSG00000006423	FALSE	(ENSMUSG00000006423 ~ A_microglia_reference + A_neuron_reference) BIC = -68.46;(ENSMUSG00000006423 ~ A_astrocyte_reference + A_microglia_reference) BIC = -68.35;(ENSMUSG00000006423 ~ 1) BIC = -68.02;(ENSMUSG00000006423 ~ A_endothelial_reference) BIC = -67.85;(ENSMUSG00000006423 ~ A_astrocyte_reference + A_endothelial_reference + A_microglia_reference) BIC = -67.58;(ENSMUSG00000006423 ~ A_microgli…	7	TRUE	A_microglia_reference = 2.0266;A_neuron_reference = 1.9454;A_astrocyte_reference = 2.0022;A_endothelial_reference = 1.4552	0.0452588	0.0517314	NA	0.0427	0.145616
Neurl1a	neuralized homolog 1A (Drosophila)	19	47253310	47333930	1	C3	ENSMUSG00000006435	FALSE	(ENSMUSG00000006435 ~ A_microglia_reference + A_neuron_reference + A_oligodendrocyte_reference) BIC = -41.02;(ENSMUSG00000006435 ~ A_astrocyte_reference + A_microglia_reference + A_neuron_reference + A_oligodendrocyte_reference) BIC = -40.35;(ENSMUSG00000006435 ~ A_neuron_reference + A_oligodendrocyte_reference) BIC = -39.47	3	TRUE	A_microglia_reference = 2.101;A_neuron_reference = 3.536;A_oligodendrocyte_reference = 4.1424;A_astrocyte_reference = 1.4691	0.141815	0.00040629	3.437e-05	0.0356412	NA
Srm	spermidine synthase	4	147965612	147969102	1	E2	ENSMUSG00000006442	FALSE	(ENSMUSG00000006442 ~ A_endothelial_reference + A_neuron_reference + A_oligodendrocyte_reference) BIC = -44.17;(ENSMUSG00000006442 ~ A_neuron_reference + A_oligodendrocyte_reference) BIC = -43.93;(ENSMUSG00000006442 ~ A_endothelial_reference) BIC = -43.01	3	TRUE	A_endothelial_reference = 1.893;A_neuron_reference = 2.6905;A_oligodendrocyte_reference = 2.794	NA	0.00713487	0.00520637	NA	0.0583583
Epha2	Eph receptor A2	4	140857155	140885299	1	E1	ENSMUSG00000006445	FALSE	(ENSMUSG00000006445 ~ A_neuron_reference) BIC = 15.22;(ENSMUSG00000006445 ~ A_endothelial_reference + A_neuron_reference) BIC = 15.75;(ENSMUSG00000006445 ~ A_astrocyte_reference + A_endothelial_reference) BIC = 17.16	3	TRUE	A_neuron_reference = 2.3695;A_endothelial_reference = 1.6549;A_astrocyte_reference = 2.0793	0.0375916	0.0178135	NA	NA	0.0979514
Rbm14	RNA binding motif protein 14	19	4784299	4811634	-1	A	ENSMUSG00000006456	FALSE	(ENSMUSG00000006456 ~ 1) BIC = -78.2	1	FALSE	NA	NA	NA	NA	NA	NA
Actn3	actinin alpha 3	19	4861223	4877909	-1	A	ENSMUSG00000006457	FALSE	(ENSMUSG00000006457 ~ A_neuron_reference) BIC = 13.61;(ENSMUSG00000006457 ~ A_oligodendrocyte_reference) BIC = 14.05	2	TRUE	A_neuron_reference = 2.7163;A_oligodendrocyte_reference = 2.6273	NA	0.0066014	0.00860595	NA	NA
Zdhhc24	zinc finger, DHHC domain containing 24	19	4878668	4885397	1	A	ENSMUSG00000006463	FALSE	(ENSMUSG00000006463 ~ A_microglia_reference + A_neuron_reference) BIC = -77.21;(ENSMUSG00000006463 ~ A_neuron_reference) BIC = -76.4;(ENSMUSG00000006463 ~ A_astrocyte_reference) BIC = -75.81;(ENSMUSG00000006463 ~ A_astrocyte_reference + A_neuron_reference) BIC = -75.47	4	TRUE	A_microglia_reference = 1.9286;A_neuron_reference = 2.3944;A_astrocyte_reference = 2.0334	0.0420148	0.0166471	NA	0.0537837	NA
Bbs1	Bardet-Biedl syndrome 1 (human)	19	4886898	4906627	-1	A	ENSMUSG00000006464	FALSE	(ENSMUSG00000006464 ~ A_microglia_reference + A_neuron_reference) BIC = -79.33;(ENSMUSG00000006464 ~ A_endothelial_reference + A_microglia_reference + A_neuron_reference) BIC = -77.64;(ENSMUSG00000006464 ~ A_astrocyte_reference + A_neuron_reference) BIC = -77.44	3	TRUE	A_microglia_reference = 2.325;A_neuron_reference = 4.1896;A_endothelial_reference = 1.1757;A_astrocyte_reference = 1.8298	0.0672822	2.794e-05	NA	0.020074	0.239719
Ndor1	NADPH dependent diflavin oxidoreductase 1	2	25100340	25111542	-1	A3	ENSMUSG00000006471	FALSE	(ENSMUSG00000006471 ~ A_endothelial_reference + A_microglia_reference + A_oligodendrocyte_reference) BIC = -58.81;(ENSMUSG00000006471 ~ A_astrocyte_reference + A_endothelial_reference + A_microglia_reference + A_oligodendrocyte_reference) BIC = -57.89	2	TRUE	A_endothelial_reference = 3.0825;A_microglia_reference = 4.2994;A_oligodendrocyte_reference = 2.6121;A_astrocyte_reference = 1.3965	0.162564	NA	0.00899988	1.712e-05	0.00205289
Nelf	nasal embryonic LHRH factor	2	24909875	24918401	1	A3	ENSMUSG00000006476	FALSE	(ENSMUSG00000006476 ~ A_astrocyte_reference + A_microglia_reference + A_neuron_reference + A_oligodendrocyte_reference) BIC = -26.76;(ENSMUSG00000006476 ~ A_microglia_reference + A_neuron_reference + A_oligodendrocyte_reference) BIC = -26.5;(ENSMUSG00000006476 ~ A_neuron_reference + A_oligodendrocyte_reference) BIC = -25.16	3	TRUE	A_astrocyte_reference = 1.7134;A_microglia_reference = 2.1422;A_neuron_reference = 3.5141;A_oligodendrocyte_reference = 2.7903	0.0866357	0.00044132	0.00526549	0.0321789	NA
Pdk1	pyruvate dehydrogenase kinase, isoenzyme 1	2	71711281	71741915	1	C3	ENSMUSG00000006494	FALSE	(ENSMUSG00000006494 ~ A_astrocyte_reference + A_endothelial_reference + A_microglia_reference + A_neuron_reference + A_oligodendrocyte_reference) BIC = -26.36;(ENSMUSG00000006494 ~ A_endothelial_reference + A_neuron_reference + A_oligodendrocyte_reference) BIC = -24.96;(ENSMUSG00000006494 ~ A_endothelial_reference + A_neuron_reference) BIC = -24.86	3	TRUE	A_astrocyte_reference = 2.2966;A_endothelial_reference = 2.5531;A_microglia_reference = 2.2565;A_neuron_reference = 3.3061;A_oligodendrocyte_reference = 2.0437	0.0216443	0.00094599	0.0409788	0.024039	0.0106758
Ptbp1	polypyrimidine tract binding protein 1	10	79317172	79327516	1	C1	ENSMUSG00000006498	FALSE	(ENSMUSG00000006498 ~ A_endothelial_reference) BIC = -44.43;(ENSMUSG00000006498 ~ A_endothelial_reference + A_oligodendrocyte_reference) BIC = -42.83	2	TRUE	A_endothelial_reference = 3.7617;A_oligodendrocyte_reference = 1.2361	NA	NA	0.216428	NA	0.00016873
Mvd	mevalonate (diphospho) decarboxylase	8	124957496	124967322	-1	E1	ENSMUSG00000006517	FALSE	(ENSMUSG00000006517 ~ 1) BIC = -39.61;(ENSMUSG00000006517 ~ A_astrocyte_reference) BIC = -38.98;(ENSMUSG00000006517 ~ A_microglia_reference) BIC = -38.91;(ENSMUSG00000006517 ~ A_oligodendrocyte_reference) BIC = -38.43	4	TRUE	A_astrocyte_reference = 1.5766;A_microglia_reference = 1.5562;A_oligodendrocyte_reference = 1.4041	0.114884	NA	0.160283	0.119651	NA
Cyba	cytochrome b-245, alpha polypeptide	8	124948672	124956840	-1	E1	ENSMUSG00000006519	FALSE	(ENSMUSG00000006519 ~ A_astrocyte_reference + A_endothelial_reference + A_microglia_reference) BIC = -18.48;(ENSMUSG00000006519 ~ A_astrocyte_reference + A_endothelial_reference + A_microglia_reference + A_oligodendrocyte_reference) BIC = -17.74;(ENSMUSG00000006519 ~ A_endothelial_reference + A_microglia_reference) BIC = -17.19;(ENSMUSG00000006519 ~ A_astrocyte_reference + A_endothelial_reference…	4	TRUE	A_astrocyte_reference = 2.2282;A_endothelial_reference = 3.283;A_microglia_reference = 2.254;A_oligodendrocyte_reference = 1.4493	0.0258687	NA	0.147258	0.0241958	0.001027
Itih3	inter-alpha trypsin inhibitor, heavy chain 3	14	31721759	31736946	-1	B	ENSMUSG00000006522	FALSE	(ENSMUSG00000006522 ~ A_neuron_reference) BIC = 18.74;(ENSMUSG00000006522 ~ A_microglia_reference + A_neuron_reference) BIC = 20.04	2	TRUE	A_neuron_reference = 4.7419;A_microglia_reference = 1.3379	NA	2.12e-06	NA	0.180919	NA
Tmem110	transmembrane protein 110	14	31638776	31690172	1	B	ENSMUSG00000006526	FALSE	(ENSMUSG00000006526 ~ A_microglia_reference) BIC = -83.37	1	FALSE	NA	NA	NA	NA	0.000390662	NA
Sfmbt1	Scm-like with four mbt domains 1	14	31528035	31635899	1	B	ENSMUSG00000006527	FALSE	(ENSMUSG00000006527 ~ A_endothelial_reference + A_neuron_reference) BIC = -60.83	1	FALSE	NA	NA	0.000441078	NA	NA	1.41429e-05
Atp7b	ATPase, Cu++ transporting, beta polypeptide	8	23103257	23170777	-1	A2	ENSMUSG00000006567	FALSE	(ENSMUSG00000006567 ~ A_microglia_reference + A_oligodendrocyte_reference) BIC = -12.82;(ENSMUSG00000006567 ~ A_microglia_reference) BIC = -12.57;(ENSMUSG00000006567 ~ 1) BIC = -12.16;(ENSMUSG00000006567 ~ A_microglia_reference + A_neuron_reference) BIC = -11.18;(ENSMUSG00000006567 ~ A_astrocyte_reference + A_microglia_reference) BIC = -11.16	5	TRUE	A_microglia_reference = 2.0608;A_oligodendrocyte_reference = 1.7842;A_neuron_reference = 1.3046;A_astrocyte_reference = 1.2999	0.193643	0.19202	0.0743881	0.039319	NA
Rundc3a	RUN domain containing 3A	11	102254717	102263869	1	D	ENSMUSG00000006575	FALSE	(ENSMUSG00000006575 ~ A_endothelial_reference + A_oligodendrocyte_reference) BIC = -60.5;(ENSMUSG00000006575 ~ A_oligodendrocyte_reference) BIC = -60.27	2	TRUE	A_endothelial_reference = 1.782;A_oligodendrocyte_reference = 5.9051	NA	NA	0	NA	0.0747535
Slc4a3	solute carrier family 4 (anion exchanger), member 3	1	75542841	75558747	1	C4	ENSMUSG00000006576	FALSE	(ENSMUSG00000006576 ~ A_endothelial_reference + A_microglia_reference + A_neuron_reference) BIC = -56.44;(ENSMUSG00000006576 ~ A_endothelial_reference + A_microglia_reference + A_neuron_reference + A_oligodendrocyte_reference) BIC = -55.01;(ENSMUSG00000006576 ~ A_microglia_reference + A_neuron_reference) BIC = -54.85	3	TRUE	A_endothelial_reference = 2.1319;A_microglia_reference = 3.2557;A_neuron_reference = 3.0379;A_oligodendrocyte_reference = 1.2403	NA	0.00238271	0.214878	0.00113094	0.0330121
Cdt1	chromatin licensing and DNA replication factor 1	8	125091915	125097028	1	E1	ENSMUSG00000006585	FALSE	(ENSMUSG00000006585 ~ 1) BIC = 15.21;(ENSMUSG00000006585 ~ A_microglia_reference) BIC = 16.22	2	TRUE	A_microglia_reference = 1.4591	NA	NA	NA	0.144524	NA
Runx1t1	runt-related transcription factor 1; translocated to, 1 (cyclin D-related)	4	13670583	13820796	1	A1	ENSMUSG00000006586	FALSE	(ENSMUSG00000006586 ~ A_astrocyte_reference + A_microglia_reference + A_neuron_reference + A_oligodendrocyte_reference) BIC = -35.28;(ENSMUSG00000006586 ~ A_microglia_reference + A_neuron_reference + A_oligodendrocyte_reference) BIC = -34.12	2	TRUE	A_astrocyte_reference = 1.9296;A_microglia_reference = 2.1822;A_neuron_reference = 3.6224;A_oligodendrocyte_reference = 3.3753	0.0536569	0.00029184	0.00073746	0.0290982	NA
Aprt	adenine phosphoribosyl transferase	8	125098537	125100807	-1	E1	ENSMUSG00000006589	FALSE	(ENSMUSG00000006589 ~ A_oligodendrocyte_reference) BIC = -43.07	1	FALSE	NA	NA	NA	9.22118e-11	NA	NA
Gtf2h1	general transcription factor II H, polypeptide 1	7	54051473	54079170	1	B4	ENSMUSG00000006599	FALSE	(ENSMUSG00000006599 ~ A_oligodendrocyte_reference) BIC = -71.81;(ENSMUSG00000006599 ~ A_endothelial_reference + A_oligodendrocyte_reference) BIC = -71.54	2	TRUE	A_oligodendrocyte_reference = 3.9455;A_endothelial_reference = 1.6453	NA	NA	7.964e-05	NA	0.0999073
Hfe	hemochromatosis	13	23793903	23802723	-1	A3.1	ENSMUSG00000006611	FALSE	(ENSMUSG00000006611 ~ A_microglia_reference + A_oligodendrocyte_reference) BIC = -19.08;(ENSMUSG00000006611 ~ A_endothelial_reference + A_microglia_reference + A_neuron_reference + A_oligodendrocyte_reference) BIC = -18.42;(ENSMUSG00000006611 ~ A_endothelial_reference + A_microglia_reference + A_oligodendrocyte_reference) BIC = -18.27;(ENSMUSG00000006611 ~ A_astrocyte_reference + A_endothelial_re…	5	TRUE	A_microglia_reference = 2.2405;A_oligodendrocyte_reference = 2.5148;A_endothelial_reference = 1.7692;A_neuron_reference = 1.7573;A_astrocyte_reference = 1.3479	0.177683	0.0788702	0.0119093	0.0250593	0.0768535
Abhd1	abhydrolase domain containing 1	5	31252439	31257464	1	B1	ENSMUSG00000006638	FALSE	(ENSMUSG00000006638 ~ A_oligodendrocyte_reference) BIC = -20.19	1	FALSE	NA	NA	NA	0.000465777	NA	NA
Slc5a6	solute carrier family 5 (sodium-dependent vitamin transporter), member 6	5	31338409	31351297	-1	B1	ENSMUSG00000006641	FALSE	(ENSMUSG00000006641 ~ A_neuron_reference) BIC = -39.24;(ENSMUSG00000006641 ~ A_astrocyte_reference) BIC = -37.75;(ENSMUSG00000006641 ~ A_oligodendrocyte_reference) BIC = -37.5	3	TRUE	A_neuron_reference = 2.2865;A_astrocyte_reference = 1.9337;A_oligodendrocyte_reference = 1.8676	0.0531522	0.0222265	0.0618181	NA	NA
Nphs1	nephrosis 1 homolog, nephrin (human)	7	31243334	31272242	1	B1	ENSMUSG00000006649	FALSE	(ENSMUSG00000006649 ~ 1) BIC = 12.92;(ENSMUSG00000006649 ~ A_neuron_reference) BIC = 13.67;(ENSMUSG00000006649 ~ A_oligodendrocyte_reference) BIC = 14.31	3	TRUE	A_neuron_reference = 1.5402;A_oligodendrocyte_reference = 1.336	NA	0.123519	0.181539	NA	NA
Aplp1	amyloid beta (A4) precursor-like protein 1	7	31220001	31230580	-1	B1	ENSMUSG00000006651	FALSE	(ENSMUSG00000006651 ~ A_oligodendrocyte_reference) BIC = -93.13;(ENSMUSG00000006651 ~ A_endothelial_reference + A_oligodendrocyte_reference) BIC = -91.84;(ENSMUSG00000006651 ~ A_microglia_reference + A_oligodendrocyte_reference) BIC = -91.24	3	TRUE	A_oligodendrocyte_reference = 5.0997;A_endothelial_reference = 1.3389;A_microglia_reference = 1.1275	NA	NA	3.4e-07	0.259548	0.180594
Qrich1	glutamine-rich 1	9	108419418	108462498	1	F2	ENSMUSG00000006673	FALSE	(ENSMUSG00000006673 ~ A_endothelial_reference) BIC = -90.71;(ENSMUSG00000006673 ~ A_endothelial_reference + A_microglia_reference) BIC = -88.88	2	TRUE	A_endothelial_reference = 2.9163;A_microglia_reference = 1.1528	NA	NA	NA	0.248986	0.00354261
P4htm	prolyl 4-hydroxylase, transmembrane (endoplasmic reticulum)	9	108481157	108499931	-1	F2	ENSMUSG00000006675	FALSE	(ENSMUSG00000006675 ~ A_microglia_reference + A_oligodendrocyte_reference) BIC = -51.28;(ENSMUSG00000006675 ~ A_oligodendrocyte_reference) BIC = -50.98	2	TRUE	A_microglia_reference = 1.7972;A_oligodendrocyte_reference = 3.014	NA	NA	0.00257852	0.0722965	NA
Usp19	ubiquitin specific peptidase 19	9	108393020	108404670	1	F2	ENSMUSG00000006676	FALSE	(ENSMUSG00000006676 ~ A_microglia_reference) BIC = -50.25;(ENSMUSG00000006676 ~ A_microglia_reference + A_oligodendrocyte_reference) BIC = -49.85;(ENSMUSG00000006676 ~ A_endothelial_reference + A_microglia_reference + A_oligodendrocyte_reference) BIC = -48.6	3	TRUE	A_microglia_reference = 2.4818;A_oligodendrocyte_reference = 1.6702;A_endothelial_reference = 1.3264	NA	NA	0.0948833	0.0130736	0.184703
Pola1	polymerase (DNA directed), alpha 1	X	90550106	90877494	-1	C3	ENSMUSG00000006678	FALSE	(ENSMUSG00000006678 ~ A_astrocyte_reference + A_endothelial_reference + A_neuron_reference) BIC = -33.63;(ENSMUSG00000006678 ~ A_endothelial_reference + A_neuron_reference) BIC = -32.4;(ENSMUSG00000006678 ~ A_endothelial_reference + A_microglia_reference + A_neuron_reference) BIC = -32.08	3	TRUE	A_astrocyte_reference = 1.9863;A_endothelial_reference = 3.5085;A_neuron_reference = 2.6622;A_microglia_reference = 1.599	0.0469949	0.00776424	NA	0.109815	0.00045068
Cdc42	cell division cycle 42 homolog (S. cerevisiae)	4	136875611	136913635	-1	D3	ENSMUSG00000006699	FALSE	(ENSMUSG00000006699 ~ A_microglia_reference + A_oligodendrocyte_reference) BIC = -77.24;(ENSMUSG00000006699 ~ A_astrocyte_reference + A_microglia_reference + A_oligodendrocyte_reference) BIC = -76.99;(ENSMUSG00000006699 ~ A_astrocyte_reference + A_microglia_reference + A_neuron_reference + A_oligodendrocyte_reference) BIC = -76.84;(ENSMUSG00000006699 ~ A_oligodendrocyte_reference) BIC = -76.61	4	TRUE	A_microglia_reference = 2.1185;A_oligodendrocyte_reference = 2.2723;A_astrocyte_reference = 1.7755;A_neuron_reference = 1.609	0.0758196	0.107609	0.0230705	0.034134	NA
Pknox1	Pbx/knotted 1 homeobox	17	31701694	31744625	1	B1	ENSMUSG00000006705	FALSE	(ENSMUSG00000006705 ~ A_astrocyte_reference + A_microglia_reference + A_oligodendrocyte_reference) BIC = -47.45;(ENSMUSG00000006705 ~ A_astrocyte_reference + A_oligodendrocyte_reference) BIC = -46.76	2	TRUE	A_astrocyte_reference = 2.2775;A_microglia_reference = 1.8587;A_oligodendrocyte_reference = 2.5602	0.0227538	NA	0.0104611	0.0630765	NA
D130043K22Rik	RIKEN cDNA D130043K22 gene	13	24937004	24993139	1	A3.1	ENSMUSG00000006711	FALSE	(ENSMUSG00000006711 ~ A_endothelial_reference + A_microglia_reference + A_neuron_reference) BIC = -43.07	1	FALSE	NA	NA	0.00134516	NA	1.69647e-05	0.000493703
Gmnn	geminin	13	24843714	24853792	-1	A3.1	ENSMUSG00000006715	FALSE	(ENSMUSG00000006715 ~ A_neuron_reference) BIC = 15.74	1	FALSE	NA	NA	1.40241e-06	NA	NA	NA
Acot13	acyl-CoA thioesterase 13	13	24909817	24923386	-1	A3.1	ENSMUSG00000006717	FALSE	(ENSMUSG00000006717 ~ A_neuron_reference + A_oligodendrocyte_reference) BIC = -51.79;(ENSMUSG00000006717 ~ A_endothelial_reference) BIC = -50.09	2	TRUE	A_neuron_reference = 2.2833;A_oligodendrocyte_reference = 3.0169;A_endothelial_reference = 1.9977	NA	0.0224107	0.00255361	NA	0.045754
Zfp184	zinc finger protein 184 (Kruppel-like)	13	22036963	22052648	1	A3.1	ENSMUSG00000006720	FALSE	(ENSMUSG00000006720 ~ A_oligodendrocyte_reference) BIC = -21.13;(ENSMUSG00000006720 ~ A_astrocyte_reference + A_oligodendrocyte_reference) BIC = -20.65	2	TRUE	A_oligodendrocyte_reference = 3.4141;A_astrocyte_reference = 1.5866	0.112606	NA	0.00063987	NA	NA
Cdk4	cyclin-dependent kinase 4	10	126500590	126504976	1	D3	ENSMUSG00000006728	FALSE	(ENSMUSG00000006728 ~ A_endothelial_reference + A_neuron_reference + A_oligodendrocyte_reference) BIC = -82.89	1	FALSE	NA	NA	0.0150445	0.00323047	NA	1.8129e-07
B4galnt1	beta-1,4-N-acetyl-galactosaminyl transferase 1	10	126602247	126609385	1	D3	ENSMUSG00000006731	FALSE	(ENSMUSG00000006731 ~ A_oligodendrocyte_reference) BIC = -56.52;(ENSMUSG00000006731 ~ A_endothelial_reference + A_oligodendrocyte_reference) BIC = -56.3	2	TRUE	A_oligodendrocyte_reference = 2.4823;A_endothelial_reference = 1.6617	NA	NA	0.0130542	NA	0.0965697
Mettl1	methyltransferase like 1	10	126478470	126483421	1	D3	ENSMUSG00000006732	FALSE	(ENSMUSG00000006732 ~ A_neuron_reference) BIC = -45.42	1	FALSE	NA	NA	0.00126044	NA	NA	NA
Tspan31	tetraspanin 31	10	126504373	126507317	-1	D3	ENSMUSG00000006736	FALSE	(ENSMUSG00000006736 ~ A_endothelial_reference + A_microglia_reference + A_oligodendrocyte_reference) BIC = -69.88;(ENSMUSG00000006736 ~ A_astrocyte_reference + A_endothelial_reference + A_microglia_reference + A_oligodendrocyte_reference) BIC = -68.01	2	TRUE	A_endothelial_reference = 2.4363;A_microglia_reference = 3.7477;A_oligodendrocyte_reference = 2.7709;A_astrocyte_reference = 1.0872	0.276967	NA	0.00558951	0.00017846	0.0148392
Kif5b	kinesin family member 5B	18	6201000	6242172	-1	A1	ENSMUSG00000006740	FALSE	(ENSMUSG00000006740 ~ A_oligodendrocyte_reference) BIC = -44.97;(ENSMUSG00000006740 ~ A_microglia_reference + A_oligodendrocyte_reference) BIC = -44.8;(ENSMUSG00000006740 ~ A_astrocyte_reference + A_oligodendrocyte_reference) BIC = -44	3	TRUE	A_oligodendrocyte_reference = 3.477;A_microglia_reference = 1.6757;A_astrocyte_reference = 1.4426	0.149136	NA	0.00050704	0.0938044	NA
Saal1	serum amyloid A-like 1	7	53941478	53966050	-1	B4	ENSMUSG00000006763	FALSE	(ENSMUSG00000006763 ~ A_endothelial_reference + A_neuron_reference) BIC = -55.02;(ENSMUSG00000006763 ~ A_endothelial_reference + A_microglia_reference + A_neuron_reference) BIC = -54.38	2	TRUE	A_endothelial_reference = 3.0906;A_neuron_reference = 3.1491;A_microglia_reference = 1.5093	NA	0.00163774	NA	0.131234	0.00199782
Tph2	tryptophan hydroxylase 2	10	114515697	114622078	-1	D2	ENSMUSG00000006764	FALSE	(ENSMUSG00000006764 ~ 1) BIC = 45.68;(ENSMUSG00000006764 ~ A_astrocyte_reference) BIC = 46.85;(ENSMUSG00000006764 ~ A_neuron_reference) BIC = 46.96;(ENSMUSG00000006764 ~ A_microglia_reference) BIC = 47.14;(ENSMUSG00000006764 ~ A_oligodendrocyte_reference) BIC = 47.53	5	TRUE	A_astrocyte_reference = 1.4072;A_neuron_reference = 1.371;A_microglia_reference = 1.309;A_oligodendrocyte_reference = 1.1638	0.159361	0.170365	0.244494	0.190551	NA
Cnp	2',3'-cyclic nucleotide 3' phosphodiesterase	11	100436218	100453043	1	D	ENSMUSG00000006782	FALSE	(ENSMUSG00000006782 ~ A_endothelial_reference + A_neuron_reference + A_oligodendrocyte_reference) BIC = -12.13	1	FALSE	NA	NA	1.07377e-12	0.0181925	NA	0.0485755
Ttc25	tetratricopeptide repeat domain 25	11	100406921	100433882	1	D	ENSMUSG00000006784	FALSE	(ENSMUSG00000006784 ~ A_astrocyte_reference) BIC = 22.11	1	FALSE	NA	0.0218823	NA	NA	NA	NA
Sulf2	sulfatase 2	2	165898589	165981163	-1	H3	ENSMUSG00000006800	FALSE	(ENSMUSG00000006800 ~ A_neuron_reference + A_oligodendrocyte_reference) BIC = -44.4	1	FALSE	NA	NA	1.71715e-09	0.00871549	NA	NA
Sod2	superoxide dismutase 2, mitochondrial	17	13200705	13210985	1	A1	ENSMUSG00000006818	FALSE	(ENSMUSG00000006818 ~ A_astrocyte_reference + A_neuron_reference + A_oligodendrocyte_reference) BIC = -82.09;(ENSMUSG00000006818 ~ A_astrocyte_reference + A_oligodendrocyte_reference) BIC = -80.57	2	TRUE	A_astrocyte_reference = 2.5317;A_neuron_reference = 2.0529;A_oligodendrocyte_reference = 3.7625	0.0113514	0.0400807	0.00016825	NA	NA
Tmco6	transmembrane and coiled-coil domains 6	18	36894722	36902045	1	B2	ENSMUSG00000006850	FALSE	(ENSMUSG00000006850 ~ A_endothelial_reference) BIC = -35.25	1	FALSE	NA	NA	NA	NA	NA	0.0249914
Stambp	STAM binding protein	6	83493200	83522498	-1	C3	ENSMUSG00000006906	FALSE	(ENSMUSG00000006906 ~ A_neuron_reference) BIC = -77.06;(ENSMUSG00000006906 ~ A_microglia_reference + A_neuron_reference) BIC = -76.31;(ENSMUSG00000006906 ~ 1) BIC = -76.16;(ENSMUSG00000006906 ~ A_endothelial_reference + A_neuron_reference) BIC = -75.84;(ENSMUSG00000006906 ~ A_endothelial_reference + A_oligodendrocyte_reference) BIC = -75.15	5	TRUE	A_neuron_reference = 2.0111;A_microglia_reference = 1.5108;A_endothelial_reference = 1.5;A_oligodendrocyte_reference = 1.8178	NA	0.0443124	0.0690947	0.130846	0.133622
Ezh1	enhancer of zeste homolog 1 (Drosophila)	11	101052429	101087777	-1	D	ENSMUSG00000006920	FALSE	(ENSMUSG00000006920 ~ A_neuron_reference) BIC = -73.83	1	FALSE	NA	NA	0.00846983	NA	NA	NA
Hap1	huntingtin-associated protein 1	11	100208641	100217455	-1	D	ENSMUSG00000006930	FALSE	(ENSMUSG00000006930 ~ A_microglia_reference + A_neuron_reference) BIC = 19.79;(ENSMUSG00000006930 ~ A_microglia_reference) BIC = 19.87;(ENSMUSG00000006930 ~ A_neuron_reference) BIC = 20.09;(ENSMUSG00000006930 ~ A_astrocyte_reference) BIC = 20.23;(ENSMUSG00000006930 ~ A_microglia_reference + A_oligodendrocyte_reference) BIC = 21.13;(ENSMUSG00000006930 ~ A_oligodendrocyte_reference) BIC = 21.51;(EN…	8	TRUE	A_microglia_reference = 1.9707;A_neuron_reference = 2.0489;A_astrocyte_reference = 1.9396;A_oligodendrocyte_reference = 1.6893;A_endothelial_reference = 1.1433	0.0524329	0.0404706	0.0911601	0.0487637	0.252904
Leprel4	leprecan-like 4	11	100269770	100276150	-1	D	ENSMUSG00000006931	FALSE	(ENSMUSG00000006931 ~ 1) BIC = -17.91;(ENSMUSG00000006931 ~ A_neuron_reference) BIC = -17.53	2	TRUE	A_neuron_reference = 1.6487	NA	0.0992152	NA	NA	NA
Ctnnb1	catenin (cadherin associated protein), beta 1	9	120838334	120869625	1	F4	ENSMUSG00000006932	FALSE	(ENSMUSG00000006932 ~ A_microglia_reference + A_neuron_reference) BIC = -82.09;(ENSMUSG00000006932 ~ A_microglia_reference + A_neuron_reference + A_oligodendrocyte_reference) BIC = -81	2	TRUE	A_microglia_reference = 2.7887;A_neuron_reference = 4.7382;A_oligodendrocyte_reference = 1.3761	NA	2.16e-06	0.168787	0.005292	NA
Eif1b	eukaryotic translation initiation factor 1B	9	120401724	120404445	1	F4	ENSMUSG00000006941	FALSE	(ENSMUSG00000006941 ~ A_neuron_reference + A_oligodendrocyte_reference) BIC = -50.79;(ENSMUSG00000006941 ~ A_oligodendrocyte_reference) BIC = -50.07	2	TRUE	A_neuron_reference = 1.9042;A_oligodendrocyte_reference = 2.2424	NA	0.0568803	0.0249342	NA	NA
Chrd	chordin	16	20733200	20742457	1	B1	ENSMUSG00000006958	FALSE	(ENSMUSG00000006958 ~ A_astrocyte_reference + A_neuron_reference) BIC = -6.44;(ENSMUSG00000006958 ~ A_astrocyte_reference + A_neuron_reference + A_oligodendrocyte_reference) BIC = -4.52	2	TRUE	A_astrocyte_reference = 3.2149;A_neuron_reference = 4.2547;A_oligodendrocyte_reference = 1.0971	0.00130504	2.093e-05	0.272599	NA	NA
Psmd2	proteasome (prosome, macropain) 26S subunit, non-ATPase, 2	16	20651725	20663487	1	B1	ENSMUSG00000006998	FALSE	(ENSMUSG00000006998 ~ 1) BIC = -97.68	1	FALSE	NA	NA	NA	NA	NA	NA
Syngr3	synaptogyrin 3	17	24822037	24826900	-1	A3.3	ENSMUSG00000007021	FALSE	(ENSMUSG00000007021 ~ 1) BIC = -58.93;(ENSMUSG00000007021 ~ A_neuron_reference + A_oligodendrocyte_reference) BIC = -58.31;(ENSMUSG00000007021 ~ A_oligodendrocyte_reference) BIC = -58.3	3	TRUE	A_neuron_reference = 1.723;A_oligodendrocyte_reference = 1.5825	NA	0.0848924	0.113536	NA	NA
Vars	valyl-tRNA synthetase	17	35137932	35153267	1	B1	ENSMUSG00000007029	FALSE	(ENSMUSG00000007029 ~ A_endothelial_reference + A_microglia_reference + A_oligodendrocyte_reference) BIC = -44.75;(ENSMUSG00000007029 ~ A_endothelial_reference + A_microglia_reference) BIC = -43.29;(ENSMUSG00000007029 ~ A_microglia_reference) BIC = -43.12;(ENSMUSG00000007029 ~ A_microglia_reference + A_neuron_reference) BIC = -43.1;(ENSMUSG00000007029 ~ A_microglia_reference + A_oligodendrocyte_r…	5	TRUE	A_endothelial_reference = 1.9915;A_microglia_reference = 3.439;A_oligodendrocyte_reference = 1.9102;A_neuron_reference = 1.7141	NA	0.0865018	0.0561095	0.00058378	0.0464291
Abhd16a	abhydrolase domain containing 16A	17	35226208	35239932	1	B1	ENSMUSG00000007036	FALSE	(ENSMUSG00000007036 ~ A_endothelial_reference + A_oligodendrocyte_reference) BIC = -49.54;(ENSMUSG00000007036 ~ A_endothelial_reference + A_microglia_reference) BIC = -49.07;(ENSMUSG00000007036 ~ A_endothelial_reference + A_microglia_reference + A_oligodendrocyte_reference) BIC = -47.85;(ENSMUSG00000007036 ~ A_astrocyte_reference + A_endothelial_reference) BIC = -47.61	4	TRUE	A_endothelial_reference = 2.8054;A_oligodendrocyte_reference = 1.8696;A_microglia_reference = 1.6777;A_astrocyte_reference = 1.8299	0.0672608	NA	0.0615454	0.0933981	0.00502619
Neu1	neuraminidase 1	17	35068198	35072898	1	B1	ENSMUSG00000007038	FALSE	(ENSMUSG00000007038 ~ A_endothelial_reference + A_oligodendrocyte_reference) BIC = -72.52;(ENSMUSG00000007038 ~ A_endothelial_reference + A_neuron_reference + A_oligodendrocyte_reference) BIC = -71.52;(ENSMUSG00000007038 ~ A_neuron_reference + A_oligodendrocyte_reference) BIC = -70.73	3	TRUE	A_endothelial_reference = 2.1664;A_oligodendrocyte_reference = 1.9142;A_neuron_reference = 1.5856	NA	0.11284	0.0555956	NA	0.0302815
Ddah2	dimethylarginine dimethylaminohydrolase 2	17	35195980	35199040	1	B1	ENSMUSG00000007039	FALSE	(ENSMUSG00000007039 ~ 1) BIC = -32.85;(ENSMUSG00000007039 ~ A_oligodendrocyte_reference) BIC = -31.61	2	TRUE	A_oligodendrocyte_reference = 1.3832	NA	NA	0.166598	NA	NA
Clic1	chloride intracellular channel 1	17	35186911	35195694	1	B1	ENSMUSG00000007041	FALSE	(ENSMUSG00000007041 ~ A_endothelial_reference + A_microglia_reference) BIC = -24.09	1	FALSE	NA	NA	NA	NA	6.84321e-06	0.046003
Lsm2	LSM2 homolog, U6 small nuclear RNA associated (S. cerevisiae)	17	35118807	35122836	1	B1	ENSMUSG00000007050	FALSE	(ENSMUSG00000007050 ~ A_oligodendrocyte_reference) BIC = -58.66;(ENSMUSG00000007050 ~ A_astrocyte_reference + A_oligodendrocyte_reference) BIC = -57.83	2	TRUE	A_oligodendrocyte_reference = 3.0583;A_astrocyte_reference = 1.4855	0.13742	NA	0.00222625	NA	NA
Pole	polymerase (DNA directed), epsilon	5	110715325	110766493	1	F	ENSMUSG00000007080	FALSE	(ENSMUSG00000007080 ~ A_neuron_reference) BIC = 2.46;(ENSMUSG00000007080 ~ A_neuron_reference + A_oligodendrocyte_reference) BIC = 3.82;(ENSMUSG00000007080 ~ A_endothelial_reference + A_neuron_reference) BIC = 4.22;(ENSMUSG00000007080 ~ A_microglia_reference + A_neuron_reference) BIC = 4.37;(ENSMUSG00000007080 ~ 1) BIC = 4.4	5	TRUE	A_neuron_reference = 2.0155;A_oligodendrocyte_reference = 1.317;A_endothelial_reference = 1.1766;A_microglia_reference = 1.1186	NA	0.0438561	0.187822	0.263294	0.239361
Atp1a2	ATPase, Na+/K+ transporting, alpha 2 polypeptide	1	174201840	174228195	-1	H3	ENSMUSG00000007097	FALSE	(ENSMUSG00000007097 ~ A_microglia_reference + A_oligodendrocyte_reference) BIC = -37.02	1	FALSE	NA	NA	NA	0.000516333	3.34706e-06	NA
Stx1a	syntaxin 1A (brain)	5	135499352	135526970	1	G2	ENSMUSG00000007207	FALSE	(ENSMUSG00000007207 ~ A_neuron_reference) BIC = 17.25;(ENSMUSG00000007207 ~ A_neuron_reference + A_oligodendrocyte_reference) BIC = 17.4;(ENSMUSG00000007207 ~ A_astrocyte_reference + A_neuron_reference) BIC = 17.78;(ENSMUSG00000007207 ~ A_astrocyte_reference + A_oligodendrocyte_reference) BIC = 18.3;(ENSMUSG00000007207 ~ A_astrocyte_reference + A_neuron_reference + A_oligodendrocyte_reference) BI…	7	TRUE	A_neuron_reference = 2.5637;A_oligodendrocyte_reference = 2.027;A_astrocyte_reference = 1.8402;A_endothelial_reference = 1.6047;A_microglia_reference = 1.5044	0.0657417	0.0103561	0.0426623	0.132478	0.108552
Zfp775	zinc finger protein 775	6	48563179	48573226	1	B2.3	ENSMUSG00000007216	FALSE	(ENSMUSG00000007216 ~ A_astrocyte_reference + A_microglia_reference) BIC = -26.45;(ENSMUSG00000007216 ~ 1) BIC = -25;(ENSMUSG00000007216 ~ A_astrocyte_reference + A_endothelial_reference + A_microglia_reference) BIC = -24.8;(ENSMUSG00000007216 ~ A_astrocyte_reference) BIC = -24.65	4	TRUE	A_astrocyte_reference = 2.1465;A_microglia_reference = 2.0839;A_endothelial_reference = 1.1918	0.03183	NA	NA	0.0371695	0.233358
Scube2	signal peptide, CUB domain, EGF-like 2	7	116942190	117009193	-1	F1	ENSMUSG00000007279	FALSE	(ENSMUSG00000007279 ~ A_oligodendrocyte_reference) BIC = 11.5;(ENSMUSG00000007279 ~ A_microglia_reference + A_oligodendrocyte_reference) BIC = 13.3	2	TRUE	A_oligodendrocyte_reference = 3.8095;A_microglia_reference = 1.1633	NA	NA	0.00013924	0.244695	NA
Mrpl49	mitochondrial ribosomal protein L49	19	6053630	6057758	-1	A	ENSMUSG00000007338	FALSE	(ENSMUSG00000007338 ~ A_oligodendrocyte_reference) BIC = -67.84	1	FALSE	NA	NA	NA	0.00272852	NA	NA
Mark3	MAP/microtubule affinity-regulating kinase 3	12	112812721	112894438	1	F1	ENSMUSG00000007411	FALSE	(ENSMUSG00000007411 ~ 1) BIC = -84.2	1	FALSE	NA	NA	NA	NA	NA	NA
Gatad1	GATA zinc finger domain containing 1	5	3632932	3647934	-1	A1	ENSMUSG00000007415	FALSE	(ENSMUSG00000007415 ~ A_neuron_reference) BIC = -70.26;(ENSMUSG00000007415 ~ A_microglia_reference + A_neuron_reference + A_oligodendrocyte_reference) BIC = -69.57;(ENSMUSG00000007415 ~ A_microglia_reference + A_neuron_reference) BIC = -69.43;(ENSMUSG00000007415 ~ A_astrocyte_reference + A_neuron_reference) BIC = -68.53;(ENSMUSG00000007415 ~ A_neuron_reference + A_oligodendrocyte_reference) BIC =…	5	TRUE	A_neuron_reference = 2.5588;A_microglia_reference = 1.6866;A_oligodendrocyte_reference = 1.4608;A_astrocyte_reference = 1.1882	0.234769	0.0105021	0.14406	0.0916722	NA
Pcdha9 / Pcdhac2 / Pcdhac1 / Pcdha5 / Pcdha4 / Pcdha2 / Pcdha12 / Pcdha11 / Pcdha10 / Pcdha1	protocadherin alpha 9 / protocadherin alpha subfamily C, 2 / protocadherin alpha subfamily C, 1 / protocadherin alpha 5 / protocadherin alpha 4 / protocadherin alpha 2 / protocadherin alpha 12 / protocadherin alpha 11 / protocadherin alpha 10 / protocadherin alpha 1	18	37089939	37347311	1	B2	ENSMUSG00000007440	TRUE	(ENSMUSG00000007440 ~ A_endothelial_reference + A_neuron_reference) BIC = -80.15	1	FALSE	NA	NA	3.11685e-05	NA	NA	0.00598812
M6pr	mannose-6-phosphate receptor, cation dependent	6	122258738	122267698	1	F1	ENSMUSG00000007458	FALSE	(ENSMUSG00000007458 ~ A_neuron_reference) BIC = -71.03;(ENSMUSG00000007458 ~ A_neuron_reference + A_oligodendrocyte_reference) BIC = -70.51;(ENSMUSG00000007458 ~ A_endothelial_reference + A_neuron_reference) BIC = -70.2;(ENSMUSG00000007458 ~ 1) BIC = -69.7	4	TRUE	A_neuron_reference = 1.815;A_oligodendrocyte_reference = 1.5739;A_endothelial_reference = 1.4821	NA	0.0695219	0.115505	NA	0.1383
Lrrc8a	leucine rich repeat containing 8A	2	30093235	30137668	1	B	ENSMUSG00000007476	FALSE	(ENSMUSG00000007476 ~ A_oligodendrocyte_reference) BIC = -42.39;(ENSMUSG00000007476 ~ A_endothelial_reference + A_oligodendrocyte_reference) BIC = -41.66	2	TRUE	A_oligodendrocyte_reference = 5.0047;A_endothelial_reference = 1.5145	NA	NA	5.6e-07	NA	0.129912
Ppp2r1a	protein phosphatase 2 (formerly 2A), regulatory subunit A (PR 65), alpha isoform	17	21082275	21102880	1	A3.2	ENSMUSG00000007564	FALSE	(ENSMUSG00000007564 ~ 1) BIC = -71.83;(ENSMUSG00000007564 ~ A_neuron_reference + A_oligodendrocyte_reference) BIC = -71.78;(ENSMUSG00000007564 ~ A_endothelial_reference) BIC = -70.79	3	TRUE	A_neuron_reference = 2.3543;A_oligodendrocyte_reference = 2.3412;A_endothelial_reference = 1.4486	NA	0.0185583	0.0192196	NA	0.14744
Fance	Fanconi anemia, complementation group E	17	28450475	28463513	1	A3.3	ENSMUSG00000007570	FALSE	(ENSMUSG00000007570 ~ A_astrocyte_reference + A_neuron_reference + A_oligodendrocyte_reference) BIC = -67.28;(ENSMUSG00000007570 ~ A_astrocyte_reference + A_microglia_reference + A_neuron_reference + A_oligodendrocyte_reference) BIC = -65.39	2	TRUE	A_astrocyte_reference = 2.7058;A_neuron_reference = 4.2867;A_oligodendrocyte_reference = 4.3743;A_microglia_reference = 1.0822	0.00681345	1.814e-05	1.218e-05	0.27918	NA
Tinf2	Terf1 (TRF1)-interacting nuclear factor 2	14	56295455	56300654	-1	C3	ENSMUSG00000007589	FALSE	(ENSMUSG00000007589 ~ A_microglia_reference + A_neuron_reference) BIC = -32.1;(ENSMUSG00000007589 ~ A_endothelial_reference + A_microglia_reference + A_neuron_reference) BIC = -30.63	2	TRUE	A_microglia_reference = 2.8107;A_neuron_reference = 2.9492;A_endothelial_reference = 1.2544	NA	0.00318571	NA	0.00494336	0.209684
Hapln4	hyaluronan and proteoglycan link protein 4	8	72607428	72614761	1	B3.3	ENSMUSG00000007594	FALSE	(ENSMUSG00000007594 ~ A_microglia_reference + A_neuron_reference) BIC = -37.05	1	FALSE	NA	NA	0.00326777	NA	0.430997	NA
Dus3l	dihydrouridine synthase 3-like (S. cerevisiae)	17	56904174	56909515	1	D	ENSMUSG00000007603	FALSE	(ENSMUSG00000007603 ~ A_endothelial_reference + A_microglia_reference) BIC = -35.82;(ENSMUSG00000007603 ~ A_endothelial_reference + A_microglia_reference + A_neuron_reference) BIC = -35.11	2	TRUE	A_endothelial_reference = 2.6008;A_microglia_reference = 2.6966;A_neuron_reference = 1.4873	NA	0.136935	NA	0.00700533	0.00930061
Gtpbp3	GTP binding protein 3	8	74012002	74023482	1	B3.3	ENSMUSG00000007610	FALSE	(ENSMUSG00000007610 ~ A_endothelial_reference + A_microglia_reference + A_oligodendrocyte_reference) BIC = -56.15	1	FALSE	NA	NA	NA	0.0177556	1.10499e-05	0.00021564
Tgfbr1	transforming growth factor, beta receptor I	4	47366094	47427803	1	B1	ENSMUSG00000007613	FALSE	(ENSMUSG00000007613 ~ A_oligodendrocyte_reference) BIC = -36.57;(ENSMUSG00000007613 ~ A_microglia_reference + A_oligodendrocyte_reference) BIC = -35.19	2	TRUE	A_oligodendrocyte_reference = 2.5398;A_microglia_reference = 1.3119	NA	NA	0.0110915	0.189562	NA
Homer1	homer homolog 1 (Drosophila)	13	94073712	94174917	1	C3	ENSMUSG00000007617	FALSE	(ENSMUSG00000007617 ~ 1) BIC = 5.37;(ENSMUSG00000007617 ~ A_microglia_reference) BIC = 5.81	2	TRUE	A_microglia_reference = 1.6316	NA	NA	NA	0.102769	NA
Rad51c	RAD51 homolog c (S. cerevisiae)	11	87190147	87218456	-1	C	ENSMUSG00000007646	FALSE	(ENSMUSG00000007646 ~ 1) BIC = -15.19;(ENSMUSG00000007646 ~ A_endothelial_reference) BIC = -14.43;(ENSMUSG00000007646 ~ A_endothelial_reference + A_oligodendrocyte_reference) BIC = -13.68	3	TRUE	A_endothelial_reference = 1.6525;A_oligodendrocyte_reference = 1.5073	NA	NA	0.131743	NA	0.0984426
Gabrb2	gamma-aminobutyric acid (GABA) A receptor, subunit beta 2	11	42233259	42446092	1	A5	ENSMUSG00000007653	FALSE	(ENSMUSG00000007653 ~ A_astrocyte_reference + A_oligodendrocyte_reference) BIC = -33.08;(ENSMUSG00000007653 ~ A_oligodendrocyte_reference) BIC = -32.66	2	TRUE	A_astrocyte_reference = 1.8311;A_oligodendrocyte_reference = 5.0549	0.0670813	NA	4.3e-07	NA	NA
Cav1	caveolin 1, caveolae protein	6	17256335	17291452	1	A2	ENSMUSG00000007655	FALSE	(ENSMUSG00000007655 ~ A_endothelial_reference + A_microglia_reference) BIC = -9.59;(ENSMUSG00000007655 ~ A_endothelial_reference) BIC = -8.63;(ENSMUSG00000007655 ~ A_astrocyte_reference + A_endothelial_reference + A_microglia_reference) BIC = -8.27	3	TRUE	A_endothelial_reference = 3.0663;A_microglia_reference = 1.8658;A_astrocyte_reference = 1.303	0.192583	NA	NA	0.062073	0.0021676
Arpp19	cAMP-regulated phosphoprotein 19	9	74885421	74908120	1	D	ENSMUSG00000007656	FALSE	(ENSMUSG00000007656 ~ A_neuron_reference) BIC = 12.83;(ENSMUSG00000007656 ~ A_endothelial_reference + A_neuron_reference) BIC = 13.22	2	TRUE	A_neuron_reference = 2.7819;A_endothelial_reference = 1.6118	NA	0.00540443	NA	NA	0.107016
Bcl2l1	BCL2-like 1	2	152593052	152657464	-1	H1	ENSMUSG00000007659	FALSE	(ENSMUSG00000007659 ~ A_endothelial_reference + A_oligodendrocyte_reference) BIC = -62.79;(ENSMUSG00000007659 ~ 1) BIC = -62.22;(ENSMUSG00000007659 ~ A_oligodendrocyte_reference) BIC = -61.81;(ENSMUSG00000007659 ~ A_endothelial_reference) BIC = -61.06	4	TRUE	A_endothelial_reference = 1.7529;A_oligodendrocyte_reference = 1.9021	NA	NA	0.0571583	NA	0.0796271
Khsrp	KH-type splicing regulatory protein	17	57160481	57170930	-1	D	ENSMUSG00000007670	FALSE	(ENSMUSG00000007670 ~ A_microglia_reference) BIC = -59.83;(ENSMUSG00000007670 ~ A_astrocyte_reference + A_microglia_reference) BIC = -59.74;(ENSMUSG00000007670 ~ 1) BIC = -59.03;(ENSMUSG00000007670 ~ A_microglia_reference + A_oligodendrocyte_reference) BIC = -58.31	4	TRUE	A_microglia_reference = 1.9871;A_astrocyte_reference = 1.6943;A_oligodendrocyte_reference = 1.2639	0.0901994	NA	0.206281	0.0469131	NA
Dio2	deiodinase, iodothyronine, type II	12	91962994	91976878	-1	D3	ENSMUSG00000007682	FALSE	(ENSMUSG00000007682 ~ 1) BIC = 27.63;(ENSMUSG00000007682 ~ A_microglia_reference) BIC = 29.19	2	TRUE	A_microglia_reference = 1.2751	NA	NA	NA	0.202277	NA
Ccdc124	coiled-coil domain containing 124	8	73392126	73397389	-1	B3.3	ENSMUSG00000007721	FALSE	(ENSMUSG00000007721 ~ A_neuron_reference + A_oligodendrocyte_reference) BIC = -40.25;(ENSMUSG00000007721 ~ A_endothelial_reference + A_neuron_reference + A_oligodendrocyte_reference) BIC = -38.39	2	TRUE	A_neuron_reference = 2.1939;A_oligodendrocyte_reference = 3.2722;A_endothelial_reference = 1.1162	NA	0.0282435	0.00106723	NA	0.264339
Cct4	chaperonin containing Tcp1, subunit 4 (delta)	11	22890519	22903780	1	A3.2	ENSMUSG00000007739	FALSE	(ENSMUSG00000007739 ~ A_astrocyte_reference + A_oligodendrocyte_reference) BIC = -68.24;(ENSMUSG00000007739 ~ 1) BIC = -68.03;(ENSMUSG00000007739 ~ A_astrocyte_reference) BIC = -66.89	3	TRUE	A_astrocyte_reference = 1.8013;A_oligodendrocyte_reference = 2.0557	0.0716503	NA	0.0398085	NA	NA
0610009B22Rik	RIKEN cDNA 0610009B22 gene	11	51498888	51502376	-1	B1.3	ENSMUSG00000007777	FALSE	(ENSMUSG00000007777 ~ 1) BIC = -56.91	1	FALSE	NA	NA	NA	NA	NA	NA
Cpt1c	carnitine palmitoyltransferase 1c	7	52214743	52230184	-1	B4	ENSMUSG00000007783	FALSE	(ENSMUSG00000007783 ~ A_microglia_reference + A_oligodendrocyte_reference) BIC = -62.28;(ENSMUSG00000007783 ~ A_astrocyte_reference + A_microglia_reference + A_oligodendrocyte_reference) BIC = -60.65	2	TRUE	A_microglia_reference = 2.4339;A_oligodendrocyte_reference = 3.7278;A_astrocyte_reference = 1.1977	0.231045	NA	0.00019314	0.0149351	NA
Twist2	twist homolog 2 (Drosophila)	1	93698038	93744605	1	D	ENSMUSG00000007805	FALSE	(ENSMUSG00000007805 ~ A_neuron_reference) BIC = 33.47	1	FALSE	NA	NA	3.18372e-07	NA	NA	NA
Zfp655	zinc finger protein 655	5	145992592	146008175	1	G2	ENSMUSG00000007812	FALSE	(ENSMUSG00000007812 ~ 1) BIC = -61.93;(ENSMUSG00000007812 ~ A_astrocyte_reference) BIC = -60.68	2	TRUE	A_astrocyte_reference = 1.3792	0.167828	NA	NA	NA	NA
Rhoa	ras homolog gene family, member A	9	108208536	108240270	1	F2	ENSMUSG00000007815	FALSE	(ENSMUSG00000007815 ~ A_endothelial_reference + A_microglia_reference) BIC = -93.17;(ENSMUSG00000007815 ~ A_endothelial_reference + A_microglia_reference + A_neuron_reference) BIC = -92.96;(ENSMUSG00000007815 ~ A_microglia_reference + A_neuron_reference) BIC = -91.43	3	TRUE	A_endothelial_reference = 2.1569;A_microglia_reference = 4.5875;A_neuron_reference = 1.6914	NA	0.090754	NA	4.49e-06	0.0310166
Zmiz1	zinc finger, MIZ-type containing 1	14	26278671	26486229	1	A3	ENSMUSG00000007817	FALSE	(ENSMUSG00000007817 ~ A_endothelial_reference + A_neuron_reference) BIC = -16.38;(ENSMUSG00000007817 ~ A_endothelial_reference + A_neuron_reference + A_oligodendrocyte_reference) BIC = -14.72;(ENSMUSG00000007817 ~ A_neuron_reference + A_oligodendrocyte_reference) BIC = -14.68	3	TRUE	A_endothelial_reference = 2.0792;A_neuron_reference = 2.24;A_oligodendrocyte_reference = 1.4728	NA	0.02509	0.140807	NA	0.0375989
Ankrd26	ankyrin repeat domain 26	6	118452582	118512274	-1	F1	ENSMUSG00000007827	FALSE	(ENSMUSG00000007827 ~ A_endothelial_reference + A_neuron_reference + A_oligodendrocyte_reference) BIC = -27.31;(ENSMUSG00000007827 ~ A_endothelial_reference) BIC = -26.85;(ENSMUSG00000007827 ~ A_endothelial_reference + A_neuron_reference) BIC = -25.75	3	TRUE	A_endothelial_reference = 3.3988;A_neuron_reference = 1.7111;A_oligodendrocyte_reference = 2.0609	NA	0.0870595	0.0393157	NA	0.00067689
Aldh16a1	aldehyde dehydrogenase 16 family, member A1	7	52396054	52409954	-1	B4	ENSMUSG00000007833	FALSE	(ENSMUSG00000007833 ~ A_endothelial_reference + A_neuron_reference) BIC = -34.41	1	FALSE	NA	NA	0.00543454	NA	NA	0.0156257
Hnrnpa0	heterogeneous nuclear ribonucleoprotein A0	13	58227240	58229917	-1	B1	ENSMUSG00000007836	FALSE	(ENSMUSG00000007836 ~ A_neuron_reference + A_oligodendrocyte_reference) BIC = -63.88;(ENSMUSG00000007836 ~ 1) BIC = -62.09	2	TRUE	A_neuron_reference = 2.7055;A_oligodendrocyte_reference = 2.6755	NA	0.00682097	0.00746151	NA	NA
Prrg2	proline-rich Gla (G-carboxyglutamic acid) polypeptide 2	7	52308983	52318047	-1	B4	ENSMUSG00000007837	FALSE	(ENSMUSG00000007837 ~ A_astrocyte_reference + A_oligodendrocyte_reference) BIC = -34.38	1	FALSE	NA	0.392666	NA	2.76993e-05	NA	NA
Hnrnph1	heterogeneous nuclear ribonucleoprotein H1	11	50190492	50200030	1	B1.3	ENSMUSG00000007850	FALSE	(ENSMUSG00000007850 ~ A_oligodendrocyte_reference) BIC = -47.17	1	FALSE	NA	NA	NA	0.00453899	NA	NA
1700019E19Rik	RIKEN cDNA 1700019E19 gene	12	87423513	87503408	1	D2	ENSMUSG00000007867	FALSE	(ENSMUSG00000007867 ~ A_neuron_reference + A_oligodendrocyte_reference) BIC = -25.28;(ENSMUSG00000007867 ~ 1) BIC = -23.78;(ENSMUSG00000007867 ~ A_microglia_reference + A_neuron_reference + A_oligodendrocyte_reference) BIC = -23.65	3	TRUE	A_neuron_reference = 2.607;A_oligodendrocyte_reference = 2.6327;A_microglia_reference = 1.1974	NA	0.00913442	0.00847128	0.231157	NA
Id3	inhibitor of DNA binding 3	4	135699412	135701670	1	D3	ENSMUSG00000007872	FALSE	(ENSMUSG00000007872 ~ A_endothelial_reference + A_microglia_reference) BIC = -21.12;(ENSMUSG00000007872 ~ A_endothelial_reference + A_neuron_reference) BIC = -20.62;(ENSMUSG00000007872 ~ A_astrocyte_reference + A_endothelial_reference) BIC = -19.74;(ENSMUSG00000007872 ~ A_endothelial_reference + A_microglia_reference + A_neuron_reference) BIC = -19.67	4	TRUE	A_endothelial_reference = 3.3725;A_microglia_reference = 1.954;A_neuron_reference = 1.7455;A_astrocyte_reference = 2.1461	0.0318675	0.0809008	NA	0.0507043	0.00074494
Tcap	titin-cap	11	98245125	98246267	1	D	ENSMUSG00000007877	FALSE	(ENSMUSG00000007877 ~ A_neuron_reference) BIC = 55.54;(ENSMUSG00000007877 ~ A_astrocyte_reference) BIC = 56.15;(ENSMUSG00000007877 ~ A_oligodendrocyte_reference) BIC = 57.03	3	TRUE	A_neuron_reference = 2.7966;A_astrocyte_reference = 2.6729;A_oligodendrocyte_reference = 2.4897	0.00751908	0.00516375	0.0127852	NA	NA
Arid1a	AT rich interactive domain 1A (SWI-like)	4	133234923	133312684	-1	D3	ENSMUSG00000007880	FALSE	(ENSMUSG00000007880 ~ A_microglia_reference + A_oligodendrocyte_reference) BIC = -53.61;(ENSMUSG00000007880 ~ A_microglia_reference + A_neuron_reference + A_oligodendrocyte_reference) BIC = -52.7	2	TRUE	A_microglia_reference = 2.8102;A_oligodendrocyte_reference = 2.3698;A_neuron_reference = 1.4299	NA	0.15274	0.0177988	0.00495118	NA
Crlf1	cytokine receptor-like factor 1	8	73017057	73027980	1	B3.3	ENSMUSG00000007888	FALSE	(ENSMUSG00000007888 ~ A_oligodendrocyte_reference) BIC = 25.49;(ENSMUSG00000007888 ~ A_neuron_reference) BIC = 26.68;(ENSMUSG00000007888 ~ A_microglia_reference + A_oligodendrocyte_reference) BIC = 27.11	3	TRUE	A_oligodendrocyte_reference = 2.5519;A_neuron_reference = 2.3669;A_microglia_reference = 1.2292	NA	0.0179375	0.0107133	0.21898	NA
Ctsd	cathepsin D	7	149557053	149573943	-1	F5	ENSMUSG00000007891	FALSE	(ENSMUSG00000007891 ~ A_endothelial_reference + A_microglia_reference + A_neuron_reference) BIC = -61.23;(ENSMUSG00000007891 ~ A_astrocyte_reference + A_endothelial_reference + A_microglia_reference + A_neuron_reference) BIC = -59.25	2	TRUE	A_endothelial_reference = 2.8004;A_microglia_reference = 2.5354;A_neuron_reference = 4.1119;A_astrocyte_reference = 1.0478	0.294716	3.923e-05	NA	0.0112334	0.00510371
Rplp1	ribosomal protein, large, P1	9	61761091	61762345	-1	B	ENSMUSG00000007892	FALSE	(ENSMUSG00000007892 ~ A_endothelial_reference + A_neuron_reference + A_oligodendrocyte_reference) BIC = -32.13;(ENSMUSG00000007892 ~ A_neuron_reference + A_oligodendrocyte_reference) BIC = -31.52;(ENSMUSG00000007892 ~ A_endothelial_reference + A_microglia_reference + A_neuron_reference + A_oligodendrocyte_reference) BIC = -30.46	3	TRUE	A_endothelial_reference = 1.89;A_neuron_reference = 3.1778;A_oligodendrocyte_reference = 3.0162;A_microglia_reference = 1.1622	NA	0.00148381	0.00255985	0.245152	0.0587636
Hmgcll1	3-hydroxymethyl-3-methylglutaryl-Coenzyme A lyase-like 1	9	75862662	75984157	1	D	ENSMUSG00000007908	FALSE	(ENSMUSG00000007908 ~ A_microglia_reference + A_neuron_reference) BIC = -72.35;(ENSMUSG00000007908 ~ A_neuron_reference) BIC = -71.78	2	TRUE	A_microglia_reference = 1.8663;A_neuron_reference = 4.7901	NA	1.67e-06	NA	0.0620035	NA
Ttc9b	tetratricopeptide repeat domain 9B	7	28438934	28441227	1	A3	ENSMUSG00000007944	FALSE	(ENSMUSG00000007944 ~ A_oligodendrocyte_reference) BIC = 13.74	1	FALSE	NA	NA	NA	2.39912e-05	NA	NA
Abhd8	abhydrolase domain containing 8	8	73980599	73987556	-1	B3.3	ENSMUSG00000007950	FALSE	(ENSMUSG00000007950 ~ A_neuron_reference + A_oligodendrocyte_reference) BIC = -55.61	1	FALSE	NA	NA	0.447275	4.98007e-05	NA	NA
[truncated: 14,074 more rows]

## Sheet: FCX
mgi_symbol	mgi_description	chromosome_name	start_position	end_position	strand	band	ensembl_gene_id	duplicate	model_summary	n_models	polymodel	polymodel_z_scores	FCX_astrocyte_reference	FCX_neuron_reference	FCX_oligodendrocyte_reference	FCX_microglia_reference	FCX_endothelial_reference
[truncated: 15,020 more rows]

[truncated: 1 more sheets: HYP]
